# Supplementary material for: Tissue-Specific miRNAs Regulate the Development of Thoracic Aortic Aneurysm: The Emerging Role of KLF4 Network
Source: J Clin Med. 2019 Oct 3;8(10):1609. doi: 10.3390/jcm8101609 (PMC6832203; doi:10.3390/jcm8101609)
Supplement: Supplementary file 1 [file jcm-08-01609-s001.zip]

Archive with 4 entries (4 files):
- Supplement file 1.xls
- Supplement file 2.xls
- Supplement file 3.xls
- Supplementary_material.pdf
