# Supplementary material for: Tissue-Specific miRNAs Regulate the Development of Thoracic Aortic Aneurysm: The Emerging Role of KLF4 Network
Source: J Clin Med. 2019 Oct 3;8(10):1609. doi: 10.3390/jcm8101609 (PMC6832203; doi:10.3390/jcm8101609)
Supplement: Supplementary file 1 [file jcm-08-01609-s001.zip › Supplement file 1.xls]

## Sheet: mir-Seq analysis tissue
Supplement file 1. A detailed evaluation of differential miRNA-Seq data of each tissue sample assessed in the present study
						Raw read counts														Normalized read counts
			Normal tissue							Aneurysm tissue							Normal tissue							Aneurysm tissue
miRNA	N1	N2	N3	N4	N5	N6	AN1	AN2	AN3	AN4	AN5	AN6	AN7	AN8	N1	N2	N3	N4	N5	N6	AN1	AN2	AN3	AN4	AN5	AN6	AN7	AN8	baseMean	LogFoldChange(Aneurysm/Normal)	P value	Adjusted P value
hsa-miR-155-5p	546	917	412	840	925	939	329	415	211	485	265	324	356	267	564.8	838.6	569.7	617.6	732.9	687.9	340	457.9	231.7	309.2	320.6	318.4	477.8	283.7	482.2	-0.9126	0	0
hsa-miR-133a-3p	337	379	351	527	656	571	238	271	170	390	227	271	170	236	348.6	346.6	485.4	387.4	519.8	418.3	246	299	186.6	248.6	274.6	266.3	228.2	250.8	321.9	-0.7119	0	0.0001
hsa-miR-10a-5p	1359	809	1685	1604	958	1335	3326	1090	2662	6919	2961	3983	3229	4286	1405.9	739.8	2330	1179.2	759.1	978	3437.5	1202.8	2922.7	4411.1	3582	3913.9	4333.7	4554.3	2553.6	1.2917	0	0.0001
hsa-miR-10a-3p	9	8	6	16	9	7	25	15	7	63	28	46	29	22	9.3	7.3	8.3	11.8	7.1	5.1	25.8	16.6	7.7	40.2	33.9	45.2	38.9	23.4	20	1.4279	0	0.0002
hsa-miR-99a-5p	2433	1932	2734	4489	3225	3623	5318	3113	3449	8541	3566	5367	4225	4589	2517	1766.8	3780.5	3300.3	2555.3	2654.2	5496.3	3435	3786.8	5445.2	4313.9	5273.9	5670.4	4876.3	3919.4	0.7459	0	0.0011
hsa-miR-126-3p	3348	1968	2133	3195	5535	5845	6930	5064	5653	13925	7207	5216	3057	5470	3463.5	1799.7	2949.5	2348.9	4385.6	4282	7162.3	5587.8	6206.7	8877.6	8718.5	5125.6	4102.8	5812.4	5058.8	0.9127	0	0.0011
hsa-miR-150-5p	35	32	51	89	108	53	217	79	150	194	184	111	79	73	36.2	29.3	70.5	65.4	85.6	38.8	224.3	87.2	164.7	123.7	222.6	109.1	106	77.6	102.9	1.1412	0	0.0011
hsa-miR-148a-3p	2590	2782	1255	3342	1944	3588	4916	3348	3698	5787	5012	3163	2302	3169	2679.4	2544.1	1735.4	2457	1540.3	2628.5	5080.8	3694.3	4060.2	3689.4	6063.2	3108.2	3089.6	3367.4	3267	0.7702	0	0.0015
hsa-miR-199b-5p	205	129	124	248	438	519	567	391	794	1649	586	367	169	456	212.1	118	171.5	182.3	347	380.2	586	431.4	871.8	1051.3	708.9	360.6	226.8	484.5	438	1.0844	0.0001	0.0047
hsa-miR-30b-5p	2274	2523	2075	3430	3017	3948	2135	2110	1548	2882	1573	1590	1391	1869	2352.5	2307.3	2869.3	2521.7	2390.5	2892.3	2206.6	2328.3	1699.6	1837.4	1902.9	1562.4	1866.9	1986	2194.5	-0.3996	0.0004	0.0155
hsa-miR-139-5p	16	19	23	41	49	54	48	44	59	113	61	49	23	45	16.6	17.4	31.8	30.1	38.8	39.6	49.6	48.6	64.8	72	73.8	48.2	30.9	47.8	43.6	0.7975	0.0007	0.022
hsa-miR-10b-5p	834	812	700	806	1666	1582	1869	910	2337	2708	2042	1444	840	1274	862.8	742.6	967.9	592.6	1320	1159	1931.7	1004.1	2565.9	1726.4	2470.3	1419	1127.4	1353.8	1374.5	0.7615	0.0008	0.022
hsa-miR-126-5p	458	334	232	306	529	677	1617	985	725	920	808	445	252	517	473.8	305.4	320.8	225	419.2	496	1671.2	1086.9	796	586.5	977.5	437.3	338.2	549.4	620.2	0.9201	0.0008	0.022
hsa-miR-21-5p	40486	70308	51717	67777	63086	74250	109579	121766	52667	139517	36691	94181	110799	100614	41883.3	64296.8	71513.3	49829	49986	54394.9	113252	134362	57825.2	88946.7	44386.1	92547.8	148705	106913	79917.2	0.7408	0.0011	0.0281
hsa-miR-1-3p	9290	4297	5732	7129	13086	15562	4236	4701	3732	6861	4840	3991	3817	5586	9610.6	3929.6	7926.1	5241.2	10368.6	11400.6	4378	5187.3	4097.5	4374.1	5855.1	3921.8	5122.9	5935.7	6239.2	-0.6678	0.0014	0.0345
hsa-miR-146a-5p	106	278	234	564	249	272	380	312	613	922	328	438	291	333	109.7	254.2	323.6	414.6	197.3	199.3	392.7	344.3	673	587.8	396.8	430.4	390.6	353.8	362	0.7376	0.0019	0.0417
hsa-miR-28-3p	2259	1535	1275	2617	2099	2386	1117	1301	1798	1879	920	1051	861	1107	2337	1403.8	1763	1924	1663.1	1748	1154.4	1435.6	1974.1	1197.9	1112.9	1032.8	1155.6	1176.3	1505.6	-0.4712	0.0038	0.0794
hsa-miR-214-5p	42	61	28	63	67	91	72	55	82	102	49	71	60	77	43.4	55.8	38.7	46.3	53.1	66.7	74.4	60.7	90	65	59.3	69.8	80.5	81.8	63.3	0.4757	0.0047	0.0931
hsa-miR-98-5p	1027	960	637	1218	1041	1094	628	570	628	1303	645	598	522	767	1062.4	877.9	880.8	895.5	824.8	801.5	649.1	629	689.5	830.7	780.3	587.6	700.6	815	787.5	-0.3172	0.0053	0.0995
hsa-miR-145-5p	16098	28647	20180	42687	30521	38137	16498	16465	12716	27491	14194	24754	16090	18911	16653.6	26197.7	27904.5	31383.1	24183.2	27938.9	17051.1	18168.2	13961.4	17526.4	17170.9	24324.8	21594.6	20094.9	21725.2	-0.4346	0.0055	0.0995
hsa-miR-542-3p	11	14	8	13	14	18	28	19	26	46	17	8	8	18	11.4	12.8	11.1	9.6	11.1	13.2	28.9	21	28.5	29.3	20.6	7.9	10.7	19.1	16.8	0.7166	0.009	0.1547
hsa-miR-1307-3p	8	25	18	42	24	26	5	9	17	21	14	6	6	9	8.3	22.9	24.9	30.9	19	19	5.2	9.9	18.7	13.4	16.9	5.9	8.1	9.6	15.2	-0.7457	0.0106	0.1669
hsa-miR-100-5p	17375	22502	14744	25126	22425	24379	18438	15691	13172	16314	9899	15724	10921	13727	17974.7	20578.1	20387.7	18472.4	17768.4	17859.9	19056.1	17314.1	14462.1	10400.7	11975.1	15451.3	14657.2	14586.3	16496	-0.342	0.0108	0.1669
hsa-miR-148a-5p	5	14	3	13	9	7	26	7	13	23	12	18	8	9	5.2	12.8	4.1	9.6	7.1	5.1	26.9	7.7	14.3	14.7	14.5	17.7	10.7	9.6	11.4	0.7614	0.0112	0.1669
hsa-miR-511-5p	8	2	2	12	1	2	24	9	10	40	9	7	4	1	8.3	1.8	2.8	8.8	0.8	1.5	24.8	9.9	11	25.5	10.9	6.9	5.4	1.1	8.5	0.8822	0.015	0.2158
hsa-miR-337-5p	19	20	14	6	6	16	0	0	0	9	9	9	2	4	19.7	18.3	19.4	4.4	4.8	11.7	0	0	0	5.7	10.9	8.8	2.7	4.3	7.9	-0.8754	0.0167	0.2216
hsa-miR-28-5p	2444	1642	1203	1673	1672	1952	1201	1699	1029	1319	696	930	686	1076	2528.3	1501.6	1663.5	1230	1324.8	1430	1241.3	1874.7	1129.8	840.9	842	913.9	920.7	1143.4	1327.5	-0.4893	0.0167	0.2216
hsa-miR-24-3p	34292	33628	21059	36013	34719	38141	15848	20661	16835	27755	19244	27399	23140	23399	35475.5	30752.9	29120	26476.4	27509.5	27941.8	16379.3	22798.2	18483.8	17694.7	23280	26923.9	31056.6	24863.8	25625.5	-0.3638	0.0176	0.2242
hsa-miR-342-3p	129	205	154	320	200	213	289	214	198	346	180	352	162	181	133.5	187.5	212.9	235.3	158.5	156	298.7	236.1	217.4	220.6	217.8	345.9	217.4	192.3	216.4	0.406	0.0181	0.2242
hsa-miR-503-5p	5	1	3	4	7	0	3	21	15	19	5	6	2	3	5.2	0.9	4.1	2.9	5.5	0	3.1	23.2	16.5	12.1	6	5.9	2.7	3.2	6.5	0.8475	0.0199	0.2318
hsa-miR-142-3p	66	30	31	50	93	57	138	152	21	125	128	31	75	58	68.3	27.4	42.9	36.8	73.7	41.8	142.6	167.7	23.1	79.7	154.8	30.5	100.7	61.6	75.1	0.7315	0.02	0.2318
hsa-miR-9-3p	31	152	11	21	40	47	3	33	47	9	9	9	5	4	32.1	139	15.2	15.4	31.7	34.4	3.1	36.4	51.6	5.7	10.9	8.8	6.7	4.3	28.2	-0.8393	0.021	0.2351
hsa-miR-146b-5p	1726	1080	509	850	1818	1756	1918	1867	1948	2332	1534	1465	917	1179	1785.6	987.7	703.8	624.9	1440.5	1286.4	1982.3	2060.1	2138.8	1486.7	1855.7	1439.6	1230.7	1252.8	1448.3	0.5047	0.0229	0.2496
hsa-miR-1260b	73	81	54	102	110	71	80	40	125	195	82	131	95	86	75.5	74.1	74.7	75	87.2	52	82.7	44.1	137.2	124.3	99.2	128.7	127.5	91.4	91	0.4679	0.0293	0.3092
hsa-miR-181d-5p	45	73	46	118	68	97	43	50	31	71	35	65	45	39	46.6	66.8	63.6	86.8	53.9	71.1	44.4	55.2	34	45.3	42.3	63.9	60.4	41.4	55.4	-0.3985	0.0355	0.3299
hsa-let-7d-5p	1135	1663	774	1640	1290	1499	849	948	950	1465	719	1290	677	782	1174.2	1520.8	1070.3	1205.7	1022.1	1098.2	877.5	1046.1	1043	934	869.8	1267.6	908.6	831	1062.1	-0.2725	0.0361	0.3299
hsa-miR-152-5p	2	3	0	1	0	3	6	7	9	3	1	1	2	3	2.1	2.7	0	0.7	0	2.2	6.2	7.7	9.9	1.9	1.2	1	2.7	3.2	3	0.767	0.0361	0.3299
hsa-miR-5683	1	0	1	0	1	0	17	0	0	0	22	2	0	11	1	0	1.4	0	0.8	0	17.6	0	0	0	26.6	2	0	11.7	4.4	0.6594	0.0362	0.3299
hsa-miR-708-5p	29	37	15	27	42	37	30	30	24	82	28	31	49	47	30	33.8	20.7	19.9	33.3	27.1	31	33.1	26.4	52.3	33.9	30.5	65.8	49.9	34.8	0.4869	0.0364	0.3299
hsa-let-7c-5p	686	761	986	1682	830	1094	1170	763	982	2988	944	1209	962	1333	709.7	695.9	1363.4	1236.6	657.6	801.5	1209.2	841.9	1078.2	1904.9	1142	1188	1291.1	1416.4	1109.8	0.428	0.0368	0.3299
hsa-miR-381-3p	139	101	49	56	74	64	39	21	52	122	40	56	23	41	143.8	92.4	67.8	41.2	58.6	46.9	40.3	23.2	57.1	77.8	48.4	55	30.9	43.6	59.1	-0.5535	0.0417	0.3641
hsa-miR-651-5p	7	2	2	2	4	8	9	21	8	8	6	3	2	7	7.2	1.8	2.8	1.5	3.2	5.9	9.3	23.2	8.8	5.1	7.3	2.9	2.7	7.4	6.4	0.7179	0.0426	0.3641
hsa-miR-221-5p	23	28	23	51	45	45	30	29	37	77	32	47	34	46	23.8	25.6	31.8	37.5	35.7	33	31	32	40.6	49.1	38.7	46.2	45.6	48.9	37.1	0.3778	0.0465	0.3882
hsa-let-7d-3p	69	195	121	266	241	219	64	106	121	183	112	146	94	93	71.4	178.3	167.3	195.6	191	160.4	66.1	117	132.9	116.7	135.5	143.5	126.2	98.8	135.8	-0.417	0.0491	0.4004
hsa-miR-222-3p	285	581	512	1031	674	688	557	549	547	1233	415	1467	791	755	294.8	531.3	708	758	534	504	575.7	605.8	600.6	786.1	502	1441.6	1061.6	802.3	693.3	0.4594	0.0533	0.4256
hsa-miR-4485-3p	1	0	1	3	4	0	0	0	25	3	7	5	1	3	1	0	1.4	2.2	3.2	0	0	0	27.4	1.9	8.5	4.9	1.3	3.2	3.9	0.6649	0.0556	0.4343
hsa-miR-99b-5p	2163	2969	1849	4465	2910	3296	2282	1978	1925	3453	1518	2704	1691	1960	2237.7	2715.2	2556.8	3282.6	2305.7	2414.6	2358.5	2182.6	2113.5	2201.4	1836.4	2657.1	2269.5	2082.7	2372.4	-0.2188	0.06	0.4582
hsa-miR-143-3p	2476342	2134004	1186979	1943800	2238571	2870900	1956747	1796932	993562	1468361	1015000	980880	1188808	1633067	2.56181e+06	1.95155e+06	1.64133e+06	1.42906e+06	1773724	2.1032e+06	2.02234e+06	1.98281e+06	1.09087e+06	936128	1.22787e+06	963871	1595518	1.7353e+06	1.64396e+06	-0.3695	0.0685	0.504
hsa-miR-362-5p	30	47	19	52	33	50	39	32	39	88	26	58	30	45	31	43	26.3	38.2	26.1	36.6	40.3	35.3	42.8	56.1	31.5	57	40.3	47.8	39.5	0.359	0.0688	0.504
hsa-miR-455-3p	172	163	155	334	321	330	67	73	86	279	146	233	118	211	177.9	149.1	214.3	245.6	254.3	241.8	69.2	80.6	94.4	177.9	176.6	229	158.4	224.2	178.1	-0.4342	0.0785	0.5594
hsa-miR-101-3p	7343	9007	2624	6684	8527	11248	19101	14146	7445	7762	6611	4644	5865	8521	7596.4	8236.9	3628.4	4914	6756.3	8240.2	19741.3	15609.3	8174.2	4948.5	7997.5	4563.5	7871.5	9054.4	8380.9	0.4754	0.081	0.5594
hsa-miR-133b	3	4	6	4	6	7	2	4	1	3	2	2	1	3	3.1	3.7	8.3	2.9	4.8	5.1	2.1	4.4	1.1	1.9	2.4	2	1.3	3.2	3.3	-0.6134	0.083	0.5594
hsa-miR-1307-5p	3	14	6	8	3	4	3	2	6	4	4	1	1	1	3.1	12.8	8.3	5.9	2.4	2.9	3.1	2.2	6.6	2.6	4.8	1	1.3	1.1	4.1	-0.6196	0.0847	0.5594
hsa-miR-215-5p	2	4	4	5	23	16	20	5	5	24	17	29	5	11	2.1	3.7	5.5	3.7	18.2	11.7	20.7	5.5	5.5	15.3	20.6	28.5	6.7	11.7	11.4	0.5988	0.0853	0.5594
hsa-miR-181a-3p	4	3	3	18	12	12	21	22	41	12	6	10	2	2	4.1	2.7	4.1	13.2	9.5	8.8	21.7	24.3	45	7.7	7.3	9.8	2.7	2.1	11.7	0.6168	0.0872	0.5594
hsa-miR-30e-3p	607	1040	684	1476	796	886	646	793	748	861	498	570	480	462	627.9	951.1	945.8	1085.1	630.7	649.1	667.7	875	821.3	548.9	602.4	560.1	644.2	490.9	721.5	-0.3033	0.0873	0.5594
hsa-miR-10b-3p	3	5	1	6	10	7	8	2	11	8	12	7	3	12	3.1	4.6	1.4	4.4	7.9	5.1	8.3	2.2	12.1	5.1	14.5	6.9	4	12.8	6.6	0.5754	0.0891	0.5607
hsa-miR-29a-3p	6134	6988	4285	7577	7784	8522	8203	6868	6300	7871	5787	6214	5646	7211	6345.7	6390.5	5925.2	5570.5	6167.6	6243.1	8478	7578.4	6917	5018	7000.7	6106.2	7577.6	7662.4	6641.5	0.1999	0.0906	0.5607
hsa-miR-204-5p	191	94	170	342	166	160	120	100	112	189	132	139	96	123	197.6	86	235.1	251.4	131.5	117.2	124	110.3	123	120.5	159.7	136.6	128.8	130.7	146.6	-0.3555	0.0948	0.5767
hsa-miR-769-5p	56	107	57	130	107	139	124	181	139	119	79	92	68	79	57.9	97.9	78.8	95.6	84.8	101.8	128.2	199.7	152.6	75.9	95.6	90.4	91.3	83.9	102.5	0.3663	0.0972	0.5809
hsa-miR-320a-3p	949	974	637	1359	772	758	702	505	1910	1548	811	1566	763	993	981.8	890.7	880.8	999.1	611.7	555.3	725.5	557.2	2097.1	986.9	981.1	1538.8	1024	1055.2	991.8	0.3959	0.0989	0.5809
hsa-miR-142-5p	121	53	30	79	109	78	170	242	15	103	178	47	86	60	125.2	48.5	41.5	58.1	86.4	57.1	175.7	267	16.5	65.7	215.3	46.2	115.4	63.8	98.7	0.5526	0.1003	0.5809
hsa-miR-154-3p	16	15	3	7	18	17	7	1	4	14	3	7	10	7	16.6	13.7	4.1	5.1	14.3	12.5	7.2	1.1	4.4	8.9	3.6	6.9	13.4	7.4	8.5	-0.5372	0.1027	0.585
hsa-miR-4508	4	1	1	0	3	4	2	0	15	6	0	6	4	7	4.1	0.9	1.4	0	2.4	2.9	2.1	0	16.5	3.8	0	5.9	5.4	7.4	3.8	0.586	0.1068	0.5992
hsa-miR-409-5p	5	15	10	9	16	8	35	16	31	31	5	10	1	10	5.2	13.7	13.8	6.6	12.7	5.9	36.2	17.7	34	19.8	6	9.8	1.3	10.6	13.8	0.5497	0.112	0.6036
hsa-miR-450a-5p	4	3	0	16	4	9	16	8	2	28	7	4	5	8	4.1	2.7	0	11.8	3.2	6.6	16.5	8.8	2.2	17.9	8.5	3.9	6.7	8.5	7.2	0.5622	0.1135	0.6036
hsa-miR-29c-5p	43	68	40	97	71	70	59	57	43	50	38	37	32	35	44.5	62.2	55.3	71.3	56.3	51.3	61	62.9	47.2	31.9	46	36.4	42.9	37.2	50.4	-0.3023	0.1159	0.6036
hsa-miR-9985	7	2	5	10	28	17	5	4	2	8	2	5	9	8	7.2	1.8	6.9	7.4	22.2	12.5	5.2	4.4	2.2	5.1	2.4	4.9	12.1	8.5	7.3	-0.5432	0.1175	0.6036
hsa-miR-423-5p	88	97	60	126	131	127	65	95	191	255	69	131	72	95	91	88.7	83	92.6	103.8	93	67.2	104.8	209.7	162.6	83.5	128.7	96.6	100.9	107.6	0.3392	0.1183	0.6036
hsa-miR-335-3p	35	11	31	27	61	70	64	37	31	90	163	53	9	22	36.2	10.1	42.9	19.9	48.3	51.3	66.1	40.8	34	57.4	197.2	52.1	12.1	23.4	49.4	0.5334	0.1205	0.6036
hsa-miR-30d-5p	13285	14310	8462	17464	16293	19471	14357	15344	8442	13532	7668	8703	6803	8846	13743.5	13086.5	11701.1	12839.4	12909.7	14264.3	14838.3	16931.2	9268.8	8627.1	9276.2	8552.1	9130.4	9399.8	11754.9	-0.2671	0.1212	0.6036
hsa-miR-708-3p	19	24	4	5	28	21	79	8	17	31	5	17	27	23	19.7	21.9	5.5	3.7	22.2	15.4	81.6	8.8	18.7	19.8	6	16.7	36.2	24.4	21.5	0.5418	0.1218	0.6036
hsa-miR-139-3p	2	3	3	1	2	2	2	2	6	5	6	3	4	2	2.1	2.7	4.1	0.7	1.6	1.5	2.1	2.2	6.6	3.2	7.3	2.9	5.4	2.1	3.2	0.5548	0.124	0.6036
hsa-miR-133a-5p	3	3	7	10	6	10	0	2	1	6	5	5	4	2	3.1	2.7	9.7	7.4	4.8	7.3	0	2.2	1.1	3.8	6	4.9	5.4	2.1	4.3	-0.5434	0.1246	0.6036
hsa-miR-625-3p	4	4	2	0	10	7	12	8	18	8	6	3	1	4	4.1	3.7	2.8	0	7.9	5.1	12.4	8.8	19.8	5.1	7.3	2.9	1.3	4.3	6.1	0.5498	0.1286	0.6036
hsa-miR-320b	31	33	23	35	27	24	13	13	48	47	35	61	30	45	32.1	30.2	31.8	25.7	21.4	17.6	13.4	14.3	52.7	30	42.3	59.9	40.3	47.8	32.8	0.4229	0.1299	0.6036
hsa-miR-378a-3p	71	68	60	112	152	204	152	92	110	177	251	114	56	77	73.5	62.2	83	82.3	120.4	149.4	157.1	101.5	120.8	112.8	303.6	112	75.2	81.8	116.8	0.4034	0.1329	0.6036
hsa-miR-539-3p	25	16	3	4	24	21	6	1	7	20	5	7	8	12	25.9	14.6	4.1	2.9	19	15.4	6.2	1.1	7.7	12.8	6	6.9	10.7	12.8	10.4	-0.5151	0.1336	0.6036
hsa-miR-92b-3p	71	151	80	192	151	84	133	188	142	238	74	132	99	93	73.5	138.1	110.6	141.2	119.6	61.5	137.5	207.4	155.9	151.7	89.5	129.7	132.9	98.8	124.9	0.3261	0.1337	0.6036
hsa-miR-654-3p	102	127	56	75	109	103	58	37	90	157	52	71	29	46	105.5	116.1	77.4	55.1	86.4	75.5	59.9	40.8	98.8	100.1	62.9	69.8	38.9	48.9	74	-0.3487	0.1345	0.6036
hsa-miR-331-3p	42	53	83	159	126	165	43	35	37	90	69	102	61	80	43.4	48.5	114.8	116.9	99.8	120.9	44.4	38.6	40.6	57.4	83.5	100.2	81.9	85	76.9	-0.3829	0.1462	0.6236
hsa-miR-106a-5p	8	4	2	10	7	6	5	33	1	6	7	8	8	6	8.3	3.7	2.8	7.4	5.5	4.4	5.2	36.4	1.1	3.8	8.5	7.9	10.7	6.4	8	0.5216	0.1463	0.6236
hsa-let-7a-5p	21658	30403	17065	30748	23164	29010	20133	20880	17289	32678	13732	20683	15449	19543	22405.5	27803.6	23597.2	22605.6	18353.9	21252.5	20807.9	23039.9	18982.3	20833.3	16612	20324.3	20734.3	20766.4	21294.2	-0.1582	0.1465	0.6236
hsa-miR-30a-3p	732	1585	838	1962	1178	1314	976	851	1012	1196	858	822	731	846	757.3	1449.5	1158.8	1442.4	933.4	962.6	1008.7	939	1111.1	762.5	1037.9	807.7	981.1	899	1017.9	-0.2324	0.1467	0.6236
hsa-miR-374b-5p	633	553	301	714	837	961	397	419	645	765	492	345	286	408	654.8	505.7	416.2	524.9	663.2	704	410.3	462.3	708.2	487.7	595.2	339	383.8	433.5	520.6	-0.2594	0.1477	0.6236
hsa-miR-363-3p	49	21	40	121	57	42	74	233	57	60	45	37	39	36	50.7	19.2	55.3	89	45.2	30.8	76.5	257.1	62.6	38.3	54.4	36.4	52.3	38.3	64.7	0.4768	0.1494	0.6237
hsa-miR-379-3p	15	10	5	6	12	13	9	4	5	8	6	7	2	7	15.5	9.1	6.9	4.4	9.5	9.5	9.3	4.4	5.5	5.1	7.3	6.9	2.7	7.4	7.4	-0.4449	0.1517	0.6239
hsa-miR-181c-5p	181	168	100	176	223	335	121	103	42	124	131	147	169	133	187.2	153.6	138.3	129.4	176.7	245.4	125.1	113.7	46.1	79.1	158.5	144.5	226.8	141.3	147.5	-0.3581	0.1529	0.6239
hsa-miR-221-3p	433	1167	772	1597	926	960	1027	1087	941	1215	641	1731	1002	862	447.9	1067.2	1067.5	1174.1	733.7	703.3	1061.4	1199.4	1033.2	774.6	775.4	1701	1344.8	916	1000	0.3117	0.1567	0.6312
hsa-miR-4521	4	7	7	10	10	13	11	1	7	5	4	5	2	1	4.1	6.4	9.7	7.4	7.9	9.5	11.4	1.1	7.7	3.2	4.8	4.9	2.7	1.1	5.8	-0.4798	0.1598	0.6312
hsa-miR-433-3p	9	17	9	14	9	15	5	2	5	17	5	17	2	6	9.3	15.5	12.4	10.3	7.1	11	5.2	2.2	5.5	10.8	6	16.7	2.7	6.4	8.7	-0.4513	0.16	0.6312
hsa-miR-424-5p	14	22	10	17	30	33	17	25	26	54	29	10	14	24	14.5	20.1	13.8	12.5	23.8	24.2	17.6	27.6	28.5	34.4	35.1	9.8	18.8	25.5	21.9	0.3687	0.1625	0.6342
hsa-miR-628-3p	16	20	10	42	26	16	0	17	11	22	14	15	10	11	16.6	18.3	13.8	30.9	20.6	11.7	0	18.8	12.1	14	16.9	14.7	13.4	11.7	15.3	-0.4315	0.1659	0.6403
hsa-miR-125b-1-3p	37	34	65	123	71	55	27	17	28	74	49	59	32	50	38.3	31.1	89.9	90.4	56.3	40.3	27.9	18.8	30.7	47.2	59.3	58	42.9	53.1	48.9	-0.3722	0.1699	0.6487
hsa-miR-330-3p	15	30	20	17	29	20	48	19	24	25	20	35	13	24	15.5	27.4	27.7	12.5	23	14.7	49.6	21	26.4	15.9	24.2	34.4	17.4	25.5	23.9	0.3609	0.1764	0.6665
hsa-miR-376a-3p	3	9	7	5	12	7	5	0	0	10	1	7	4	4	3.1	8.2	9.7	3.7	9.5	5.1	5.2	0	0	6.4	1.2	6.9	5.4	4.3	4.9	-0.4764	0.1843	0.6892
hsa-miR-411-5p	429	303	126	89	215	238	121	107	132	381	127	205	103	153	443.8	277.1	174.2	65.4	170.4	174.4	125.1	118.1	144.9	242.9	153.6	201.4	138.2	162.6	185.2	-0.3599	0.1886	0.6981
hsa-miR-331-5p	9	8	12	11	16	16	12	18	19	27	19	9	5	9	9.3	7.3	16.6	8.1	12.7	11.7	12.4	19.9	20.9	17.2	23	8.8	6.7	9.6	13.2	0.3738	0.1912	0.6983
hsa-miR-374b-3p	24	10	13	31	28	33	30	9	20	45	18	25	28	37	24.8	9.1	18	22.8	22.2	24.2	31	9.9	22	28.7	21.8	24.6	37.6	39.3	24	0.3426	0.193	0.6983
hsa-miR-652-3p	80	132	96	218	151	163	64	102	116	191	94	82	85	84	82.8	120.7	132.7	160.3	119.6	119.4	66.1	112.6	127.4	121.8	113.7	80.6	114.1	89.3	111.5	-0.2339	0.1969	0.6983
hsa-let-7f-1-3p	3	7	12	6	9	10	0	5	12	4	4	3	1	4	3.1	6.4	16.6	4.4	7.1	7.3	0	5.5	13.2	2.6	4.8	2.9	1.3	4.3	5.7	-0.4618	0.1979	0.6983
hsa-miR-4286	5	24	4	18	35	22	14	14	33	34	19	29	10	17	5.2	21.9	5.5	13.2	27.7	16.1	14.5	15.4	36.2	21.7	23	28.5	13.4	18.1	18.6	0.3846	0.2005	0.6983
hsa-miR-329-3p	52	73	15	21	34	24	8	12	32	55	11	41	17	11	53.8	66.8	20.7	15.4	26.9	17.6	8.3	13.2	35.1	35.1	13.3	40.3	22.8	11.7	27.2	-0.4148	0.2017	0.6983
hsa-miR-487b-3p	97	153	93	96	125	119	107	65	37	181	41	109	41	95	100.3	139.9	128.6	70.6	99	87.2	110.6	71.7	40.6	115.4	49.6	107.1	55	100.9	91.2	-0.305	0.2023	0.6983
hsa-miR-629-5p	11	8	6	17	14	19	1	43	22	24	13	7	10	11	11.4	7.3	8.3	12.5	11.1	13.9	1	47.4	24.2	15.3	15.7	6.9	13.4	11.7	14.3	0.4333	0.2067	0.7066
hsa-let-7b-3p	9	43	27	68	33	68	14	19	21	44	27	45	18	22	9.3	39.3	37.3	50	26.1	49.8	14.5	21	23.1	28.1	32.7	44.2	24.2	23.4	30.2	-0.3503	0.2114	0.7085
hsa-miR-151b	65	50	24	50	40	44	63	53	56	77	26	46	34	42	67.2	45.7	33.2	36.8	31.7	32.2	65.1	58.5	61.5	49.1	31.5	45.2	45.6	44.6	46.3	0.2653	0.2133	0.7085
hsa-miR-98-3p	5	9	4	4	7	6	0	0	2	7	7	4	3	2	5.2	8.2	5.5	2.9	5.5	4.4	0	0	2.2	4.5	8.5	3.9	4	2.1	4.1	-0.4456	0.2143	0.7085
hsa-miR-584-5p	9	10	2	11	4	4	3	26	20	13	5	6	3	2	9.3	9.1	2.8	8.1	3.2	2.9	3.1	28.7	22	8.3	6	5.9	4	2.1	8.3	0.446	0.2151	0.7085
hsa-let-7b-5p	1460	2449	2716	6027	2753	2975	1989	1878	1860	3983	1614	2680	1834	2101	1510.4	2239.6	3755.6	4431	2181.3	2179.5	2055.7	2072.3	2042.2	2539.3	1952.5	2633.5	2461.4	2232.5	2449.1	-0.2494	0.2206	0.7087
hsa-miR-135b-5p	6	3	0	0	1	6	0	4	0	15	16	8	1	2	6.2	2.7	0	0	0.8	4.4	0	4.4	0	9.6	19.4	7.9	1.3	2.1	4.2	0.4294	0.2221	0.7087
hsa-miR-504-5p	58	109	47	122	85	90	97	117	77	155	48	93	71	55	60	99.7	65	89.7	67.3	65.9	100.3	129.1	84.5	98.8	58.1	91.4	95.3	58.4	83.1	0.2402	0.2227	0.7087
hsa-miR-1301-3p	7	5	4	14	8	5	1	13	14	19	6	9	4	9	7.2	4.6	5.5	10.3	6.3	3.7	1	14.3	15.4	12.1	7.3	8.8	5.4	9.6	8	0.4024	0.2231	0.7087
hsa-miR-15b-5p	612	394	231	809	508	485	567	1940	456	441	384	342	321	291	633.1	360.3	319.4	594.8	402.5	355.3	586	2140.7	500.7	281.2	464.5	336.1	430.8	309.2	551	0.3802	0.229	0.721
hsa-miR-20a-3p	15	4	2	3	4	15	0	2	0	9	4	3	2	9	15.5	3.7	2.8	2.2	3.2	11	0	2.2	0	5.7	4.8	2.9	2.7	9.6	4.7	-0.4385	0.231	0.721
hsa-miR-200a-3p	4	2	1	5	4	4	0	3	8	9	7	6	4	1	4.1	1.8	1.4	3.7	3.2	2.9	0	3.3	8.8	5.7	8.5	5.9	5.4	1.1	4	0.4281	0.2342	0.7241
hsa-miR-379-5p	598	569	225	199	370	446	280	152	500	470	235	247	108	261	618.6	520.4	311.1	146.3	293.2	326.7	289.4	167.7	549	299.6	284.3	242.7	144.9	277.3	319.4	-0.3236	0.2377	0.7241
hsa-miR-361-3p	121	182	137	288	203	235	173	128	243	436	145	194	135	167	125.2	166.4	189.4	211.7	160.8	172.2	178.8	141.2	266.8	278	175.4	190.6	181.2	177.5	186.8	0.2063	0.238	0.7241
hsa-miR-200b-3p	11	3	4	8	5	11	9	10	12	18	4	9	6	3	11.4	2.7	5.5	5.9	4	8.1	9.3	11	13.2	11.5	4.8	8.8	8.1	3.2	7.7	0.3732	0.243	0.733
hsa-miR-1271-5p	9	12	14	16	25	9	5	8	0	9	11	17	8	10	9.3	11	19.4	11.8	19.8	6.6	5.2	8.8	0	5.7	13.3	16.7	10.7	10.6	10.6	-0.3858	0.2455	0.7343
hsa-miR-99a-3p	4	3	5	4	7	7	0	1	10	13	9	7	5	11	4.1	2.7	6.9	2.9	5.5	5.1	0	1.1	11	8.3	10.9	6.9	6.7	11.7	6	0.407	0.2495	0.7402
hsa-miR-3613-5p	361	350	87	118	209	212	286	267	196	434	259	161	212	221	373.5	320.1	120.3	86.8	165.6	155.3	295.6	294.6	215.2	276.7	313.3	158.2	284.5	234.8	235.3	0.297	0.2524	0.7426
hsa-miR-301a-3p	6	7	3	5	13	18	0	1	0	2	11	4	4	9	6.2	6.4	4.1	3.7	10.3	13.2	0	1.1	0	1.3	13.3	3.9	5.4	9.6	5.6	-0.4151	0.2568	0.7495
hsa-let-7i-5p	7416	8817	5552	9741	7416	7931	9518	9264	9392	13564	5118	5546	4768	7146	7671.9	8063.2	7677.2	7161.5	5876	5810.2	9837.1	10222.3	10311.9	8647.5	6191.4	5449.8	6399.2	7593.3	7636.6	0.1873	0.2678	0.7754
hsa-miR-335-5p	639	177	87	120	334	645	445	228	304	441	1051	396	130	231	661.1	161.9	120.3	88.2	264.6	472.5	459.9	251.6	333.8	281.2	1271.4	389.1	174.5	245.5	369.7	0.3664	0.2782	0.7957
hsa-miR-199a-5p	2840	3483	2433	5772	4634	5623	2687	2675	2628	6529	2955	5973	4517	5191	2938	3185.2	3364.3	4243.5	3671.7	4119.4	2777.1	2951.7	2885.4	4162.5	3574.7	5869.4	6062.3	5516	3951.5	0.2166	0.2819	0.7957
hsa-miR-140-5p	5214	4684	2399	3843	8686	7471	1970	2639	1057	5434	4366	4133	3062	6020	5393.9	4283.5	3317.3	2825.3	6882.3	5473.2	2036	2912	1160.5	3464.4	5281.7	4061.3	4109.6	6396.9	4114.1	-0.2938	0.2826	0.7957
hsa-miR-134-5p	45	55	26	38	37	41	41	15	55	68	40	71	25	43	46.6	50.3	36	27.9	29.3	30	42.4	16.6	60.4	43.4	48.4	69.8	33.6	45.7	41.4	0.2645	0.2837	0.7957
hsa-miR-106b-3p	39	87	41	154	68	73	58	261	56	66	51	69	41	36	40.3	79.6	56.7	113.2	53.9	53.5	59.9	288	61.5	42.1	61.7	67.8	55	38.3	60.1	-0.2352	0.2891	0.8045
hsa-miR-548e-3p	4	2	5	3	2	4	7	16	7	1	4	3	2	0	4.1	1.8	6.9	2.2	1.6	2.9	7.2	17.7	7.7	0.6	4.8	2.9	2.7	0	4.5	0.3837	0.2947	0.8123
hsa-let-7a-3p	32	53	34	41	55	70	58	38	54	76	42	41	27	49	33.1	48.5	47	30.1	43.6	51.3	59.9	41.9	59.3	48.5	50.8	40.3	36.2	52.1	45.9	0.1931	0.3003	0.8123
hsa-miR-497-5p	290	338	223	330	528	592	235	312	189	371	412	495	471	603	300	309.1	308.4	242.6	418.4	433.7	242.9	344.3	207.5	236.5	498.4	486.4	632.1	640.7	378.6	0.2537	0.306	0.8123
hsa-miR-24-1-5p	143	118	86	132	136	123	44	92	60	111	86	111	114	98	147.9	107.9	118.9	97	107.8	90.1	45.5	101.5	65.9	70.8	104	109.1	153	104.1	101.7	-0.2222	0.3112	0.8123
hsa-miR-26b-3p	6	7	13	14	11	13	4	7	0	19	7	9	4	8	6.2	6.4	18	10.3	8.7	9.5	4.1	7.7	0	12.1	8.5	8.8	5.4	8.5	8.2	-0.3327	0.3115	0.8123
hsa-miR-130b-3p	8	16	7	16	19	16	2	8	6	14	11	14	11	6	8.3	14.6	9.7	11.8	15.1	11.7	2.1	8.8	6.6	8.9	13.3	13.8	14.8	6.4	10.4	-0.2979	0.3135	0.8123
hsa-miR-181c-3p	8	11	2	10	13	23	28	22	1	12	7	7	17	9	8.3	10.1	2.8	7.4	10.3	16.8	28.9	24.3	1.1	7.7	8.5	6.9	22.8	9.6	11.8	0.3468	0.32	0.8123
hsa-miR-25-3p	673	650	647	1478	628	759	974	3156	709	831	560	421	418	365	696.2	594.4	894.7	1086.6	497.6	556	1006.7	3482.5	778.4	529.8	677.4	413.7	561	387.8	868.8	0.3219	0.3229	0.8123
hsa-miR-146b-3p	8	8	8	12	20	9	7	18	13	29	9	13	3	10	8.3	7.3	11.1	8.8	15.8	6.6	7.2	19.9	14.3	18.5	10.9	12.8	4	10.6	11.1	0.2954	0.3233	0.8123
hsa-miR-323b-3p	6	4	5	4	8	1	7	1	4	3	1	4	0	2	6.2	3.7	6.9	2.9	6.3	0.7	7.2	1.1	4.4	1.9	1.2	3.9	0	2.1	3.5	-0.3585	0.3246	0.8123
hsa-miR-92a-3p	2919	2772	2136	4356	3534	3115	2398	4299	1444	3893	1646	1975	1546	1770	3019.7	2535	2953.6	3202.5	2800.2	2282	2478.4	4743.7	1585.4	2481.9	1991.2	1940.8	2074.9	1880.8	2569.3	-0.2036	0.3282	0.8123
hsa-miR-342-5p	1	5	2	4	4	6	0	2	4	10	2	11	4	6	1	4.6	2.8	2.9	3.2	4.4	0	2.2	4.4	6.4	2.4	10.8	5.4	6.4	4.1	0.35	0.3303	0.8123
hsa-miR-452-5p	16	19	16	14	30	56	31	18	18	19	62	21	13	35	16.6	17.4	22.1	10.3	23.8	41	32	19.9	19.8	12.1	75	20.6	17.4	37.2	26.1	0.3072	0.3311	0.8123
hsa-miR-424-3p	0	2	2	8	1	1	0	8	2	17	5	1	1	0	0	1.8	2.8	5.9	0.8	0.7	0	8.8	2.2	10.8	6	1	1.3	0	3	0.3433	0.333	0.8123
hsa-miR-19a-3p	22	14	8	13	22	45	17	69	15	20	15	9	14	26	22.8	12.8	11.1	9.6	17.4	33	17.6	76.1	16.5	12.8	18.1	8.8	18.8	27.6	21.6	0.3215	0.3333	0.8123
hsa-miR-323a-3p	8	18	3	5	6	14	23	0	25	26	4	6	6	8	8.3	16.5	4.1	3.7	4.8	10.3	23.8	0	27.4	16.6	4.8	5.9	8.1	8.5	10.2	0.3467	0.3352	0.8123
hsa-miR-30c-2-3p	23	37	24	47	31	39	20	9	31	46	23	36	18	15	23.8	33.8	33.2	34.6	24.6	28.6	20.7	9.9	34	29.3	27.8	35.4	24.2	15.9	26.8	-0.2306	0.3358	0.8123
hsa-miR-299-5p	4	17	5	0	7	12	0	3	2	16	2	5	3	6	4.1	15.5	6.9	0	5.5	8.8	0	3.3	2.2	10.2	2.4	4.9	4	6.4	5.3	-0.3515	0.3366	0.8123
hsa-miR-320c	19	25	8	16	14	14	7	6	24	21	18	25	17	24	19.7	22.9	11.1	11.8	11.1	10.3	7.2	6.6	26.4	13.4	21.8	24.6	22.8	25.5	16.8	0.2816	0.3419	0.8123
hsa-miR-148b-5p	14	10	12	14	16	22	8	3	1	15	17	14	8	12	14.5	9.1	16.6	10.3	12.7	16.1	8.3	3.3	1.1	9.6	20.6	13.8	10.7	12.8	11.4	-0.3003	0.3428	0.8123
hsa-miR-451a	13621	3667	4604	19009	5254	4897	13250	60775	3136	2278	7488	1438	5736	1703	14091.1	3353.5	6366.3	13975.2	4163	3587.5	13694.2	67061.7	3443.1	1452.3	9058.4	1413.1	7698.4	1809.6	10797.7	0.3445	0.3431	0.8123
hsa-miR-369-5p	26	16	15	12	18	16	16	0	18	56	20	44	5	33	26.9	14.6	20.7	8.8	14.3	11.7	16.5	0	19.8	35.7	24.2	43.2	6.7	35.1	19.9	0.3276	0.3481	0.8123
hsa-miR-183-5p	25	7	33	60	13	11	6	185	19	10	23	6	21	8	25.9	6.4	45.6	44.1	10.3	8.1	6.2	204.1	20.9	6.4	27.8	5.9	28.2	8.5	32	0.343	0.3487	0.8123
hsa-miR-324-5p	24	49	34	91	61	61	52	35	47	33	27	38	29	39	24.8	44.8	47	66.9	48.3	44.7	53.7	38.6	51.6	21	32.7	37.3	38.9	41.4	42.3	-0.2137	0.35	0.8123
hsa-miR-135a-5p	1	1	0	5	6	4	4	0	0	3	9	1	4	9	1	0.9	0	3.7	4.8	2.9	4.1	0	0	1.9	10.9	1	5.4	9.6	3.3	0.3354	0.3538	0.8123
hsa-miR-197-3p	123	207	128	347	267	237	137	167	182	307	120	154	133	155	127.2	189.3	177	255.1	211.6	173.6	141.6	184.3	199.8	195.7	145.2	151.3	178.5	164.7	178.2	-0.1463	0.3571	0.8123
hsa-miR-199a-3p	7796	9602	4626	9419	6474	7370	8001	6938	10646	8740	5872	6379	5700	6517	8065.1	8781	6396.7	6924.8	5129.7	5399.2	8269.2	7655.7	11688.7	5572	7103.5	6268.4	7650.1	6925	7273.5	0.1615	0.3571	0.8123
hsa-miR-199b-3p	3897	4798	2313	4709	3236	3683	3999	3468	5323	4369	2936	3189	2849	3258	4031.5	4387.8	3198.4	3462	2564	2698.1	4133.1	3826.7	5844.3	2785.4	3551.8	3133.7	3823.7	3462	3635.9	0.1616	0.3571	0.8123
hsa-miR-30c-1-3p	2	1	5	2	4	3	0	3	8	10	1	5	3	3	2.1	0.9	6.9	1.5	3.2	2.2	0	3.3	8.8	6.4	1.2	4.9	4	3.2	3.5	0.3311	0.3636	0.8123
hsa-miR-1247-5p	2	1	0	0	5	8	0	1	5	19	3	4	2	1	2.1	0.9	0	0	4	5.9	0	1.1	5.5	12.1	3.6	3.9	2.7	1.1	3.1	0.3238	0.368	0.8123
hsa-miR-382-3p	66	90	22	19	47	43	45	6	41	57	24	52	15	33	68.3	82.3	30.4	14	37.2	31.5	46.5	6.6	45	36.3	29	51.1	20.1	35.1	38.1	-0.2821	0.3733	0.8123
hsa-miR-224-3p	1	0	2	8	5	5	7	4	1	8	6	5	1	3	1	0	2.8	5.9	4	3.7	7.2	4.4	1.1	5.1	7.3	4.9	1.3	3.2	3.7	0.3192	0.3773	0.8123
hsa-miR-185-5p	106	112	76	146	121	117	123	325	91	105	98	94	46	74	109.7	102.4	105.1	107.3	95.9	85.7	127.1	358.6	99.9	66.9	118.6	92.4	61.7	78.6	115	0.2531	0.3779	0.8123
hsa-miR-192-5p	50	31	24	62	60	66	63	130	32	43	39	32	40	24	51.7	28.3	33.2	45.6	47.5	48.4	65.1	143.4	35.1	27.4	47.2	31.4	53.7	25.5	48.8	0.261	0.3792	0.8123
hsa-miR-210-3p	13	78	24	33	49	46	36	62	12	27	13	16	22	24	13.4	71.3	33.2	24.3	38.8	33.7	37.2	68.4	13.2	17.2	15.7	15.7	29.5	25.5	31.2	-0.2776	0.3806	0.8123
hsa-miR-450b-5p	11	13	3	3	10	12	7	8	16	35	4	5	7	6	11.4	11.9	4.1	2.2	7.9	8.8	7.2	8.8	17.6	22.3	4.8	4.9	9.4	6.4	9.1	0.2945	0.3821	0.8123
hsa-miR-1180-3p	5	6	5	18	5	5	5	2	5	28	5	10	7	11	5.2	5.5	6.9	13.2	4	3.7	5.2	2.2	5.5	17.9	6	9.8	9.4	11.7	7.6	0.2949	0.3837	0.8123
hsa-miR-3613-3p	2	3	3	8	2	3	8	6	9	3	1	1	1	6	2.1	2.7	4.1	5.9	1.6	2.2	8.3	6.6	9.9	1.9	1.2	1	1.3	6.4	3.9	0.3123	0.3897	0.8123
hsa-miR-484	353	270	132	384	255	273	319	432	299	330	222	241	149	206	365.2	246.9	182.5	282.3	202	200	329.7	476.7	328.3	210.4	268.6	236.8	200	218.9	267.7	0.1829	0.3909	0.8123
hsa-miR-20a-5p	160	120	86	244	199	230	194	455	108	174	114	100	138	114	165.5	109.7	118.9	179.4	157.7	168.5	200.5	502.1	118.6	110.9	137.9	98.3	185.2	121.1	169.6	0.2414	0.3933	0.8123
hsa-miR-93-3p	7	12	10	30	15	17	7	15	14	13	4	14	9	7	7.2	11	13.8	22.1	11.9	12.5	7.2	16.6	15.4	8.3	4.8	13.8	12.1	7.4	11.7	-0.2479	0.3955	0.8123
hsa-miR-369-3p	179	253	70	53	123	146	126	95	126	197	83	65	54	90	185.2	231.4	96.8	39	97.5	107	130.2	104.8	138.3	125.6	100.4	63.9	72.5	95.6	113.4	-0.2304	0.3992	0.8123
hsa-let-7f-5p	26372	24956	11716	19492	21460	27606	21176	20001	17494	24174	12535	12786	12945	16667	27282.2	22822.3	16200.7	14330.3	17003.8	20223.9	21885.9	22070	19207.4	15411.7	15163.9	12564.3	17373.7	17710.4	18517.9	-0.1437	0.4004	0.8123
hsa-miR-2110	4	6	2	8	3	6	0	11	5	11	4	7	3	5	4.1	5.5	2.8	5.9	2.4	4.4	0	12.1	5.5	7	4.8	6.9	4	5.3	5.1	0.292	0.4004	0.8123
hsa-miR-127-5p	39	40	12	14	21	24	39	31	46	38	21	17	9	23	40.3	36.6	16.6	10.3	16.6	17.6	40.3	34.2	50.5	24.2	25.4	16.7	12.1	24.4	26.1	0.2499	0.401	0.8123
hsa-miR-941	7	10	8	10	13	15	5	17	17	24	7	10	5	8	7.2	9.1	11.1	7.4	10.3	11	5.2	18.8	18.7	15.3	8.5	9.8	6.7	8.5	10.5	0.2469	0.4025	0.8123
hsa-miR-320d	21	20	12	20	16	14	16	7	33	22	13	17	15	23	21.7	18.3	16.6	14.7	12.7	10.3	16.5	7.7	36.2	14	15.7	16.7	20.1	24.4	17.6	0.2295	0.4051	0.8123
hsa-miR-296-5p	1	5	1	6	10	10	0	0	7	4	4	5	1	3	1	4.6	1.4	4.4	7.9	7.3	0	0	7.7	2.6	4.8	4.9	1.3	3.2	3.7	-0.3041	0.4058	0.8123
hsa-miR-15a-5p	213	146	136	251	300	425	140	438	148	220	267	210	207	264	220.4	133.5	188.1	184.5	237.7	311.4	144.7	483.3	162.5	140.3	323	206.4	277.8	280.5	235.3	0.2104	0.407	0.8123
hsa-miR-505-3p	19	44	41	56	59	57	33	46	33	125	31	68	32	31	19.7	40.2	56.7	41.2	46.7	41.8	34.1	50.8	36.2	79.7	37.5	66.8	42.9	32.9	44.8	0.2005	0.4115	0.8123
hsa-miR-500a-5p	2	3	2	6	6	2	2	8	4	5	4	6	3	1	2.1	2.7	2.8	4.4	4.8	1.5	2.1	8.8	4.4	3.2	4.8	5.9	4	1.1	3.8	0.291	0.4117	0.8123
hsa-miR-500b-5p	2	3	2	6	6	2	2	8	4	5	4	6	3	1	2.1	2.7	2.8	4.4	4.8	1.5	2.1	8.8	4.4	3.2	4.8	5.9	4	1.1	3.8	0.291	0.4117	0.8123
hsa-miR-29b-2-5p	8	30	16	34	38	42	9	41	4	17	15	22	19	16	8.3	27.4	22.1	25	30.1	30.8	9.3	45.2	4.4	10.8	18.1	21.6	25.5	17	21.1	-0.261	0.4139	0.8123
hsa-miR-23b-3p	10926	14996	11310	24963	19162	20190	10084	9668	7976	24030	8926	18557	13226	13483	11303.1	13713.9	15639.3	18352.6	15182.9	14791	10422.1	10668.1	8757.2	15319.9	10798	18235.2	17750.8	14327.1	13947.2	-0.1483	0.4141	0.8123
hsa-miR-99b-3p	37	76	33	99	46	63	55	54	48	66	31	46	23	35	38.3	69.5	45.6	72.8	36.4	46.2	56.8	59.6	52.7	42.1	37.5	45.2	30.9	37.2	47.9	-0.1709	0.4212	0.8196
hsa-miR-22-3p	6644	6920	5907	9561	10283	13029	3334	4093	5906	8443	8194	7143	5896	8867	6873.3	6328.4	8168.1	7029.2	8147.7	9544.9	3445.8	4516.4	6484.4	5382.7	9912.5	7019.1	7913.1	9422.1	7156.3	-0.1675	0.4242	0.8196
hsa-miR-365a-3p	242	247	326	678	434	550	167	130	328	382	376	366	288	342	250.4	225.9	450.8	498.5	343.9	402.9	172.6	143.4	360.1	243.5	454.9	359.7	386.5	363.4	332.6	-0.1941	0.4269	0.8196
hsa-miR-365b-3p	242	247	326	678	434	550	167	130	328	382	376	366	288	342	250.4	225.9	450.8	498.5	343.9	402.9	172.6	143.4	360.1	243.5	454.9	359.7	386.5	363.4	332.6	-0.1941	0.4269	0.8196
hsa-miR-136-3p	182	185	70	66	159	183	67	37	63	149	145	140	83	137	188.3	169.2	96.8	48.5	126	134.1	69.2	40.8	69.2	95	175.4	137.6	111.4	145.6	114.8	-0.2214	0.4294	0.82
hsa-miR-1260a	30	36	0	2	0	1	16	14	0	0	0	1	0	1	31	32.9	0	1.5	0	0.7	16.5	15.4	0	0	0	1	0	1.1	7.2	-0.2034	0.434	0.8243
hsa-miR-3615	12	4	11	32	3	13	6	11	0	27	11	4	3	6	12.4	3.7	15.2	23.5	2.4	9.5	6.2	12.1	0	17.2	13.3	3.9	4	6.4	9.3	-0.2787	0.4393	0.826
hsa-miR-874-3p	15	33	19	34	35	37	19	14	17	52	35	48	24	26	15.5	30.2	26.3	25	27.7	27.1	19.6	15.4	18.7	33.2	42.3	47.2	32.2	27.6	27.7	0.1918	0.4417	0.826
hsa-miR-218-5p	760	544	349	708	933	984	726	685	745	1171	634	503	386	601	786.2	497.5	482.6	520.5	739.3	720.9	750.3	755.9	818	746.6	767	494.3	518.1	638.6	659.7	0.1279	0.4418	0.826
hsa-miR-494-3p	46	66	30	32	59	49	18	8	19	100	28	58	28	35	47.6	60.4	41.5	23.5	46.7	35.9	18.6	8.8	20.9	63.8	33.9	57	37.6	37.2	38.1	-0.2254	0.4457	0.8291
hsa-miR-664a-5p	10	22	17	24	12	16	0	7	17	17	13	15	7	19	10.3	20.1	23.5	17.6	9.5	11.7	0	7.7	18.7	10.8	15.7	14.7	9.4	20.2	13.6	-0.2451	0.453	0.8319
hsa-miR-3913-5p	2	10	2	2	5	6	0	0	1	8	4	4	2	4	2.1	9.1	2.8	1.5	4	4.4	0	0	1.1	5.1	4.8	3.9	2.7	4.3	3.3	-0.2718	0.4573	0.8319
hsa-miR-195-3p	37	44	45	54	26	28	38	22	53	66	26	38	46	42	38.3	40.2	62.2	39.7	20.6	20.5	39.3	24.3	58.2	42.1	31.5	37.3	61.7	44.6	40	0.1861	0.4594	0.8319
hsa-miR-107	72	97	65	138	101	120	50	109	84	97	90	119	97	94	74.5	88.7	89.9	101.5	80	87.9	51.7	120.3	92.2	61.8	108.9	116.9	130.2	99.9	93.2	0.1463	0.4624	0.8319
hsa-miR-148b-3p	1154	1541	555	929	1399	1822	1136	1052	1232	1607	1028	1026	908	1218	1193.8	1409.2	767.4	683	1108.5	1334.8	1174.1	1160.8	1352.7	1024.5	1243.6	1008.2	1218.6	1294.2	1141	0.1219	0.4636	0.8319
hsa-miR-23a-3p	9662	23219	14748	32069	22031	25968	12830	12091	12236	27402	11228	22441	16469	17594	9995.5	21233.8	20393.3	23576.8	17456.2	19023.9	13260.1	13341.7	13434.4	17469.7	13582.8	22051.9	22103.3	18695.4	17544.2	-0.1413	0.4642	0.8319
hsa-miR-30e-5p	4873	3564	1877	3592	5614	6532	5105	5579	2608	5175	3865	3318	3278	3838	5041.2	3259.3	2595.5	2640.8	4448.2	4785.3	5276.1	6156.1	2863.4	3299.2	4675.6	3260.5	4399.5	4078.3	4055.6	0.1496	0.4647	0.8319
hsa-miR-144-5p	683	89	146	430	181	146	420	3415	107	17	270	28	243	38	706.6	81.4	201.9	316.1	143.4	107	434.1	3768.3	117.5	10.8	326.6	27.5	326.1	40.4	217.7	-0.2654	0.466	0.8319
hsa-miR-32-5p	40	18	12	22	28	29	23	23	8	50	44	17	24	21	41.4	16.5	16.6	16.2	22.2	21.2	23.8	25.4	8.8	31.9	53.2	16.7	32.2	22.3	24.9	0.2099	0.4685	0.8319
hsa-miR-330-5p	3	3	9	9	14	6	5	3	3	14	4	2	5	6	3.1	2.7	12.4	6.6	11.1	4.4	5.2	3.3	3.3	8.9	4.8	2	6.7	6.4	5.8	-0.2462	0.4704	0.8319
hsa-miR-145-3p	348	761	555	863	650	780	457	441	765	856	482	394	356	450	360	695.9	767.4	634.5	515	571.4	472.3	486.6	839.9	545.7	583.1	387.2	477.8	478.2	558.2	-0.135	0.4767	0.8363
hsa-miR-326	3	6	17	28	17	14	23	3	22	22	21	9	10	14	3.1	5.5	23.5	20.6	13.5	10.3	23.8	3.3	24.2	14	25.4	8.8	13.4	14.9	14.6	0.2354	0.4797	0.8363
hsa-miR-21-3p	93	179	64	83	108	145	108	111	61	151	54	134	150	116	96.2	163.7	88.5	61	85.6	106.2	111.6	122.5	67	96.3	65.3	131.7	201.3	123.3	108.6	0.1705	0.4827	0.8363
hsa-miR-151a-3p	1169	1316	900	1577	1263	1449	1352	1310	1839	1716	771	1088	789	936	1209.3	1203.5	1244.5	1159.4	1000.7	1061.5	1397.3	1445.5	2019.1	1094	932.7	1069.1	1058.9	994.6	1206.4	0.1193	0.4843	0.8363
hsa-miR-485-5p	6	2	5	5	5	2	8	0	3	6	6	12	2	4	6.2	1.8	6.9	3.7	4	1.5	8.3	0	3.3	3.8	7.3	11.8	2.7	4.3	4.7	0.2511	0.4845	0.8363
hsa-miR-93-5p	292	260	309	1032	489	509	432	1152	239	503	321	412	378	311	302.1	237.8	427.3	758.7	387.5	372.9	446.5	1271.2	262.4	320.7	388.3	404.9	507.3	330.5	458.4	0.1989	0.488	0.8373
hsa-miR-151a-5p	2003	1882	1042	1698	1292	1506	1753	1532	1654	2227	924	1762	1172	1288	2072.1	1721.1	1440.9	1248.4	1023.7	1103.3	1811.8	1690.5	1816	1419.8	1117.8	1731.4	1573	1368.6	1509.9	0.1191	0.4921	0.8373
hsa-miR-27a-5p	42	103	39	52	86	44	38	68	47	37	26	72	41	30	43.4	94.2	53.9	38.2	68.1	32.2	39.3	75	51.6	23.6	31.5	70.8	55	31.9	50.6	-0.1848	0.4928	0.8373
hsa-miR-425-5p	365	368	168	399	190	248	323	827	284	320	120	254	148	154	377.6	336.5	232.3	293.3	150.5	181.7	333.8	912.5	311.8	204	145.2	249.6	198.6	163.6	292.2	0.2071	0.4945	0.8373
hsa-miR-493-5p	102	209	88	124	138	122	94	65	191	200	69	94	41	80	105.5	191.1	121.7	91.2	109.3	89.4	97.2	71.7	209.7	127.5	83.5	92.4	55	85	109.3	-0.1695	0.4984	0.84
hsa-miR-495-3p	46	76	32	48	67	66	44	25	45	85	37	64	21	40	47.6	69.5	44.2	35.3	53.1	48.4	45.5	27.6	49.4	54.2	44.8	62.9	28.2	42.5	46.6	-0.1383	0.5113	0.8554
hsa-miR-20b-5p	6	5	9	8	5	7	5	30	6	5	4	3	2	7	6.2	4.6	12.4	5.9	4	5.1	5.2	33.1	6.6	3.2	4.8	2.9	2.7	7.4	7.4	0.2353	0.5123	0.8554
hsa-miR-195-5p	2512	2197	1985	2945	3148	3283	1592	1636	1992	4206	2444	2880	2771	2914	2598.7	2009.2	2744.8	2165.1	2494.3	2405.1	1645.4	1805.2	2187.1	2681.5	2956.6	2830.1	3719	3096.4	2524.2	0.1146	0.5165	0.8585
hsa-miR-26b-5p	9848	11612	5213	10093	11602	13908	9139	8249	5639	13012	7611	7191	7614	8364	10187.9	10619.2	7208.4	7420.3	9192.8	10188.9	9445.4	9102.3	6191.3	8295.6	9207.2	7066.3	10218.9	8887.6	8802.3	-0.0917	0.5197	0.8598
hsa-miR-96-5p	4	0	7	12	0	7	1	35	3	1	4	0	5	3	4.1	0	9.7	8.8	0	5.1	1	38.6	3.3	0.6	4.8	0	6.7	3.2	6.1	0.2205	0.5257	0.8622
hsa-miR-186-5p	2192	2211	928	2054	1713	1845	2791	2820	1974	1900	1318	1159	1014	1161	2267.7	2022	1283.2	1510.1	1357.3	1351.6	2884.6	3111.7	2167.3	1211.3	1594.4	1138.9	1360.9	1233.7	1749.6	0.1506	0.5282	0.8622
hsa-miR-181a-2-3p	50	68	42	114	62	59	44	34	68	113	41	84	63	64	51.7	62.2	58.1	83.8	49.1	43.2	45.5	37.5	74.7	72	49.6	82.5	84.6	68	61.6	0.134	0.5285	0.8622
hsa-miR-7-1-3p	9	8	7	8	4	17	19	8	4	15	5	6	9	9	9.3	7.3	9.7	5.9	3.2	12.5	19.6	8.8	4.4	9.6	6	5.9	12.1	9.6	8.8	0.1992	0.5308	0.8622
hsa-miR-130a-3p	130	130	129	298	267	288	34	132	147	231	191	183	126	179	134.5	118.9	178.4	219.1	211.6	211	35.1	145.7	161.4	147.3	231.1	179.8	169.1	190.2	166.6	-0.1587	0.5414	0.8706
hsa-let-7e-3p	7	19	15	44	40	17	49	6	14	27	11	14	7	6	7.2	17.4	20.7	32.3	31.7	12.5	50.6	6.6	15.4	17.2	13.3	13.8	9.4	6.4	18.2	-0.2041	0.5432	0.8706
hsa-miR-320e	14	7	6	10	11	8	12	3	5	8	6	6	8	7	14.5	6.4	8.3	7.4	8.7	5.9	12.4	3.3	5.5	5.1	7.3	5.9	10.7	7.4	7.8	-0.1879	0.5432	0.8706
hsa-miR-345-5p	22	23	28	35	44	44	39	16	20	54	45	30	35	18	22.8	21	38.7	25.7	34.9	32.2	40.3	17.7	22	34.4	54.4	29.5	47	19.1	31.4	0.1521	0.547	0.8728
hsa-miR-125a-3p	6	8	3	13	14	10	0	10	2	18	6	5	3	8	6.2	7.3	4.1	9.6	11.1	7.3	0	11	2.2	11.5	7.3	4.9	4	8.5	6.8	-0.2012	0.5578	0.8783
hsa-miR-12136	6	5	10	13	22	12	0	5	27	12	22	8	9	12	6.2	4.6	13.8	9.6	17.4	8.8	0	5.5	29.6	7.7	26.6	7.9	12.1	12.8	11.6	0.2071	0.5598	0.8783
hsa-miR-532-5p	162	268	119	301	239	224	312	186	324	246	172	175	99	136	167.6	245.1	164.6	221.3	189.4	164.1	322.5	205.2	355.7	156.8	208.1	172	132.9	144.5	203.5	0.1287	0.56	0.8783
hsa-miR-493-3p	39	51	20	27	45	26	42	19	43	39	30	47	24	29	40.3	46.6	27.7	19.9	35.7	19	43.4	21	47.2	24.9	36.3	46.2	32.2	30.8	33.7	0.1427	0.5603	0.8783
hsa-miR-582-5p	6	1	3	8	10	34	3	4	8	12	6	7	1	13	6.2	0.9	4.1	5.9	7.9	24.9	3.1	4.4	8.8	7.7	7.3	6.9	1.3	13.8	7.4	-0.2062	0.5653	0.8824
hsa-miR-152-3p	1478	2668	1145	2210	2226	2863	1879	1540	2125	2169	1617	2171	1438	2151	1529	2439.9	1583.3	1624.8	1763.8	2097.4	1942	1699.3	2333.1	1382.8	1956.1	2133.4	1930	2285.7	1907.2	0.0853	0.5686	0.8837
hsa-miR-499a-5p	32	17	8	8	26	17	15	11	2	22	16	15	14	14	33.1	15.5	11.1	5.9	20.6	12.5	15.5	12.1	2.2	14	19.4	14.7	18.8	14.9	15	-0.1775	0.573	0.8839
hsa-miR-181a-5p	967	1156	1506	2375	1970	1603	1593	1158	1128	2288	1062	1356	924	1166	1000.4	1057.2	2082.5	1746.1	1560.9	1174.3	1646.4	1277.8	1238.5	1458.7	1284.7	1332.5	1240.1	1239	1381.4	-0.0947	0.5743	0.8839
hsa-miR-191-5p	723	806	958	1818	1449	1560	618	788	502	1751	795	1403	971	956	748	737.1	1324.7	1336.6	1148.1	1142.8	638.7	869.5	551.2	1116.3	961.7	1378.7	1303.2	1015.8	1019.5	-0.1192	0.5761	0.8839
hsa-miR-125a-5p	3564	4829	2593	5410	3952	3888	3770	2959	1677	10782	1687	6048	3248	3601	3687	4416.1	3585.6	3977.4	3131.4	2848.3	3896.4	3265.1	1841.2	6873.9	2040.8	5943.1	4359.2	3826.4	3835.1	0.1324	0.5837	0.8909
hsa-miR-338-5p	32	12	17	8	20	13	19	4	86	15	12	8	5	9	33.1	11	23.5	5.9	15.8	9.5	19.6	4.4	94.4	9.6	14.5	7.9	6.7	9.6	19	0.1976	0.5857	0.8909
hsa-miR-31-5p	1	5	6	21	12	15	7	13	4	32	20	4	2	5	1	4.6	8.3	15.4	9.5	11	7.2	14.3	4.4	20.4	24.2	3.9	2.7	5.3	9.5	0.1897	0.5941	0.8927
hsa-miR-744-3p	2	3	3	3	7	6	2	0	5	1	5	3	2	3	2.1	2.7	4.1	2.2	5.5	4.4	2.1	0	5.5	0.6	6	2.9	2.7	3.2	3.2	-0.1928	0.5949	0.8927
hsa-miR-421	9	10	25	45	33	40	17	18	13	46	14	31	11	20	9.3	9.1	34.6	33.1	26.1	29.3	17.6	19.9	14.3	29.3	16.9	30.5	14.8	21.3	21.9	-0.1507	0.5969	0.8927
hsa-miR-887-3p	6	4	8	14	17	17	0	1	3	10	17	9	4	15	6.2	3.7	11.1	10.3	13.5	12.5	0	1.1	3.3	6.4	20.6	8.8	5.4	15.9	8.5	-0.1891	0.5999	0.8927
hsa-miR-29a-5p	3	3	1	7	3	9	0	4	0	11	9	9	4	1	3.1	2.7	1.4	5.1	2.4	6.6	0	4.4	0	7	10.9	8.8	5.4	1.1	4.2	0.1893	0.6051	0.8927
hsa-miR-1306-5p	1	5	3	9	3	3	0	2	0	10	4	3	2	2	1	4.6	4.1	6.6	2.4	2.2	0	2.2	0	6.4	4.8	2.9	2.7	2.1	3	-0.1891	0.6053	0.8927
hsa-miR-34a-5p	323	319	408	755	540	679	440	251	366	826	389	744	386	441	334.1	291.7	564.2	555.1	427.9	497.4	454.8	277	401.8	526.6	470.6	731.1	518.1	468.6	465.6	0.1035	0.6075	0.8927
hsa-miR-744-5p	23	26	13	58	32	25	19	34	38	45	23	26	21	16	23.8	23.8	18	42.6	25.4	18.3	19.6	37.5	41.7	28.7	27.8	25.5	28.2	17	27	0.1246	0.6102	0.8927
hsa-miR-576-3p	2	4	2	4	6	11	2	3	16	1	3	2	6	5	2.1	3.7	2.8	2.9	4.8	8.1	2.1	3.3	17.6	0.6	3.6	2	8.1	5.3	4.8	0.1856	0.6102	0.8927
hsa-miR-217-5p	55	49	66	77	59	67	28	57	46	33	23	79	66	50	56.9	44.8	91.3	56.6	46.7	49.1	28.9	62.9	50.5	21	27.8	77.6	88.6	53.1	54	-0.1381	0.6117	0.8927
hsa-miR-181b-5p	154	229	240	425	240	233	248	212	215	414	174	269	195	210	159.3	209.4	331.9	312.5	190.2	170.7	256.3	233.9	236.1	263.9	210.5	264.3	261.7	223.1	237.4	0.0881	0.615	0.8939
hsa-miR-501-3p	11	15	15	29	18	15	18	5	15	36	8	10	13	6	11.4	13.7	20.7	21.3	14.3	11	18.6	5.5	16.5	23	9.7	9.8	17.4	6.4	14.2	-0.1438	0.6226	0.8979
hsa-miR-193a-5p	49	132	81	131	53	72	104	72	57	131	53	136	81	54	50.7	120.7	112	96.3	42	52.7	107.5	79.4	62.6	83.5	64.1	133.6	108.7	57.4	83.7	0.1245	0.6228	0.8979
hsa-miR-455-5p	33	20	20	33	40	31	42	13	19	20	30	16	15	26	34.1	18.3	27.7	24.3	31.7	22.7	43.4	14.3	20.9	12.8	36.3	15.7	20.1	27.6	25	-0.1297	0.6261	0.8991
hsa-miR-23c	800	1323	1	63	18	15	774	721	0	83	21	52	33	26	827.6	1209.9	1.4	46.3	14.3	11	799.9	795.6	0	52.9	25.4	51.1	44.3	27.6	279.1	-0.1421	0.6379	0.9123
hsa-miR-339-5p	75	60	57	132	71	108	81	72	41	138	60	119	60	62	77.6	54.9	78.8	97	56.3	79.1	83.7	79.4	45	88	72.6	116.9	80.5	65.9	76.8	0.0906	0.6502	0.9251
hsa-miR-338-3p	56	12	37	6	44	38	2	15	49	28	39	20	11	34	57.9	11	51.2	4.4	34.9	27.8	2.1	16.6	53.8	17.9	47.2	19.7	14.8	36.1	28.2	-0.1602	0.6519	0.9251
hsa-miR-127-3p	425	739	361	426	405	487	226	155	650	792	295	616	166	320	439.7	675.8	499.2	313.2	320.9	356.8	233.6	171	713.7	504.9	356.9	605.3	222.8	340	411	-0.1179	0.6625	0.9317
hsa-miR-144-3p	163	34	48	91	73	82	22	324	2	15	149	15	122	29	168.6	31.1	66.4	66.9	57.8	60.1	22.7	357.5	2.2	9.6	180.2	14.7	163.7	30.8	88	0.1569	0.6641	0.9317
hsa-miR-376c-3p	65	96	48	41	122	130	34	22	54	153	71	98	44	72	67.2	87.8	66.4	30.1	96.7	95.2	35.1	24.3	59.3	97.5	85.9	96.3	59.1	76.5	69.8	-0.1195	0.6648	0.9317
hsa-miR-877-5p	6	6	3	8	4	5	7	0	8	6	4	13	0	7	6.2	5.5	4.1	5.9	3.2	3.7	7.2	0	8.8	3.8	4.8	12.8	0	7.4	5.2	0.1539	0.667	0.9317
hsa-miR-100-3p	22	16	1	7	12	11	20	3	1	14	6	9	3	14	22.8	14.6	1.4	5.1	9.5	8.1	20.7	3.3	1.1	8.9	7.3	8.8	4	14.9	9.3	-0.1496	0.6744	0.9362
hsa-miR-432-5p	17	33	21	22	20	20	11	4	43	50	17	31	8	25	17.6	30.2	29	16.2	15.8	14.7	11.4	4.4	47.2	31.9	20.6	30.5	10.7	26.6	21.9	0.1315	0.6774	0.9362
hsa-miR-1296-5p	14	28	20	25	32	23	19	17	29	26	26	18	15	27	14.5	25.6	27.7	18.4	25.4	16.8	19.6	18.8	31.8	16.6	31.5	17.7	20.1	28.7	22.4	0.0974	0.6799	0.9362
hsa-miR-17-5p	140	86	120	240	166	215	149	239	45	108	99	82	124	128	144.8	78.6	165.9	176.4	131.5	157.5	154	263.7	49.4	68.9	119.8	80.6	166.4	136	135.3	-0.1131	0.6806	0.9362
hsa-miR-122-5p	19	18	20	268	86	104	10	10	26	386	35	31	33	31	19.7	16.5	27.7	197	68.1	76.2	10.3	11	28.5	246.1	42.3	30.5	44.3	32.9	60.8	-0.1487	0.6837	0.9368
hsa-miR-361-5p	294	335	306	669	421	398	363	297	256	585	283	373	258	317	304.1	306.4	423.1	491.8	333.6	291.6	375.2	327.7	281.1	373	342.4	366.5	346.3	336.8	350	-0.0571	0.688	0.9392
hsa-miR-664a-3p	40	103	63	130	107	128	92	76	24	115	66	96	65	73	41.4	94.2	87.1	95.6	84.8	93.8	95.1	83.9	26.4	73.3	79.8	94.3	87.2	77.6	79.6	-0.0918	0.6948	0.9419
hsa-miR-337-3p	27	28	31	17	18	36	17	5	38	48	24	24	7	17	27.9	25.6	42.9	12.5	14.3	26.4	17.6	5.5	41.7	30.6	29	23.6	9.4	18.1	23.2	-0.1214	0.6953	0.9419
hsa-miR-423-3p	464	835	761	1327	829	1001	500	603	493	1665	476	947	620	695	480	763.6	1052.3	975.6	656.9	733.3	516.8	665.4	541.3	1061.5	575.8	930.6	832.1	738.5	751.7	-0.0765	0.7048	0.9487
hsa-miR-411-3p	26	21	8	15	13	17	22	4	13	28	11	16	7	10	26.9	19.2	11.1	11	10.3	12.5	22.7	4.4	14.3	17.9	13.3	15.7	9.4	10.6	14.2	-0.1106	0.7056	0.9487
hsa-miR-340-3p	50	55	25	58	65	61	69	32	15	93	29	42	28	43	51.7	50.3	34.6	42.6	51.5	44.7	71.3	35.3	16.5	59.3	35.1	41.3	37.6	45.7	44.1	-0.0855	0.7183	0.9591
hsa-miR-431-5p	6	6	5	2	4	7	0	0	11	29	2	2	2	6	6.2	5.5	6.9	1.5	3.2	5.1	0	0	12.1	18.5	2.4	2	2.7	6.4	5.2	0.1318	0.7186	0.9591
hsa-miR-30c-5p	3643	4457	2333	5309	4192	4628	4654	4431	2973	5821	2472	3813	2537	2938	3768.7	4075.9	3226	3903.1	3321.5	3390.4	4810	4889.4	3264.2	3711.1	2990.4	3746.9	3404.9	3121.9	3687.5	0.0484	0.7265	0.9629
hsa-miR-34a-3p	2	1	0	3	14	5	5	1	0	6	1	8	2	0	2.1	0.9	0	2.2	11.1	3.7	5.2	1.1	0	3.8	1.2	7.9	2.7	0	3	-0.1247	0.7293	0.9629
hsa-miR-125b-5p	9775	12290	10157	18951	12541	13835	14900	10341	5141	21057	5761	19589	10320	11389	10112.4	11239.2	14044.9	13932.6	9936.8	10135.4	15399.5	11410.7	5644.5	13424.5	6969.2	19249.3	13850.6	12102	11960.8	0.0749	0.7367	0.9629
hsa-miR-223-5p	7	5	0	3	4	5	6	0	8	12	5	3	0	1	7.2	4.6	0	2.2	3.2	3.7	6.2	0	8.8	7.7	6	2.9	0	1.1	3.8	0.1225	0.738	0.9629
hsa-miR-23b-5p	5	6	4	11	8	6	0	1	12	10	1	9	5	3	5.2	5.5	5.5	8.1	6.3	4.4	0	1.1	13.2	6.4	1.2	8.8	6.7	3.2	5.4	-0.1195	0.7386	0.9629
hsa-miR-95-3p	114	158	155	269	317	295	121	128	107	320	160	151	192	240	117.9	144.5	214.3	197.8	251.2	216.1	125.1	141.2	117.5	204	193.6	148.4	257.7	255	184.6	-0.0718	0.7401	0.9629
hsa-miR-223-3p	490	263	146	525	903	338	327	627	333	1014	250	169	97	138	506.9	240.5	201.9	386	715.5	247.6	338	691.9	365.6	646.5	302.4	166.1	130.2	146.6	363.3	-0.1037	0.7403	0.9629
hsa-let-7e-5p	682	775	504	966	467	847	418	450	887	914	481	670	383	576	705.5	708.7	696.9	710.2	370	620.5	432	496.5	973.9	582.7	581.9	658.4	514	612.1	618.8	-0.0617	0.7461	0.9669
hsa-miR-140-3p	31218	59724	24120	57493	49275	40241	40772	34552	35004	44442	32107	40373	21883	39901	32295.4	54617.7	33352.7	42268.3	39042.9	29480.2	42138.8	38126.2	38432.3	28333.2	38840.7	39672.9	29369.5	42398.9	37740.7	-0.0489	0.7546	0.9745
hsa-miR-193a-3p	34	40	24	32	46	52	38	17	36	20	26	28	33	41	35.2	36.6	33.2	23.5	36.4	38.1	39.3	18.8	39.5	12.8	31.5	27.5	44.3	43.6	32.9	-0.0767	0.7576	0.9749
hsa-miR-143-5p	428	738	474	1247	1027	1110	816	865	550	829	609	541	449	685	442.8	674.9	655.4	916.8	813.7	813.2	843.4	954.5	603.9	528.5	736.7	531.6	602.6	727.9	703.3	-0.0554	0.7605	0.9751
hsa-miR-7-5p	219	145	81	210	195	175	135	432	157	175	98	71	78	107	226.6	132.6	112	154.4	154.5	128.2	139.5	476.7	172.4	111.6	118.6	69.8	104.7	113.7	158.2	0.0867	0.7692	0.9824
hsa-miR-502-3p	30	36	30	84	62	45	27	17	67	74	34	34	33	26	31	32.9	41.5	61.8	49.1	33	27.9	18.8	73.6	47.2	41.1	33.4	44.3	27.6	40.2	-0.0741	0.7717	0.9824
hsa-miR-132-3p	32	44	34	51	47	56	28	69	16	58	28	38	19	38	33.1	40.2	47	37.5	37.2	41	28.9	76.1	17.6	37	33.9	37.3	25.5	40.4	38.1	-0.0695	0.7752	0.9834
hsa-miR-376a-5p	4	4	5	2	6	7	0	9	10	3	4	0	1	1	4.1	3.7	6.9	1.5	4.8	5.1	0	9.9	11	1.9	4.8	0	1.3	1.1	4	-0.0991	0.7864	0.9887
hsa-miR-136-5p	6	6	2	1	6	11	6	5	1	9	7	5	3	5	6.2	5.5	2.8	0.7	4.8	8.1	6.2	5.5	1.1	5.7	8.5	4.9	4	5.3	4.9	0.091	0.7925	0.9887
hsa-miR-18a-5p	10	6	12	20	20	22	7	31	1	22	15	7	11	18	10.3	5.5	16.6	14.7	15.8	16.1	7.2	34.2	1.1	14	18.1	6.9	14.8	19.1	13.9	0.0881	0.7934	0.9887
hsa-miR-16-5p	6115	2969	3169	7775	5169	5434	3030	10757	3412	5548	3444	3756	3519	3306	6326	2715.2	4382	5716.1	4095.6	3980.9	3131.6	11869.7	3746.2	3537	4166.3	3690.9	4722.9	3513	4685.2	0.0686	0.7937	0.9887
hsa-miR-1287-5p	2	3	3	7	4	3	3	6	0	8	3	5	3	1	2.1	2.7	4.1	5.1	3.2	2.2	3.1	6.6	0	5.1	3.6	4.9	4	1.1	3.4	0.0922	0.7969	0.9887
hsa-miR-576-5p	7	6	3	11	2	6	13	7	1	6	7	2	3	5	7.2	5.5	4.1	8.1	1.6	4.4	13.4	7.7	1.1	3.8	8.5	2	4	5.3	5.5	0.0897	0.7985	0.9887
hsa-miR-655-3p	28	29	13	4	17	18	17	7	27	30	30	13	7	14	29	26.5	18	2.9	13.5	13.2	17.6	7.7	29.6	19.1	36.3	12.8	9.4	14.9	17.9	0.083	0.7997	0.9887
hsa-miR-27b-3p	22674	25978	21924	42033	42002	40578	21605	21683	16946	46130	23947	30446	27150	30660	23456.5	23756.9	30316.1	30902.3	33280.1	29727.1	22329.3	23925.9	18605.7	29409.4	28969.3	29918	36438.4	32579.4	28115.3	-0.0391	0.8038	0.9887
hsa-miR-132-5p	8	8	5	13	12	11	4	23	2	14	6	8	4	10	8.3	7.3	6.9	9.6	9.5	8.1	4.1	25.4	2.2	8.9	7.3	7.9	5.4	10.6	8.7	0.0794	0.8098	0.9887
hsa-miR-24-2-5p	154	283	138	247	270	314	272	275	198	195	134	180	181	188	159.3	258.8	190.8	181.6	213.9	230	281.1	303.4	217.4	124.3	162.1	176.9	242.9	199.8	210.2	0.046	0.8129	0.9887
hsa-miR-664b-3p	4	6	7	12	4	12	6	13	3	17	2	3	8	6	4.1	5.5	9.7	8.8	3.2	8.8	6.2	14.3	3.3	10.8	2.4	2.9	10.7	6.4	6.9	0.079	0.8147	0.9887
hsa-miR-532-3p	5	11	4	21	11	14	6	6	23	15	8	9	5	7	5.2	10.1	5.5	15.4	8.7	10.3	6.2	6.6	25.3	9.6	9.7	8.8	6.7	7.4	9.7	0.0721	0.8196	0.9887
hsa-miR-574-3p	165	320	330	677	294	312	336	245	339	600	202	448	205	254	170.7	292.6	456.3	497.7	232.9	228.6	347.3	270.3	372.2	382.5	244.4	440.2	275.1	269.9	320.1	0.0506	0.8222	0.9887
hsa-miR-190a-5p	63	39	19	18	67	64	32	36	12	50	67	21	27	44	65.2	35.7	26.3	13.2	53.1	46.9	33.1	39.7	13.2	31.9	81.1	20.6	36.2	46.8	38.8	-0.0683	0.823	0.9887
hsa-miR-409-3p	119	235	77	87	114	107	111	73	140	241	46	148	48	83	123.1	214.9	106.5	64	90.3	78.4	114.7	80.6	153.7	153.6	55.6	145.4	64.4	88.2	109.5	-0.0595	0.8233	0.9887
hsa-miR-182-5p	123	21	143	293	59	64	67	605	49	23	47	19	62	26	127.2	19.2	197.7	215.4	46.7	46.9	69.2	667.6	53.8	14.7	56.9	18.7	83.2	27.6	117.5	0.0803	0.8247	0.9887
hsa-miR-27a-3p	7322	11575	6620	12577	16814	19398	6787	7333	6608	14226	9834	10948	10981	13036	7574.7	10585.4	9154	9246.5	13322.5	14210.8	7014.5	8091.5	7255.2	9069.5	11896.5	10758.2	14737.8	13852.1	10483.5	-0.044	0.8264	0.9887
hsa-miR-128-3p	391	904	326	913	539	486	750	838	509	248	189	482	298	427	404.5	826.7	450.8	671.2	427.1	356	775.1	924.7	558.9	158.1	228.6	473.6	400	453.7	507.8	-0.0606	0.8314	0.9887
hsa-miR-589-5p	5	12	10	11	2	1	4	12	17	4	6	4	3	4	5.2	11	13.8	8.1	1.6	0.7	4.1	13.2	18.7	2.6	7.3	3.9	4	4.3	7	0.0767	0.8321	0.9887
hsa-miR-500a-3p	27	38	35	70	52	50	39	32	48	79	30	33	27	42	27.9	34.8	48.4	51.5	41.2	36.6	40.3	35.3	52.7	50.4	36.3	32.4	36.2	44.6	40.6	0.0401	0.8345	0.9887
hsa-miR-29c-3p	1063	976	589	1075	1496	1773	937	932	797	1006	1206	783	990	1209	1099.7	892.6	814.5	790.3	1185.4	1298.9	968.4	1028.4	875.1	641.4	1458.9	769.4	1328.7	1284.7	1031.2	0.0389	0.8408	0.9895
hsa-miR-33a-3p	3	6	1	4	5	9	11	0	0	7	3	2	4	2	3.1	5.5	1.4	2.9	4	6.6	11.4	0	0	4.5	3.6	2	5.4	2.1	3.7	-0.0731	0.8414	0.9895
hsa-miR-582-3p	27	21	5	8	5	28	18	15	28	24	5	4	5	6	27.9	19.2	6.9	5.9	4	20.5	18.6	16.6	30.7	15.3	6	3.9	6.7	6.4	13.5	-0.0685	0.8442	0.9895
hsa-miR-374a-5p	6156	3930	1044	2046	2685	3135	5543	4714	2390	3496	1696	1781	1764	2185	6368.5	3594	1443.6	1504.2	2127.5	2296.7	5728.8	5201.6	2624.1	2228.8	2051.7	1750.1	2367.5	2321.8	2972.1	0.0562	0.8493	0.9895
hsa-miR-590-3p	49	53	14	40	44	60	69	39	9	52	46	26	30	37	50.7	48.5	19.4	29.4	34.9	44	71.3	43	9.9	33.2	55.6	25.5	40.3	39.3	38.9	0.0539	0.8496	0.9895
hsa-miR-26a-5p	38157	45612	29546	63932	57310	66546	40562	36362	29781	63968	31839	43263	45091	45099	39473.9	41712.3	40855.7	47002.2	45409.4	48751	41921.8	40123.4	32697.8	40781.7	38516.5	42512.8	60517.3	47922.3	43442.7	-0.0238	0.8576	0.9895
hsa-miR-382-5p	43	67	21	20	42	39	13	23	78	80	26	48	13	22	44.5	61.3	29	14.7	33.3	28.6	13.4	25.4	85.6	51	31.5	47.2	17.4	23.4	36.2	0.0556	0.8593	0.9895
hsa-miR-486-3p	3	1	4	11	1	3	3	15	1	11	0	0	1	1	3.1	0.9	5.5	8.1	0.8	2.2	3.1	16.6	1.1	7	0	0	1.3	1.1	3.6	0.063	0.8604	0.9895
hsa-miR-671-5p	4	13	6	15	8	11	1	12	11	8	4	17	7	8	4.1	11.9	8.3	11	6.3	8.1	1	13.2	12.1	5.1	4.8	16.7	9.4	8.5	8.6	0.0576	0.8617	0.9895
hsa-miR-410-3p	19	32	25	19	32	22	14	24	27	42	18	25	8	19	19.7	29.3	34.6	14	25.4	16.1	14.5	26.5	29.6	26.8	21.8	24.6	10.7	20.2	22.4	-0.0425	0.8667	0.9895
hsa-miR-656-3p	33	22	11	17	20	26	22	7	17	13	20	29	19	14	34.1	20.1	15.2	12.5	15.8	19	22.7	7.7	18.7	8.3	24.2	28.5	25.5	14.9	19.1	-0.0482	0.867	0.9895
hsa-miR-30d-3p	8	6	3	9	5	9	19	6	0	7	5	2	3	7	8.3	5.5	4.1	6.6	4	6.6	19.6	6.6	0	4.5	6	2	4	7.4	6.1	0.0591	0.8682	0.9895
hsa-miR-425-3p	17	20	21	48	32	23	25	24	29	27	21	20	14	19	17.6	18.3	29	35.3	25.4	16.8	25.8	26.5	31.8	17.2	25.4	19.7	18.8	20.2	23.4	-0.0364	0.8763	0.9922
hsa-miR-17-3p	6	2	1	6	5	8	2	6	1	1	2	4	6	6	6.2	1.8	1.4	4.4	4	5.9	2.1	6.6	1.1	0.6	2.4	3.9	8.1	6.4	3.9	-0.0553	0.8781	0.9922
hsa-miR-26a-2-3p	8	8	5	2	7	6	12	11	0	12	1	4	2	1	8.3	7.3	6.9	1.5	5.5	4.4	12.4	12.1	0	7.7	1.2	3.9	2.7	1.1	5.4	-0.0533	0.8839	0.9922
hsa-miR-889-3p	75	71	19	22	48	73	79	9	54	89	29	37	25	38	77.6	64.9	26.3	16.2	38	53.5	81.6	9.9	59.3	56.7	35.1	36.4	33.6	40.4	45	-0.0451	0.8846	0.9922
hsa-miR-216a-5p	12	12	22	17	14	18	17	19	3	22	11	23	9	17	12.4	11	30.4	12.5	11.1	13.2	17.6	21	3.3	14	13.3	22.6	12.1	18.1	15.2	0.0428	0.8847	0.9922
hsa-miR-454-3p	93	71	63	121	133	148	49	88	42	175	84	100	75	106	96.2	64.9	87.1	89	105.4	108.4	50.6	97.1	46.1	111.6	101.6	98.3	100.7	112.6	90.7	-0.0294	0.889	0.9922
hsa-miR-27b-5p	79	92	85	151	124	95	79	45	75	134	86	112	79	108	81.7	84.1	117.5	111	98.3	69.6	81.6	49.7	82.3	85.4	104	110.1	106	114.8	92.6	-0.0262	0.89	0.9922
hsa-miR-194-5p	159	90	51	126	84	123	85	203	66	69	72	78	56	63	164.5	82.3	70.5	92.6	66.6	90.1	87.8	224	72.5	44	87.1	76.6	75.2	66.9	92.9	-0.036	0.8965	0.9964
hsa-miR-340-5p	795	661	245	373	529	783	782	633	453	641	409	235	247	442	822.4	604.5	338.8	274.2	419.2	573.6	808.2	698.5	497.4	408.7	494.8	230.9	331.5	469.7	498	-0.0323	0.8998	0.9966
hsa-miR-485-3p	1	12	7	8	6	6	2	0	11	17	3	8	3	9	1	11	9.7	5.9	4.8	4.4	2.1	0	12.1	10.8	3.6	7.9	4	9.6	6.2	0.0428	0.9051	0.9966
hsa-miR-374a-3p	348	265	63	131	172	291	314	179	142	248	136	85	136	194	360	242.3	87.1	96.3	136.3	213.2	324.5	197.5	155.9	158.1	164.5	83.5	182.5	206.1	186.3	-0.0331	0.9056	0.9966
hsa-miR-19b-3p	172	176	72	196	238	276	190	277	98	100	157	98	108	156	177.9	161	99.6	144.1	188.6	202.2	196.4	305.7	107.6	63.8	189.9	96.3	144.9	165.8	160.3	-0.03	0.908	0.9966
hsa-miR-130b-5p	11	17	7	23	8	10	19	5	6	28	10	12	5	10	11.4	15.5	9.7	16.9	6.3	7.3	19.6	5.5	6.6	17.9	12.1	11.8	6.7	10.6	11.3	0.0341	0.9106	0.9966
hsa-miR-543	20	24	14	9	16	6	24	6	7	35	3	24	8	15	20.7	21.9	19.4	6.6	12.7	4.4	24.8	6.6	7.7	22.3	3.6	23.6	10.7	15.9	14.4	0.0364	0.9134	0.9967
hsa-miR-1249-3p	1	8	2	15	10	20	25	0	0	10	4	8	3	8	1	7.3	2.8	11	7.9	14.7	25.8	0	0	6.4	4.8	7.9	4	8.5	7.3	-0.0339	0.9263	0.9976
hsa-miR-15b-3p	13	5	17	24	19	14	10	26	9	17	10	11	16	5	13.4	4.6	23.5	17.6	15.1	10.3	10.3	28.7	9.9	10.8	12.1	10.8	21.5	5.3	13.9	-0.0289	0.9265	0.9976
hsa-miR-224-5p	45	44	34	74	60	65	43	43	36	47	85	52	18	44	46.6	40.2	47	54.4	47.5	47.6	44.4	47.4	39.5	30	102.8	51.1	24.2	46.8	47.8	0.0217	0.9294	0.9976
hsa-miR-193b-3p	202	221	200	478	520	435	170	93	543	303	395	277	165	263	209	202.1	276.6	351.4	412	318.7	175.7	102.6	596.2	193.2	477.8	272.2	221.4	279.5	292	-0.0219	0.9379	0.9976
hsa-miR-377-3p	8	10	3	4	21	5	0	1	14	19	9	5	1	11	8.3	9.1	4.1	2.9	16.6	3.7	0	1.1	15.4	12.1	10.9	4.9	1.3	11.7	7.3	-0.0271	0.9408	0.9976
hsa-miR-501-5p	3	4	2	24	8	5	8	9	12	6	0	5	2	6	3.1	3.7	2.8	17.6	6.3	3.7	8.3	9.9	13.2	3.8	0	4.9	2.7	6.4	6.2	-0.0262	0.942	0.9976
hsa-miR-598-3p	19	24	30	17	28	24	26	28	15	22	18	14	16	28	19.7	21.9	41.5	12.5	22.2	17.6	26.9	30.9	16.5	14	21.8	13.8	21.5	29.8	22.2	-0.0186	0.9438	0.9976
hsa-let-7g-5p	12096	12596	6730	12364	10910	12126	11407	11828	9886	15710	7118	6990	6570	8768	12513.5	11519.1	9306.1	9089.9	8644.5	8883.4	11789.4	13051.5	10854.2	10015.6	8610.8	6868.8	8817.7	9316.9	9948.7	-0.0106	0.9449	0.9976
hsa-miR-574-5p	10	18	31	43	12	31	15	28	8	53	23	23	10	24	10.3	16.5	42.9	31.6	9.5	22.7	15.5	30.9	8.8	33.8	27.8	22.6	13.4	25.5	22.3	0.0205	0.9464	0.9976
hsa-miR-101-5p	3	6	6	2	3	14	4	9	5	3	7	1	5	5	3.1	5.5	8.3	1.5	2.4	10.3	4.1	9.9	5.5	1.9	8.5	1	6.7	5.3	5.3	0.0238	0.9467	0.9976
hsa-miR-362-3p	8	14	3	2	11	15	8	7	6	5	10	8	5	9	8.3	12.8	4.1	1.5	8.7	11	8.3	7.7	6.6	3.2	12.1	7.9	6.7	9.6	7.7	-0.0215	0.9477	0.9976
hsa-miR-760	3	3	3	6	4	4	0	3	1	7	5	5	1	6	3.1	2.7	4.1	4.4	3.2	2.9	0	3.3	1.1	4.5	6	4.9	1.3	6.4	3.4	0.0224	0.9501	0.9976
hsa-miR-486-5p	714	478	629	2921	806	878	495	3461	582	1388	517	187	433	201	738.6	437.1	869.8	2147.5	638.6	643.2	511.6	3819	639	884.9	625.4	183.8	581.1	213.6	923.8	0.0193	0.9565	0.9976
hsa-let-7i-3p	52	76	43	66	97	177	27	34	30	111	94	69	95	109	53.8	69.5	59.5	48.5	76.9	129.7	27.9	37.5	32.9	70.8	113.7	67.8	127.5	115.8	73.7	0.0152	0.959	0.9976
hsa-miR-106b-5p	834	393	237	395	559	601	629	755	134	430	352	293	399	412	862.8	359.4	327.7	290.4	442.9	440.3	650.1	833.1	147.1	274.1	425.8	287.9	535.5	437.8	451.1	-0.0132	0.963	0.9976
hsa-miR-30a-5p	20790	21578	12601	28503	24721	30237	29379	23413	17424	22629	17416	16071	14245	15954	21507.5	19733.1	17424.4	20955.1	19587.6	22151.4	30363.9	25834.9	19130.5	14426.7	21068.6	15792.3	19118.4	16952.7	20289.1	0.0073	0.9644	0.9976
hsa-miR-328-3p	35	56	53	95	54	84	33	50	66	90	41	74	41	43	36.2	51.2	73.3	69.8	42.8	61.5	34.1	55.2	72.5	57.4	49.6	72.7	55	45.7	55.5	-0.009	0.9653	0.9976
hsa-miR-149-5p	37	33	28	31	37	27	33	9	30	47	27	41	23	25	38.3	30.2	38.7	22.8	29.3	19.8	34.1	9.9	32.9	30	32.7	40.3	30.9	26.6	29.7	0.0095	0.9686	0.9976
hsa-miR-29b-3p	664	471	408	735	926	971	514	492	487	789	556	621	510	748	686.9	430.7	564.2	540.4	733.7	711.3	531.2	542.9	534.7	503	672.6	610.2	684.5	794.8	610.1	-0.0057	0.9704	0.9976
hsa-miR-22-5p	42	49	49	106	66	82	26	31	43	121	72	52	49	65	43.4	44.8	67.8	77.9	52.3	60.1	26.9	34.2	47.2	77.1	87.1	51.1	65.8	69.1	57.5	-0.0086	0.9714	0.9976
hsa-miR-203a-3p	29	10	8	19	12	21	10	11	12	12	11	20	21	14	30	9.1	11.1	14	9.5	15.4	10.3	12.1	13.2	7.7	13.3	19.7	28.2	14.9	14.9	-0.0085	0.977	0.9976
hsa-miR-628-5p	15	11	11	11	37	27	3	4	7	20	18	26	24	24	15.5	10.1	15.2	8.1	29.3	19.8	3.1	4.4	7.7	12.8	21.8	25.5	32.2	25.5	16.5	0.0094	0.9779	0.9976
hsa-miR-370-3p	15	25	13	13	11	13	9	4	9	41	9	16	10	17	15.5	22.9	18	9.6	8.7	9.5	9.3	4.4	9.9	26.1	10.9	15.7	13.4	18.1	13.7	-0.0082	0.9786	0.9976
hsa-miR-103a-3p	3763	6386	2353	4846	4361	4718	2768	4040	3246	3442	3014	5973	3399	3801	3892.9	5840	3253.7	3562.7	3455.4	3456.4	2860.8	4457.9	3563.9	2194.4	3646.1	5869.4	4561.9	4038.9	3903.9	-0.0039	0.9846	0.9976
hsa-miR-16-2-3p	33	18	23	80	45	38	23	65	18	51	19	29	34	29	34.1	16.5	31.8	58.8	35.7	27.8	23.8	71.7	19.8	32.5	23	28.5	45.6	30.8	34.3	0.0051	0.9853	0.9976
hsa-miR-671-3p	3	2	4	10	3	5	4	3	1	16	1	4	3	2	3.1	1.8	5.5	7.4	2.4	3.7	4.1	3.3	1.1	10.2	1.2	3.9	4	2.1	3.8	-0.0058	0.987	0.9976
hsa-miR-3912-3p	8	5	2	1	5	8	3	3	4	7	8	4	4	1	8.3	4.6	2.8	0.7	4	5.9	3.1	3.3	4.4	4.5	9.7	3.9	5.4	1.1	4.4	0.0046	0.9897	0.9976
hsa-miR-214-3p	342	576	394	904	482	498	308	367	437	835	280	741	403	417	353.8	526.8	544.8	664.6	381.9	364.8	318.3	405	479.8	532.3	338.7	728.2	540.9	443.1	473.1	0.002	0.9921	0.9976
hsa-miR-660-5p	77	87	55	67	109	142	79	68	65	105	78	77	67	76	79.7	79.6	76.1	49.3	86.4	104	81.6	75	71.4	66.9	94.4	75.7	89.9	80.8	79.3	-0.0009	0.9958	0.9986
hsa-miR-339-3p	132	79	54	81	71	99	101	79	109	84	44	92	47	53	136.6	72.2	74.7	59.6	56.3	72.5	104.4	87.2	119.7	53.6	53.2	90.4	63.1	56.3	78.5	0.0004	0.9986	0.9986
hsa-let-7a-2-3p	2	4	2	5	4	5	0	0	1	3	1	1	2	1	2.1	3.7	2.8	3.7	3.2	3.7	0	0	1.1	1.9	1.2	1	2.7	1.1	2	-0.7668	0.0362
hsa-miR-4497	0	0	0	0	1	2	6	3	0	1	1	1	2	3	0	0	0	0	0.8	1.5	6.2	3.3	0	0.6	1.2	1	2.7	3.2	1.5	0.7007	0.0425
hsa-miR-550a-3p	2	1	0	6	1	1	0	0	0	0	0	1	0	0	2.1	0.9	0	4.4	0.8	0.7	0	0	0	0	0	1	0	0	0.7	-0.5944	0.0459
hsa-miR-605-5p	0	1	0	0	1	0	0	2	3	2	1	3	0	2	0	0.9	0	0	0.8	0	0	2.2	3.3	1.3	1.2	2.9	0	2.1	1.1	0.6341	0.0596
hsa-miR-6853-3p	0	0	0	0	0	0	0	0	1	2	1	1	1	2	0	0	0	0	0	0	0	0	1.1	1.3	1.2	1	1.3	2.1	0.6	0.5193	0.0721
hsa-miR-944	0	0	0	0	0	0	2	0	0	2	3	1	1	0	0	0	0	0	0	0	2.1	0	0	1.3	3.6	1	1.3	0	0.7	0.4782	0.0826
hsa-miR-365b-5p	0	0	0	0	0	1	0	0	5	2	0	2	1	1	0	0	0	0	0	0.7	0	0	5.5	1.3	0	2	1.3	1.1	0.8	0.5011	0.0916
hsa-miR-10399-5p	0	1	0	0	0	1	0	0	11	3	2	0	0	2	0	0.9	0	0	0	0.7	0	0	12.1	1.9	2.4	0	0	2.1	1.4	0.4996	0.0969
hsa-miR-491-5p	0	2	1	3	1	1	5	2	5	1	1	1	1	7	0	1.8	1.4	2.2	0.8	0.7	5.2	2.2	5.5	0.6	1.2	1	1.3	7.4	2.2	0.5962	0.102
hsa-miR-154-5p	6	5	4	8	2	3	0	0	4	5	4	1	0	2	6.2	4.6	5.5	5.9	1.6	2.2	0	0	4.4	3.2	4.8	1	0	2.1	3	-0.5694	0.1198
hsa-miR-3065-5p	0	1	0	0	0	1	7	0	0	1	0	7	1	0	0	0.9	0	0	0	0.7	7.2	0	0	0.6	0	6.9	1.3	0	1.3	0.451	0.1261
hsa-miR-378c	0	2	1	1	3	4	6	2	0	1	7	4	4	3	0	1.8	1.4	0.7	2.4	2.9	6.2	2.2	0	0.6	8.5	3.9	5.4	3.2	2.8	0.5594	0.1262
hsa-miR-380-3p	2	0	1	3	4	4	0	0	0	4	1	0	0	1	2.1	0	1.4	2.2	3.2	2.9	0	0	0	2.6	1.2	0	0	1.1	1.2	-0.4998	0.1438
hsa-miR-605-3p	1	3	0	0	0	0	4	0	2	3	1	3	1	1	1	2.7	0	0	0	0	4.1	0	2.2	1.9	1.2	2.9	1.3	1.1	1.3	0.5011	0.1479
hsa-miR-551b-3p	0	0	0	0	2	0	11	0	2	0	1	0	0	3	0	0	0	0	1.6	0	11.4	0	2.2	0	1.2	0	0	3.2	1.4	0.4048	0.1481
hsa-miR-4662a-5p	0	2	1	3	1	2	0	0	0	2	0	0	0	1	0	1.8	1.4	2.2	0.8	1.5	0	0	0	1.3	0	0	0	1.1	0.7	-0.4532	0.1495
hsa-miR-4649-3p	0	1	2	1	1	1	0	0	0	0	0	0	0	0	0	0.9	2.8	0.7	0.8	0.7	0	0	0	0	0	0	0	0	0.4	-0.3767	0.1503
hsa-miR-377-5p	2	4	1	2	4	6	0	0	0	2	2	3	1	2	2.1	3.7	1.4	1.5	3.2	4.4	0	0	0	1.3	2.4	2.9	1.3	2.1	1.9	-0.5243	0.1515
hsa-miR-4705	0	0	0	0	1	2	4	0	4	1	3	1	0	0	0	0	0	0	0.8	1.5	4.1	0	4.4	0.6	3.6	1	0	0	1.1	0.4508	0.1547
hsa-miR-1306-3p	3	0	1	3	0	1	0	0	0	2	0	0	0	0	3.1	0	1.4	2.2	0	0.7	0	0	0	1.3	0	0	0	0	0.6	-0.3755	0.1637
hsa-miR-556-5p	3	1	0	0	0	2	16	8	0	1	1	0	0	1	3.1	0.9	0	0	0	1.5	16.5	8.8	0	0.6	1.2	0	0	1.1	2.4	0.4322	0.173
hsa-miR-374c-5p	2	3	0	1	2	2	0	1	0	1	0	2	0	0	2.1	2.7	0	0.7	1.6	1.5	0	1.1	0	0.6	0	2	0	0	0.9	-0.4544	0.1736
hsa-miR-548ah-3p	0	0	0	0	0	0	1	2	0	0	0	1	1	1	0	0	0	0	0	0	1	2.2	0	0	0	1	1.3	1.1	0.5	0.3525	0.1757
hsa-miR-2277-5p	2	2	0	0	1	0	3	3	0	2	1	2	1	3	2.1	1.8	0	0	0.8	0	3.1	3.3	0	1.3	1.2	2	1.3	3.2	1.4	0.4807	0.1765
hsa-miR-6513-3p	0	0	1	3	1	1	2	2	2	1	1	3	2	2	0	0	1.4	2.2	0.8	0.7	2.1	2.2	2.2	0.6	1.2	2.9	2.7	2.1	1.5	0.4821	0.1831
hsa-miR-186-3p	0	3	1	1	2	1	0	0	1	1	0	1	0	0	0	2.7	1.4	0.7	1.6	0.7	0	0	1.1	0.6	0	1	0	0	0.7	-0.4218	0.1873
hsa-miR-190b-5p	1	2	4	1	2	3	0	0	0	3	1	0	2	1	1	1.8	5.5	0.7	1.6	2.2	0	0	0	1.9	1.2	0	2.7	1.1	1.4	-0.4611	0.1936
hsa-miR-181b-2-3p	2	2	0	7	3	1	0	0	0	3	2	0	1	1	2.1	1.8	0	5.1	2.4	0.7	0	0	0	1.9	2.4	0	1.3	1.1	1.3	-0.454	0.1942
hsa-miR-1246	0	0	0	0	0	1	12	0	0	1	0	0	1	0	0	0	0	0	0	0.7	12.4	0	0	0.6	0	0	1.3	0	1.1	0.3186	0.1945
hsa-miR-6516-3p	3	0	1	1	2	2	0	0	0	0	2	0	1	0	3.1	0	1.4	0.7	1.6	1.5	0	0	0	0	2.4	0	1.3	0	0.9	-0.4103	0.1974
hsa-miR-3909	1	6	3	3	2	2	0	4	0	2	1	0	2	0	1	5.5	4.1	2.2	1.6	1.5	0	4.4	0	1.3	1.2	0	2.7	0	1.8	-0.4617	0.1985
hsa-miR-1245b-3p	1	1	0	0	1	4	0	0	0	0	0	1	0	0	1	0.9	0	0	0.8	2.9	0	0	0	0	0	1	0	0	0.5	-0.3379	0.2004
hsa-miR-548a-3p	0	0	0	0	0	1	0	0	0	3	2	1	0	2	0	0	0	0	0	0.7	0	0	0	1.9	2.4	1	0	2.1	0.6	0.337	0.2134
hsa-miR-370-5p	0	0	0	0	0	1	0	0	1	3	1	1	1	0	0	0	0	0	0	0.7	0	0	1.1	1.9	1.2	1	1.3	0	0.5	0.3441	0.2231
hsa-miR-665	1	1	2	4	0	3	1	5	3	14	2	1	1	1	1	0.9	2.8	2.9	0	2.2	1	5.5	3.3	8.9	2.4	1	1.3	1.1	2.5	0.445	0.2231
hsa-miR-376b-3p	2	2	0	1	0	3	0	0	0	1	0	1	1	0	2.1	1.8	0	0.7	0	2.2	0	0	0	0.6	0	1	1.3	0	0.7	-0.377	0.2252
hsa-miR-653-3p	1	2	0	2	2	2	0	2	0	12	2	2	2	3	1	1.8	0	1.5	1.6	1.5	0	2.2	0	7.7	2.4	2	2.7	3.2	2	0.4381	0.2273
hsa-miR-4326	1	2	0	0	1	2	4	0	0	5	1	3	4	0	1	1.8	0	0	0.8	1.5	4.1	0	0	3.2	1.2	2.9	5.4	0	1.6	0.4167	0.2311
hsa-miR-103a-2-5p	2	1	3	4	4	6	1	1	1	3	2	0	2	3	2.1	0.9	4.1	2.9	3.2	4.4	1	1.1	1.1	1.9	2.4	0	2.7	3.2	2.2	-0.4361	0.233
hsa-miR-6511b-3p	0	3	3	6	3	5	0	0	0	5	0	3	3	1	0	2.7	4.1	4.4	2.4	3.7	0	0	0	3.2	0	2.9	4	1.1	2	-0.41	0.2538
hsa-miR-1185-5p	1	1	1	0	1	3	0	0	0	2	0	1	0	0	1	0.9	1.4	0	0.8	2.2	0	0	0	1.3	0	1	0	0	0.6	-0.3425	0.2559
hsa-miR-873-5p	0	0	0	0	1	0	8	4	0	0	0	0	0	0	0	0	0	0	0.8	0	8.3	4.4	0	0	0	0	0	0	1	0.2459	0.2726
hsa-miR-548l	1	0	0	5	0	1	0	0	0	0	1	0	0	0	1	0	0	3.7	0	0.7	0	0	0	0	1.2	0	0	0	0.5	-0.2589	0.2758
hsa-miR-222-5p	0	0	0	0	0	0	0	0	0	2	3	0	2	0	0	0	0	0	0	0	0	0	0	1.3	3.6	0	2.7	0	0.5	0.2342	0.2758
hsa-miR-3928-3p	0	0	0	0	0	1	0	1	2	0	0	0	1	2	0	0	0	0	0	0.7	0	1.1	2.2	0	0	0	1.3	2.1	0.5	0.2814	0.2826
hsa-miR-34b-3p	1	0	0	1	1	1	0	1	8	2	0	0	0	1	1	0	0	0.7	0.8	0.7	0	1.1	8.8	1.3	0	0	0	1.1	1.1	0.3274	0.2999
hsa-miR-202-5p	0	0	0	0	0	0	0	0	0	6	1	1	0	0	0	0	0	0	0	0	0	0	0	3.8	1.2	1	0	0	0.4	0.2113	0.3073
hsa-miR-3606-5p	0	0	0	1	0	0	0	0	3	1	0	1	0	1	0	0	0	0.7	0	0	0	0	3.3	0.6	0	1	0	1.1	0.5	0.2608	0.3149
hsa-miR-766-3p	0	1	0	4	1	1	0	7	4	2	2	0	0	1	0	0.9	0	2.9	0.8	0.7	0	7.7	4.4	1.3	2.4	0	0	1.1	1.6	0.3409	0.3153
hsa-miR-1468-5p	4	0	1	0	0	4	4	11	0	6	2	0	2	0	4.1	0	1.4	0	0	2.9	4.1	12.1	0	3.8	2.4	0	2.7	0	2.4	0.3233	0.3299
hsa-miR-502-5p	0	1	3	2	1	1	0	3	2	4	1	1	3	3	0	0.9	4.1	1.5	0.8	0.7	0	3.3	2.2	2.6	1.2	1	4	3.2	1.8	0.3483	0.3384
hsa-miR-548b-5p	0	0	1	0	0	0	0	0	5	0	0	0	1	1	0	0	1.4	0	0	0	0	0	5.5	0	0	0	1.3	1.1	0.7	0.2294	0.339
hsa-miR-205-5p	1	0	2	2	1	0	0	0	0	2	0	0	0	1	1	0	2.8	1.5	0.8	0	0	0	0	1.3	0	0	0	1.1	0.6	-0.2669	0.3478
hsa-miR-1185-1-3p	1	2	1	0	1	2	0	0	0	4	0	0	0	0	1	1.8	1.4	0	0.8	1.5	0	0	0	2.6	0	0	0	0	0.6	-0.2631	0.3503
hsa-miR-552-3p	0	0	2	1	0	0	11	0	0	1	0	3	0	0	0	0	2.8	0.7	0	0	11.4	0	0	0.6	0	2.9	0	0	1.3	0.2512	0.3515
hsa-miR-18a-3p	7	5	0	7	4	3	1	8	0	3	2	1	2	1	7.2	4.6	0	5.1	3.2	2.2	1	8.8	0	1.9	2.4	1	2.7	1.1	2.9	-0.3407	0.352
hsa-miR-556-3p	0	0	0	0	0	0	0	6	0	0	0	0	0	1	0	0	0	0	0	0	0	6.6	0	0	0	0	0	1.1	0.5	0.1672	0.3559
hsa-miR-29b-1-5p	1	1	1	0	3	2	0	4	0	6	0	3	4	1	1	0.9	1.4	0	2.4	1.5	0	4.4	0	3.8	0	2.9	5.4	1.1	1.8	0.3273	0.3559
hsa-miR-185-3p	3	5	1	2	2	2	0	4	2	1	2	0	0	1	3.1	4.6	1.4	1.5	1.6	1.5	0	4.4	2.2	0.6	2.4	0	0	1.1	1.7	-0.3307	0.3609
hsa-miR-1292-5p	0	0	0	0	0	0	0	1	0	3	0	0	0	2	0	0	0	0	0	0	0	1.1	0	1.9	0	0	0	2.1	0.4	0.188	0.3609
hsa-miR-4772-3p	2	0	0	1	0	0	0	9	0	2	0	0	1	0	2.1	0	0	0.7	0	0	0	9.9	0	1.3	0	0	1.3	0	1.1	0.2445	0.3615
hsa-miR-153-3p	3	1	0	0	4	2	0	2	0	9	5	1	4	1	3.1	0.9	0	0	3.2	1.5	0	2.2	0	5.7	6	1	5.4	1.1	2.1	0.3204	0.3663
hsa-miR-454-5p	3	3	0	3	0	1	3	9	0	4	2	0	1	2	3.1	2.7	0	2.2	0	0.7	3.1	9.9	0	2.6	2.4	0	1.3	2.1	2.2	0.3193	0.3693
hsa-miR-125b-2-3p	0	0	0	0	2	4	0	0	2	2	3	4	1	1	0	0	0	0	1.6	2.9	0	0	2.2	1.3	3.6	3.9	1.3	1.1	1.3	0.2991	0.3716
hsa-miR-2355-5p	2	0	0	0	0	0	0	3	0	2	0	1	2	0	2.1	0	0	0	0	0	0	3.3	0	1.3	0	1	2.7	0	0.7	0.2452	0.3738
hsa-miR-329-5p	1	0	0	0	0	0	5	3	0	0	0	0	0	0	1	0	0	0	0	0	5.2	3.3	0	0	0	0	0	0	0.7	0.1913	0.3779
hsa-miR-188-5p	0	0	0	1	2	1	0	3	0	1	0	1	3	1	0	0	0	0.7	1.6	0.7	0	3.3	0	0.6	0	1	4	1.1	0.9	0.281	0.3823
hsa-miR-10399-3p	2	0	0	7	2	1	4	11	6	6	0	0	0	0	2.1	0	0	5.1	1.6	0.7	4.1	12.1	6.6	3.8	0	0	0	0	2.6	0.2901	0.3828
hsa-miR-92b-5p	0	0	0	0	0	1	4	0	0	1	0	1	0	0	0	0	0	0	0	0.7	4.1	0	0	0.6	0	1	0	0	0.5	0.2037	0.3834
hsa-miR-137-3p	1	1	0	0	0	0	3	0	0	1	0	1	0	2	1	0.9	0	0	0	0	3.1	0	0	0.6	0	1	0	2.1	0.6	0.2463	0.3913
hsa-miR-7976	0	0	0	0	0	0	0	8	0	0	0	0	0	0	0	0	0	0	0	0	0	8.8	0	0	0	0	0	0	0.6	0.1393	0.3985
hsa-miR-625-5p	3	1	0	1	0	1	0	0	7	3	2	0	1	1	3.1	0.9	0	0.7	0	0.7	0	0	7.7	1.9	2.4	0	1.3	1.1	1.4	0.2814	0.4012
hsa-miR-5010-3p	1	4	0	1	3	3	0	0	6	7	2	5	1	2	1	3.7	0	0.7	2.4	2.2	0	0	6.6	4.5	2.4	4.9	1.3	2.1	2.3	0.3045	0.4026
hsa-miR-212-3p	2	0	2	6	1	3	7	5	0	4	5	2	1	1	2.1	0	2.8	4.4	0.8	2.2	7.2	5.5	0	2.6	6	2	1.3	1.1	2.7	0.3055	0.4036
hsa-miR-190a-3p	1	2	0	0	1	1	0	0	0	0	1	1	0	0	1	1.8	0	0	0.8	0.7	0	0	0	0	1.2	1	0	0	0.5	-0.2344	0.4052
hsa-miR-130a-5p	2	3	0	0	0	2	0	2	0	0	0	0	0	1	2.1	2.7	0	0	0	1.5	0	2.2	0	0	0	0	0	1.1	0.7	-0.226	0.4078
hsa-miR-210-5p	2	5	2	4	3	1	0	3	0	3	0	2	1	4	2.1	4.6	2.8	2.9	2.4	0.7	0	3.3	0	1.9	0	2	1.3	4.3	2	-0.3021	0.4081
hsa-miR-551a	0	0	0	0	0	0	0	0	5	0	1	0	0	0	0	0	0	0	0	0	0	0	5.5	0	1.2	0	0	0	0.5	0.146	0.4101
hsa-miR-4687-5p	0	0	0	0	0	0	0	5	0	0	0	0	0	1	0	0	0	0	0	0	0	5.5	0	0	0	0	0	1.1	0.5	0.1454	0.4112
hsa-miR-6809-3p	0	0	0	0	0	0	0	5	0	0	0	1	0	0	0	0	0	0	0	0	0	5.5	0	0	0	1	0	0	0.5	0.145	0.4119
hsa-miR-552-5p	0	0	0	0	0	0	5	0	0	0	0	1	0	0	0	0	0	0	0	0	5.2	0	0	0	0	1	0	0	0.4	0.143	0.4154
hsa-miR-3144-3p	0	1	0	0	0	0	10	0	0	0	0	0	0	0	0	0.9	0	0	0	0	10.3	0	0	0	0	0	0	0	0.8	0.1531	0.4161
hsa-miR-1228-5p	0	0	0	0	0	0	3	0	0	1	0	0	1	0	0	0	0	0	0	0	3.1	0	0	0.6	0	0	1.3	0	0.4	0.1647	0.4164
hsa-miR-542-5p	0	0	0	0	0	0	7	0	0	0	0	0	0	0	0	0	0	0	0	0	7.2	0	0	0	0	0	0	0	0.5	0.1329	0.418
hsa-miR-483-5p	0	0	0	2	1	0	0	0	0	1	0	4	1	2	0	0	0	1.5	0.8	0	0	0	0	0.6	0	3.9	1.3	2.1	0.7	0.2326	0.4189
hsa-miR-3065-3p	0	1	1	0	2	0	0	0	1	1	3	1	2	1	0	0.9	1.4	0	1.6	0	0	0	1.1	0.6	3.6	1	2.7	1.1	1	0.2679	0.4195
hsa-miR-514a-3p	0	2	0	0	2	3	0	0	0	3	11	1	0	1	0	1.8	0	0	1.6	2.2	0	0	0	1.9	13.3	1	0	1.1	1.6	0.2463	0.4223
hsa-miR-509-3p	0	0	0	0	0	1	0	0	0	0	5	0	1	0	0	0	0	0	0	0.7	0	0	0	0	6	0	1.3	0	0.6	0.1659	0.4243
hsa-miR-660-3p	0	0	2	1	0	0	0	0	4	2	1	1	0	1	0	0	2.8	0.7	0	0	0	0	4.4	1.3	1.2	1	0	1.1	0.9	0.2463	0.4247
hsa-miR-616-5p	4	0	0	0	2	1	10	0	3	2	0	1	0	1	4.1	0	0	0	1.6	0.7	10.3	0	3.3	1.3	0	1	0	1.1	1.7	0.252	0.4351
hsa-miR-1294	0	0	0	1	0	3	6	0	0	0	0	1	3	0	0	0	0	0.7	0	2.2	6.2	0	0	0	0	1	4	0	1	0.2076	0.4395
hsa-miR-6513-5p	1	0	2	1	1	3	5	0	9	3	0	0	0	1	1	0	2.8	0.7	0.8	2.2	5.2	0	9.9	1.9	0	0	0	1.1	1.8	0.2596	0.4402
hsa-miR-4775	0	0	1	1	0	1	0	0	0	0	4	1	0	3	0	0	1.4	0.7	0	0.7	0	0	0	0	4.8	1	0	3.2	0.8	0.2213	0.4406
hsa-miR-509-3-5p	0	0	1	0	0	0	0	0	3	0	3	0	0	0	0	0	1.4	0	0	0	0	0	3.3	0	3.6	0	0	0	0.6	0.1646	0.4415
hsa-miR-491-3p	0	1	2	2	0	0	0	0	0	0	1	1	0	0	0	0.9	2.8	1.5	0	0	0	0	0	0	1.2	1	0	0	0.5	-0.2008	0.4444
hsa-miR-204-3p	0	0	2	1	2	0	0	0	0	0	1	1	0	0	0	0	2.8	0.7	1.6	0	0	0	0	0	1.2	1	0	0	0.5	-0.1983	0.4502
hsa-miR-514a-5p	0	0	0	1	0	0	0	3	0	0	1	1	0	0	0	0	0	0.7	0	0	0	3.3	0	0	1.2	1	0	0	0.4	0.1754	0.4503
hsa-miR-4742-5p	0	0	0	0	0	0	6	0	0	0	0	0	0	0	0	0	0	0	0	0	6.2	0	0	0	0	0	0	0	0.4	0.1226	0.4534
hsa-miR-3667-3p	0	0	0	0	0	0	0	6	0	0	0	0	0	0	0	0	0	0	0	0	0	6.6	0	0	0	0	0	0	0.5	0.1226	0.4534
hsa-miR-5001-3p	0	0	0	1	0	0	0	5	0	1	0	0	0	0	0	0	0	0.7	0	0	0	5.5	0	0.6	0	0	0	0	0.5	0.1532	0.4565
hsa-miR-624-5p	0	0	2	3	1	3	0	3	0	0	1	0	0	1	0	0	2.8	2.2	0.8	2.2	0	3.3	0	0	1.2	0	0	1.1	1	-0.233	0.4582
hsa-miR-505-5p	1	2	0	0	0	1	0	6	0	2	0	1	0	1	1	1.8	0	0	0	0.7	0	6.6	0	1.3	0	1	0	1.1	1	0.225	0.4609
hsa-miR-3059-5p	2	0	0	1	0	2	1	2	4	0	0	0	1	2	2.1	0	0	0.7	0	1.5	1	2.2	4.4	0	0	0	1.3	2.1	1.1	0.2374	0.4673
hsa-miR-877-3p	0	0	1	3	1	0	0	0	0	1	0	0	0	1	0	0	1.4	2.2	0.8	0	0	0	0	0.6	0	0	0	1.1	0.4	-0.187	0.4674
hsa-miR-548bc	1	0	0	1	1	1	0	1	0	0	0	0	0	0	1	0	0	0.7	0.8	0.7	0	1.1	0	0	0	0	0	0	0.3	-0.1833	0.4681
hsa-miR-450a-2-3p	0	0	0	0	2	0	5	0	0	1	1	0	0	0	0	0	0	0	1.6	0	5.2	0	0	0.6	1.2	0	0	0	0.6	0.1716	0.4711
hsa-miR-548ba	1	3	4	1	2	3	0	1	0	1	0	3	5	0	1	2.7	5.5	0.7	1.6	2.2	0	1.1	0	0.6	0	2.9	6.7	0	1.8	-0.2527	0.4719
hsa-miR-4677-3p	5	1	0	0	3	1	0	2	11	3	0	1	2	1	5.2	0.9	0	0	2.4	0.7	0	2.2	12.1	1.9	0	1	2.7	1.1	2.2	0.2478	0.472
hsa-miR-23a-5p	1	4	0	0	3	4	7	1	2	2	2	4	1	1	1	3.7	0	0	2.4	2.9	7.2	1.1	2.2	1.3	2.4	3.9	1.3	1.1	2.2	0.2594	0.477
hsa-miR-6803-3p	0	1	0	3	3	0	0	0	1	3	0	0	0	0	0	0.9	0	2.2	2.4	0	0	0	1.1	1.9	0	0	0	0	0.6	-0.1865	0.4833
hsa-miR-592	0	0	0	0	0	0	4	0	0	0	0	0	1	0	0	0	0	0	0	0	4.1	0	0	0	0	0	1.3	0	0.4	0.1195	0.4887
hsa-miR-3690	0	0	0	4	1	0	0	0	0	0	0	0	0	0	0	0	0	2.9	0.8	0	0	0	0	0	0	0	0	0	0.3	-0.1123	0.4914
hsa-miR-548v	2	0	1	1	0	0	0	0	0	0	0	0	0	0	2.1	0	1.4	0.7	0	0	0	0	0	0	0	0	0	0	0.3	-0.1336	0.4945
hsa-miR-6809-5p	0	2	1	1	0	0	0	0	0	0	0	0	0	0	0	1.8	1.4	0.7	0	0	0	0	0	0	0	0	0	0	0.3	-0.1318	0.4977
hsa-miR-615-3p	1	0	0	0	0	0	0	7	0	0	0	0	0	0	1	0	0	0	0	0	0	7.7	0	0	0	0	0	0	0.6	0.1235	0.499
hsa-miR-585-3p	1	2	2	0	5	0	0	9	3	8	0	0	0	3	1	1.8	2.8	0	4	0	0	9.9	3.3	5.1	0	0	0	3.2	2.2	0.222	0.5029
hsa-miR-3660	0	0	0	1	0	0	0	0	6	0	0	0	0	0	0	0	0	0.7	0	0	0	0	6.6	0	0	0	0	0	0.5	0.1179	0.5071
hsa-miR-548ar-3p	2	1	0	0	1	0	0	0	0	0	1	0	0	0	2.1	0.9	0	0	0.8	0	0	0	0	0	1.2	0	0	0	0.4	-0.1521	0.5081
hsa-miR-550a-5p	1	0	1	2	0	1	0	1	0	1	0	0	0	1	1	0	1.4	1.5	0	0.7	0	1.1	0	0.6	0	0	0	1.1	0.5	-0.1955	0.5096
hsa-miR-33b-3p	0	0	0	0	0	1	0	0	0	3	0	1	1	0	0	0	0	0	0	0.7	0	0	0	1.9	0	1	1.3	0	0.4	0.1525	0.5104
hsa-miR-3064-3p	1	1	1	1	0	4	0	0	0	0	2	1	0	2	1	0.9	1.4	0.7	0	2.9	0	0	0	0	2.4	1	0	2.1	0.9	-0.2112	0.5121
hsa-miR-3199	0	1	0	0	1	2	0	0	0	0	0	0	0	0	0	0.9	0	0	0.8	1.5	0	0	0	0	0	0	0	0	0.2	-0.1227	0.5141
hsa-miR-3190-3p	0	1	0	0	2	1	0	0	0	0	0	0	1	0	0	0.9	0	0	1.6	0.7	0	0	0	0	0	0	1.3	0	0.3	-0.149	0.5164
hsa-miR-548ay-3p	0	0	0	0	2	0	9	0	0	0	0	0	0	0	0	0	0	0	1.6	0	9.3	0	0	0	0	0	0	0	0.8	0.1201	0.5204
hsa-miR-888-5p	0	0	0	0	0	0	0	0	0	1	1	2	0	0	0	0	0	0	0	0	0	0	0	0.6	1.2	2	0	0	0.3	0.1252	0.5207
hsa-miR-6750-3p	0	0	0	0	0	0	0	0	0	1	0	1	0	2	0	0	0	0	0	0	0	0	0	0.6	0	1	0	2.1	0.3	0.1241	0.5227
hsa-miR-200c-3p	0	0	1	4	6	3	0	7	3	4	3	3	1	1	0	0	1.4	2.9	4.8	2.2	0	7.7	3.3	2.6	3.6	2.9	1.3	1.1	2.4	0.232	0.5238
hsa-miR-1185-2-3p	1	0	0	0	1	2	0	0	0	0	0	0	0	1	1	0	0	0	0.8	1.5	0	0	0	0	0	0	0	1.1	0.3	-0.1435	0.528
hsa-miR-216a-3p	0	0	2	3	1	2	0	0	7	0	1	1	3	2	0	0	2.8	2.2	0.8	1.5	0	0	7.7	0	1.2	1	4	2.1	1.7	0.2124	0.5292
hsa-miR-34c-5p	1	1	3	4	1	5	1	3	2	6	4	4	0	4	1	0.9	4.1	2.9	0.8	3.7	1	3.3	2.2	3.8	4.8	3.9	0	4.3	2.6	0.2291	0.5302
hsa-miR-6507-5p	0	2	0	2	1	1	3	0	0	0	0	0	0	0	0	1.8	0	1.5	0.8	0.7	3.1	0	0	0	0	0	0	0	0.6	-0.1672	0.5308
hsa-miR-193b-5p	0	1	0	0	1	3	0	0	0	0	3	6	1	0	0	0.9	0	0	0.8	2.2	0	0	0	0	3.6	5.9	1.3	0	1.1	0.1797	0.5326
hsa-miR-4433b-5p	0	0	3	13	3	4	0	0	5	12	1	0	0	0	0	0	4.1	9.6	2.4	2.9	0	0	5.5	7.7	1.2	0	0	0	2.4	-0.1944	0.5374
hsa-miR-4781-3p	1	1	0	0	1	1	0	0	0	1	0	0	1	0	1	0.9	0	0	0.8	0.7	0	0	0	0.6	0	0	1.3	0	0.4	-0.1687	0.54
hsa-miR-301b-3p	0	3	0	0	1	1	0	0	0	1	0	1	1	0	0	2.7	0	0	0.8	0.7	0	0	0	0.6	0	1	1.3	0	0.5	-0.1692	0.546
hsa-miR-129-5p	1	0	0	0	0	1	0	0	1	1	1	0	0	2	1	0	0	0	0	0.7	0	0	1.1	0.6	1.2	0	0	2.1	0.5	0.1677	0.5479
hsa-miR-652-5p	1	1	0	2	1	0	0	0	0	1	0	2	0	0	1	0.9	0	1.5	0.8	0	0	0	0	0.6	0	2	0	0	0.5	-0.1686	0.549
hsa-miR-2116-3p	0	5	0	3	0	0	0	0	0	3	0	0	0	2	0	4.6	0	2.2	0	0	0	0	0	1.9	0	0	0	2.1	0.8	-0.1474	0.5516
hsa-miR-1262	0	0	0	2	0	0	0	0	5	0	0	0	0	1	0	0	0	1.5	0	0	0	0	5.5	0	0	0	0	1.1	0.6	0.1239	0.5525
hsa-miR-508-3p	1	1	0	3	0	1	0	0	4	1	6	0	0	0	1	0.9	0	2.2	0	0.7	0	0	4.4	0.6	7.3	0	0	0	1.2	0.1807	0.5528
hsa-miR-1275	0	2	1	1	0	3	0	0	0	3	2	0	0	0	0	1.8	1.4	0.7	0	2.2	0	0	0	1.9	2.4	0	0	0	0.7	-0.1752	0.5532
hsa-miR-1285-3p	0	0	0	3	0	1	0	2	0	0	1	1	1	2	0	0	0	2.2	0	0.7	0	2.2	0	0	1.2	1	1.3	2.1	0.8	0.1785	0.5574
hsa-miR-16-1-3p	1	0	0	0	0	0	0	1	0	0	1	2	0	0	1	0	0	0	0	0	0	1.1	0	0	1.2	2	0	0	0.4	0.1335	0.5652
hsa-miR-548w	1	0	0	1	1	1	0	5	0	2	1	0	0	0	1	0	0	0.7	0.8	0.7	0	5.5	0	1.3	1.2	0	0	0	0.8	0.1718	0.5687
hsa-miR-548j-5p	1	0	0	3	0	1	0	8	0	0	2	0	0	0	1	0	0	2.2	0	0.7	0	8.8	0	0	2.4	0	0	0	1.1	0.1496	0.5714
hsa-miR-3688-3p	0	2	0	2	1	0	0	2	5	0	1	1	0	0	0	1.8	0	1.5	0.8	0	0	2.2	5.5	0	1.2	1	0	0	1	0.1732	0.5733
hsa-miR-619-5p	2	0	0	0	2	0	0	0	0	0	0	0	0	0	2.1	0	0	0	1.6	0	0	0	0	0	0	0	0	0	0.3	-0.0905	0.5791
hsa-miR-6894-3p	0	0	0	3	0	1	0	0	0	0	0	0	0	0	0	0	0	2.2	0	0.7	0	0	0	0	0	0	0	0	0.2	-0.0905	0.5791
hsa-miR-6820-3p	0	0	0	4	0	0	0	0	0	0	0	0	0	0	0	0	0	2.9	0	0	0	0	0	0	0	0	0	0	0.2	-0.0905	0.5791
hsa-miR-6761-5p	0	4	0	0	0	0	0	0	0	0	0	0	0	0	0	3.7	0	0	0	0	0	0	0	0	0	0	0	0	0.3	-0.0905	0.5791
hsa-miR-1291	1	1	0	0	2	0	0	0	0	3	1	0	3	1	1	0.9	0	0	1.6	0	0	0	0	1.9	1.2	0	4	1.1	0.8	0.168	0.5842
hsa-miR-6827-3p	0	0	0	0	0	0	0	0	3	0	0	0	0	1	0	0	0	0	0	0	0	0	3.3	0	0	0	0	1.1	0.3	0.0895	0.5905
hsa-miR-9983-3p	0	0	0	0	0	0	3	0	0	0	0	0	0	1	0	0	0	0	0	0	3.1	0	0	0	0	0	0	1.1	0.3	0.0877	0.5943
hsa-miR-4645-3p	1	0	0	3	0	0	0	0	0	0	0	0	1	0	1	0	0	2.2	0	0	0	0	0	0	0	0	1.3	0	0.3	-0.106	0.5945
hsa-miR-433-5p	2	0	0	3	2	0	0	0	0	1	1	1	1	1	2.1	0	0	2.2	1.6	0	0	0	0	0.6	1.2	1	1.3	1.1	0.8	-0.1706	0.5964
hsa-miR-513b-5p	0	0	0	0	1	0	0	0	0	0	5	0	0	0	0	0	0	0	0.8	0	0	0	0	0	6	0	0	0	0.5	0.0931	0.5965
hsa-miR-3140-3p	0	0	0	0	0	0	0	4	0	0	0	0	0	0	0	0	0	0	0	0	0	4.4	0	0	0	0	0	0	0.3	0.0859	0.5983
hsa-miR-5089-5p	0	0	0	0	0	0	0	0	4	0	0	0	0	0	0	0	0	0	0	0	0	0	4.4	0	0	0	0	0	0.3	0.0859	0.5983
hsa-miR-4791	0	1	0	0	0	0	0	0	0	2	1	0	0	1	0	0.9	0	0	0	0	0	0	0	1.3	1.2	0	0	1.1	0.3	0.1207	0.5986
hsa-let-7c-3p	1	0	0	5	1	3	2	0	0	10	3	2	0	1	1	0	0	3.7	0.8	2.2	2.1	0	0	6.4	3.6	2	0	1.1	1.6	0.1808	0.5994
hsa-miR-5002-5p	0	2	0	2	1	1	6	2	0	0	0	1	1	0	0	1.8	0	1.5	0.8	0.7	6.2	2.2	0	0	0	1	1.3	0	1.1	0.1684	0.6003
hsa-miR-483-3p	3	3	1	2	3	1	2	0	3	7	3	0	1	5	3.1	2.7	1.4	1.5	2.4	0.7	2.1	0	3.3	4.5	3.6	0	1.3	5.3	2.3	0.1914	0.601
hsa-miR-769-3p	0	0	0	2	0	2	0	0	0	0	0	1	0	0	0	0	0	1.5	0	1.5	0	0	0	0	0	1	0	0	0.3	-0.101	0.6056
hsa-miR-196b-5p	2	2	1	1	3	1	0	6	1	6	1	2	0	1	2.1	1.8	1.4	0.7	2.4	0.7	0	6.6	1.1	3.8	1.2	2	0	1.1	1.8	0.1857	0.6077
hsa-miR-654-5p	2	4	1	9	2	6	0	0	0	10	1	3	2	6	2.1	3.7	1.4	6.6	1.6	4.4	0	0	0	6.4	1.2	2.9	2.7	6.4	2.8	-0.1842	0.6133
hsa-miR-4685-3p	0	0	0	0	0	0	0	0	0	0	1	0	1	1	0	0	0	0	0	0	0	0	0	0	1.2	0	1.3	1.1	0.3	0.0967	0.6177
hsa-miR-618	1	0	0	1	1	5	1	2	0	2	0	0	0	1	1	0	0	0.7	0.8	3.7	1	2.2	0	1.3	0	0	0	1.1	0.8	-0.1594	0.6212
hsa-miR-299-3p	2	1	0	2	3	3	0	0	6	4	3	3	0	1	2.1	0.9	0	1.5	2.4	2.2	0	0	6.6	2.6	3.6	2.9	0	1.1	1.8	0.1765	0.6232
hsa-miR-548ah-5p	0	0	0	0	3	1	0	3	0	3	2	0	0	0	0	0	0	0	2.4	0.7	0	3.3	0	1.9	2.4	0	0	0	0.8	0.1323	0.6267
hsa-miR-18b-5p	0	0	0	0	1	1	0	4	0	1	0	0	0	0	0	0	0	0	0.8	0.7	0	4.4	0	0.6	0	0	0	0	0.5	0.1116	0.6295
hsa-miR-6733-3p	0	0	0	0	0	0	0	0	0	1	0	0	1	1	0	0	0	0	0	0	0	0	0	0.6	0	0	1.3	1.1	0.2	0.0902	0.6309
hsa-miR-7-2-3p	0	0	0	0	0	0	0	0	0	1	1	0	0	1	0	0	0	0	0	0	0	0	0	0.6	1.2	0	0	1.1	0.2	0.0881	0.6351
hsa-let-7f-2-3p	1	4	0	3	5	4	12	1	0	0	3	0	2	6	1	3.7	0	2.2	4	2.9	12.4	1.1	0	0	3.6	0	2.7	6.4	2.9	0.1657	0.6383
hsa-miR-548at-5p	0	0	0	0	0	0	0	1	0	1	0	0	0	1	0	0	0	0	0	0	0	1.1	0	0.6	0	0	0	1.1	0.2	0.0863	0.6387
hsa-miR-1248	1	2	0	0	1	4	0	0	0	1	1	1	4	5	1	1.8	0	0	0.8	2.9	0	0	0	0.6	1.2	1	5.4	5.3	1.4	0.1553	0.6428
hsa-miR-4454	0	0	1	0	1	1	0	0	0	0	0	0	0	0	0	0	1.4	0	0.8	0.7	0	0	0	0	0	0	0	0	0.2	-0.0856	0.6438
hsa-miR-4677-5p	0	0	1	1	0	1	0	0	0	0	0	0	0	0	0	0	1.4	0.7	0	0.7	0	0	0	0	0	0	0	0	0.2	-0.0851	0.6448
hsa-miR-6733-5p	2	2	0	1	0	1	4	0	0	0	0	0	0	0	2.1	1.8	0	0.7	0	0.7	4.1	0	0	0	0	0	0	0	0.7	-0.1216	0.6451
hsa-miR-548o-3p	1	1	1	2	3	1	0	4	0	4	1	2	3	0	1	0.9	1.4	1.5	2.4	0.7	0	4.4	0	2.6	1.2	2	4	0	1.6	0.1641	0.6476
hsa-miR-3157-5p	1	0	0	0	1	1	0	0	0	0	0	0	0	0	1	0	0	0	0.8	0.7	0	0	0	0	0	0	0	0	0.2	-0.0803	0.6549
hsa-miR-25-5p	0	0	2	4	2	2	0	0	5	0	0	0	0	2	0	0	2.8	2.9	1.6	1.5	0	0	5.5	0	0	0	0	2.1	1.2	-0.1328	0.6561
hsa-miR-487a-3p	4	2	4	3	3	5	0	5	2	5	2	5	1	1	4.1	1.8	5.5	2.2	2.4	3.7	0	5.5	2.2	3.2	2.4	4.9	1.3	1.1	2.9	-0.1606	0.658
hsa-miR-548d-5p	1	1	0	2	3	1	0	7	0	1	1	1	0	2	1	0.9	0	1.5	2.4	0.7	0	7.7	0	0.6	1.2	1	0	2.1	1.4	0.1518	0.658
hsa-miR-6795-3p	0	1	0	1	0	0	5	0	0	0	0	0	0	0	0	0.9	0	0.7	0	0	5.2	0	0	0	0	0	0	0	0.5	0.0886	0.6646
hsa-miR-940	0	3	3	1	4	4	0	4	0	1	2	4	2	0	0	2.7	4.1	0.7	3.2	2.9	0	4.4	0	0.6	2.4	3.9	2.7	0	2	-0.154	0.6672
hsa-miR-32-3p	1	0	0	0	6	3	2	0	0	9	3	0	2	1	1	0	0	0	4.8	2.2	2.1	0	0	5.7	3.6	0	2.7	1.1	1.7	0.1397	0.6727
hsa-miR-378a-5p	3	0	1	1	3	0	0	2	0	2	6	1	0	2	3.1	0	1.4	0.7	2.4	0	0	2.2	0	1.3	7.3	1	0	2.1	1.5	0.1425	0.6747
hsa-miR-124-3p	1	0	1	0	1	0	0	0	0	0	0	1	0	0	1	0	1.4	0	0.8	0	0	0	0	0	0	1	0	0	0.3	-0.0933	0.6779
hsa-miR-561-5p	1	1	0	0	1	0	0	0	0	0	1	0	0	0	1	0.9	0	0	0.8	0	0	0	0	0	1.2	0	0	0	0.3	-0.0925	0.6794
hsa-miR-1179	0	0	0	0	0	1	0	0	0	3	1	0	0	0	0	0	0	0	0	0.7	0	0	0	1.9	1.2	0	0	0	0.3	0.0796	0.6796
hsa-miR-141-3p	0	2	1	0	0	1	0	3	0	0	3	0	1	0	0	1.8	1.4	0	0	0.7	0	3.3	0	0	3.6	0	1.3	0	0.9	0.1182	0.6797
hsa-miR-509-5p	0	0	0	0	0	0	0	0	0	2	1	0	0	0	0	0	0	0	0	0	0	0	0	1.3	1.2	0	0	0	0.2	0.0668	0.6821
hsa-miR-6501-5p	0	0	0	0	0	0	0	0	0	2	0	0	1	0	0	0	0	0	0	0	0	0	0	1.3	0	0	1.3	0	0.2	0.0668	0.6821
hsa-miR-1976	0	0	0	0	0	0	1	2	0	0	0	0	0	0	0	0	0	0	0	0	1	2.2	0	0	0	0	0	0	0.2	0.0668	0.6821
hsa-miR-7705	0	0	0	0	0	0	0	0	0	0	0	1	2	0	0	0	0	0	0	0	0	0	0	0	0	1	2.7	0	0.3	0.0668	0.6821
hsa-miR-3679-5p	0	0	0	0	0	0	0	0	2	0	0	0	1	0	0	0	0	0	0	0	0	0	2.2	0	0	0	1.3	0	0.3	0.0668	0.6821
hsa-miR-1268a	0	0	0	0	0	0	0	0	2	0	0	0	0	1	0	0	0	0	0	0	0	0	2.2	0	0	0	0	1.1	0.2	0.0668	0.6821
hsa-miR-1268b	0	0	0	0	0	0	0	0	2	0	0	0	0	1	0	0	0	0	0	0	0	0	2.2	0	0	0	0	1.1	0.2	0.0668	0.6821
hsa-miR-4740-5p	0	0	0	0	0	0	0	0	0	1	0	0	2	0	0	0	0	0	0	0	0	0	0	0.6	0	0	2.7	0	0.2	0.0668	0.6821
hsa-miR-4781-5p	0	0	0	0	0	0	0	0	0	1	0	0	2	0	0	0	0	0	0	0	0	0	0	0.6	0	0	2.7	0	0.2	0.0668	0.6821
hsa-miR-129-2-3p	0	0	0	0	0	0	0	0	0	1	0	2	0	0	0	0	0	0	0	0	0	0	0	0.6	0	2	0	0	0.2	0.0668	0.6821
hsa-miR-192-3p	0	0	0	0	0	0	0	3	0	0	0	0	0	0	0	0	0	0	0	0	0	3.3	0	0	0	0	0	0	0.2	0.0668	0.6821
hsa-miR-3148	0	0	0	0	0	0	0	0	3	0	0	0	0	0	0	0	0	0	0	0	0	0	3.3	0	0	0	0	0	0.2	0.0668	0.6821
hsa-miR-3200-3p	2	0	3	0	2	1	1	0	0	3	2	1	0	1	2.1	0	4.1	0	1.6	0.7	1	0	0	1.9	2.4	1	0	1.1	1.1	-0.1388	0.6823
hsa-miR-1270	0	0	1	0	3	2	0	2	1	1	2	1	1	1	0	0	1.4	0	2.4	1.5	0	2.2	1.1	0.6	2.4	1	1.3	1.1	1.1	0.1405	0.6829
hsa-miR-191-3p	0	0	1	1	0	2	0	0	0	5	1	1	0	1	0	0	1.4	0.7	0	1.5	0	0	0	3.2	1.2	1	0	1.1	0.7	0.1239	0.6832
hsa-miR-758-3p	2	2	5	0	2	3	4	2	0	4	2	4	1	5	2.1	1.8	6.9	0	1.6	2.2	4.1	2.2	0	2.6	2.4	3.9	1.3	5.3	2.6	0.1476	0.6869
hsa-miR-5006-3p	0	1	0	0	1	1	0	0	0	0	0	1	0	0	0	0.9	0	0	0.8	0.7	0	0	0	0	0	1	0	0	0.2	-0.0882	0.6872
hsa-miR-597-3p	1	0	0	0	0	0	0	4	0	0	0	0	0	0	1	0	0	0	0	0	0	4.4	0	0	0	0	0	0	0.4	0.0689	0.6879
hsa-miR-663b	1	0	0	0	0	0	0	4	0	0	0	0	0	0	1	0	0	0	0	0	0	4.4	0	0	0	0	0	0	0.4	0.0689	0.6879
hsa-miR-6815-5p	2	1	0	0	0	0	0	0	0	0	0	0	0	0	2.1	0.9	0	0	0	0	0	0	0	0	0	0	0	0	0.2	-0.0653	0.6888
hsa-miR-187-3p	0	0	0	2	0	1	0	0	0	0	0	0	0	0	0	0	0	1.5	0	0.7	0	0	0	0	0	0	0	0	0.2	-0.0653	0.6888
hsa-miR-376b-5p	2	0	0	0	0	1	0	0	0	0	0	0	0	0	2.1	0	0	0	0	0.7	0	0	0	0	0	0	0	0	0.2	-0.0653	0.6888
hsa-miR-376c-5p	2	0	0	0	0	1	0	0	0	0	0	0	0	0	2.1	0	0	0	0	0.7	0	0	0	0	0	0	0	0	0.2	-0.0653	0.6888
hsa-miR-4697-3p	1	0	0	2	0	0	0	0	0	0	0	0	0	0	1	0	0	1.5	0	0	0	0	0	0	0	0	0	0	0.2	-0.0653	0.6888
hsa-miR-891a-5p	0	0	0	0	2	1	0	0	0	0	0	0	0	0	0	0	0	0	1.6	0.7	0	0	0	0	0	0	0	0	0.2	-0.0653	0.6888
hsa-miR-10393-3p	0	3	0	0	0	0	0	0	0	0	0	0	0	0	0	2.7	0	0	0	0	0	0	0	0	0	0	0	0	0.2	-0.0653	0.6888
hsa-miR-1304-5p	0	0	0	3	0	0	0	0	0	0	0	0	0	0	0	0	0	2.2	0	0	0	0	0	0	0	0	0	0	0.2	-0.0653	0.6888
hsa-miR-3941	0	0	0	3	0	0	0	0	0	0	0	0	0	0	0	0	0	2.2	0	0	0	0	0	0	0	0	0	0	0.2	-0.0653	0.6888
hsa-miR-33a-5p	2	0	0	0	3	5	2	2	0	1	3	4	1	1	2.1	0	0	0	2.4	3.7	2.1	2.2	0	0.6	3.6	3.9	1.3	1.1	1.6	0.1418	0.6891
hsa-miR-627-5p	0	0	0	2	3	3	0	1	0	1	2	1	1	0	0	0	0	1.5	2.4	2.2	0	1.1	0	0.6	2.4	1	1.3	0	0.9	-0.1291	0.6932
hsa-miR-579-3p	1	0	0	0	1	1	0	4	0	2	0	0	0	0	1	0	0	0	0.8	0.7	0	4.4	0	1.3	0	0	0	0	0.6	0.103	0.6939
hsa-miR-933	0	0	0	0	1	0	4	0	0	0	0	0	0	0	0	0	0	0	0.8	0	4.1	0	0	0	0	0	0	0	0.4	0.066	0.6946
hsa-miR-495-5p	0	0	0	0	0	1	4	0	0	0	0	0	0	0	0	0	0	0	0	0.7	4.1	0	0	0	0	0	0	0	0.3	0.0656	0.6955
hsa-miR-4443	1	0	0	1	0	0	0	0	0	0	0	2	1	1	1	0	0	0.7	0	0	0	0	0	0	0	2	1.3	1.1	0.4	0.101	0.6955
hsa-miR-1843	3	3	1	2	5	1	0	3	1	4	5	0	3	5	3.1	2.7	1.4	1.5	4	0.7	0	3.3	1.1	2.6	6	0	4	5.3	2.6	0.1416	0.699
hsa-miR-301a-5p	4	7	1	1	3	2	5	0	2	1	4	2	1	2	4.1	6.4	1.4	0.7	2.4	1.5	5.2	0	2.2	0.6	4.8	2	1.3	2.1	2.5	-0.1386	0.7049
hsa-miR-3158-3p	3	0	1	7	1	2	0	7	0	1	1	0	2	0	3.1	0	1.4	5.1	0.8	1.5	0	7.7	0	0.6	1.2	0	2.7	0	1.7	-0.1266	0.7056
hsa-miR-365a-5p	0	0	0	0	1	0	0	0	0	0	1	1	0	1	0	0	0	0	0.8	0	0	0	0	0	1.2	1	0	1.1	0.3	0.0846	0.7074
hsa-miR-548i	0	0	0	1	0	0	0	1	1	0	0	1	0	0	0	0	0	0.7	0	0	0	1.1	1.1	0	0	1	0	0	0.3	0.0835	0.7093
hsa-miR-6833-3p	1	1	0	0	0	0	0	2	0	0	0	1	0	1	1	0.9	0	0	0	0	0	2.2	0	0	0	1	0	1.1	0.4	0.0948	0.7133
hsa-miR-92a-1-5p	3	2	2	0	2	0	0	3	2	2	0	1	0	1	3.1	1.8	2.8	0	1.6	0	0	3.3	2.2	1.3	0	1	0	1.1	1.3	-0.1246	0.7175
hsa-miR-641	1	4	2	0	1	4	0	0	0	1	1	4	2	3	1	3.7	2.8	0	0.8	2.9	0	0	0	0.6	1.2	3.9	2.7	3.2	1.6	-0.126	0.7202
hsa-miR-138-5p	1	0	2	1	2	5	0	1	0	0	0	0	6	1	1	0	2.8	0.7	1.6	3.7	0	1.1	0	0	0	0	8.1	1.1	1.4	-0.1124	0.7248
hsa-miR-6756-3p	0	3	0	6	5	8	0	3	4	3	0	2	3	4	0	2.7	0	4.4	4	5.9	0	3.3	4.4	1.9	0	2	4	4.3	2.6	-0.1275	0.7269
hsa-miR-659-5p	0	2	0	0	1	0	0	0	0	0	2	0	1	2	0	1.8	0	0	0.8	0	0	0	0	0	2.4	0	1.3	2.1	0.6	0.091	0.7285
hsa-miR-4676-5p	0	0	0	2	1	0	0	0	0	0	1	0	0	0	0	0	0	1.5	0.8	0	0	0	0	0	1.2	0	0	0	0.2	-0.0647	0.7341
hsa-miR-3529-5p	0	1	0	2	0	0	0	0	0	0	0	0	0	1	0	0.9	0	1.5	0	0	0	0	0	0	0	0	0	1.1	0.2	-0.0646	0.7343
hsa-miR-4728-3p	2	2	2	1	2	2	0	1	7	2	1	3	0	2	2.1	1.8	2.8	0.7	1.6	1.5	0	1.1	7.7	1.3	1.2	2.9	0	2.1	1.9	0.1231	0.7349
hsa-miR-6806-3p	2	0	0	0	1	0	0	0	0	1	0	0	0	0	2.1	0	0	0	0.8	0	0	0	0	0.6	0	0	0	0	0.2	-0.0639	0.7358
hsa-miR-3620-3p	0	0	0	1	2	1	0	0	1	2	1	0	2	0	0	0	0	0.7	1.6	0.7	0	0	1.1	1.3	1.2	0	2.7	0	0.7	0.1019	0.7375
hsa-miR-4787-3p	1	1	0	1	0	1	0	0	0	0	0	1	2	0	1	0.9	0	0.7	0	0.7	0	0	0	0	0	1	2.7	0	0.5	-0.0935	0.7387
hsa-miR-1278	0	0	1	0	0	0	0	0	2	0	0	0	1	0	0	0	1.4	0	0	0	0	0	2.2	0	0	0	1.3	0	0.4	0.0679	0.7396
hsa-miR-676-3p	2	0	1	0	2	3	1	2	2	4	0	1	1	1	2.1	0	1.4	0	1.6	2.2	1	2.2	2.2	2.6	0	1	1.3	1.1	1.3	0.1176	0.7424
hsa-miR-7114-3p	0	0	1	0	0	0	0	2	0	0	0	1	0	0	0	0	1.4	0	0	0	0	2.2	0	0	0	1	0	0	0.3	0.0658	0.7437
hsa-miR-6883-3p	0	2	0	0	0	0	3	0	0	2	0	0	0	0	0	1.8	0	0	0	0	3.1	0	0	1.3	0	0	0	0	0.4	0.068	0.7444
hsa-miR-548k	3	2	2	2	4	6	0	1	3	8	3	1	1	3	3.1	1.8	2.8	1.5	3.2	4.4	0	1.1	3.3	5.1	3.6	1	1.3	3.2	2.5	-0.1141	0.7547
hsa-miR-1295a	0	0	0	0	1	0	0	0	0	1	2	0	0	0	0	0	0	0	0.8	0	0	0	0	0.6	2.4	0	0	0	0.3	0.0609	0.7547
hsa-miR-3126-5p	0	0	0	0	1	0	0	0	0	1	2	0	0	0	0	0	0	0	0.8	0	0	0	0	0.6	2.4	0	0	0	0.3	0.0609	0.7547
hsa-miR-7706	4	1	3	1	1	2	0	0	1	7	1	2	0	3	4.1	0.9	4.1	0.7	0.8	1.5	0	0	1.1	4.5	1.2	2	0	3.2	1.7	-0.1063	0.7664
hsa-miR-3605-3p	3	4	1	7	2	2	0	2	0	8	3	4	1	2	3.1	3.7	1.4	5.1	1.6	1.5	0	2.2	0	5.1	3.6	3.9	1.3	2.1	2.5	-0.1084	0.7673
hsa-miR-1237-3p	0	0	0	0	0	0	0	1	0	1	0	0	0	0	0	0	0	0	0	0	0	1.1	0	0.6	0	0	0	0	0.1	0.0479	0.7688
hsa-miR-3125	0	0	0	0	0	0	0	1	0	1	0	0	0	0	0	0	0	0	0	0	0	1.1	0	0.6	0	0	0	0	0.1	0.0479	0.7688
hsa-miR-6511b-5p	0	0	0	0	0	0	1	0	0	1	0	0	0	0	0	0	0	0	0	0	1	0	0	0.6	0	0	0	0	0.1	0.0479	0.7688
hsa-miR-215-3p	0	0	0	0	0	0	0	0	0	0	1	1	0	0	0	0	0	0	0	0	0	0	0	0	1.2	1	0	0	0.2	0.0479	0.7688
hsa-miR-3130-5p	0	0	0	0	0	0	0	0	0	0	1	0	1	0	0	0	0	0	0	0	0	0	0	0	1.2	0	1.3	0	0.2	0.0479	0.7688
hsa-miR-320a-5p	0	0	0	0	0	0	0	0	0	0	1	0	1	0	0	0	0	0	0	0	0	0	0	0	1.2	0	1.3	0	0.2	0.0479	0.7688
hsa-miR-4772-5p	0	0	0	0	0	0	0	0	0	0	1	0	1	0	0	0	0	0	0	0	0	0	0	0	1.2	0	1.3	0	0.2	0.0479	0.7688
hsa-miR-6757-3p	0	0	0	0	0	0	0	0	0	0	1	1	0	0	0	0	0	0	0	0	0	0	0	0	1.2	1	0	0	0.2	0.0479	0.7688
hsa-miR-6766-3p	0	0	0	0	0	0	0	0	0	0	1	1	0	0	0	0	0	0	0	0	0	0	0	0	1.2	1	0	0	0.2	0.0479	0.7688
hsa-miR-6870-3p	0	0	0	0	0	0	0	0	0	0	0	1	0	1	0	0	0	0	0	0	0	0	0	0	0	1	0	1.1	0.1	0.0479	0.7688
hsa-miR-548am-3p	0	0	0	0	0	0	1	0	0	0	0	0	0	1	0	0	0	0	0	0	1	0	0	0	0	0	0	1.1	0.1	0.0479	0.7688
hsa-miR-579-5p	0	0	0	0	0	0	0	0	0	1	0	0	0	1	0	0	0	0	0	0	0	0	0	0.6	0	0	0	1.1	0.1	0.0479	0.7688
hsa-miR-6741-3p	0	0	0	0	0	0	0	0	0	1	0	0	0	1	0	0	0	0	0	0	0	0	0	0.6	0	0	0	1.1	0.1	0.0479	0.7688
hsa-miR-181d-3p	0	0	0	0	0	0	0	0	0	0	1	0	0	1	0	0	0	0	0	0	0	0	0	0	1.2	0	0	1.1	0.2	0.0479	0.7688
hsa-miR-1273c	0	0	0	0	0	0	0	0	0	1	0	1	0	0	0	0	0	0	0	0	0	0	0	0.6	0	1	0	0	0.1	0.0479	0.7688
hsa-miR-431-3p	0	0	0	0	0	0	0	0	0	1	0	1	0	0	0	0	0	0	0	0	0	0	0	0.6	0	1	0	0	0.1	0.0479	0.7688
hsa-miR-4649-5p	0	0	0	0	0	0	0	0	0	1	0	1	0	0	0	0	0	0	0	0	0	0	0	0.6	0	1	0	0	0.1	0.0479	0.7688
hsa-miR-629-3p	0	0	0	0	0	0	0	0	0	1	0	1	0	0	0	0	0	0	0	0	0	0	0	0.6	0	1	0	0	0.1	0.0479	0.7688
hsa-miR-10395-3p	0	0	0	0	0	0	1	0	0	0	1	0	0	0	0	0	0	0	0	0	1	0	0	0	1.2	0	0	0	0.2	0.0479	0.7688
hsa-miR-9903	0	0	0	0	0	0	0	0	0	1	1	0	0	0	0	0	0	0	0	0	0	0	0	0.6	1.2	0	0	0	0.1	0.0479	0.7688
hsa-miR-188-3p	0	0	0	0	0	0	2	0	0	0	0	0	0	0	0	0	0	0	0	0	2.1	0	0	0	0	0	0	0	0.1	0.0479	0.7688
hsa-miR-526b-5p	0	0	0	0	0	0	0	2	0	0	0	0	0	0	0	0	0	0	0	0	0	2.2	0	0	0	0	0	0	0.2	0.0479	0.7688
hsa-miR-4800-3p	0	0	0	0	0	0	0	0	0	2	0	0	0	0	0	0	0	0	0	0	0	0	0	1.3	0	0	0	0	0.1	0.0479	0.7688
hsa-miR-6503-3p	0	0	0	0	0	0	0	0	0	2	0	0	0	0	0	0	0	0	0	0	0	0	0	1.3	0	0	0	0	0.1	0.0479	0.7688
hsa-miR-6727-3p	0	0	0	0	0	0	0	0	0	2	0	0	0	0	0	0	0	0	0	0	0	0	0	1.3	0	0	0	0	0.1	0.0479	0.7688
hsa-miR-6779-5p	0	0	0	0	0	0	0	0	0	2	0	0	0	0	0	0	0	0	0	0	0	0	0	1.3	0	0	0	0	0.1	0.0479	0.7688
hsa-miR-4757-3p	0	0	0	0	0	0	0	0	0	0	0	0	2	0	0	0	0	0	0	0	0	0	0	0	0	0	2.7	0	0.2	0.0479	0.7688
hsa-miR-20b-3p	0	0	0	0	0	0	0	0	0	0	0	2	0	0	0	0	0	0	0	0	0	0	0	0	0	2	0	0	0.1	0.0479	0.7688
hsa-miR-6793-3p	0	0	0	0	0	0	0	0	0	0	0	2	0	0	0	0	0	0	0	0	0	0	0	0	0	2	0	0	0.1	0.0479	0.7688
hsa-miR-103a-1-5p	0	0	0	0	0	0	0	0	0	0	2	0	0	0	0	0	0	0	0	0	0	0	0	0	2.4	0	0	0	0.2	0.0479	0.7688
hsa-miR-4477b	0	0	0	0	0	0	0	0	2	0	0	0	0	0	0	0	0	0	0	0	0	0	2.2	0	0	0	0	0	0.2	0.0479	0.7688
hsa-miR-506-3p	0	0	0	0	0	0	0	0	0	0	2	0	0	0	0	0	0	0	0	0	0	0	0	0	2.4	0	0	0	0.2	0.0479	0.7688
hsa-miR-549a-3p	0	0	0	0	0	0	0	0	0	0	2	0	0	0	0	0	0	0	0	0	0	0	0	0	2.4	0	0	0	0.2	0.0479	0.7688
hsa-miR-3187-3p	0	0	0	1	0	0	0	1	0	2	0	0	0	0	0	0	0	0.7	0	0	0	1.1	0	1.3	0	0	0	0	0.2	0.0545	0.7692
hsa-miR-376a-2-5p	0	0	0	0	1	0	0	0	0	2	0	1	0	0	0	0	0	0	0.8	0	0	0	0	1.3	0	1	0	0	0.2	0.0539	0.7704
hsa-miR-6866-5p	0	0	0	0	0	1	1	0	0	2	0	0	0	0	0	0	0	0	0	0.7	1	0	0	1.3	0	0	0	0	0.2	0.0538	0.7706
hsa-miR-6508-3p	0	0	3	0	0	0	0	0	0	1	0	0	0	0	0	0	4.1	0	0	0	0	0	0	0.6	0	0	0	0	0.3	-0.0482	0.7716
hsa-miR-3605-5p	0	3	0	0	2	0	5	0	0	1	2	0	0	0	0	2.7	0	0	1.6	0	5.2	0	0	0.6	2.4	0	0	0	0.9	0.0772	0.7738
hsa-miR-1226-3p	1	5	0	3	1	0	0	0	4	0	3	2	2	2	1	4.6	0	2.2	0.8	0	0	0	4.4	0	3.6	2	2.7	2.1	1.7	0.0966	0.7786
hsa-miR-3913-3p	0	1	0	1	0	0	0	0	0	2	0	0	0	2	0	0.9	0	0.7	0	0	0	0	0	1.3	0	0	0	2.1	0.4	0.064	0.7813
hsa-miR-1228-3p	0	2	2	1	0	1	0	0	0	1	1	2	0	2	0	1.8	2.8	0.7	0	0.7	0	0	0	0.6	1.2	2	0	2.1	0.9	-0.0866	0.788
hsa-miR-412-5p	1	3	1	4	0	0	0	0	0	8	6	0	1	0	1	2.7	1.4	2.9	0	0	0	0	0	5.1	7.3	0	1.3	0	1.6	0.0825	0.7886
hsa-miR-887-5p	0	0	0	0	1	0	0	0	0	0	3	0	0	0	0	0	0	0	0.8	0	0	0	0	0	3.6	0	0	0	0.3	0.0442	0.7918
hsa-miR-4731-5p	0	0	1	0	2	0	0	0	0	1	1	0	0	0	0	0	1.4	0	1.6	0	0	0	0	0.6	1.2	0	0	0	0.3	-0.0602	0.7927
hsa-miR-627-3p	2	1	0	0	0	0	0	0	0	1	0	0	1	0	2.1	0.9	0	0	0	0	0	0	0	0.6	0	0	1.3	0	0.4	-0.0595	0.7938
hsa-miR-511-3p	1	3	0	0	3	1	2	0	4	0	0	1	0	0	1	2.7	0	0	2.4	0.7	2.1	0	4.4	0	0	1	0	0	1	-0.079	0.7989
hsa-miR-6514-5p	0	0	0	1	0	0	0	0	0	3	0	0	0	0	0	0	0	0.7	0	0	0	0	0	1.9	0	0	0	0	0.2	0.0412	0.8005
hsa-miR-589-3p	0	2	0	0	1	2	0	2	0	0	0	0	1	1	0	1.8	0	0	0.8	1.5	0	2.2	0	0	0	0	1.3	1.1	0.6	-0.072	0.8014
hsa-miR-134-3p	2	0	1	0	0	1	0	0	0	3	0	2	1	1	2.1	0	1.4	0	0	0.7	0	0	0	1.9	0	2	1.3	1.1	0.7	0.0755	0.8049
hsa-miR-4524a-3p	0	1	1	5	0	1	0	0	3	8	1	1	0	0	0	0.9	1.4	3.7	0	0.7	0	0	3.3	5.1	1.2	1	0	0	1.2	0.0793	0.8053
hsa-miR-34b-5p	1	0	0	0	0	1	0	0	0	0	0	0	0	0	1	0	0	0	0	0.7	0	0	0	0	0	0	0	0	0.1	-0.0401	0.8056
hsa-miR-4473	1	0	0	0	0	1	0	0	0	0	0	0	0	0	1	0	0	0	0	0.7	0	0	0	0	0	0	0	0	0.1	-0.0401	0.8056
hsa-miR-449c-5p	0	0	0	0	1	1	0	0	0	0	0	0	0	0	0	0	0	0	0.8	0.7	0	0	0	0	0	0	0	0	0.1	-0.0401	0.8056
hsa-miR-4516	0	0	0	0	1	1	0	0	0	0	0	0	0	0	0	0	0	0	0.8	0.7	0	0	0	0	0	0	0	0	0.1	-0.0401	0.8056
hsa-miR-2114-5p	0	0	0	1	1	0	0	0	0	0	0	0	0	0	0	0	0	0.7	0.8	0	0	0	0	0	0	0	0	0	0.1	-0.0401	0.8056
hsa-miR-4762-5p	0	1	0	0	0	1	0	0	0	0	0	0	0	0	0	0.9	0	0	0	0.7	0	0	0	0	0	0	0	0	0.1	-0.0401	0.8056
hsa-miR-4638-3p	0	0	1	1	0	0	0	0	0	0	0	0	0	0	0	0	1.4	0.7	0	0	0	0	0	0	0	0	0	0	0.2	-0.0401	0.8056
hsa-miR-5010-5p	0	0	1	1	0	0	0	0	0	0	0	0	0	0	0	0	1.4	0.7	0	0	0	0	0	0	0	0	0	0	0.2	-0.0401	0.8056
hsa-miR-5695	0	0	1	1	0	0	0	0	0	0	0	0	0	0	0	0	1.4	0.7	0	0	0	0	0	0	0	0	0	0	0.2	-0.0401	0.8056
hsa-miR-758-5p	0	1	1	0	0	0	0	0	0	0	0	0	0	0	0	0.9	1.4	0	0	0	0	0	0	0	0	0	0	0	0.2	-0.0401	0.8056
hsa-miR-1273h-3p	0	0	1	0	1	0	0	0	0	0	0	0	0	0	0	0	1.4	0	0.8	0	0	0	0	0	0	0	0	0	0.2	-0.0401	0.8056
hsa-miR-5708	0	0	0	0	2	0	0	0	0	0	0	0	0	0	0	0	0	0	1.6	0	0	0	0	0	0	0	0	0	0.1	-0.0401	0.8056
hsa-miR-15a-3p	0	0	0	0	0	2	0	0	0	0	0	0	0	0	0	0	0	0	0	1.5	0	0	0	0	0	0	0	0	0.1	-0.0401	0.8056
hsa-miR-6874-3p	0	0	0	0	0	2	0	0	0	0	0	0	0	0	0	0	0	0	0	1.5	0	0	0	0	0	0	0	0	0.1	-0.0401	0.8056
hsa-miR-106a-3p	0	2	0	0	0	0	0	0	0	0	0	0	0	0	0	1.8	0	0	0	0	0	0	0	0	0	0	0	0	0.1	-0.0401	0.8056
hsa-miR-1233-3p	0	2	0	0	0	0	0	0	0	0	0	0	0	0	0	1.8	0	0	0	0	0	0	0	0	0	0	0	0	0.1	-0.0401	0.8056
hsa-miR-3143	0	0	0	2	0	0	0	0	0	0	0	0	0	0	0	0	0	1.5	0	0	0	0	0	0	0	0	0	0	0.1	-0.0401	0.8056
hsa-miR-3614-5p	0	0	0	2	0	0	0	0	0	0	0	0	0	0	0	0	0	1.5	0	0	0	0	0	0	0	0	0	0	0.1	-0.0401	0.8056
hsa-miR-374c-3p	2	0	0	0	0	0	0	0	0	0	0	0	0	0	2.1	0	0	0	0	0	0	0	0	0	0	0	0	0	0.1	-0.0401	0.8056
hsa-miR-4776-3p	2	0	0	0	0	0	0	0	0	0	0	0	0	0	2.1	0	0	0	0	0	0	0	0	0	0	0	0	0	0.1	-0.0401	0.8056
hsa-miR-4798-5p	0	0	0	2	0	0	0	0	0	0	0	0	0	0	0	0	0	1.5	0	0	0	0	0	0	0	0	0	0	0.1	-0.0401	0.8056
hsa-miR-548d-3p	0	0	0	2	0	0	0	0	0	0	0	0	0	0	0	0	0	1.5	0	0	0	0	0	0	0	0	0	0	0.1	-0.0401	0.8056
hsa-miR-610	0	0	0	2	0	0	0	0	0	0	0	0	0	0	0	0	0	1.5	0	0	0	0	0	0	0	0	0	0	0.1	-0.0401	0.8056
hsa-miR-6758-3p	0	0	0	2	0	0	0	0	0	0	0	0	0	0	0	0	0	1.5	0	0	0	0	0	0	0	0	0	0	0.1	-0.0401	0.8056
hsa-miR-6780b-3p	0	0	0	2	0	0	0	0	0	0	0	0	0	0	0	0	0	1.5	0	0	0	0	0	0	0	0	0	0	0.1	-0.0401	0.8056
hsa-miR-6838-5p	0	0	0	2	0	0	0	0	0	0	0	0	0	0	0	0	0	1.5	0	0	0	0	0	0	0	0	0	0	0.1	-0.0401	0.8056
hsa-miR-570-3p	0	0	0	0	0	4	0	0	5	1	0	0	0	0	0	0	0	0	0	2.9	0	0	5.5	0.6	0	0	0	0	0.6	0.051	0.8078
hsa-miR-3117-3p	0	0	2	0	1	2	6	0	1	0	0	1	0	0	0	0	2.8	0	0.8	1.5	6.2	0	1.1	0	0	1	0	0	1	0.0676	0.8116
hsa-miR-3914	0	1	0	0	1	4	0	0	1	1	0	1	2	0	0	0.9	0	0	0.8	2.9	0	0	1.1	0.6	0	1	2.7	0	0.7	-0.0719	0.812
hsa-miR-488-3p	0	0	0	3	0	1	0	0	0	1	2	0	0	0	0	0	0	2.2	0	0.7	0	0	0	0.6	2.4	0	0	0	0.4	-0.0553	0.8131
hsa-miR-5680	0	2	0	0	0	1	0	0	0	2	0	0	0	0	0	1.8	0	0	0	0.7	0	0	0	1.3	0	0	0	0	0.3	-0.0423	0.8252
hsa-miR-3940-3p	0	1	0	0	2	0	0	0	0	2	0	0	0	0	0	0.9	0	0	1.6	0	0	0	0	1.3	0	0	0	0	0.3	-0.0421	0.8255
hsa-miR-1255a	0	1	0	3	0	0	0	0	0	0	0	0	2	1	0	0.9	0	2.2	0	0	0	0	0	0	0	0	2.7	1.1	0.5	-0.0519	0.8265
hsa-miR-6511a-3p	1	0	3	3	1	1	7	0	2	0	0	3	0	1	1	0	4.1	2.2	0.8	0.7	7.2	0	2.2	0	0	2.9	0	1.1	1.6	0.0724	0.8291
hsa-miR-885-5p	1	0	0	0	0	2	0	0	0	5	0	0	1	0	1	0	0	0	0	1.5	0	0	0	3.2	0	0	1.3	0	0.5	0.0503	0.8311
hsa-miR-30b-3p	1	2	4	4	2	0	0	0	2	4	1	2	5	0	1	1.8	5.5	2.9	1.6	0	0	0	2.2	2.6	1.2	2	6.7	0	2	-0.075	0.8326
hsa-miR-375-3p	0	2	3	4	2	3	2	1	0	4	2	2	1	3	0	1.8	4.1	2.9	1.6	2.2	2.1	1.1	0	2.6	2.4	2	1.3	3.2	2	-0.0773	0.8329
hsa-miR-10527-5p	0	1	2	2	3	1	0	5	0	1	1	1	0	1	0	0.9	2.8	1.5	2.4	0.7	0	5.5	0	0.6	1.2	1	0	1.1	1.3	-0.0698	0.8396
hsa-miR-216b-5p	0	0	0	1	2	0	2	0	0	0	0	0	0	0	0	0	0	0.7	1.6	0	2.1	0	0	0	0	0	0	0	0.3	-0.0399	0.8398
hsa-miR-497-3p	1	3	1	0	1	1	0	0	0	1	1	1	3	1	1	2.7	1.4	0	0.8	0.7	0	0	0	0.6	1.2	1	4	1.1	1	-0.0639	0.8503
hsa-miR-3609	1	1	0	0	0	0	0	0	0	0	0	1	1	1	1	0.9	0	0	0	0	0	0	0	0	0	1	1.3	1.1	0.4	0.0476	0.8527
hsa-miR-1303	2	1	2	6	1	1	2	0	0	7	2	4	1	2	2.1	0.9	2.8	4.4	0.8	0.7	2.1	0	0	4.5	2.4	3.9	1.3	2.1	2	0.0656	0.8571
hsa-miR-1263	0	0	0	0	0	0	0	0	0	1	0	0	0	0	0	0	0	0	0	0	0	0	0	0.6	0	0	0	0	0	0.0291	0.8586
hsa-miR-128-1-5p	0	0	0	0	0	0	0	0	0	1	0	0	0	0	0	0	0	0	0	0	0	0	0	0.6	0	0	0	0	0	0.0291	0.8586
hsa-miR-1343-3p	0	0	0	0	0	0	0	0	0	1	0	0	0	0	0	0	0	0	0	0	0	0	0	0.6	0	0	0	0	0	0.0291	0.8586
hsa-miR-146a-3p	0	0	0	0	0	0	0	0	0	1	0	0	0	0	0	0	0	0	0	0	0	0	0	0.6	0	0	0	0	0	0.0291	0.8586
hsa-miR-219a-2-3p	0	0	0	0	0	0	0	0	0	1	0	0	0	0	0	0	0	0	0	0	0	0	0	0.6	0	0	0	0	0	0.0291	0.8586
hsa-miR-2276-5p	0	0	0	0	0	0	0	0	0	1	0	0	0	0	0	0	0	0	0	0	0	0	0	0.6	0	0	0	0	0	0.0291	0.8586
hsa-miR-3085-3p	0	0	0	0	0	0	0	1	0	0	0	0	0	0	0	0	0	0	0	0	0	1.1	0	0	0	0	0	0	0.1	0.0291	0.8586
hsa-miR-3116	0	0	0	0	0	0	0	0	0	1	0	0	0	0	0	0	0	0	0	0	0	0	0	0.6	0	0	0	0	0	0.0291	0.8586
hsa-miR-3128	0	0	0	0	0	0	0	0	0	1	0	0	0	0	0	0	0	0	0	0	0	0	0	0.6	0	0	0	0	0	0.0291	0.8586
hsa-miR-3176	0	0	0	0	0	0	0	0	0	1	0	0	0	0	0	0	0	0	0	0	0	0	0	0.6	0	0	0	0	0	0.0291	0.8586
hsa-miR-3177-3p	0	0	0	0	0	0	0	0	0	1	0	0	0	0	0	0	0	0	0	0	0	0	0	0.6	0	0	0	0	0	0.0291	0.8586
hsa-miR-3195	0	0	0	0	0	0	0	0	0	1	0	0	0	0	0	0	0	0	0	0	0	0	0	0.6	0	0	0	0	0	0.0291	0.8586
hsa-miR-363-5p	0	0	0	0	0	0	0	0	0	1	0	0	0	0	0	0	0	0	0	0	0	0	0	0.6	0	0	0	0	0	0.0291	0.8586
hsa-miR-4446-3p	0	0	0	0	0	0	0	0	0	1	0	0	0	0	0	0	0	0	0	0	0	0	0	0.6	0	0	0	0	0	0.0291	0.8586
hsa-miR-4484	0	0	0	0	0	0	0	0	0	1	0	0	0	0	0	0	0	0	0	0	0	0	0	0.6	0	0	0	0	0	0.0291	0.8586
hsa-miR-4488	0	0	0	0	0	0	0	0	0	1	0	0	0	0	0	0	0	0	0	0	0	0	0	0.6	0	0	0	0	0	0.0291	0.8586
hsa-miR-450a-1-3p	0	0	0	0	0	0	0	0	0	1	0	0	0	0	0	0	0	0	0	0	0	0	0	0.6	0	0	0	0	0	0.0291	0.8586
hsa-miR-4662a-3p	0	0	0	0	0	0	0	0	0	1	0	0	0	0	0	0	0	0	0	0	0	0	0	0.6	0	0	0	0	0	0.0291	0.8586
hsa-miR-4680-3p	0	0	0	0	0	0	0	0	0	1	0	0	0	0	0	0	0	0	0	0	0	0	0	0.6	0	0	0	0	0	0.0291	0.8586
hsa-miR-4684-3p	0	0	0	0	0	0	0	0	0	1	0	0	0	0	0	0	0	0	0	0	0	0	0	0.6	0	0	0	0	0	0.0291	0.8586
hsa-miR-4722-5p	0	0	0	0	0	0	0	0	0	1	0	0	0	0	0	0	0	0	0	0	0	0	0	0.6	0	0	0	0	0	0.0291	0.8586
hsa-miR-4725-3p	0	0	0	0	0	0	0	0	0	1	0	0	0	0	0	0	0	0	0	0	0	0	0	0.6	0	0	0	0	0	0.0291	0.8586
hsa-miR-4738-3p	0	0	0	0	0	0	0	0	0	1	0	0	0	0	0	0	0	0	0	0	0	0	0	0.6	0	0	0	0	0	0.0291	0.8586
hsa-miR-5090	0	0	0	0	0	0	0	0	0	1	0	0	0	0	0	0	0	0	0	0	0	0	0	0.6	0	0	0	0	0	0.0291	0.8586
hsa-miR-544b	0	0	0	0	0	0	0	0	0	1	0	0	0	0	0	0	0	0	0	0	0	0	0	0.6	0	0	0	0	0	0.0291	0.8586
hsa-miR-548am-5p	0	0	0	0	0	0	0	0	0	1	0	0	0	0	0	0	0	0	0	0	0	0	0	0.6	0	0	0	0	0	0.0291	0.8586
hsa-miR-548c-5p	0	0	0	0	0	0	0	0	0	1	0	0	0	0	0	0	0	0	0	0	0	0	0	0.6	0	0	0	0	0	0.0291	0.8586
hsa-miR-548o-5p	0	0	0	0	0	0	0	0	0	1	0	0	0	0	0	0	0	0	0	0	0	0	0	0.6	0	0	0	0	0	0.0291	0.8586
hsa-miR-548t-3p	0	0	0	0	0	0	0	1	0	0	0	0	0	0	0	0	0	0	0	0	0	1.1	0	0	0	0	0	0	0.1	0.0291	0.8586
hsa-miR-5582-3p	0	0	0	0	0	0	0	0	0	1	0	0	0	0	0	0	0	0	0	0	0	0	0	0.6	0	0	0	0	0	0.0291	0.8586
hsa-miR-6735-3p	0	0	0	0	0	0	0	1	0	0	0	0	0	0	0	0	0	0	0	0	0	1.1	0	0	0	0	0	0	0.1	0.0291	0.8586
hsa-miR-6743-3p	0	0	0	0	0	0	0	0	0	1	0	0	0	0	0	0	0	0	0	0	0	0	0	0.6	0	0	0	0	0	0.0291	0.8586
hsa-miR-6774-3p	0	0	0	0	0	0	0	0	0	1	0	0	0	0	0	0	0	0	0	0	0	0	0	0.6	0	0	0	0	0	0.0291	0.8586
hsa-miR-6784-3p	0	0	0	0	0	0	0	0	0	1	0	0	0	0	0	0	0	0	0	0	0	0	0	0.6	0	0	0	0	0	0.0291	0.8586
hsa-miR-6786-3p	0	0	0	0	0	0	0	0	0	1	0	0	0	0	0	0	0	0	0	0	0	0	0	0.6	0	0	0	0	0	0.0291	0.8586
hsa-miR-6816-3p	0	0	0	0	0	0	0	0	0	1	0	0	0	0	0	0	0	0	0	0	0	0	0	0.6	0	0	0	0	0	0.0291	0.8586
hsa-miR-6827-5p	0	0	0	0	0	0	0	1	0	0	0	0	0	0	0	0	0	0	0	0	0	1.1	0	0	0	0	0	0	0.1	0.0291	0.8586
hsa-miR-6885-5p	0	0	0	0	0	0	0	0	0	1	0	0	0	0	0	0	0	0	0	0	0	0	0	0.6	0	0	0	0	0	0.0291	0.8586
hsa-miR-6886-5p	0	0	0	0	0	0	0	0	0	1	0	0	0	0	0	0	0	0	0	0	0	0	0	0.6	0	0	0	0	0	0.0291	0.8586
hsa-miR-7156-5p	0	0	0	0	0	0	0	0	0	1	0	0	0	0	0	0	0	0	0	0	0	0	0	0.6	0	0	0	0	0	0.0291	0.8586
hsa-miR-7975	0	0	0	0	0	0	0	0	0	1	0	0	0	0	0	0	0	0	0	0	0	0	0	0.6	0	0	0	0	0	0.0291	0.8586
hsa-miR-873-3p	0	0	0	0	0	0	0	0	0	1	0	0	0	0	0	0	0	0	0	0	0	0	0	0.6	0	0	0	0	0	0.0291	0.8586
hsa-miR-875-5p	0	0	0	0	0	0	0	0	0	1	0	0	0	0	0	0	0	0	0	0	0	0	0	0.6	0	0	0	0	0	0.0291	0.8586
hsa-miR-891b	0	0	0	0	0	0	0	0	0	1	0	0	0	0	0	0	0	0	0	0	0	0	0	0.6	0	0	0	0	0	0.0291	0.8586
hsa-miR-892b	0	0	0	0	0	0	0	0	0	1	0	0	0	0	0	0	0	0	0	0	0	0	0	0.6	0	0	0	0	0	0.0291	0.8586
hsa-miR-939-5p	0	0	0	0	0	0	0	0	0	1	0	0	0	0	0	0	0	0	0	0	0	0	0	0.6	0	0	0	0	0	0.0291	0.8586
hsa-miR-1914-5p	0	0	0	0	0	0	0	0	0	0	0	0	0	1	0	0	0	0	0	0	0	0	0	0	0	0	0	1.1	0.1	0.0291	0.8586
hsa-miR-373-3p	0	0	0	0	0	0	0	0	0	0	0	0	0	1	0	0	0	0	0	0	0	0	0	0	0	0	0	1.1	0.1	0.0291	0.8586
hsa-miR-4429	0	0	0	0	0	0	0	0	0	0	0	0	0	1	0	0	0	0	0	0	0	0	0	0	0	0	0	1.1	0.1	0.0291	0.8586
hsa-miR-4646-3p	0	0	0	0	0	0	0	0	0	0	0	0	0	1	0	0	0	0	0	0	0	0	0	0	0	0	0	1.1	0.1	0.0291	0.8586
hsa-miR-4662b	0	0	0	0	0	0	0	0	0	0	0	0	0	1	0	0	0	0	0	0	0	0	0	0	0	0	0	1.1	0.1	0.0291	0.8586
hsa-miR-4690-3p	0	0	0	0	0	0	0	0	0	0	0	0	0	1	0	0	0	0	0	0	0	0	0	0	0	0	0	1.1	0.1	0.0291	0.8586
hsa-miR-4709-3p	0	0	0	0	0	0	0	0	0	0	0	0	0	1	0	0	0	0	0	0	0	0	0	0	0	0	0	1.1	0.1	0.0291	0.8586
hsa-miR-4757-5p	0	0	0	0	0	0	0	0	0	0	0	0	0	1	0	0	0	0	0	0	0	0	0	0	0	0	0	1.1	0.1	0.0291	0.8586
hsa-miR-4787-5p	0	0	0	0	0	0	0	0	0	0	0	0	0	1	0	0	0	0	0	0	0	0	0	0	0	0	0	1.1	0.1	0.0291	0.8586
hsa-miR-4796-5p	0	0	0	0	0	0	0	0	0	0	0	0	0	1	0	0	0	0	0	0	0	0	0	0	0	0	0	1.1	0.1	0.0291	0.8586
hsa-miR-5699-3p	0	0	0	0	0	0	0	0	0	0	0	0	0	1	0	0	0	0	0	0	0	0	0	0	0	0	0	1.1	0.1	0.0291	0.8586
hsa-miR-6780a-3p	0	0	0	0	0	0	0	0	0	0	0	0	0	1	0	0	0	0	0	0	0	0	0	0	0	0	0	1.1	0.1	0.0291	0.8586
hsa-miR-6789-3p	0	0	0	0	0	0	0	0	0	0	0	0	0	1	0	0	0	0	0	0	0	0	0	0	0	0	0	1.1	0.1	0.0291	0.8586
hsa-miR-6875-5p	0	0	0	0	0	0	0	0	0	0	0	0	0	1	0	0	0	0	0	0	0	0	0	0	0	0	0	1.1	0.1	0.0291	0.8586
hsa-miR-216b-3p	0	0	0	0	0	0	0	0	0	0	0	1	0	0	0	0	0	0	0	0	0	0	0	0	0	1	0	0	0.1	0.0291	0.8586
hsa-miR-302a-3p	0	0	0	0	0	0	0	0	0	0	0	1	0	0	0	0	0	0	0	0	0	0	0	0	0	1	0	0	0.1	0.0291	0.8586
hsa-miR-3124-5p	0	0	0	0	0	0	0	0	0	0	0	0	1	0	0	0	0	0	0	0	0	0	0	0	0	0	1.3	0	0.1	0.0291	0.8586
hsa-miR-3180-3p	0	0	0	0	0	0	0	0	0	0	0	0	1	0	0	0	0	0	0	0	0	0	0	0	0	0	1.3	0	0.1	0.0291	0.8586
hsa-miR-3614-3p	0	0	0	0	0	0	0	0	0	0	0	0	1	0	0	0	0	0	0	0	0	0	0	0	0	0	1.3	0	0.1	0.0291	0.8586
hsa-miR-4271	0	0	0	0	0	0	0	0	0	0	0	1	0	0	0	0	0	0	0	0	0	0	0	0	0	1	0	0	0.1	0.0291	0.8586
hsa-miR-4421	0	0	0	0	0	0	0	0	0	0	0	1	0	0	0	0	0	0	0	0	0	0	0	0	0	1	0	0	0.1	0.0291	0.8586
hsa-miR-4693-3p	0	0	0	0	0	0	0	0	0	0	0	0	1	0	0	0	0	0	0	0	0	0	0	0	0	0	1.3	0	0.1	0.0291	0.8586
hsa-miR-4733-5p	0	0	0	0	0	0	0	0	0	0	0	1	0	0	0	0	0	0	0	0	0	0	0	0	0	1	0	0	0.1	0.0291	0.8586
hsa-miR-496	0	0	0	0	0	0	0	0	0	0	0	1	0	0	0	0	0	0	0	0	0	0	0	0	0	1	0	0	0.1	0.0291	0.8586
hsa-miR-545-3p	0	0	0	0	0	0	0	0	0	0	0	0	1	0	0	0	0	0	0	0	0	0	0	0	0	0	1.3	0	0.1	0.0291	0.8586
hsa-miR-548b-3p	0	0	0	0	0	0	0	0	0	0	0	0	1	0	0	0	0	0	0	0	0	0	0	0	0	0	1.3	0	0.1	0.0291	0.8586
hsa-miR-548t-5p	0	0	0	0	0	0	0	0	0	0	0	0	1	0	0	0	0	0	0	0	0	0	0	0	0	0	1.3	0	0.1	0.0291	0.8586
hsa-miR-549a-5p	0	0	0	0	0	0	0	0	0	0	0	0	1	0	0	0	0	0	0	0	0	0	0	0	0	0	1.3	0	0.1	0.0291	0.8586
hsa-miR-5699-5p	0	0	0	0	0	0	0	0	0	0	0	0	1	0	0	0	0	0	0	0	0	0	0	0	0	0	1.3	0	0.1	0.0291	0.8586
hsa-miR-6515-3p	0	0	0	0	0	0	0	0	0	0	0	1	0	0	0	0	0	0	0	0	0	0	0	0	0	1	0	0	0.1	0.0291	0.8586
hsa-miR-659-3p	0	0	0	0	0	0	0	0	0	0	0	1	0	0	0	0	0	0	0	0	0	0	0	0	0	1	0	0	0.1	0.0291	0.8586
hsa-miR-6732-3p	0	0	0	0	0	0	0	0	0	0	0	0	1	0	0	0	0	0	0	0	0	0	0	0	0	0	1.3	0	0.1	0.0291	0.8586
hsa-miR-676-5p	0	0	0	0	0	0	0	0	0	0	0	1	0	0	0	0	0	0	0	0	0	0	0	0	0	1	0	0	0.1	0.0291	0.8586
hsa-miR-6769b-3p	0	0	0	0	0	0	0	0	0	0	0	0	1	0	0	0	0	0	0	0	0	0	0	0	0	0	1.3	0	0.1	0.0291	0.8586
hsa-miR-6782-3p	0	0	0	0	0	0	0	0	0	0	0	1	0	0	0	0	0	0	0	0	0	0	0	0	0	1	0	0	0.1	0.0291	0.8586
hsa-miR-6818-3p	0	0	0	0	0	0	0	0	0	0	0	1	0	0	0	0	0	0	0	0	0	0	0	0	0	1	0	0	0.1	0.0291	0.8586
hsa-miR-6832-5p	0	0	0	0	0	0	0	0	0	0	0	1	0	0	0	0	0	0	0	0	0	0	0	0	0	1	0	0	0.1	0.0291	0.8586
hsa-miR-6845-3p	0	0	0	0	0	0	0	0	0	0	0	1	0	0	0	0	0	0	0	0	0	0	0	0	0	1	0	0	0.1	0.0291	0.8586
hsa-miR-6858-3p	0	0	0	0	0	0	0	0	0	0	0	0	1	0	0	0	0	0	0	0	0	0	0	0	0	0	1.3	0	0.1	0.0291	0.8586
hsa-miR-6858-5p	0	0	0	0	0	0	0	0	0	0	0	0	1	0	0	0	0	0	0	0	0	0	0	0	0	0	1.3	0	0.1	0.0291	0.8586
hsa-miR-6861-3p	0	0	0	0	0	0	0	0	0	0	0	1	0	0	0	0	0	0	0	0	0	0	0	0	0	1	0	0	0.1	0.0291	0.8586
hsa-miR-6882-5p	0	0	0	0	0	0	0	0	0	0	0	0	1	0	0	0	0	0	0	0	0	0	0	0	0	0	1.3	0	0.1	0.0291	0.8586
hsa-miR-7114-5p	0	0	0	0	0	0	0	0	0	0	0	1	0	0	0	0	0	0	0	0	0	0	0	0	0	1	0	0	0.1	0.0291	0.8586
hsa-miR-7151-5p	0	0	0	0	0	0	0	0	0	0	0	1	0	0	0	0	0	0	0	0	0	0	0	0	0	1	0	0	0.1	0.0291	0.8586
hsa-miR-765	0	0	0	0	0	0	0	0	0	0	0	1	0	0	0	0	0	0	0	0	0	0	0	0	0	1	0	0	0.1	0.0291	0.8586
hsa-miR-135a-2-3p	0	0	0	0	0	0	0	0	0	0	1	0	0	0	0	0	0	0	0	0	0	0	0	0	1.2	0	0	0	0.1	0.0291	0.8586
hsa-miR-147b-5p	0	0	0	0	0	0	0	0	0	0	1	0	0	0	0	0	0	0	0	0	0	0	0	0	1.2	0	0	0	0.1	0.0291	0.8586
hsa-miR-219b-3p	0	0	0	0	0	0	0	0	0	0	1	0	0	0	0	0	0	0	0	0	0	0	0	0	1.2	0	0	0	0.1	0.0291	0.8586
hsa-miR-219b-5p	0	0	0	0	0	0	0	0	0	0	1	0	0	0	0	0	0	0	0	0	0	0	0	0	1.2	0	0	0	0.1	0.0291	0.8586
hsa-miR-3129-5p	0	0	0	0	0	0	0	0	0	0	1	0	0	0	0	0	0	0	0	0	0	0	0	0	1.2	0	0	0	0.1	0.0291	0.8586
hsa-miR-3164	0	0	0	0	0	0	0	0	0	0	1	0	0	0	0	0	0	0	0	0	0	0	0	0	1.2	0	0	0	0.1	0.0291	0.8586
hsa-miR-33b-5p	0	0	0	0	0	0	0	0	1	0	0	0	0	0	0	0	0	0	0	0	0	0	1.1	0	0	0	0	0	0.1	0.0291	0.8586
hsa-miR-3616-3p	0	0	0	0	0	0	0	0	0	0	1	0	0	0	0	0	0	0	0	0	0	0	0	0	1.2	0	0	0	0.1	0.0291	0.8586
hsa-miR-4423-5p	0	0	0	0	0	0	0	0	0	0	1	0	0	0	0	0	0	0	0	0	0	0	0	0	1.2	0	0	0	0.1	0.0291	0.8586
hsa-miR-4470	0	0	0	0	0	0	0	0	0	0	1	0	0	0	0	0	0	0	0	0	0	0	0	0	1.2	0	0	0	0.1	0.0291	0.8586
hsa-miR-4661-3p	0	0	0	0	0	0	0	0	0	0	1	0	0	0	0	0	0	0	0	0	0	0	0	0	1.2	0	0	0	0.1	0.0291	0.8586
hsa-miR-513c-3p	0	0	0	0	0	0	0	0	0	0	1	0	0	0	0	0	0	0	0	0	0	0	0	0	1.2	0	0	0	0.1	0.0291	0.8586
hsa-miR-517a-3p	0	0	0	0	0	0	0	0	0	0	1	0	0	0	0	0	0	0	0	0	0	0	0	0	1.2	0	0	0	0.1	0.0291	0.8586
hsa-miR-517b-3p	0	0	0	0	0	0	0	0	0	0	1	0	0	0	0	0	0	0	0	0	0	0	0	0	1.2	0	0	0	0.1	0.0291	0.8586
hsa-miR-520c-3p	0	0	0	0	0	0	0	0	0	0	1	0	0	0	0	0	0	0	0	0	0	0	0	0	1.2	0	0	0	0.1	0.0291	0.8586
hsa-miR-584-3p	0	0	0	0	0	0	0	0	0	0	1	0	0	0	0	0	0	0	0	0	0	0	0	0	1.2	0	0	0	0.1	0.0291	0.8586
hsa-miR-6511a-5p	0	0	0	0	0	0	0	0	0	0	1	0	0	0	0	0	0	0	0	0	0	0	0	0	1.2	0	0	0	0.1	0.0291	0.8586
hsa-miR-6742-3p	0	0	0	0	0	0	0	0	0	0	1	0	0	0	0	0	0	0	0	0	0	0	0	0	1.2	0	0	0	0.1	0.0291	0.8586
hsa-miR-6757-5p	0	0	0	0	0	0	0	0	0	0	1	0	0	0	0	0	0	0	0	0	0	0	0	0	1.2	0	0	0	0.1	0.0291	0.8586
hsa-miR-6764-5p	0	0	0	0	0	0	0	0	0	0	1	0	0	0	0	0	0	0	0	0	0	0	0	0	1.2	0	0	0	0.1	0.0291	0.8586
hsa-miR-6780a-5p	0	0	0	0	0	0	0	0	1	0	0	0	0	0	0	0	0	0	0	0	0	0	1.1	0	0	0	0	0	0.1	0.0291	0.8586
hsa-miR-6892-5p	0	0	0	0	0	0	0	0	0	0	1	0	0	0	0	0	0	0	0	0	0	0	0	0	1.2	0	0	0	0.1	0.0291	0.8586
hsa-miR-766-5p	0	0	0	0	0	0	0	0	0	0	1	0	0	0	0	0	0	0	0	0	0	0	0	0	1.2	0	0	0	0.1	0.0291	0.8586
hsa-miR-7704	2	3	1	3	4	3	0	0	1	4	1	5	3	3	2.1	2.7	1.4	2.2	3.2	2.2	0	0	1.1	2.6	1.2	4.9	4	3.2	2.2	-0.0652	0.8587
hsa-miR-6716-3p	2	0	1	2	0	1	0	5	0	0	3	0	0	0	2.1	0	1.4	1.5	0	0.7	0	5.5	0	0	3.6	0	0	0	1.1	0.051	0.8593
hsa-miR-183-3p	0	0	1	0	0	0	0	1	0	0	0	0	1	0	0	0	1.4	0	0	0	0	1.1	0	0	0	0	1.3	0	0.3	0.0343	0.8619
hsa-miR-19b-1-5p	0	0	1	0	0	0	0	1	0	0	0	0	0	1	0	0	1.4	0	0	0	0	1.1	0	0	0	0	0	1.1	0.3	0.0331	0.8647
hsa-miR-324-3p	1	3	2	0	2	2	0	5	0	4	2	2	0	1	1	2.7	2.8	0	1.6	1.5	0	5.5	0	2.6	2.4	2	0	1.1	1.7	0.0595	0.8672
hsa-miR-4500	0	0	0	1	0	0	0	0	0	0	1	0	1	0	0	0	0	0.7	0	0	0	0	0	0	1.2	0	1.3	0	0.2	0.0318	0.8674
hsa-miR-410-5p	0	1	0	0	0	0	0	0	0	0	0	1	1	0	0	0.9	0	0	0	0	0	0	0	0	0	1	1.3	0	0.2	0.0316	0.8679
hsa-miR-616-3p	0	0	0	0	0	1	0	0	0	0	0	0	1	1	0	0	0	0	0	0.7	0	0	0	0	0	0	1.3	1.1	0.2	0.0311	0.8691
hsa-miR-2681-3p	1	1	0	0	0	0	0	0	0	0	0	0	1	2	1	0.9	0	0	0	0	0	0	0	0	0	0	1.3	2.1	0.4	0.0384	0.8693
hsa-miR-513a-3p	0	0	0	0	1	0	0	0	0	0	1	0	0	1	0	0	0	0	0.8	0	0	0	0	0	1.2	0	0	1.1	0.2	0.0307	0.8699
hsa-miR-1287-3p	0	0	0	0	0	1	0	0	0	0	1	0	0	1	0	0	0	0	0	0.7	0	0	0	0	1.2	0	0	1.1	0.2	0.0304	0.8706
hsa-miR-3126-3p	0	0	1	0	1	0	0	0	0	0	0	0	1	0	0	0	1.4	0	0.8	0	0	0	0	0	0	0	1.3	0	0.3	-0.0308	0.8739
hsa-miR-6515-5p	0	1	1	0	0	0	0	0	1	0	0	0	0	0	0	0.9	1.4	0	0	0	0	0	1.1	0	0	0	0	0	0.2	-0.0301	0.8752
hsa-miR-3179	0	1	0	0	0	0	0	0	0	1	0	0	0	1	0	0.9	0	0	0	0	0	0	0	0.6	0	0	0	1.1	0.2	0.0283	0.8754
hsa-miR-3648	0	1	1	0	0	0	0	0	0	0	0	0	0	1	0	0.9	1.4	0	0	0	0	0	0	0	0	0	0	1.1	0.2	-0.03	0.8756
hsa-miR-1255b-5p	0	0	1	0	0	1	0	0	0	0	1	0	0	0	0	0	1.4	0	0	0.7	0	0	0	0	1.2	0	0	0	0.2	-0.0299	0.8757
hsa-miR-636	0	0	0	1	0	0	0	0	0	1	1	0	0	0	0	0	0	0.7	0	0	0	0	0	0.6	1.2	0	0	0	0.2	0.0282	0.8758
hsa-miR-1-5p	1	0	0	0	1	0	0	0	0	0	0	0	1	0	1	0	0	0	0.8	0	0	0	0	0	0	0	1.3	0	0.2	-0.0292	0.8773
hsa-miR-184	0	3	0	3	2	4	5	0	4	1	3	1	0	0	0	2.7	0	2.2	1.6	2.9	5.2	0	4.4	0.6	3.6	1	0	0	1.7	0.0539	0.8773
hsa-miR-6770-3p	0	0	0	1	0	0	0	0	0	1	0	0	0	1	0	0	0	0.7	0	0	0	0	0	0.6	0	0	0	1.1	0.2	0.0273	0.8778
hsa-miR-6815-3p	1	1	0	0	0	0	0	0	0	0	0	0	0	1	1	0.9	0	0	0	0	0	0	0	0	0	0	0	1.1	0.2	-0.0284	0.879
hsa-miR-5000-3p	1	0	0	1	0	0	0	0	0	0	1	0	0	0	1	0	0	0.7	0	0	0	0	0	0	1.2	0	0	0	0.2	-0.0283	0.8794
hsa-miR-2277-3p	1	0	0	0	0	1	0	0	0	0	1	0	0	0	1	0	0	0	0	0.7	0	0	0	0	1.2	0	0	0	0.2	-0.0283	0.8794
hsa-miR-380-5p	1	0	0	0	1	0	0	0	0	0	0	0	0	1	1	0	0	0	0.8	0	0	0	0	0	0	0	0	1.1	0.2	-0.0279	0.8804
hsa-miR-2278	0	0	0	1	1	0	0	0	0	0	0	0	1	0	0	0	0	0.7	0.8	0	0	0	0	0	0	0	1.3	0	0.2	-0.0278	0.8806
hsa-miR-4795-5p	0	0	0	1	1	0	0	0	0	0	0	0	1	0	0	0	0	0.7	0.8	0	0	0	0	0	0	0	1.3	0	0.2	-0.0278	0.8806
hsa-miR-6866-3p	1	0	0	1	0	0	0	0	0	0	0	0	0	1	1	0	0	0.7	0	0	0	0	0	0	0	0	0	1.1	0.2	-0.0276	0.881
hsa-miR-585-5p	0	0	1	0	1	0	0	0	0	1	0	0	0	0	0	0	1.4	0	0.8	0	0	0	0	0.6	0	0	0	0	0.2	-0.0275	0.8812
hsa-miR-7151-3p	0	0	0	0	1	1	0	0	0	0	1	0	0	0	0	0	0	0	0.8	0.7	0	0	0	0	1.2	0	0	0	0.2	-0.0271	0.8821
hsa-miR-642a-3p	0	1	0	0	1	0	0	0	0	0	0	1	0	0	0	0.9	0	0	0.8	0	0	0	0	0	0	1	0	0	0.2	-0.0269	0.8827
hsa-miR-1277-3p	2	2	0	0	2	4	4	0	2	1	0	0	1	2	2.1	1.8	0	0	1.6	2.9	4.1	0	2.2	0.6	0	0	1.3	2.1	1.3	-0.051	0.8828
hsa-miR-3611	1	1	0	0	0	0	0	0	0	1	0	0	2	0	1	0.9	0	0	0	0	0	0	0	0.6	0	0	2.7	0	0.4	0.0342	0.8837
hsa-miR-1250-5p	0	0	0	0	1	1	0	0	0	0	0	0	0	1	0	0	0	0	0.8	0.7	0	0	0	0	0	0	0	1.1	0.2	-0.0263	0.8839
hsa-miR-4324	1	5	3	6	1	4	4	1	0	4	2	5	2	4	1	4.6	4.1	4.4	0.8	2.9	4.1	1.1	0	2.6	2.4	4.9	2.7	4.3	2.9	-0.0518	0.8868
hsa-miR-26a-1-3p	1	0	0	2	0	0	0	0	0	0	2	0	0	2	1	0	0	1.5	0	0	0	0	0	0	2.4	0	0	2.1	0.5	0.0337	0.8869
hsa-miR-548ag	0	1	0	0	1	0	0	0	0	1	0	0	0	0	0	0.9	0	0	0.8	0	0	0	0	0.6	0	0	0	0	0.2	-0.025	0.887
hsa-miR-513a-5p	0	0	1	0	0	0	0	0	0	0	2	0	0	0	0	0	1.4	0	0	0	0	0	0	0	2.4	0	0	0	0.3	0.0234	0.8874
hsa-miR-346	0	1	0	0	0	0	0	0	0	2	0	0	0	0	0	0.9	0	0	0	0	0	0	0	1.3	0	0	0	0	0.2	0.0228	0.889
hsa-miR-3934-5p	0	0	0	1	0	0	0	0	0	2	0	0	0	0	0	0	0	0.7	0	0	0	0	0	1.3	0	0	0	0	0.1	0.0228	0.889
hsa-miR-548ab	0	0	1	0	0	0	0	2	0	0	0	0	0	0	0	0	1.4	0	0	0	0	2.2	0	0	0	0	0	0	0.3	0.0228	0.889
hsa-miR-6799-3p	0	0	1	0	0	0	0	2	0	0	0	0	0	0	0	0	1.4	0	0	0	0	2.2	0	0	0	0	0	0	0.3	0.0228	0.889
hsa-miR-935	0	0	1	0	0	0	0	2	0	0	0	0	0	0	0	0	1.4	0	0	0	0	2.2	0	0	0	0	0	0	0.3	0.0228	0.889
hsa-miR-218-1-3p	0	0	0	0	1	1	0	0	0	1	0	0	0	0	0	0	0	0	0.8	0.7	0	0	0	0.6	0	0	0	0	0.2	-0.024	0.8895
hsa-miR-487a-5p	2	0	1	1	2	0	0	0	4	1	1	1	0	1	2.1	0	1.4	0.7	1.6	0	0	0	4.4	0.6	1.2	1	0	1.1	1	0.0439	0.8946
hsa-miR-212-5p	3	1	3	4	1	2	1	4	3	3	0	4	1	2	3.1	0.9	4.1	2.9	0.8	1.5	1	4.4	3.3	1.9	0	3.9	1.3	2.1	2.2	0.0478	0.8961
hsa-miR-296-3p	0	0	0	2	0	0	0	0	0	1	0	0	0	0	0	0	0	1.5	0	0	0	0	0	0.6	0	0	0	0	0.2	-0.0213	0.8962
hsa-miR-4717-3p	0	0	0	2	0	0	0	0	0	1	0	0	0	0	0	0	0	1.5	0	0	0	0	0	0.6	0	0	0	0	0.2	-0.0213	0.8962
hsa-miR-548ay-5p	0	0	0	2	0	0	0	1	0	0	0	0	0	0	0	0	0	1.5	0	0	0	1.1	0	0	0	0	0	0	0.2	-0.0213	0.8962
hsa-miR-3074-3p	2	0	0	0	0	0	0	0	0	0	0	1	0	0	2.1	0	0	0	0	0	0	0	0	0	0	1	0	0	0.2	-0.0213	0.8962
hsa-miR-4707-3p	0	0	0	2	0	0	0	0	0	0	0	1	0	0	0	0	0	1.5	0	0	0	0	0	0	0	1	0	0	0.2	-0.0213	0.8962
hsa-miR-6879-3p	0	0	0	2	0	0	0	0	0	0	1	0	0	0	0	0	0	1.5	0	0	0	0	0	0	1.2	0	0	0	0.2	-0.0213	0.8962
hsa-miR-1229-3p	2	0	0	0	0	1	0	0	0	3	0	0	0	0	2.1	0	0	0	0	0.7	0	0	0	1.9	0	0	0	0	0.3	-0.0246	0.8999
hsa-miR-668-3p	1	1	0	0	0	0	0	0	0	2	0	0	0	1	1	0.9	0	0	0	0	0	0	0	1.3	0	0	0	1.1	0.3	0.0279	0.9014
hsa-miR-378g	1	1	0	0	0	1	2	0	0	0	0	0	0	2	1	0.9	0	0	0	0.7	2.1	0	0	0	0	0	0	2.1	0.5	0.0319	0.9019
hsa-miR-1245b-5p	0	0	1	1	1	1	0	2	0	0	0	2	1	0	0	0	1.4	0.7	0.8	0.7	0	2.2	0	0	0	2	1.3	0	0.7	0.0366	0.9027
hsa-miR-4703-3p	2	0	0	0	0	0	2	0	0	1	0	0	0	0	2.1	0	0	0	0	0	2.1	0	0	0.6	0	0	0	0	0.3	0.0243	0.9038
hsa-miR-6791-3p	1	1	0	0	1	1	2	0	0	0	0	1	1	0	1	0.9	0	0	0.8	0.7	2.1	0	0	0	0	1	1.3	0	0.6	-0.0357	0.904
hsa-miR-10401-3p	0	1	0	3	3	2	0	3	0	3	2	0	1	0	0	0.9	0	2.2	2.4	1.5	0	3.3	0	1.9	2.4	0	1.3	0	1.1	-0.0402	0.9048
hsa-miR-1225-5p	1	1	1	0	0	0	0	0	2	0	0	0	0	1	1	0.9	1.4	0	0	0	0	0	2.2	0	0	0	0	1.1	0.5	-0.0293	0.9093
hsa-miR-4670-3p	0	2	0	0	0	1	0	0	0	1	0	1	1	0	0	1.8	0	0	0	0.7	0	0	0	0.6	0	1	1.3	0	0.4	-0.0289	0.9102
hsa-miR-3129-3p	0	0	1	0	1	1	0	0	0	1	0	0	1	1	0	0	1.4	0	0.8	0.7	0	0	0	0.6	0	0	1.3	1.1	0.4	-0.0309	0.9113
hsa-miR-181b-3p	1	1	0	0	0	1	4	0	0	0	0	0	0	0	1	0.9	0	0	0	0.7	4.1	0	0	0	0	0	0	0	0.5	0.0246	0.9147
hsa-miR-3622a-3p	0	2	0	0	0	1	4	0	0	0	0	0	0	0	0	1.8	0	0	0	0.7	4.1	0	0	0	0	0	0	0	0.5	0.0218	0.9151
hsa-miR-4742-3p	0	0	0	0	1	2	0	0	0	3	0	0	0	0	0	0	0	0	0.8	1.5	0	0	0	1.9	0	0	0	0	0.3	-0.0202	0.9159
hsa-miR-34c-3p	0	1	0	1	1	2	0	0	0	5	1	0	0	0	0	0.9	0	0.7	0.8	1.5	0	0	0	3.2	1.2	0	0	0	0.6	-0.0297	0.9165
hsa-miR-378d	1	0	1	1	1	2	2	0	0	0	4	0	1	0	1	0	1.4	0.7	0.8	1.5	2.1	0	0	0	4.8	0	1.3	0	1	0.0332	0.917
hsa-miR-548aw	4	1	1	2	4	3	3	4	0	2	1	2	2	4	4.1	0.9	1.4	1.5	3.2	2.2	3.1	4.4	0	1.3	1.2	2	2.7	4.3	2.3	0.0368	0.92
hsa-miR-3622a-5p	0	4	1	4	1	5	0	0	2	3	1	7	2	1	0	3.7	1.4	2.9	0.8	3.7	0	0	2.2	1.9	1.2	6.9	2.7	1.1	2	-0.0348	0.9233
hsa-miR-548ad-5p	0	2	0	0	1	0	0	0	0	0	1	0	1	1	0	1.8	0	0	0.8	0	0	0	0	0	1.2	0	1.3	1.1	0.4	-0.0243	0.9249
hsa-miR-3145-3p	0	0	1	0	0	0	0	0	0	0	0	0	0	0	0	0	1.4	0	0	0	0	0	0	0	0	0	0	0	0.1	-0.015	0.9268
hsa-miR-3617-3p	0	0	1	0	0	0	0	0	0	0	0	0	0	0	0	0	1.4	0	0	0	0	0	0	0	0	0	0	0	0.1	-0.015	0.9268
hsa-miR-3917	0	0	1	0	0	0	0	0	0	0	0	0	0	0	0	0	1.4	0	0	0	0	0	0	0	0	0	0	0	0.1	-0.015	0.9268
hsa-miR-3944-5p	0	0	1	0	0	0	0	0	0	0	0	0	0	0	0	0	1.4	0	0	0	0	0	0	0	0	0	0	0	0.1	-0.015	0.9268
hsa-miR-466	0	0	1	0	0	0	0	0	0	0	0	0	0	0	0	0	1.4	0	0	0	0	0	0	0	0	0	0	0	0.1	-0.015	0.9268
hsa-miR-4766-3p	0	0	1	0	0	0	0	0	0	0	0	0	0	0	0	0	1.4	0	0	0	0	0	0	0	0	0	0	0	0.1	-0.015	0.9268
hsa-miR-4777-3p	0	0	1	0	0	0	0	0	0	0	0	0	0	0	0	0	1.4	0	0	0	0	0	0	0	0	0	0	0	0.1	-0.015	0.9268
hsa-miR-5581-3p	0	0	1	0	0	0	0	0	0	0	0	0	0	0	0	0	1.4	0	0	0	0	0	0	0	0	0	0	0	0.1	-0.015	0.9268
hsa-miR-6503-5p	0	0	1	0	0	0	0	0	0	0	0	0	0	0	0	0	1.4	0	0	0	0	0	0	0	0	0	0	0	0.1	-0.015	0.9268
hsa-miR-6504-5p	0	0	1	0	0	0	0	0	0	0	0	0	0	0	0	0	1.4	0	0	0	0	0	0	0	0	0	0	0	0.1	-0.015	0.9268
hsa-miR-6509-3p	0	0	1	0	0	0	0	0	0	0	0	0	0	0	0	0	1.4	0	0	0	0	0	0	0	0	0	0	0	0.1	-0.015	0.9268
hsa-miR-6735-5p	0	0	1	0	0	0	0	0	0	0	0	0	0	0	0	0	1.4	0	0	0	0	0	0	0	0	0	0	0	0.1	-0.015	0.9268
hsa-miR-6777-3p	0	0	1	0	0	0	0	0	0	0	0	0	0	0	0	0	1.4	0	0	0	0	0	0	0	0	0	0	0	0.1	-0.015	0.9268
hsa-miR-6795-5p	0	0	1	0	0	0	0	0	0	0	0	0	0	0	0	0	1.4	0	0	0	0	0	0	0	0	0	0	0	0.1	-0.015	0.9268
hsa-miR-6824-3p	0	0	1	0	0	0	0	0	0	0	0	0	0	0	0	0	1.4	0	0	0	0	0	0	0	0	0	0	0	0.1	-0.015	0.9268
hsa-miR-6854-5p	0	0	1	0	0	0	0	0	0	0	0	0	0	0	0	0	1.4	0	0	0	0	0	0	0	0	0	0	0	0.1	-0.015	0.9268
hsa-miR-6855-3p	0	0	1	0	0	0	0	0	0	0	0	0	0	0	0	0	1.4	0	0	0	0	0	0	0	0	0	0	0	0.1	-0.015	0.9268
hsa-miR-7155-5p	0	0	1	0	0	0	0	0	0	0	0	0	0	0	0	0	1.4	0	0	0	0	0	0	0	0	0	0	0	0.1	-0.015	0.9268
hsa-miR-1197	0	0	0	0	0	1	0	0	0	0	0	0	0	0	0	0	0	0	0	0.7	0	0	0	0	0	0	0	0	0.1	-0.015	0.9268
hsa-miR-1224-3p	0	0	0	0	0	1	0	0	0	0	0	0	0	0	0	0	0	0	0	0.7	0	0	0	0	0	0	0	0	0.1	-0.015	0.9268
hsa-miR-1236-3p	1	0	0	0	0	0	0	0	0	0	0	0	0	0	1	0	0	0	0	0	0	0	0	0	0	0	0	0	0.1	-0.015	0.9268
hsa-miR-1271-3p	0	0	0	0	0	1	0	0	0	0	0	0	0	0	0	0	0	0	0	0.7	0	0	0	0	0	0	0	0	0.1	-0.015	0.9268
hsa-miR-128-2-5p	0	0	0	0	1	0	0	0	0	0	0	0	0	0	0	0	0	0	0.8	0	0	0	0	0	0	0	0	0	0.1	-0.015	0.9268
hsa-miR-1288-3p	1	0	0	0	0	0	0	0	0	0	0	0	0	0	1	0	0	0	0	0	0	0	0	0	0	0	0	0	0.1	-0.015	0.9268
hsa-miR-1289	0	0	0	0	1	0	0	0	0	0	0	0	0	0	0	0	0	0	0.8	0	0	0	0	0	0	0	0	0	0.1	-0.015	0.9268
hsa-miR-1297	1	0	0	0	0	0	0	0	0	0	0	0	0	0	1	0	0	0	0	0	0	0	0	0	0	0	0	0	0.1	-0.015	0.9268
hsa-miR-1323	1	0	0	0	0	0	0	0	0	0	0	0	0	0	1	0	0	0	0	0	0	0	0	0	0	0	0	0	0.1	-0.015	0.9268
hsa-miR-182-3p	0	0	0	0	1	0	0	0	0	0	0	0	0	0	0	0	0	0	0.8	0	0	0	0	0	0	0	0	0	0.1	-0.015	0.9268
hsa-miR-1911-5p	1	0	0	0	0	0	0	0	0	0	0	0	0	0	1	0	0	0	0	0	0	0	0	0	0	0	0	0	0.1	-0.015	0.9268
hsa-miR-206	0	0	0	0	0	1	0	0	0	0	0	0	0	0	0	0	0	0	0	0.7	0	0	0	0	0	0	0	0	0.1	-0.015	0.9268
hsa-miR-2115-5p	1	0	0	0	0	0	0	0	0	0	0	0	0	0	1	0	0	0	0	0	0	0	0	0	0	0	0	0	0.1	-0.015	0.9268
hsa-miR-211-5p	0	0	0	0	0	1	0	0	0	0	0	0	0	0	0	0	0	0	0	0.7	0	0	0	0	0	0	0	0	0.1	-0.015	0.9268
hsa-miR-217-3p	0	0	0	0	0	1	0	0	0	0	0	0	0	0	0	0	0	0	0	0.7	0	0	0	0	0	0	0	0	0.1	-0.015	0.9268
hsa-miR-2682-3p	0	0	0	0	1	0	0	0	0	0	0	0	0	0	0	0	0	0	0.8	0	0	0	0	0	0	0	0	0	0.1	-0.015	0.9268
hsa-miR-301b-5p	0	0	0	0	0	1	0	0	0	0	0	0	0	0	0	0	0	0	0	0.7	0	0	0	0	0	0	0	0	0.1	-0.015	0.9268
hsa-miR-3130-3p	0	0	0	0	0	1	0	0	0	0	0	0	0	0	0	0	0	0	0	0.7	0	0	0	0	0	0	0	0	0.1	-0.015	0.9268
hsa-miR-31-3p	0	0	0	0	0	1	0	0	0	0	0	0	0	0	0	0	0	0	0	0.7	0	0	0	0	0	0	0	0	0.1	-0.015	0.9268
hsa-miR-3159	0	0	0	0	1	0	0	0	0	0	0	0	0	0	0	0	0	0	0.8	0	0	0	0	0	0	0	0	0	0.1	-0.015	0.9268
hsa-miR-3163	0	0	0	0	1	0	0	0	0	0	0	0	0	0	0	0	0	0	0.8	0	0	0	0	0	0	0	0	0	0.1	-0.015	0.9268
hsa-miR-3180-5p	0	0	0	0	1	0	0	0	0	0	0	0	0	0	0	0	0	0	0.8	0	0	0	0	0	0	0	0	0	0.1	-0.015	0.9268
hsa-miR-3192-5p	0	0	0	0	1	0	0	0	0	0	0	0	0	0	0	0	0	0	0.8	0	0	0	0	0	0	0	0	0	0.1	-0.015	0.9268
hsa-miR-3194-3p	0	0	0	0	1	0	0	0	0	0	0	0	0	0	0	0	0	0	0.8	0	0	0	0	0	0	0	0	0	0.1	-0.015	0.9268
hsa-miR-371a-5p	0	0	0	0	0	1	0	0	0	0	0	0	0	0	0	0	0	0	0	0.7	0	0	0	0	0	0	0	0	0.1	-0.015	0.9268
hsa-miR-4433a-5p	0	0	0	0	1	0	0	0	0	0	0	0	0	0	0	0	0	0	0.8	0	0	0	0	0	0	0	0	0	0.1	-0.015	0.9268
hsa-miR-4477a	0	0	0	0	0	1	0	0	0	0	0	0	0	0	0	0	0	0	0	0.7	0	0	0	0	0	0	0	0	0.1	-0.015	0.9268
hsa-miR-4517	0	0	0	0	1	0	0	0	0	0	0	0	0	0	0	0	0	0	0.8	0	0	0	0	0	0	0	0	0	0.1	-0.015	0.9268
hsa-miR-4635	0	0	0	0	1	0	0	0	0	0	0	0	0	0	0	0	0	0	0.8	0	0	0	0	0	0	0	0	0	0.1	-0.015	0.9268
hsa-miR-4659a-3p	0	0	0	0	0	1	0	0	0	0	0	0	0	0	0	0	0	0	0	0.7	0	0	0	0	0	0	0	0	0.1	-0.015	0.9268
hsa-miR-4696	0	0	0	0	0	1	0	0	0	0	0	0	0	0	0	0	0	0	0	0.7	0	0	0	0	0	0	0	0	0.1	-0.015	0.9268
hsa-miR-4715-5p	1	0	0	0	0	0	0	0	0	0	0	0	0	0	1	0	0	0	0	0	0	0	0	0	0	0	0	0	0.1	-0.015	0.9268
hsa-miR-4729	0	0	0	0	1	0	0	0	0	0	0	0	0	0	0	0	0	0	0.8	0	0	0	0	0	0	0	0	0	0.1	-0.015	0.9268
hsa-miR-4732-5p	0	0	0	0	1	0	0	0	0	0	0	0	0	0	0	0	0	0	0.8	0	0	0	0	0	0	0	0	0	0.1	-0.015	0.9268
hsa-miR-4767	0	0	0	0	0	1	0	0	0	0	0	0	0	0	0	0	0	0	0	0.7	0	0	0	0	0	0	0	0	0.1	-0.015	0.9268
hsa-miR-4789-5p	0	0	0	0	1	0	0	0	0	0	0	0	0	0	0	0	0	0	0.8	0	0	0	0	0	0	0	0	0	0.1	-0.015	0.9268
hsa-miR-4804-3p	1	0	0	0	0	0	0	0	0	0	0	0	0	0	1	0	0	0	0	0	0	0	0	0	0	0	0	0	0.1	-0.015	0.9268
hsa-miR-5002-3p	0	0	0	0	0	1	0	0	0	0	0	0	0	0	0	0	0	0	0	0.7	0	0	0	0	0	0	0	0	0.1	-0.015	0.9268
hsa-miR-508-5p	1	0	0	0	0	0	0	0	0	0	0	0	0	0	1	0	0	0	0	0	0	0	0	0	0	0	0	0	0.1	-0.015	0.9268
hsa-miR-515-5p	0	0	0	0	0	1	0	0	0	0	0	0	0	0	0	0	0	0	0	0.7	0	0	0	0	0	0	0	0	0.1	-0.015	0.9268
hsa-miR-5188	0	0	0	0	1	0	0	0	0	0	0	0	0	0	0	0	0	0	0.8	0	0	0	0	0	0	0	0	0	0.1	-0.015	0.9268
hsa-miR-5193	0	0	0	0	0	1	0	0	0	0	0	0	0	0	0	0	0	0	0	0.7	0	0	0	0	0	0	0	0	0.1	-0.015	0.9268
hsa-miR-5194	0	0	0	0	1	0	0	0	0	0	0	0	0	0	0	0	0	0	0.8	0	0	0	0	0	0	0	0	0	0.1	-0.015	0.9268
hsa-miR-548x-3p	0	0	0	0	1	0	0	0	0	0	0	0	0	0	0	0	0	0	0.8	0	0	0	0	0	0	0	0	0	0.1	-0.015	0.9268
hsa-miR-624-3p	0	0	0	0	1	0	0	0	0	0	0	0	0	0	0	0	0	0	0.8	0	0	0	0	0	0	0	0	0	0.1	-0.015	0.9268
hsa-miR-6731-3p	0	0	0	0	0	1	0	0	0	0	0	0	0	0	0	0	0	0	0	0.7	0	0	0	0	0	0	0	0	0.1	-0.015	0.9268
hsa-miR-6738-3p	0	0	0	0	0	1	0	0	0	0	0	0	0	0	0	0	0	0	0	0.7	0	0	0	0	0	0	0	0	0.1	-0.015	0.9268
hsa-miR-6749-3p	0	0	0	0	0	1	0	0	0	0	0	0	0	0	0	0	0	0	0	0.7	0	0	0	0	0	0	0	0	0.1	-0.015	0.9268
hsa-miR-675-5p	0	0	0	0	1	0	0	0	0	0	0	0	0	0	0	0	0	0	0.8	0	0	0	0	0	0	0	0	0	0.1	-0.015	0.9268
hsa-miR-6762-3p	0	0	0	0	0	1	0	0	0	0	0	0	0	0	0	0	0	0	0	0.7	0	0	0	0	0	0	0	0	0.1	-0.015	0.9268
hsa-miR-6764-3p	1	0	0	0	0	0	0	0	0	0	0	0	0	0	1	0	0	0	0	0	0	0	0	0	0	0	0	0	0.1	-0.015	0.9268
hsa-miR-6802-3p	1	0	0	0	0	0	0	0	0	0	0	0	0	0	1	0	0	0	0	0	0	0	0	0	0	0	0	0	0.1	-0.015	0.9268
hsa-miR-6819-3p	0	0	0	0	1	0	0	0	0	0	0	0	0	0	0	0	0	0	0.8	0	0	0	0	0	0	0	0	0	0.1	-0.015	0.9268
hsa-miR-6859-5p	1	0	0	0	0	0	0	0	0	0	0	0	0	0	1	0	0	0	0	0	0	0	0	0	0	0	0	0	0.1	-0.015	0.9268
hsa-miR-6878-5p	0	0	0	0	1	0	0	0	0	0	0	0	0	0	0	0	0	0	0.8	0	0	0	0	0	0	0	0	0	0.1	-0.015	0.9268
hsa-miR-6893-3p	0	0	0	0	1	0	0	0	0	0	0	0	0	0	0	0	0	0	0.8	0	0	0	0	0	0	0	0	0	0.1	-0.015	0.9268
hsa-miR-6895-3p	0	0	0	0	1	0	0	0	0	0	0	0	0	0	0	0	0	0	0.8	0	0	0	0	0	0	0	0	0	0.1	-0.015	0.9268
hsa-miR-7110-3p	0	0	0	0	1	0	0	0	0	0	0	0	0	0	0	0	0	0	0.8	0	0	0	0	0	0	0	0	0	0.1	-0.015	0.9268
hsa-miR-7112-3p	0	0	0	0	1	0	0	0	0	0	0	0	0	0	0	0	0	0	0.8	0	0	0	0	0	0	0	0	0	0.1	-0.015	0.9268
hsa-miR-7113-5p	0	0	0	0	0	1	0	0	0	0	0	0	0	0	0	0	0	0	0	0.7	0	0	0	0	0	0	0	0	0.1	-0.015	0.9268
hsa-miR-767-5p	0	0	0	0	1	0	0	0	0	0	0	0	0	0	0	0	0	0	0.8	0	0	0	0	0	0	0	0	0	0.1	-0.015	0.9268
hsa-miR-101-2-5p	0	0	0	1	0	0	0	0	0	0	0	0	0	0	0	0	0	0.7	0	0	0	0	0	0	0	0	0	0	0.1	-0.015	0.9268
hsa-miR-1227-3p	0	1	0	0	0	0	0	0	0	0	0	0	0	0	0	0.9	0	0	0	0	0	0	0	0	0	0	0	0	0.1	-0.015	0.9268
hsa-miR-122b-5p	0	0	0	1	0	0	0	0	0	0	0	0	0	0	0	0	0	0.7	0	0	0	0	0	0	0	0	0	0	0.1	-0.015	0.9268
hsa-miR-1258	0	1	0	0	0	0	0	0	0	0	0	0	0	0	0	0.9	0	0	0	0	0	0	0	0	0	0	0	0	0.1	-0.015	0.9268
hsa-miR-1276	0	1	0	0	0	0	0	0	0	0	0	0	0	0	0	0.9	0	0	0	0	0	0	0	0	0	0	0	0	0.1	-0.015	0.9268
hsa-miR-2115-3p	0	0	0	1	0	0	0	0	0	0	0	0	0	0	0	0	0	0.7	0	0	0	0	0	0	0	0	0	0	0.1	-0.015	0.9268
hsa-miR-302b-3p	0	1	0	0	0	0	0	0	0	0	0	0	0	0	0	0.9	0	0	0	0	0	0	0	0	0	0	0	0	0.1	-0.015	0.9268
hsa-miR-3616-5p	0	1	0	0	0	0	0	0	0	0	0	0	0	0	0	0.9	0	0	0	0	0	0	0	0	0	0	0	0	0.1	-0.015	0.9268
hsa-miR-3617-5p	0	1	0	0	0	0	0	0	0	0	0	0	0	0	0	0.9	0	0	0	0	0	0	0	0	0	0	0	0	0.1	-0.015	0.9268
hsa-miR-3619-5p	0	0	0	1	0	0	0	0	0	0	0	0	0	0	0	0	0	0.7	0	0	0	0	0	0	0	0	0	0	0.1	-0.015	0.9268
hsa-miR-3916	0	0	0	1	0	0	0	0	0	0	0	0	0	0	0	0	0	0.7	0	0	0	0	0	0	0	0	0	0	0.1	-0.015	0.9268
hsa-miR-3921	0	1	0	0	0	0	0	0	0	0	0	0	0	0	0	0.9	0	0	0	0	0	0	0	0	0	0	0	0	0.1	-0.015	0.9268
hsa-miR-4479	0	0	0	1	0	0	0	0	0	0	0	0	0	0	0	0	0	0.7	0	0	0	0	0	0	0	0	0	0	0.1	-0.015	0.9268
hsa-miR-4637	0	0	0	1	0	0	0	0	0	0	0	0	0	0	0	0	0	0.7	0	0	0	0	0	0	0	0	0	0	0.1	-0.015	0.9268
hsa-miR-4639-3p	0	0	0	1	0	0	0	0	0	0	0	0	0	0	0	0	0	0.7	0	0	0	0	0	0	0	0	0	0	0.1	-0.015	0.9268
hsa-miR-4647	0	1	0	0	0	0	0	0	0	0	0	0	0	0	0	0.9	0	0	0	0	0	0	0	0	0	0	0	0	0.1	-0.015	0.9268
hsa-miR-4661-5p	0	0	0	1	0	0	0	0	0	0	0	0	0	0	0	0	0	0.7	0	0	0	0	0	0	0	0	0	0	0.1	-0.015	0.9268
hsa-miR-4667-5p	0	0	0	1	0	0	0	0	0	0	0	0	0	0	0	0	0	0.7	0	0	0	0	0	0	0	0	0	0	0.1	-0.015	0.9268
hsa-miR-4714-3p	0	0	0	1	0	0	0	0	0	0	0	0	0	0	0	0	0	0.7	0	0	0	0	0	0	0	0	0	0	0.1	-0.015	0.9268
hsa-miR-4779	0	0	0	1	0	0	0	0	0	0	0	0	0	0	0	0	0	0.7	0	0	0	0	0	0	0	0	0	0	0.1	-0.015	0.9268
hsa-miR-487b-5p	0	1	0	0	0	0	0	0	0	0	0	0	0	0	0	0.9	0	0	0	0	0	0	0	0	0	0	0	0	0.1	-0.015	0.9268
hsa-miR-548ax	0	1	0	0	0	0	0	0	0	0	0	0	0	0	0	0.9	0	0	0	0	0	0	0	0	0	0	0	0	0.1	-0.015	0.9268
hsa-miR-548e-5p	0	0	0	1	0	0	0	0	0	0	0	0	0	0	0	0	0	0.7	0	0	0	0	0	0	0	0	0	0	0.1	-0.015	0.9268
hsa-miR-548p	0	0	0	1	0	0	0	0	0	0	0	0	0	0	0	0	0	0.7	0	0	0	0	0	0	0	0	0	0	0.1	-0.015	0.9268
hsa-miR-550a-3-5p	0	0	0	1	0	0	0	0	0	0	0	0	0	0	0	0	0	0.7	0	0	0	0	0	0	0	0	0	0	0.1	-0.015	0.9268
hsa-miR-6507-3p	0	0	0	1	0	0	0	0	0	0	0	0	0	0	0	0	0	0.7	0	0	0	0	0	0	0	0	0	0	0.1	-0.015	0.9268
hsa-miR-6737-3p	0	1	0	0	0	0	0	0	0	0	0	0	0	0	0	0.9	0	0	0	0	0	0	0	0	0	0	0	0	0.1	-0.015	0.9268
hsa-miR-6748-3p	0	0	0	1	0	0	0	0	0	0	0	0	0	0	0	0	0	0.7	0	0	0	0	0	0	0	0	0	0	0.1	-0.015	0.9268
hsa-miR-6812-3p	0	0	0	1	0	0	0	0	0	0	0	0	0	0	0	0	0	0.7	0	0	0	0	0	0	0	0	0	0	0.1	-0.015	0.9268
hsa-miR-6826-3p	0	1	0	0	0	0	0	0	0	0	0	0	0	0	0	0.9	0	0	0	0	0	0	0	0	0	0	0	0	0.1	-0.015	0.9268
hsa-miR-6838-3p	0	1	0	0	0	0	0	0	0	0	0	0	0	0	0	0.9	0	0	0	0	0	0	0	0	0	0	0	0	0.1	-0.015	0.9268
hsa-miR-876-5p	0	0	0	1	0	0	0	0	0	0	0	0	0	0	0	0	0	0.7	0	0	0	0	0	0	0	0	0	0	0.1	-0.015	0.9268
hsa-miR-934	0	0	0	1	0	0	0	0	0	0	0	0	0	0	0	0	0	0.7	0	0	0	0	0	0	0	0	0	0	0.1	-0.015	0.9268
hsa-let-7g-3p	2	1	0	4	5	2	1	4	0	1	4	1	2	1	2.1	0.9	0	2.9	4	1.5	1	4.4	0	0.6	4.8	1	2.7	1.1	1.9	-0.0326	0.9286
hsa-miR-6842-3p	0	0	0	1	0	2	0	0	0	2	0	0	2	0	0	0	0	0.7	0	1.5	0	0	0	1.3	0	0	2.7	0	0.4	0.0209	0.9295
hsa-miR-4732-3p	0	0	0	1	1	0	0	0	0	3	0	0	0	0	0	0	0	0.7	0.8	0	0	0	0	1.9	0	0	0	0	0.2	0.016	0.9312
hsa-miR-942-5p	0	0	0	2	2	0	0	0	0	1	2	1	0	0	0	0	0	1.5	1.6	0	0	0	0	0.6	2.4	1	0	0	0.5	-0.0216	0.9345
hsa-miR-4999-5p	2	0	1	0	0	3	8	0	0	0	0	0	0	0	2.1	0	1.4	0	0	2.2	8.3	0	0	0	0	0	0	0	1	0.0186	0.938
hsa-miR-2355-3p	4	1	0	0	1	3	0	2	0	2	1	2	2	2	4.1	0.9	0	0	0.8	2.2	0	2.2	0	1.3	1.2	2	2.7	2.1	1.4	0.0273	0.9383
hsa-miR-675-3p	0	4	1	0	0	1	0	0	3	2	0	0	1	1	0	3.7	1.4	0	0	0.7	0	0	3.3	1.3	0	0	1.3	1.1	0.9	-0.0225	0.9412
hsa-miR-150-3p	0	0	0	3	0	1	1	0	0	5	0	0	0	0	0	0	0	2.2	0	0.7	1	0	0	3.2	0	0	0	0	0.5	0.0173	0.9412
hsa-miR-548al	0	0	1	0	2	0	0	0	2	0	1	0	0	0	0	0	1.4	0	1.6	0	0	0	2.2	0	1.2	0	0	0	0.5	-0.0161	0.9456
hsa-miR-1299	0	4	1	1	6	0	0	4	0	1	7	0	0	0	0	3.7	1.4	0.7	4.8	0	0	4.4	0	0.6	8.5	0	0	0	1.7	-0.019	0.9502
hsa-miR-539-5p	0	2	0	8	0	2	0	0	6	5	0	1	1	1	0	1.8	0	5.9	0	1.5	0	0	6.6	3.2	0	1	1.3	1.1	1.6	0.0191	0.9534
hsa-miR-6868-3p	0	0	1	1	0	1	0	0	0	0	2	1	0	0	0	0	1.4	0.7	0	0.7	0	0	0	0	2.4	1	0	0	0.4	-0.0147	0.9549
hsa-miR-3173-5p	0	0	0	1	1	1	0	0	0	0	0	3	0	0	0	0	0	0.7	0.8	0.7	0	0	0	0	0	2.9	0	0	0.4	-0.0073	0.9742
hsa-miR-874-5p	1	0	1	4	3	10	2	0	3	3	1	8	2	2	1	0	1.4	2.9	2.4	7.3	2.1	0	3.3	1.9	1.2	7.9	2.7	2.1	2.6	0.0118	0.9743
hsa-miR-489-3p	0	0	4	8	0	0	5	5	0	2	0	2	1	0	0	0	5.5	5.9	0	0	5.2	5.5	0	1.3	0	2	1.3	0	1.9	0.0085	0.9782
hsa-miR-6500-3p	1	1	5	1	0	3	3	0	1	3	1	5	0	2	1	0.9	6.9	0.7	0	2.2	3.1	0	1.1	1.9	1.2	4.9	0	2.1	1.9	0.0089	0.9801
hsa-miR-4511	0	0	1	0	0	0	0	1	0	0	0	0	0	0	0	0	1.4	0	0	0	0	1.1	0	0	0	0	0	0	0.2	0.0039	0.9809
hsa-miR-4785	1	0	0	0	0	0	0	0	0	0	1	0	0	0	1	0	0	0	0	0	0	0	0	0	1.2	0	0	0	0.2	0.0039	0.9809
hsa-miR-590-5p	0	0	0	0	0	1	0	0	0	0	1	0	0	0	0	0	0	0	0	0.7	0	0	0	0	1.2	0	0	0	0.1	0.0039	0.9809
hsa-miR-6506-5p	0	0	0	0	0	1	0	0	0	0	1	0	0	0	0	0	0	0	0	0.7	0	0	0	0	1.2	0	0	0	0.1	0.0039	0.9809
hsa-miR-6724-5p	0	0	0	0	0	1	0	0	0	0	1	0	0	0	0	0	0	0	0	0.7	0	0	0	0	1.2	0	0	0	0.1	0.0039	0.9809
hsa-miR-6852-5p	0	0	0	0	0	1	0	0	0	0	1	0	0	0	0	0	0	0	0	0.7	0	0	0	0	1.2	0	0	0	0.1	0.0039	0.9809
hsa-miR-1234-3p	0	0	0	0	1	0	0	0	0	0	0	1	0	0	0	0	0	0	0.8	0	0	0	0	0	0	1	0	0	0.1	0.0039	0.9809
hsa-miR-3174	1	0	0	0	0	0	0	0	0	0	0	1	0	0	1	0	0	0	0	0	0	0	0	0	0	1	0	0	0.1	0.0039	0.9809
hsa-miR-3188	0	0	0	0	1	0	0	0	0	0	0	1	0	0	0	0	0	0	0.8	0	0	0	0	0	0	1	0	0	0.1	0.0039	0.9809
hsa-miR-5696	1	0	0	0	0	0	0	0	0	0	0	1	0	0	1	0	0	0	0	0	0	0	0	0	0	1	0	0	0.1	0.0039	0.9809
hsa-miR-642a-5p	0	0	0	0	1	0	0	0	0	0	0	1	0	0	0	0	0	0	0.8	0	0	0	0	0	0	1	0	0	0.1	0.0039	0.9809
hsa-miR-6747-3p	0	0	0	0	1	0	0	0	0	0	0	1	0	0	0	0	0	0	0.8	0	0	0	0	0	0	1	0	0	0.1	0.0039	0.9809
hsa-miR-6843-3p	1	0	0	0	0	0	0	0	0	0	0	1	0	0	1	0	0	0	0	0	0	0	0	0	0	1	0	0	0.1	0.0039	0.9809
hsa-miR-1284	0	0	1	0	0	0	0	0	0	0	0	1	0	0	0	0	1.4	0	0	0	0	0	0	0	0	1	0	0	0.2	0.0039	0.9809
hsa-miR-3074-5p	0	1	0	0	0	0	0	0	0	1	0	0	0	0	0	0.9	0	0	0	0	0	0	0	0.6	0	0	0	0	0.1	0.0039	0.9809
hsa-miR-4701-5p	0	0	0	1	0	0	0	0	0	1	0	0	0	0	0	0	0	0.7	0	0	0	0	0	0.6	0	0	0	0	0.1	0.0039	0.9809
hsa-miR-548f-3p	0	0	0	1	0	0	0	0	0	1	0	0	0	0	0	0	0	0.7	0	0	0	0	0	0.6	0	0	0	0	0.1	0.0039	0.9809
hsa-miR-6514-3p	0	0	0	1	0	0	0	0	0	1	0	0	0	0	0	0	0	0.7	0	0	0	0	0	0.6	0	0	0	0	0.1	0.0039	0.9809
hsa-miR-5690	0	0	0	0	0	1	0	0	0	0	0	0	0	1	0	0	0	0	0	0.7	0	0	0	0	0	0	0	1.1	0.1	0.0039	0.9809
hsa-miR-6505-3p	0	0	0	0	0	1	0	0	0	0	0	0	0	1	0	0	0	0	0	0.7	0	0	0	0	0	0	0	1.1	0.1	0.0039	0.9809
hsa-miR-6818-5p	0	0	0	0	0	1	0	0	0	0	0	0	0	1	0	0	0	0	0	0.7	0	0	0	0	0	0	0	1.1	0.1	0.0039	0.9809
hsa-miR-6857-3p	0	0	0	0	1	0	0	0	0	0	0	0	0	1	0	0	0	0	0.8	0	0	0	0	0	0	0	0	1.1	0.1	0.0039	0.9809
hsa-miR-138-1-3p	0	0	1	0	0	0	0	0	0	0	1	0	0	0	0	0	1.4	0	0	0	0	0	0	0	1.2	0	0	0	0.2	0.0039	0.9809
hsa-miR-653-5p	0	1	0	0	0	0	0	0	0	0	0	0	1	0	0	0.9	0	0	0	0	0	0	0	0	0	0	1.3	0	0.2	0.0039	0.9809
hsa-miR-6873-3p	0	1	0	0	0	0	0	0	0	0	0	1	0	0	0	0.9	0	0	0	0	0	0	0	0	0	1	0	0	0.1	0.0039	0.9809
hsa-miR-196a-5p	0	0	0	1	0	0	0	0	0	0	0	0	0	1	0	0	0	0.7	0	0	0	0	0	0	0	0	0	1.1	0.1	0.0039	0.9809
hsa-miR-1245a	0	0	0	0	0	1	0	0	0	1	0	0	0	0	0	0	0	0	0	0.7	0	0	0	0.6	0	0	0	0	0.1	0.0039	0.9809
hsa-miR-6798-3p	0	0	0	0	0	1	0	0	0	1	0	0	0	0	0	0	0	0	0	0.7	0	0	0	0.6	0	0	0	0	0.1	0.0039	0.9809
hsa-miR-6516-5p	0	1	1	0	0	0	0	0	0	1	0	0	1	0	0	0.9	1.4	0	0	0	0	0	0	0.6	0	0	1.3	0	0.3	-0.005	0.9826
hsa-miR-6726-3p	0	0	0	1	0	1	0	0	0	0	0	1	1	0	0	0	0	0.7	0	0.7	0	0	0	0	0	1	1.3	0	0.3	-0.0048	0.983
hsa-miR-3196	0	0	0	1	0	1	0	0	0	1	0	0	1	0	0	0	0	0.7	0	0.7	0	0	0	0.6	0	0	1.3	0	0.2	-0.0046	0.9834
hsa-miR-5588-5p	0	0	0	1	0	1	0	0	0	1	0	1	0	0	0	0	0	0.7	0	0.7	0	0	0	0.6	0	1	0	0	0.2	-0.0044	0.9838
hsa-miR-194-3p	2	0	0	0	0	0	0	0	0	0	0	1	1	0	2.1	0	0	0	0	0	0	0	0	0	0	1	1.3	0	0.3	-0.0037	0.9852
hsa-miR-4492	0	1	0	0	0	1	0	0	0	0	2	0	0	0	0	0.9	0	0	0	0.7	0	0	0	0	2.4	0	0	0	0.3	-0.0036	0.9855
hsa-miR-548aa	0	0	0	0	1	1	0	2	0	0	0	0	0	0	0	0	0	0	0.8	0.7	0	2.2	0	0	0	0	0	0	0.3	-0.0034	0.9858
hsa-miR-4758-3p	0	0	0	2	0	0	0	0	0	0	1	1	0	0	0	0	0	1.5	0	0	0	0	0	0	1.2	1	0	0	0.3	-0.0034	0.9859
hsa-miR-4731-3p	0	1	0	0	0	2	0	0	0	3	1	0	0	0	0	0.9	0	0	0	1.5	0	0	0	1.9	1.2	0	0	0	0.4	0.004	0.9862
hsa-miR-889-5p	0	0	0	0	2	0	0	0	0	0	0	0	2	0	0	0	0	0	1.6	0	0	0	0	0	0	0	2.7	0	0.3	-0.0025	0.9879
hsa-miR-548n	0	2	0	0	0	0	0	2	0	0	0	0	0	0	0	1.8	0	0	0	0	0	2.2	0	0	0	0	0	0	0.3	-0.0025	0.9881
hsa-miR-147b-3p	0	0	0	0	2	0	0	0	0	0	0	0	0	2	0	0	0	0	1.6	0	0	0	0	0	0	0	0	2.1	0.3	-0.0024	0.9883
hsa-miR-371b-5p	0	0	0	0	0	2	2	0	0	0	0	0	0	0	0	0	0	0	0	1.5	2.1	0	0	0	0	0	0	0	0.3	-0.0024	0.9883
hsa-miR-3152-5p	0	0	0	2	0	2	0	2	0	0	1	1	0	0	0	0	0	1.5	0	1.5	0	2.2	0	0	1.2	1	0	0	0.5	0.0012	0.9964
hsa-miR-429	1	1	1	0	5	2	0	0	2	4	0	1	2	3	1	0.9	1.4	0	4	1.5	0	0	2.2	2.6	0	1	2.7	3.2	1.5	0.0011	0.9975
hsa-miR-9-5p	118	665	53	96	133	133	76	305	205	50	47	26	25	39	122.1	608.1	73.3	70.6	105.4	97.4	78.5	336.6	225.1	31.9	56.9	25.5	33.6	41.4	118.5	-0.828
