# Supplementary material for: Tissue-Specific miRNAs Regulate the Development of Thoracic Aortic Aneurysm: The Emerging Role of KLF4 Network
Source: J Clin Med. 2019 Oct 3;8(10):1609. doi: 10.3390/jcm8101609 (PMC6832203; doi:10.3390/jcm8101609)
Supplement: Supplementary file 1 [file jcm-08-01609-s001.zip › Supplement file 2.xls]

## Sheet: miR-Seq analysis plasma
Supplement file 2. A detailed evaluation of differential miRNA-Seq data of each plasma sample assessed in the present study
			Raw read counts																				Normalized read counts																	Differential miRNA expression analysis between groups
			Normal plasma			Aneurysm operated plasma								Aneurysm plasma							Normal plasma			Aneurysm operated plasma								Aneurysm plasma						(Aneurysm/Normal)			(Aneurysm/Operated)			(Aneurysm/(Normal + Operated))
miRNA	N1	N2	N3	N4	N5	N6	N7	AN1_OP	AN2_OP	AN3_OP	AN5_OP	AN1	AN3	AN4	AN5	AN6	AN7	AN8	N1	N2	N3	N4	N5	N6	N7	AN1_OP	AN2_OP	AN3_OP	AN5_OP	AN1	AN3	AN4	AN5	AN6	AN7	AN8	baseMean	LogFoldChange	P value	Adjusted P value	LogFoldChange	P value	Adjusted P value	LogFoldChange	P value	Adjusted P value
hsa-miR-34a-5p	52	1	0	3	177	210	1	0	1	1	17	0	2	0	0	0	0	0	52.9	0.7	0	2.1	139.3	226.8	1.1	0	1.2	1.6	8.6	0	1.3	0	0	0	0	0	24.2	-6.169	0	0.0133	-2.271	0.1992	0.9694	-5.6036	0.0001	0.049
hsa-miR-143-3p	5518	5998	16282	14145	284885	732229	7127	5275	5594	6147	21178	6255	6322	3393	1568	11420	6888	9803	5613.9	4027.1	8807.9	10109.6	224206	790813	7819.5	5482.8	6637.9	9770.6	10731.8	7175.7	4130.9	4140.6	3803.4	11787.1	7008.7	8687.6	19311.5	-4.1487	0	0.0133	-0.2734	0.6205	0.9694	-1.9359	0.0124	0.8745
hsa-miR-145-5p	41	170	348	290	2859	5628	51	129	59	0	325	90	156	11	0	50	7	118	41.7	114.1	188.3	207.3	2250.1	6078.3	56	134.1	70	0	164.7	103.2	101.9	13.4	0	51.6	7.1	104.6	205.7	-4.1176	0.0001	0.0319	-0.6854	0.5804	0.9694	-2.2723	0.0186	0.9729
hsa-miR-122-3p	60	100	429	51	0	0	0	0	34	0	47	0	0	0	0	0	0	0	61	67.1	232.1	36.5	0	0	0	0	40.3	0	23.8	0	0	0	0	0	0	0	25.6	-6.1153	0.0003	0.0549	-4.2023	0.0244	0.9694	-5.746	0.0002	0.0902
hsa-miR-100-5p	78	107	298	162	2861	6338	8	208	449	52	285	216	204	119	27	142	3	102	79.4	71.8	161.2	115.8	2251.6	6845.1	8.8	216.2	532.8	82.7	144.4	247.8	133.3	145.2	65.5	146.6	3.1	90.4	257.4	-3.1971	0.0026	0.3407	-0.9695	0.2811	0.9694	-1.4572	0.0725	0.9982
hsa-miR-365a-3p	0	21	80	18	16	156	0	0	2	0	28	0	10	0	0	0	0	0	0	14.1	43.3	12.9	12.6	168.5	0	0	2.4	0	14.2	0	6.5	0	0	0	0	0	15.2	-4.1235	0.0067	0.6343	-1.3787			-3.6438	0.0108	0.8424
hsa-miR-365b-3p	0	21	80	18	16	156	0	0	2	0	28	0	10	0	0	0	0	0	0	14.1	43.3	12.9	12.6	168.5	0	0	2.4	0	14.2	0	6.5	0	0	0	0	0	15.2	-4.1235	0.0067	0.6343	-1.3787			-3.6438	0.0108	0.8424
hsa-miR-455-3p	0	0	50	33	119	0	0	0	0	1	9	0	0	0	0	0	0	1	0	0	27	23.6	93.7	0	0	0	0	1.6	4.6	0	0	0	0	0	0	0.9	8.4	-4.5506	0.009	0.7399	-1.5718	0.4063	0.9694	-4.1388	0.0092	0.8424
hsa-miR-140-3p	698	931	650	1131	4900	13308	827	755	1129	413	963	586	1572	611	124	977	530	775	710.1	625.1	351.6	808.3	3856.3	14372.7	907.4	784.7	1339.7	656.5	488	672.3	1027.2	745.6	300.8	1008.4	539.3	686.8	904	-2.0037	0.01	0.7399	-0.184	0.7413	0.9694	-0.5193	0.2656	0.9982
hsa-miR-23b-5p	93	0	0	0	0	189	0	32	0	49	22	0	0	0	0	0	0	0	94.6	0	0	0	0	204.1	0	33.3	0	77.9	11.1	0	0	0	0	0	0	0	23.4	-4.6399	0.0132	0.7441	-5.4854	0.0012	0.8571	-4.8908	0.0033	0.8424
hsa-miR-218-5p	1	0	9	35	62	141	0	1	0	0	10	0	15	0	0	0	1	1	1	0	4.9	25	48.8	152.3	0	1	0	0	5.1	0	9.8	0	0	0	1	0.9	13.9	-3.5084	0.0144	0.7441	0.0578	0.9729	0.9977	-2.9694	0.0303	0.9982
hsa-miR-483-3p	175	2073	1146	302	383	203	391	467	408	22	256	180	64	121	135	205	136	167	178	1391.8	619.9	215.8	301.4	219.2	429	485.4	484.1	35	129.7	206.5	41.8	147.7	327.5	211.6	138.4	148	317.3	-1.4227	0.0146	0.7441	-0.67	0.4062	0.9694	-1.1976	0.0354	0.9982
hsa-miR-1255b-5p	0	11	0	2	20	1	305	0	0	0	25	18	14	0	28	0	367	37	0	7.4	0	1.4	15.7	1.1	334.6	0	0	0	12.7	20.6	9.1	0	67.9	0	373.4	32.8	30.6	3.1485	0.0155	0.7441	3.281	0.0454	0.9694	3.5455	0.0044	0.8424
hsa-miR-23c	0	6	13	2	19	41	0	0	1	0	12	102	1	1	1	2	1	1	0	4	7	1.4	15	44.3	0	0	1.2	0	6.1	117	0.7	1.2	2.4	2.1	1	0.9	2.6	-2.5582	0.0162	0.7441	-0.5833	0.6466	0.9694	-1.1659	0.218	0.9982
hsa-miR-23b-3p	692	2164	2346	1070	2622	6304	392	330	633	1071	2618	324	1380	956	240	382	476	847	704	1452.9	1269.1	764.7	2063.5	6808.4	430.1	343	751.1	1702.3	1326.7	371.7	901.7	1166.7	582.2	394.3	484.3	750.6	1237.1	-1.4779	0.0168	0.7441	-0.5909	0.3538	0.9694	-1.2389	0.0239	0.9982
hsa-miR-6786-3p	0	0	0	0	0	0	0	0	0	0	2	0	0	13	45	0	0	0	0	0	0	0	0	0	0	0	0	0	1	0	0	15.9	109.2	0	0	0	7	4.3659	0.0201	0.8331	2.935	0.1181	0.9694	4.0699	0.0212	0.9982
hsa-miR-196a-5p	0	0	12	12	99	0	0	0	0	1	26	0	0	0	1	0	0	0	0	0	6.5	8.6	77.9	0	0	0	0	1.6	13.2	0	0	0	2.4	0	0	0	6.1	-4.0044	0.0223	0.8363	-2.5275			-3.771	0.0169	0.9455
hsa-miR-6734-3p	90	0	2	29	0	0	0	0	0	0	5	0	0	0	0	0	0	0	91.6	0	1.1	20.7	0	0	0	0	0	0	2.5	0	0	0	0	0	0	0	1.4	-4.2072	0.0232	0.8363	-1.1361	0.5497	0.9694	-2.0294	0.2555	0.9982
hsa-miR-1227-3p	133	13	64	0	0	0	0	0	0	0	11	0	4	0	0	0	0	0	135.3	8.7	34.6	0	0	0	0	0	0	0	5.6	0	2.6	0	0	0	0	0	2.9	-3.9835	0.0247	0.8363	-1.0376	0.5832	0.9694	-2.027	0.2431	0.9982
hsa-miR-98-3p	0	4	25	3	37	0	0	0	22	0	19	0	0	0	0	0	0	0	0	2.7	13.5	2.1	29.1	0	0	0	26.1	0	9.6	0	0	0	0	0	0	0	4.6	-3.8157	0.0256	0.8363	-3.5292	0.0611	0.9694	-4.0791	0.0067	0.8424
hsa-miR-6793-3p	0	29	0	12	0	88	0	0	0	0	1	0	0	0	0	0	90	0	0	19.5	0	8.6	0	95	0	0	0	0	0.5	0	0	0	0	0	91.6	0	1.6	-3.8953	0.0265	0.8363	-0.3184	0.867	0.9694	-2.1637	0.2253	0.9982
hsa-miR-6852-5p	0	0	0	1	0	0	0	26	0	44	4	0	31	0	0	0	0	88	0	0	0	0.7	0	0	0	27	0	69.9	2	0	20.3	0	0	0	0	78	11	4.0373	0.0292	0.8817	-0.5388	0.7583	0.9694	0.44	0.7934	0.9982
hsa-miR-4306	0	0	4	4	0	0	0	0	0	0	4	16	0	7	1	62	0	0	0	0	2.2	2.9	0	0	0	0	0	0	2	18.4	0	8.5	2.4	64	0	0	5.6	3.3248	0.0324	0.8845	3.1791	0.0597	0.9694	3.5015	0.0134	0.8745
hsa-miR-30a-5p	628	1032	2837	1453	3913	5401	424	1346	676	371	1330	1323	750	347	325	848	576	393	638.9	692.9	1534.7	1038.5	3079.6	5833.1	465.2	1399	802.1	589.7	674	1517.7	490.1	423.5	788.3	875.3	586.1	348.3	1209.8	-1.3441	0.0332	0.8845	-0.2529	0.682	0.9694	-1.0582	0.053	0.9982
hsa-miR-30d-3p	0	18	1	10	29	0	0	0	0	0	12	0	0	0	54	0	0	0	0	12.1	0.5	7.1	22.8	0	0	0	0	0	6.1	0	0	0	131	0	0	0	2.7	-3.6521	0.034	0.8845	-1.8819	0.3202	0.9694	-3.2574	0.0433	0.9982
hsa-miR-1247-5p	0	0	0	17	0	85	0	0	0	0	1	0	0	0	0	0	0	0	0	0	0	12.2	0	91.8	0	0	0	0	0.5	0	0	0	0	0	0	0	0.7	-3.9552	0.0353	0.8845	-0.3184	0.867	0.9694	-1.4815	0.4069	0.9982
hsa-miR-375-3p	1169	764	2051	1558	751	1369	2764	2208	541	127	1066	856	178	303	355	615	635	150	1189.3	513	1109.5	1113.5	591	1478.5	3032.6	2295	642	201.9	540.2	982	116.3	369.8	861.1	634.8	646.1	132.9	913.9	-1.248	0.036	0.8845	-0.7414	0.3825	0.9694	-1.0854	0.0491	0.9982
hsa-miR-5196-3p	39	35	7	0	0	0	0	0	0	0	0	0	0	0	0	0	0	0	39.7	23.5	3.8	0	0	0	0	0	0	0	0	0	0	0	0	0	0	0	1.5	-3.7642	0.0408	0.967				-2.1262	0.2334	0.9982
hsa-miR-1284	0	0	9	15	0	0	44	0	0	0	7	0	0	0	0	0	0	0	0	0	4.9	10.7	0	0	48.3	0	0	0	3.5	0	0	0	0	0	0	0	1.1	-3.7286	0.0432	0.9822	-1.3962	0.4618	0.9694	-1.8294	0.3054	0.9982
hsa-miR-146b-3p	0	36	11	1	0	0	0	0	0	0	62	0	43	11	89	0	261	0	0	24.2	6	0.7	0	0	0	0	0	0	31.4	0	28.1	13.4	215.9	0	265.6	0	32.5	3.1878	0.0444	0.9822	2.1377	0.2286	0.9694	2.8878	0.0571	0.9982
hsa-miR-889-3p	0	4	42	10	0	0	0	36	0	180	18	1	252	24	0	217	0	1	0	2.7	22.7	7.1	0	0	0	37.4	0	286.1	9.1	1.1	164.7	29.3	0	224	0	0.9	43.6	2.9912	0.0475	1	-0.3492	0.8247	0.9694	0.6945	0.6261	0.9982
hsa-miR-29b-1-5p	0	60	58	0	0	0	0	14	51	0	8	0	0	0	0	0	0	0	0	40.3	31.4	0	0	0	0	14.6	60.5	0	4.1	0	0	0	0	0	0	0	8.4	-3.6489	0.0522	1	-4.963	0.0039	0.9155	-4.3503	0.0077	0.8424
hsa-miR-10527-5p	37	54	20	22	0	30	0	0	0	88	10	8	80	7	0	345	222	77	37.6	36.3	10.8	15.7	0	32.4	0	0	0	139.9	5.1	9.2	52.3	8.5	0	356.1	225.9	68.2	55.4	2.2163	0.0528	1	1.2744	0.3946	0.9694	1.797	0.1224	0.9982
hsa-miR-323a-5p	0	75	33	0	0	0	0	0	0	0	11	0	0	0	0	0	0	0	0	50.4	17.9	0	0	0	0	0	0	0	5.6	0	0	0	0	0	0	0	1.3	-3.5958	0.0557	1	-1.8008	0.3417	0.9694	-2.0016	0.2621	0.9982
hsa-miR-30b-5p	23	92	197	160	347	1573	3	97	100	46	423	40	163	128	0	1	0	72	23.4	61.8	106.6	114.4	273.1	1698.9	3.3	100.8	118.7	73.1	214.4	45.9	106.5	156.2	0	1	0	63.8	85.8	-2.2884	0.0585	1	-1.0855	0.3993	0.9694	-0.9291	0.2968	0.9982
hsa-miR-224-3p	29	52	0	0	0	0	0	0	0	0	0	0	0	0	0	0	0	0	29.5	34.9	0	0	0	0	0	0	0	0	0	0	0	0	0	0	0	0	1.6	-3.5417	0.0596	1				-2.1832	0.2211	0.9982
hsa-miR-1304-5p	0	0	0	0	0	0	0	0	0	7	1	22	0	16	0	0	0	0	0	0	0	0	0	0	0	0	0	11.1	0.5	25.2	0	19.5	0	0	0	0	3.1	3.5371	0.0601	1	0.8309	0.6479	0.9694	1.6854	0.334	0.9982
hsa-miR-6797-3p	51	0	16	0	0	0	0	0	0	0	0	0	0	0	0	0	0	0	51.9	0	8.7	0	0	0	0	0	0	0	0	0	0	0	0	0	0	0	0.5	-3.5004	0.0626	1				-1.1755	0.5107	0.9982
hsa-miR-501-5p	0	40	20	5	0	0	0	0	0	0	5	0	0	0	0	98	0	0	0	26.9	10.8	3.6	0	0	0	0	0	0	2.5	0	0	0	0	101.2	0	0	0.9	-3.2076	0.0663	1	-1.1361	0.5497	0.9694	-1.7293	0.3327	0.9982
hsa-miR-766-5p	40	0	0	17	0	0	0	0	44	0	9	0	0	0	0	0	0	0	40.7	0	0	12.2	0	0	0	0	52.2	0	4.6	0	0	0	0	0	0	0	6.1	-3.3663	0.0734	1	-3.9961	0.0335	0.9694	-3.6338	0.0349	0.9982
hsa-miR-6750-3p	42	0	0	8	0	0	0	0	0	0	0	0	0	0	0	0	0	0	42.7	0	0	5.7	0	0	0	0	0	0	0	0	0	0	0	0	0	0	0.3	-3.2859	0.0806	1				-0.8629	0.6293	0.9982
hsa-miR-140-5p	42	178	339	124	485	1516	1	42	186	0	342	2	137	89	36	136	1	211	42.7	119.5	183.4	88.6	381.7	1637.3	1.1	43.7	220.7	0	173.3	2.3	89.5	108.6	87.3	140.4	1	187	194.9	-1.8154	0.0833	1	-0.2994	0.8092	0.9694	-1.4474	0.1451	0.9982
hsa-miR-576-3p	0	0	0	0	0	0	0	0	0	6	10	0	18	17	0	0	0	0	0	0	0	0	0	0	0	0	0	9.5	5.1	0	11.8	20.7	0	0	0	0	2.6	3.2259	0.0866	1	0.2748	0.878	0.9713	1.1731	0.5006	0.9982
hsa-miR-3688-3p	36	0	0	8	0	0	0	0	0	0	6	0	0	0	0	0	0	0	36.6	0	0	5.7	0	0	0	0	0	0	3	0	0	0	0	0	0	0	0.5	-3.1579	0.0931	1	-1.2721	0.5028	0.9694	-1.1786	0.5095	0.9982
hsa-miR-4646-3p	0	44	0	18	0	0	0	0	0	6	3	0	0	0	0	0	0	0	0	29.5	0	12.9	0	0	0	0	0	9.5	1.5	0	0	0	0	0	0	0	3	-3.1419	0.0948	1	-2.3323	0.2172	0.9694	-3.0264	0.0782	0.9982
hsa-miR-27b-3p	3002	6488	12006	4866	9534	14130	3903	3982	2486	1757	8258	2907	4758	3452	1524	4090	5678	2204	3054.2	4356.1	6494.8	3477.8	7503.3	15260.5	4282.2	4138.9	2949.9	2792.7	4184.7	3334.9	3108.9	4212.6	3696.7	4221.5	5777.5	1953.2	4711.1	-0.743	0.096	1	0.1029	0.8344	0.9694	-0.4951	0.2032	0.9982
hsa-miR-17-5p	54	411	318	465	292	136	401	191	61	258	573	71	290	100	68	150	61	182	54.9	276	172	332.3	229.8	146.9	440	198.5	72.4	410.1	290.4	81.5	189.5	122	164.9	154.8	62.1	161.3	197.7	-0.8035	0.0983	1	-0.8246	0.1885	0.9694	-0.8227	0.0548	0.9982
hsa-miR-885-5p	131	1054	2723	627	964	200	151	320	332	0	525	263	110	228	148	122	434	377	133.3	707.7	1473	448.1	758.7	216	165.7	332.6	394	0	266	301.7	71.9	278.2	359	125.9	441.6	334.1	378.2	-1.0111	0.1031	1	0.1333	0.8971	0.9713	-0.6763	0.3419	0.9982
hsa-miR-181c-3p	30	0	0	9	0	0	0	1	0	0	0	0	0	0	0	0	0	0	30.5	0	0	6.4	0	0	0	1	0	0	0	0	0	0	0	0	0	0	0.4	-3.0283	0.1074	1	-0.332	0.8614	0.9694	-1.0435	0.5593	0.9982
hsa-miR-6837-3p	0	25	15	8	0	0	0	0	0	0	6	0	0	0	0	0	0	0	0	16.8	8.1	5.7	0	0	0	0	0	0	3	0	0	0	0	0	0	0	1.9	-2.9556	0.1106	1	-1.2721	0.5028	0.9694	-2.6446	0.1206	0.9982
hsa-miR-664a-3p	51	81	80	37	181	80	0	28	0	38	131	24	55	20	1	0	0	0	51.9	54.4	43.3	26.4	142.4	86.4	0	29.1	0	60.4	66.4	27.5	35.9	24.4	2.4	0	0	0	36.2	-1.9016	0.1107	1	-1.2859	0.3906	0.9694	-1.7864	0.0913	0.9982
hsa-miR-6819-3p	24	35	0	0	0	0	0	15	0	18	12	1	0	0	0	0	0	0	24.4	23.5	0	0	0	0	0	15.6	0	28.6	6.1	1.1	0	0	0	0	0	0	5.5	-2.9251	0.1177	1	-4.3449	0.0065	0.9694	-3.7772	0.0146	0.8804
hsa-miR-744-5p	137	78	0	23	0	0	0	0	0	52	35	0	8	11	1	0	0	0	139.4	52.4	0	16.4	0	0	0	0	0	82.7	17.7	0	5.2	13.4	2.4	0	0	0	18.3	-2.5005	0.1293	1	-2.2416	0.1845	0.9694	-2.4587	0.1018	0.9982
hsa-miR-362-3p	0	12	0	39	0	0	0	24	0	0	6	15	52	21	0	80	0	87	0	8.1	0	27.9	0	0	0	24.9	0	0	3	17.2	34	25.6	0	82.6	0	77.1	16.7	2.2621	0.1297	1	1.8405	0.2061	0.9694	2.116	0.119	0.9982
hsa-miR-4665-5p	0	0	0	0	0	0	0	0	0	0	2	7	19	0	0	0	0	0	0	0	0	0	0	0	0	0	0	0	1	8	12.4	0	0	0	0	0	1.2	2.8117	0.1356	1	1.8411	0.3276	0.9694	2.3189	0.1928	0.9982
hsa-miR-655-3p	0	8	26	4	0	278	0	0	0	0	0	0	22	0	0	0	0	0	0	5.4	14.1	2.9	0	300.2	0	0	0	0	0	0	14.4	0	0	0	0	0	1.3	-2.4354	0.1373	1	0	1		-1.9346	0.2637	0.9982
hsa-miR-1299	5	36	0	0	0	0	0	0	0	0	3	0	0	0	0	0	0	0	5.1	24.2	0	0	0	0	0	0	0	0	1.5	0	0	0	0	0	0	0	0.4	-2.7947	0.1374	1	-0.8241	0.6645	0.9694	-0.9433	0.5977	0.9982
hsa-miR-4732-5p	137	348	156	223	135	0	227	168	192	63	155	306	85	134	151	892	174	343	139.4	233.7	84.4	159.4	106.2	0	249.1	174.6	227.8	100.1	78.5	351	55.5	163.5	366.3	920.7	177	304	216.2	1.2085	0.1389	1	1.1473	0.1351	0.9694	1.1994	0.0688	0.9982
hsa-miR-582-3p	0	0	0	19	18	0	0	0	0	0	8	0	0	0	0	0	0	0	0	0	0	13.6	14.2	0	0	0	0	0	4.1	0	0	0	0	0	0	0	1.8	-2.7613	0.1422	1	-1.5071	0.4268	0.9694	-2.2536	0.2065	0.9982
hsa-miR-22-3p	4892	6059	15407	6659	7390	7600	7220	5148	2594	820	8837	6024	10648	5118	3571	15938	13243	6733	4977.1	4068.1	8334.6	4759.3	5816	8208.1	7921.5	5350.8	3078.1	1303.4	4478.1	6910.7	6957.5	6245.7	8662.1	16450.3	13475	5966.9	6831.3	0.5419	0.1426	1	1.3333	0.0294	0.9694	0.7931	0.034	0.9982
hsa-miR-548j-5p	0	0	8	0	36	0	0	33	0	82	45	0	0	47	0	136	2	122	0	0	4.3	0	28.3	0	0	34.3	0	130.3	22.8	0	0	57.4	0	140.4	2	108.1	29.3	2.4257	0.1456	1	-0.0475	0.9761	0.9977	0.8971	0.5467	0.9982
hsa-miR-584-3p	0	0	3	13	18	0	0	0	0	0	0	0	0	0	0	0	0	0	0	0	1.6	9.3	14.2	0	0	0	0	0	0	0	0	0	0	0	0	0	1.4	-2.7169	0.1462	1				-2.0529	0.25	0.9982
hsa-miR-4732-3p	212	422	446	292	560	208	758	266	76	0	343	389	394	174	582	598	626	788	215.7	283.3	241.3	208.7	440.7	224.6	831.7	276.5	90.2	0	173.8	446.3	257.4	212.3	1411.7	617.2	637	698.3	403.7	0.7715	0.1463	1	1.9928	0.0503	0.9694	1.1294	0.0901	0.9982
hsa-miR-496	0	0	0	0	0	0	0	0	0	0	0	0	14	8	0	0	0	0	0	0	0	0	0	0	0	0	0	0	0	0	9.1	9.8	0	0	0	0	1.1	2.717	0.1494	1	2.2776	0.229	0.9694	2.5287	0.1562	0.9982
hsa-miR-296-5p	0	0	30	13	0	0	0	0	0	0	8	0	0	0	0	0	0	0	0	0	16.2	9.3	0	0	0	0	0	0	4.1	0	0	0	0	0	0	0	1.6	-2.696	0.152	1	-1.5071	0.4268	0.9694	-2.1955	0.2185	0.9982
hsa-miR-7706	0	0	0	2	16	0	0	27	0	0	21	0	44	8	0	0	0	122	0	0	0	1.4	12.6	0	0	28.1	0	0	10.6	0	28.8	9.8	0	0	0	108.1	11.1	2.4579	0.1537	1	0.7804	0.6531	0.9694	1.6151	0.3002	0.9982
hsa-miR-125b-1-3p	54	1	0	0	26	1	0	13	0	6	0	0	0	0	0	322	0	0	54.9	0.7	0	0	20.5	1.1	0	13.5	0	9.5	0	0	0	0	0	332.4	0	0	2.7	-2.3903	0.1575	1	-2.9809	0.1029	0.9694	-2.7288	0.0657	0.9982
hsa-miR-5001-5p	0	0	0	0	0	0	0	0	0	0	0	13	0	0	1	0	0	0	0	0	0	0	0	0	0	0	0	0	0	14.9	0	0	2.4	0	0	0	1	2.6365	0.1619	1	2.2108	0.243	0.9694	2.4348	0.1722	0.9982
hsa-miR-206	157	193	70	21	233	85	44	136	0	0	102	42	21	44	10	1	0	131	159.7	129.6	37.9	15	183.4	91.8	48.3	141.4	0	0	51.7	48.2	13.7	53.7	24.3	1	0	116.1	62	-1.274	0.1622	1	-0.3312	0.8209	0.9694	-1.0021	0.3025	0.9982
hsa-miR-4638-5p	0	0	17	20	0	0	0	0	0	0	0	0	0	0	0	0	0	0	0	0	9.2	14.3	0	0	0	0	0	0	0	0	0	0	0	0	0	0	1.3	-2.6076	0.1659	1				-2.0006	0.2623	0.9982
hsa-miR-6812-3p	0	23	15	0	0	0	0	0	0	19	0	0	0	0	0	0	0	0	0	15.4	8.1	0	0	0	0	0	0	30.2	0	0	0	0	0	0	0	0	3	-2.6057	0.1662	1	-3.2964	0.0805	0.9694	-2.6726	0.134	0.9982
hsa-miR-3074-5p	0	11	0	3	1	0	0	0	0	0	4	11	0	0	0	84	0	0	0	7.4	0	2.1	0.8	0	0	0	0	0	2	12.6	0	0	0	86.7	0	0	6.2	2.3824	0.168	1	2.5139	0.1795	0.9694	2.7209	0.0853	0.9982
hsa-miR-7-1-3p	0	0	10	9	0	0	0	0	0	0	15	0	41	17	0	52	0	0	0	0	5.4	6.4	0	0	0	0	0	0	7.6	0	26.8	20.7	0	53.7	0	0	6.7	2.31	0.1694	1	1.8718	0.294	0.9694	2.2846	0.143	0.9982
hsa-miR-3198	0	0	26	11	0	0	289	0	0	15	0	0	0	0	0	0	0	0	0	0	14.1	7.9	0	0	317.1	0	0	23.8	0	0	0	0	0	0	0	0	2.5	-2.5545	0.1747	1	-3.0653	0.1042	0.9694	-2.544	0.1538	0.9982
hsa-miR-4687-5p	29	0	0	0	0	0	0	0	0	8	3	0	0	13	0	0	0	0	29.5	0	0	0	0	0	0	0	0	12.7	1.5	0	0	15.9	0	0	0	0	0.8	2.5258	0.1804	1	-0.3376	0.8573	0.9694	-1.5456	0.3868	0.9982
hsa-miR-181a-3p	0	25	0	7	0	0	0	0	0	51	19	0	44	0	0	0	0	0	0	16.8	0	5	0	0	0	0	0	81.1	9.6	0	28.8	0	0	0	0	0	1.8	-2.5165	0.1813	1	-1.5216	0.4162	0.9694	-2.2725	0.188	0.9982
hsa-miR-122-5p	32651	93856	410224	35706	145860	11577	134057	62917	70513	3565	72679	35139	2768	20939	32946	18325	57228	88984	33218.7	63016	221915	25519.5	114793	12503.3	147083	65395.4	83671.1	5666.5	36829.7	40311	1808.6	25552.9	79916	18914	58230.5	78859.4	61844.6	-1.0095	0.1822	1	-0.1263	0.8919	0.9713	-0.7354	0.2756	0.9982
hsa-miR-6787-3p	0	0	0	0	0	0	0	0	0	0	4	0	0	0	7	0	0	0	0	0	0	0	0	0	0	0	0	0	2	0	0	0	17	0	0	0	1.1	2.5128	0.1826	1	1.1756	0.5335	0.9694	1.8511	0.2991	0.9982
hsa-miR-1250-5p	0	0	0	0	0	0	0	0	0	0	3	13	0	0	0	0	0	0	0	0	0	0	0	0	0	0	0	0	1.5	14.9	0	0	0	0	0	0	0.1	2.5048	0.184	1	1.341	0.478	0.9694	-0.2484	0.8896	0.9982
hsa-miR-3614-5p	0	0	0	0	0	0	0	0	0	0	0	13	0	0	0	0	0	0	0	0	0	0	0	0	0	0	0	0	0	14.9	0	0	0	0	0	0	0	2.5048	0.184	1	2.0962	0.2684	0.9694	0	1
hsa-miR-6833-5p	0	0	0	0	0	0	0	0	0	0	0	13	0	0	0	0	0	0	0	0	0	0	0	0	0	0	0	0	0	14.9	0	0	0	0	0	0	0	2.5048	0.184	1	2.0962	0.2684	0.9694	0	1
hsa-miR-4727-3p	0	0	0	0	58	0	0	0	0	0	0	13	0	0	0	0	0	0	0	0	0	0	45.6	0	0	0	0	0	0	14.9	0	0	0	0	0	0	0	2.5048	0.184	1	2.0962	0.2684	0.9694	0	1
hsa-miR-3605-3p	39	84	55	52	62	103	0	37	69	39	54	41	25	8	0	25	0	0	39.7	56.4	29.8	37.2	48.8	111.2	0	38.5	81.9	62	27.4	47	16.3	9.8	0	25.8	0	0	35.1	-1.4979	0.1874	1	-1.6344	0.1969	0.9694	-1.6525	0.0635	0.9982
hsa-miR-340-5p	190	206	568	197	194	882	203	113	268	502	472	104	393	146	69	101	196	1	193.3	138.3	307.3	140.8	152.7	952.6	222.7	117.5	318	797.9	239.2	119.3	256.8	178.2	167.4	104.2	199.4	0.9	255.9	-0.9892	0.1891	1	-1.2012	0.2072	0.9694	-1.1126	0.0824	0.9982
hsa-miR-6891-5p	1	54	0	13	26	0	0	27	0	0	0	0	0	7	0	0	0	0	1	36.3	0	9.3	20.5	0	0	28.1	0	0	0	0	0	8.5	0	0	0	0	5.8	-2.1975	0.1926	1	-1.5731			-2.0228	0.2061	0.9982
hsa-miR-184	0	20	0	6	0	0	0	26	124	0	0	34	100	28	0	0	0	0	0	13.4	0	4.3	0	0	0	27	147.1	0	0	39	65.3	34.2	0	0	0	0	18.4	2.2214	0.1939	1	-0.7918	0.653	0.9694	0.1341	0.934	0.9982
hsa-miR-10a-3p	0	0	51	39	19	1	33	10	0	1	6	0	19	9	0	1	0	0	0	0	27.6	27.9	15	1.1	36.2	10.4	0	1.6	3	0	12.4	11	0	1	0	0	8.2	-1.8012	0.1943	1	-0.0803	0.9592	0.9947	-1.4377	0.2365	0.9982
hsa-miR-6729-3p	0	0	0	0	0	0	0	19	38	0	3	0	0	12	0	0	0	0	0	0	0	0	0	0	0	19.7	45.1	0	1.5	0	0	14.6	0	0	0	0	1.2	2.4478	0.1943	1	-2.0917	0.2378	0.9694	-1.9061	0.2856	0.9982
hsa-miR-216b-5p	0	0	20	0	0	0	0	0	0	0	0	0	0	12	0	0	0	0	0	0	10.8	0	0	0	0	0	0	0	0	0	0	14.6	0	0	0	0	0	2.4478	0.1943	1	2.0681	0.2749	0.9694	0	1
hsa-miR-335-5p	804	856	2116	834	476	651	247	572	604	211	1319	713	1854	662	259	1180	835	883	818	574.7	1144.7	596.1	374.6	703.1	271	594.5	716.7	335.4	668.4	817.9	1211.4	807.9	628.2	1217.9	849.6	782.5	728.5	0.4982	0.1944	1	0.6298	0.1814	0.9694	0.5421	0.0781	0.9982
hsa-miR-133a-3p	1	0	26	9	124	474	0	1	2	0	20	9	36	42	0	0	0	44	1	0	14.1	6.4	97.6	511.9	0	1	2.4	0	10.1	10.3	23.5	51.3	0	0	0	39	14.7	-1.9046	0.1952	1	1.909	0.1947	0.9694	0.4033	0.7419	0.9982
hsa-miR-1306-3p	0	14	56	0	0	0	0	20	0	33	16	25	0	57	0	0	0	327	0	9.4	30.3	0	0	0	0	20.8	0	52.5	8.1	28.7	0	69.6	0	0	0	289.8	28.3	2.2923	0.1962	1	1.103	0.5148	0.9694	1.7987	0.241	0.9982
hsa-miR-1260a	0	0	0	0	0	0	0	0	0	1	0	12	0	0	0	0	0	0	0	0	0	0	0	0	0	0	0	1.6	0	13.8	0	0	0	0	0	0	0.1	2.427	0.1981	1	1.4787	0.4346	0.9694	0.0412	0.9816	0.9982
hsa-miR-363-3p	722	1584	2559	3333	1775	1232	946	893	944	115	3089	1961	1578	1111	1537	2320	3389	475	734.6	1063.5	1384.3	2382.1	1396.9	1330.6	1037.9	928.2	1120.2	182.8	1565.3	2249.6	1031.1	1355.8	3728.2	2394.6	3448.4	421	1541.9	0.6343	0.2028	1	1.082	0.1655	0.9694	0.794	0.0912	0.9982
hsa-miR-195-5p	43	37	158	66	632	1819	2	30	1	19	137	67	49	29	0	151	528	5	43.7	24.8	85.5	47.2	497.4	1964.5	2.2	31.2	1.2	30.2	69.4	76.9	32	35.4	0	155.9	537.2	4.4	69.1	-1.4933	0.2031	1	1.6465	0.1923	0.9694	-0.6129	0.4929	0.9982
hsa-miR-548au-5p	12	0	3	7	0	0	0	12	0	0	4	0	0	0	0	0	0	0	12.2	0	1.6	5	0	0	0	12.5	0	0	2	0	0	0	0	0	0	0	1.9	-2.3941	0.2035	1	-2.6675	0.1578	0.9694	-2.8753	0.0729	0.9982
hsa-miR-6877-5p	0	10	0	17	0	0	0	0	0	0	0	0	0	0	0	0	0	0	0	6.7	0	12.2	0	0	0	0	0	0	0	0	0	0	0	0	0	0	1	-2.3834	0.2056	1				-1.8151	0.3092	0.9982
hsa-miR-193a-5p	488	1043	590	401	315	430	535	277	575	546	419	372	120	282	225	294	135	191	496.5	700.3	319.2	286.6	247.9	464.4	587	287.9	682.3	867.9	212.3	426.8	78.4	344.1	545.8	303.5	137.4	169.3	397.6	-0.6171	0.208	1	-0.7755	0.2795	0.9694	-0.7014	0.104	0.9982
hsa-miR-744-3p	0	0	0	0	0	0	0	0	0	0	0	0	16	2	0	0	0	0	0	0	0	0	0	0	0	0	0	0	0	0	10.5	2.4	0	0	0	0	0.7	2.3633	0.2103	1	1.9624	0.3004	0.9694	2.1847	0.2209	0.9982
hsa-miR-6823-5p	0	0	0	0	0	0	0	0	0	0	2	0	0	11	0	0	0	0	0	0	0	0	0	0	0	0	0	0	1	0	0	13.4	0	0	0	0	0.8	2.3632	0.2103	1	1.4538	0.4424	0.9694	1.8983	0.2873	0.9982
hsa-miR-5187-5p	0	0	0	0	0	0	0	0	0	0	10	0	0	11	0	0	0	0	0	0	0	0	0	0	0	0	0	0	5.1	0	0	13.4	0	0	0	0	1	2.3632	0.2103	1	0.3208	0.8647	0.9694	1.169	0.5118	0.9982
hsa-miR-4738-3p	0	16	0	0	0	0	0	0	0	0	0	0	0	23	0	0	0	125	0	10.7	0	0	0	0	0	0	0	0	0	0	0	28.1	0	0	0	110.8	8.3	2.3327	0.2111	1	3.4689	0.0651	0.9694	2.5918	0.1442	0.9982
hsa-miR-518f-3p	0	0	0	0	0	0	0	0	0	0	0	11	0	0	0	0	0	0	0	0	0	0	0	0	0	0	0	0	0	12.6	0	0	0	0	0	0	0.7	2.3424	0.2144	1	1.9572	0.3017	0.9694	2.1493	0.2285	0.9982
hsa-miR-6715a-3p	0	0	0	0	0	0	0	0	0	0	0	11	0	0	0	0	0	0	0	0	0	0	0	0	0	0	0	0	0	12.6	0	0	0	0	0	0	0.7	2.3424	0.2144	1	1.9572	0.3017	0.9694	2.1493	0.2285	0.9982
hsa-miR-224-5p	20	246	624	79	78	0	189	122	245	1855	154	33	2389	106	68	0	50	665	20.3	165.2	337.6	56.5	61.4	0	207.4	126.8	290.7	2948.5	78	37.9	1561	129.4	164.9	0	50.9	589.3	379.2	1.4299	0.2157	1	-1.0322	0.4334	0.9694	-0.097	0.9284	0.9982
hsa-miR-624-5p	0	0	76	93	27	0	0	0	0	0	24	11	0	0	0	0	0	0	0	0	41.1	66.5	21.2	0	0	0	0	0	12.2	12.6	0	0	0	0	0	0	8.5	-2.2273	0.2169	1	-0.4822			-1.847	0.2747	0.9982
hsa-miR-3177-3p	92	16	0	30	0	0	0	0	0	27	16	0	14	6	0	0	0	0	93.6	10.7	0	21.4	0	0	0	0	0	42.9	8.1	0	9.1	7.3	0	0	0	0	10.7	-2.1113	0.2186	1	-1.6686	0.3455	0.9694	-2.0598	0.1816	0.9982
hsa-miR-215-5p	53	0	197	226	30	0	196	52	93	0	112	12	50	62	0	0	0	0	53.9	0	106.6	161.5	23.6	0	215	54	110.4	0	56.8	13.8	32.7	75.7	0	0	0	0	50.2	-1.8109	0.2198	1	-1.2846	0.4279	0.9694	-1.7219	0.1777	0.9982
hsa-miR-7704	0	1	8	0	15	0	0	0	0	0	1	0	0	0	0	0	0	0	0	0.7	4.3	0	11.8	0	0	0	0	0	0.5	0	0	0	0	0	0	0	1	-2.3088	0.2202	1	-0.3184	0.867	0.9694	-1.9291	0.2663	0.9982
hsa-miR-548k	57	33	9	13	0	0	0	0	1	34	3	7	13	0	0	0	0	0	58	22.2	4.9	9.3	0	0	0	0	1.2	54	1.5	8	8.5	0	0	0	0	0	9.3	-1.9301	0.2203	1	-1.8447	0.2761	0.9694	-2.0527	0.1359	0.9982
hsa-miR-6894-3p	0	3	11	12	0	0	0	0	0	0	18	0	0	0	0	0	191	0	0	2	6	8.6	0	0	0	0	0	0	9.1	0	0	0	0	0	194.3	0	1.4	-2.2787	0.2263	1	-2.2644	0.231	0.9694	-2.3848	0.1619	0.9982
hsa-miR-1538	0	0	13	13	0	0	0	0	0	21	1	0	0	0	0	0	0	0	0	0	7	9.3	0	0	0	0	0	33.4	0.5	0	0	0	0	0	0	0	2.8	-2.2701	0.2281	1	-3.4107			-2.9282	0.0898	0.9982
hsa-miR-181a-5p	1655	2987	3918	1426	1763	1548	988	3010	1666	882	2732	2838	3180	1287	661	1854	2421	1603	1683.8	2005.5	2119.5	1019.2	1387.5	1671.9	1084	3128.6	1976.9	1401.9	1384.4	3255.7	2077.8	1570.6	1603.4	1913.6	2463.4	1420.6	1842.7	0.3904	0.229	1	0.0645	0.9013	0.9713	0.2516	0.371	0.9982
hsa-miR-2110	252	362	45	212	62	176	117	216	246	202	198	181	380	131	66	293	148	434	256.4	243.1	24.3	151.5	48.8	190.1	128.4	224.5	291.9	321.1	100.3	207.6	248.3	159.9	160.1	302.4	150.6	384.6	199.7	0.6403	0.2307	1	0.0017	0.9976	1	0.3539	0.4416	0.9982
hsa-miR-6756-3p	0	0	1	0	0	0	0	0	0	0	1	13	0	0	0	0	0	0	0	0	0.5	0	0	0	0	0	0	0	0.5	14.9	0	0	0	0	0	0	0.1	2.2485	0.2329	1	1.7944	0.3432	0.9694	-0.1092	0.9513	0.9982
hsa-miR-188-5p	0	0	0	0	0	0	0	0	0	0	0	10	0	0	0	0	0	0	0	0	0	0	0	0	0	0	0	0	0	11.5	0	0	0	0	0	0	0.6	2.2504	0.233	1	1.8779	0.3218	0.9694	2.0648	0.2473	0.9982
hsa-miR-212-5p	0	0	0	0	0	0	0	0	0	0	0	10	0	0	0	0	0	0	0	0	0	0	0	0	0	0	0	0	0	11.5	0	0	0	0	0	0	0.6	2.2504	0.233	1	1.8779	0.3218	0.9694	2.0648	0.2473	0.9982
hsa-miR-1246	0	0	2	18	14	0	322	0	0	1	4	1	0	0	0	0	1	4	0	0	1.1	12.9	11	0	353.3	0	0	1.6	2	1.1	0	0	0	0	1	3.5	1.9	-1.7437	0.2331	1	-0.0472	0.9781	0.9977	-1.3145	0.3425	0.9982
hsa-miR-107	121	560	704	611	327	333	656	442	133	57	732	803	612	354	183	832	513	325	123.1	376	380.8	436.7	257.4	359.6	719.7	459.4	157.8	90.6	370.9	921.2	399.9	432	443.9	858.7	522	288	422.1	0.5412	0.234	1	0.9931	0.1329	0.9694	0.6927	0.0991	0.9982
hsa-miR-185-3p	54	96	30	22	0	0	0	55	0	0	33	0	38	1	0	0	0	0	54.9	64.5	16.2	15.7	0	0	0	57.2	0	0	16.7	0	24.8	1.2	0	0	0	0	14	-1.911	0.2392	1	-1.6061	0.373	0.9694	-1.9097	0.1935	0.9982
hsa-miR-3200-3p	0	6	0	16	0	0	0	53	0	0	21	40	0	0	0	0	0	0	0	4	0	11.4	0	0	0	55.1	0	0	10.6	45.9	0	0	0	0	0	0	4.6	-2.1971	0.2435	1	-0.8172	0.6623	0.9694	-3.2617	0.048	0.9982
hsa-miR-454-3p	168	131	236	234	377	139	38	48	21	446	323	58	218	114	12	0	78	102	170.9	88	127.7	167.2	296.7	150.1	41.7	49.9	24.9	708.9	163.7	66.5	142.4	139.1	29.1	0	79.4	90.4	140.9	-0.8794	0.2452	1	-1.3911	0.2128	0.9694	-1.1573	0.1084	0.9982
hsa-miR-6865-3p	0	15	9	0	0	0	0	0	0	0	0	0	0	0	0	0	0	0	0	10.1	4.9	0	0	0	0	0	0	0	0	0	0	0	0	0	0	0	0.8	-2.1788	0.2474	1				-1.6233	0.3633	0.9982
hsa-miR-374b-3p	0	47	20	59	0	0	0	29	0	3	79	0	10	6	1	0	0	0	0	31.6	10.8	42.2	0	0	0	30.1	0	4.8	40	0	6.5	7.3	2.4	0	0	0	9.8	-1.8374	0.2491	1	-2.4751	0.1019	0.9694	-2.1827	0.1057	0.9982
hsa-miR-4676-5p	0	0	0	0	0	0	0	0	0	0	0	0	0	9	0	109	0	0	0	0	0	0	0	0	0	0	0	0	0	0	0	11	0	112.5	0	0	6.9	2.1742	0.2493	1	1.8279	0.3349	0.9694	4.7085	0.0082	0.8424
hsa-miR-6515-3p	0	0	0	0	0	0	0	0	0	0	0	0	0	9	0	0	0	0	0	0	0	0	0	0	0	0	0	0	0	0	0	11	0	0	0	0	0.6	2.1742	0.2493	1	1.8279	0.3349	0.9694	2.023	0.2571	0.9982
hsa-miR-6885-3p	0	28	0	0	0	0	0	0	0	0	4	0	0	9	0	0	0	0	0	18.8	0	0	0	0	0	0	0	0	2	0	0	11	0	0	0	0	0.7	2.1742	0.2493	1	0.8834	0.6403	0.9694	1.4908	0.4034	0.9982
hsa-miR-1307-5p	0	9	0	0	0	0	0	0	0	0	0	6	0	0	0	56	0	0	0	6	0	0	0	0	0	0	0	0	0	6.9	0	0	0	57.8	0	0	3.9	2.1521	0.2494	1	3.1865	0.0915	0.9694	2.4136	0.1744	0.9982
hsa-miR-5189-3p	0	35	0	1	0	0	0	0	0	0	0	0	0	12	0	0	0	0	0	23.5	0	0.7	0	0	0	0	0	0	0	0	0	14.6	0	0	0	0	0	2.1557	0.2529	1	2.0681	0.2749	0.9694	0.0412	0.9816	0.9982
hsa-miR-4772-5p	0	0	0	0	0	0	0	0	0	0	0	9	0	0	0	0	0	0	0	0	0	0	0	0	0	0	0	0	0	10.3	0	0	0	0	0	0	0.6	2.1551	0.2536	1	1.7917	0.3447	0.9694	1.9719	0.2694	0.9982
hsa-miR-548d-3p	0	0	0	0	0	0	0	0	0	0	0	9	0	0	0	0	0	0	0	0	0	0	0	0	0	0	0	0	0	10.3	0	0	0	0	0	0	0.6	2.1551	0.2536	1	1.7917	0.3447	0.9694	1.9719	0.2694	0.9982
hsa-miR-6818-5p	0	0	0	0	0	0	0	0	0	0	0	9	0	0	0	0	0	0	0	0	0	0	0	0	0	0	0	0	0	10.3	0	0	0	0	0	0	0.6	2.1551	0.2536	1	1.7917	0.3447	0.9694	1.9719	0.2694	0.9982
hsa-miR-652-5p	0	0	0	0	0	0	0	0	0	0	5	9	0	0	0	0	0	0	0	0	0	0	0	0	0	0	0	0	2.5	10.3	0	0	0	0	0	0	0.7	2.1551	0.2536	1	0.6728	0.7217	0.9694	1.3396	0.4527	0.9982
hsa-miR-2116-3p	0	0	20	0	0	0	0	24	0	0	6	9	0	0	0	0	0	0	0	0	10.8	0	0	0	0	24.9	0	0	3	10.3	0	0	0	0	0	0	1.3	2.1551	0.2536	1	-1.4035	0.453	0.9694	0.1217	0.9455	0.9982
hsa-miR-550a-3p	0	15	8	0	0	0	0	0	0	0	10	0	0	0	0	0	0	0	0	10.1	4.3	0	0	0	0	0	0	0	5.1	0	0	0	0	0	0	0	1.1	-2.1423	0.2555	1	-1.7123	0.3661	0.9694	-1.8448	0.3014	0.9982
hsa-miR-1287-5p	0	44	0	0	0	0	0	0	0	0	0	25	0	0	0	153	0	87	0	29.5	0	0	0	0	0	0	0	0	0	28.7	0	0	0	157.9	0	77.1	16.3	2.0806	0.2589	1	4	0.0304	0.9694	2.3486	0.1829	0.9982
hsa-miR-1290	0	5	2	7	0	4	0	0	0	0	2	2	0	0	0	0	0	0	0	3.4	1.1	5	0	4.3	0	0	0	0	1	2.3	0	0	0	0	0	0	0.9	-1.8358	0.2603	1	-0.0716	0.9699	0.9977	-1.4575	0.3302	0.9982
hsa-miR-548c-5p	12	0	3	9	0	0	0	12	0	0	7	0	3	0	0	0	0	0	12.2	0	1.6	6.4	0	0	0	12.5	0	0	3.5	0	2	0	0	0	0	0	2.1	-2.0111	0.2622	1	-2.2471	0.2256	0.9694	-2.3523	0.1246	0.9982
hsa-miR-548o-5p	12	0	3	9	0	0	0	12	0	0	7	0	3	0	0	0	0	0	12.2	0	1.6	6.4	0	0	0	12.5	0	0	3.5	0	2	0	0	0	0	0	2.1	-2.0111	0.2622	1	-2.2471	0.2256	0.9694	-2.3523	0.1246	0.9982
hsa-miR-548am-5p	12	0	3	9	0	0	0	12	0	0	6	0	3	0	0	0	0	0	12.2	0	1.6	6.4	0	0	0	12.5	0	0	3	0	2	0	0	0	0	0	2.1	-2.0111	0.2622	1	-2.207	0.2347	0.9694	-2.3352	0.1277	0.9982
hsa-miR-10399-3p	34	37	6	0	0	0	0	26	0	56	18	0	12	0	0	0	0	0	34.6	24.8	3.2	0	0	0	0	27	0	89	9.1	0	7.8	0	0	0	0	0	10.9	-2.002	0.2636	1	-3.5023	0.0393	0.9694	-2.9282	0.0521	0.9982
hsa-miR-3605-5p	0	13	0	7	0	0	0	0	0	0	31	0	0	0	27	0	0	0	0	8.7	0	5	0	0	0	0	0	0	15.7	0	0	0	65.5	0	0	0	0.8	-2.0824	0.2691	1	-2.7801			-1.5506	0.3853	0.9982
hsa-miR-29b-3p	137	202	924	432	492	319	1	163	81	7	508	304	101	75	0	41	179	119	139.4	135.6	499.8	308.8	387.2	344.5	1.1	169.4	96.1	11.1	257.4	348.7	66	91.5	0	42.3	182.1	105.5	177	-1.0288	0.2712	1	-0.1398	0.898	0.9713	-0.7936	0.3293	0.9982
hsa-miR-3661	0	0	0	0	0	0	0	0	0	0	0	0	0	8	0	0	0	0	0	0	0	0	0	0	0	0	0	0	0	0	0	9.8	0	0	0	0	0.5	2.0679	0.2734	1	1.7355	0.3601	0.9694	1.919	0.2825	0.9982
hsa-miR-196b-5p	143	137	260	106	284	0	2	159	138	80	164	34	159	25	180	272	375	223	145.5	92	140.6	75.8	223.5	0	2.2	165.3	163.8	127.2	83.1	39	103.9	30.5	436.6	280.7	381.6	197.6	149.4	1.0235	0.2739	1	0.6188	0.4453	0.9694	0.8785	0.2485	0.9982
hsa-miR-30c-5p	1274	1250	1409	1295	1010	1109	268	462	716	2390	2437	436	1536	679	209	599	232	739	1296.2	839.3	762.2	925.6	794.9	1197.7	294	480.2	849.6	3798.9	1234.9	500.2	1003.6	828.6	507	618.3	236.1	654.9	934.6	-0.4668	0.2756	1	-1.2735	0.0672	0.9694	-0.8531	0.0642	0.9982
hsa-miR-423-5p	22656	34455	18576	22243	19737	21494	23458	15513	22676	22912	19545	18976	32136	12119	12230	41686	23955	25540	23049.9	23133.5	10048.9	15897.3	15533.2	23213.7	25737.3	16124.1	26907.5	36418.2	9904.3	21769	20998	14789.4	29665.9	43026	24374.6	22634	22401.4	0.3763	0.2757	1	0.2019	0.7155	0.9694	0.2994	0.3524	0.9982
hsa-miR-937-3p	0	0	0	0	0	0	0	0	0	0	4	8	0	0	0	0	0	0	0	0	0	0	0	0	0	0	0	0	2	9.2	0	0	0	0	0	0	0.6	2.049	0.2778	1	0.7386	0.6962	0.9694	1.3372	0.4537	0.9982
hsa-miR-429	0	0	9	24	0	0	0	17	0	8	9	13	0	12	45	0	0	0	0	0	4.9	17.2	0	0	0	17.7	0	12.7	4.6	14.9	0	14.6	109.2	0	0	0	10.9	1.8889	0.2782	1	0.89	0.5898	0.9694	1.5252	0.3022	0.9982
hsa-miR-30c-2-3p	10	0	0	4	0	0	0	0	0	0	1	0	0	0	0	0	0	0	10.2	0	0	2.9	0	0	0	0	0	0	0.5	0	0	0	0	0	0	0	0.8	-2.0396	0.2791	1	-0.3184	0.867	0.9694	-1.5275	0.3924	0.9982
hsa-miR-589-5p	48	119	23	25	0	77	0	13	95	10	27	0	19	18	0	0	0	38	48.8	79.9	12.4	17.9	0	83.2	0	13.5	112.7	15.9	13.7	0	12.4	22	0	0	0	33.7	25.9	-1.5108	0.2815	1	-1.6459	0.2539	0.9694	-1.6737	0.1399	0.9982
hsa-miR-550a-5p	28	14	75	48	40	0	54	0	189	9	95	21	26	0	0	0	331	24	28.5	9.4	40.6	34.3	31.5	0	59.2	0	224.3	14.3	48.1	24.1	17	0	0	0	336.8	21.3	31.9	-1.1587	0.2884	1	-2.1668	0.1414	0.9694	-1.6937	0.1068	0.9982
hsa-miR-10401-3p	140	162	6	35	37	0	0	24	0	65	61	0	16	50	0	0	0	0	142.4	108.8	3.2	25	29.1	0	0	24.9	0	103.3	30.9	0	10.5	61	0	0	0	0	30	-1.6586	0.2908	1	-1.3886	0.4208	0.9694	-1.7002	0.2093	0.9982
hsa-miR-132-5p	84	0	0	0	0	0	0	0	0	3	5	0	0	10	64	0	0	0	85.5	0	0	0	0	0	0	0	0	4.8	2.5	0	0	12.2	155.2	0	0	0	1.1	1.985	0.2927	1	-0.0009	0.9996	1	0.8552	0.6312	0.9982
hsa-miR-4500	0	0	0	0	0	0	0	0	0	0	0	0	0	7	0	0	0	0	0	0	0	0	0	0	0	0	0	0	0	0	0	8.5	0	0	0	0	0.5	1.9478	0.3024	1	1.6325	0.3894	0.9694	1.8019	0.313	0.9982
hsa-miR-5583-3p	0	0	0	0	0	0	0	0	0	0	0	0	0	7	0	0	0	0	0	0	0	0	0	0	0	0	0	0	0	0	0	8.5	0	0	0	0	0.5	1.9478	0.3024	1	1.6325	0.3894	0.9694	1.8019	0.313	0.9982
hsa-miR-191-3p	15	141	48	10	63	0	0	0	18	27	82	0	37	16	0	195	271	33	15.3	94.7	26	7.1	49.6	0	0	0	21.4	42.9	41.6	0	24.2	19.5	0	201.3	275.7	29.2	47.1	1.3198	0.3031	1	1.3251	0.3533	0.9694	1.3688	0.2239	0.9982
hsa-miR-518c-3p	0	0	0	0	0	0	0	0	0	0	0	7	0	0	0	0	0	0	0	0	0	0	0	0	0	0	0	0	0	8	0	0	0	0	0	0	0.4	1.9292	0.3071	1	1.5984	0.3995	0.9694	1.7521	0.3266	0.9982
hsa-miR-3913-5p	0	0	0	20	0	0	0	0	0	0	1	7	0	0	0	0	0	0	0	0	0	14.3	0	0	0	0	0	0	0.5	8	0	0	0	0	0	0	0.5	1.9292	0.3071	1	1.2514	0.5092	0.9694	1.5892	0.3736	0.9982
hsa-miR-1908-3p	0	0	0	0	0	0	0	0	0	0	0	0	12	0	0	0	0	0	0	0	0	0	0	0	0	0	0	0	0	0	7.8	0	0	0	0	0	0	1.9271	0.3076	1	1.5805	0.4048	0.9694	0	1
hsa-miR-3180-5p	0	0	0	0	0	0	0	0	0	0	0	0	12	0	0	0	0	0	0	0	0	0	0	0	0	0	0	0	0	0	7.8	0	0	0	0	0	0	1.9271	0.3076	1	1.5805	0.4048	0.9694	0	1
hsa-miR-652-3p	2075	3020	3135	2830	1490	496	1689	1647	1433	1154	4461	1396	4043	2038	355	1271	3502	3605	2111.1	2027.7	1695.9	2022.6	1172.6	535.7	1853.1	1711.9	1700.4	1834.3	2260.6	1601.5	2641.7	2487.1	861.1	1311.9	3563.3	3194.8	1921.5	0.4537	0.3109	1	0.2664	0.6424	0.9694	0.3757	0.278	0.9982
hsa-miR-2355-3p	0	11	0	0	0	0	0	53	0	0	16	0	34	29	0	0	0	0	0	7.4	0	0	0	0	0	55.1	0	0	8.1	0	22.2	35.4	0	0	0	0	7.1	1.8871	0.3124	1	-0.6383	0.7252	0.9694	0.2393	0.8889	0.9982
hsa-miR-29a-3p	1001	1301	3881	2488	2263	3259	462	1835	667	191	2435	1529	1283	819	511	1095	1663	567	1018.4	873.5	2099.5	1778.2	1781	3519.7	506.9	1907.3	791.5	303.6	1233.9	1754	838.3	999.5	1239.5	1130.2	1692.1	502.5	1331.6	-0.4883	0.313	1	0.134	0.8398	0.9694	-0.2985	0.5094	0.9982
hsa-miR-451a	93301	183813	378300	549652	158638	123909	171297	172732	118272	7076	417732	515179	296143	144039	95803	207563	241457	118996	94923.3	123414	204645	392843	124849	133823	187941	179536	140342	11247.2	211684	591006	193502	175778	232386	214235	245687	105457	197961	0.487	0.316	1	0.8456	0.289	0.9694	0.6021	0.2252	0.9982
hsa-miR-152-3p	150	131	172	79	355	354	0	104	48	99	140	98	25	93	0	55	1	178	152.6	88	93	56.5	279.4	382.3	0	108.1	57	157.4	70.9	112.4	16.3	113.5	0	56.8	1	157.7	105.7	-1.0718	0.3177	1	-0.4994	0.657	0.9694	-0.9417	0.2804	0.9982
hsa-miR-15b-5p	2309	6552	9068	12595	4652	3433	3390	4712	3862	979	12201	7430	6857	4051	2746	7997	6686	2676	2349.1	4399.1	4905.4	9001.8	3661.2	3707.7	3719.4	4897.6	4582.7	1556.1	6182.8	8523.6	4480.4	4943.6	6660.9	8254.1	6803.1	2371.5	5055.6	0.4099	0.3184	1	0.4632	0.4486	0.9694	0.4276	0.2368	0.9982
hsa-miR-30c-1-3p	0	15	0	0	43	0	0	34	0	0	2	0	0	0	0	110	0	0	0	10.1	0	0	33.8	0	0	35.3	0	0	1	0	0	0	0	113.5	0	0	4.5	-1.8602	0.3238	1	-3.5504			-3.3704	0.0506	0.9982
hsa-miR-1293	0	0	0	0	0	0	0	0	0	0	0	0	11	0	0	0	0	0	0	0	0	0	0	0	0	0	0	0	0	0	7.2	0	0	0	0	0	0.4	1.8517	0.3271	1	1.5164	0.4243	0.9694	1.6865	0.3451	0.9982
hsa-miR-579-3p	0	0	0	0	0	0	0	0	0	0	3	0	11	0	0	0	0	0	0	0	0	0	0	0	0	0	0	0	1.5	0	7.2	0	0	0	0	0	0.5	1.8517	0.3271	1	0.7234	0.7026	0.9694	1.2613	0.48	0.9982
hsa-miR-939-5p	0	101	0	16	0	0	0	0	0	27	16	0	9	15	102	1	63	0	0	67.8	0	11.4	0	0	0	0	0	42.9	8.1	0	5.9	18.3	247.4	1	64.1	0	25.9	1.6011	0.3274	1	1.5081	0.3504	0.9694	1.5926	0.284	0.9982
hsa-miR-192-5p	497	645	3701	1469	760	803	650	386	628	0	1374	748	688	540	56	473	1147	615	505.6	433.1	2002.1	1049.9	598.1	867.2	713.2	401.2	745.2	0	696.3	858.1	449.5	659	135.8	488.2	1167.1	545	684.1	-0.509	0.3299	1	0.3853	0.7185	0.9694	-0.2357	0.7288	0.9982
hsa-miR-941	30	44	66	41	0	79	0	47	0	0	90	36	121	9	28	0	359	0	30.5	29.5	35.7	29.3	0	85.3	0	48.9	0	0	45.6	41.3	79.1	11	67.9	0	365.3	0	48.3	1.242	0.3338	1	1.3853	0.3795	0.9694	1.3435	0.2681	0.9982
hsa-miR-3143	0	12	27	11	46	0	0	0	0	0	6	0	22	0	0	0	0	0	0	8.1	14.6	7.9	36.2	0	0	0	0	0	3	0	14.4	0	0	0	0	0	4.7	-1.6202	0.3344	1	-1.2721	0.5028	0.9694	-1.1727	0.4595	0.9982
hsa-miR-101-3p	2378	3152	6180	5639	3729	3565	2211	2698	2042	1358	5322	3676	8031	1978	1409	4903	3380	2534	2419.3	2116.3	3343.1	4030.3	2934.7	3850.2	2425.8	2804.3	2423	2158.5	2696.9	4217.1	5247.5	2413.9	3417.8	5060.6	3439.2	2245.7	3180.2	0.31	0.3373	1	0.5567	0.2318	0.9694	0.3894	0.1127	0.9982
hsa-miR-3620-3p	0	16	0	6	0	0	0	0	5	0	7	0	29	0	0	67	0	0	0	10.7	0	4.3	0	0	0	0	5.9	0	3.5	0	18.9	0	0	69.2	0	0	6.3	1.7423	0.3376	1	1.5327	0.3957	0.9694	1.8515	0.2452	0.9982
hsa-miR-223-3p	4890	10471	16713	10442	4385	1622	2431	5335	1074	3243	19101	1433	9042	6208	429	2923	1778	4145	4975	7030.4	9041.1	7463	3451	1751.8	2667.2	5545.2	1274.4	5154.7	9679.3	1643.9	5908.1	7575.9	1040.6	3017	1809.1	3673.4	4594.5	-0.5361	0.338	1	-0.5948	0.4392	0.9694	-0.5711	0.2447	0.9982
hsa-miR-202-3p	0	0	0	0	25	0	0	0	0	0	6	0	0	6	0	0	0	0	0	0	0	0	19.7	0	0	0	0	0	3	0	0	7.3	0	0	0	0	0.6	1.81	0.3382	1	0.2294	0.9034	0.9713	0.9508	0.5943	0.9982
hsa-miR-589-3p	0	19	0	0	0	0	0	0	0	0	6	0	0	6	0	0	0	0	0	12.8	0	0	0	0	0	0	0	0	3	0	0	7.3	0	0	0	0	0.6	1.81	0.3382	1	0.2294	0.9034	0.9713	0.9508	0.5943	0.9982
hsa-miR-4659b-3p	0	0	0	0	0	0	0	0	0	16	11	0	0	6	0	0	0	0	0	0	0	0	0	0	0	0	0	25.4	5.6	0	0	7.3	0	0	0	0	0.7	1.81	0.3382	1	-1.8109	0.3294	0.9694	0.5866	0.7423	0.9982
hsa-miR-6806-3p	0	0	0	0	0	0	0	0	0	5	0	0	0	6	0	0	0	0	0	0	0	0	0	0	0	0	0	7.9	0	0	0	7.3	0	0	0	0	0.8	1.81	0.3382	1	-0.4796	0.799	0.9694	0.5185	0.7713	0.9982
hsa-miR-3158-3p	0	19	59	22	38	68	331	9	24	0	63	0	0	0	0	109	0	51	0	12.8	31.9	15.7	29.9	73.4	363.2	9.4	28.5	0	31.9	0	0	0	0	112.5	0	45.2	41.9	-1.4307	0.3447	1	0.2196	0.9001	0.9713	-1.0593	0.4245	0.9982
hsa-miR-11400	0	0	29	0	21	0	0	1	0	26	29	0	147	40	0	0	0	14	0	0	15.7	0	16.5	0	0	1	0	41.3	14.7	0	96.1	48.8	0	0	0	12.4	13.7	1.6442	0.3447	1	0.5274	0.7509	0.9694	1.1531	0.4429	0.9982
hsa-miR-6788-3p	0	0	8	0	0	5	0	0	0	0	0	0	0	0	0	0	0	0	0	0	4.3	0	0	5.4	0	0	0	0	0	0	0	0	0	0	0	0	0.5	-1.7674	0.3486	1				-1.252	0.4835	0.9982
hsa-miR-3065-5p	0	0	0	0	0	0	0	0	0	0	8	0	10	0	0	0	0	0	0	0	0	0	0	0	0	0	0	0	4.1	0	6.5	0	0	0	0	0	0.6	1.7696	0.3491	1	-0.0927	0.9608	0.9949	0.7326	0.6815	0.9982
hsa-miR-4742-3p	71	58	12	44	39	1	79	12	0	0	8	34	0	46	0	0	0	0	72.2	38.9	6.5	31.4	30.7	1.1	86.7	12.5	0	0	4.1	39	0	56.1	0	0	0	0	21.1	-1.2654	0.3503	1	1.1241	0.5366	0.9694	-0.7878	0.5395	0.9982
hsa-miR-1285-3p	0	2	25	77	158	30	0	0	0	14	43	68	52	61	0	100	303	0	0	1.3	13.5	55	124.3	32.4	0	0	0	22.3	21.8	78	34	74.4	0	103.2	308.3	0	48.3	1.2098	0.3537	1	2.3966	0.1127	0.9694	1.5594	0.2042	0.9982
hsa-miR-31-5p	0	14	14	2	0	0	0	0	0	3	11	0	0	1	2	0	0	0	0	9.4	7.6	1.4	0	0	0	0	0	4.8	5.6	0	0	1.2	4.9	0	0	0	1.9	-1.5511	0.3563	1	-1.4405	0.4179	0.9694	-1.6736	0.2459	0.9982
hsa-let-7i-5p	26137	24934	37551	33634	52392	31082	38668	23388	26535	15901	37719	26792	36630	17304	17606	50750	51246	42011	26591.5	16741	20313.6	24038.6	41232.9	33568.8	42425.2	24309.3	31486.6	25274.4	19113.9	30735.4	23934.4	21116.9	42706.3	52381.3	52143.7	37231	31408	0.3354	0.3582	1	0.5754	0.2397	0.9694	0.4201	0.1406	0.9982
hsa-miR-4433a-5p	0	0	0	14	0	0	0	0	0	0	19	0	44	28	0	0	0	0	0	0	0	10	0	0	0	0	0	0	9.6	0	28.8	34.2	0	0	0	0	4.6	1.7017	0.362	1	1.1002	0.5571	0.9694	1.4837	0.3954	0.9982
hsa-miR-676-3p	0	0	0	13	0	0	0	0	0	0	20	0	0	0	0	0	0	0	0	0	0	9.3	0	0	0	0	0	0	10.1	0	0	0	0	0	0	0	1.1	-1.7127	0.3638	1	-2.3649			-1.8429	0.3019	0.9982
hsa-miR-6873-3p	0	0	0	13	0	0	0	0	0	0	9	0	0	0	0	0	0	0	0	0	0	9.3	0	0	0	0	0	0	4.6	0	0	0	0	0	0	0	0.8	-1.7127	0.3638	1	-1.6151	0.3942	0.9694	-1.5597	0.3825	0.9982
hsa-miR-548at-3p	0	0	0	13	0	0	0	0	0	0	2	0	0	0	0	0	0	0	0	0	0	9.3	0	0	0	0	0	0	1	0	0	0	0	0	0	0	0.1	-1.7127	0.3638	1	-0.6115	0.7477	0.9694	-0.1092	0.9513	0.9982
hsa-miR-6804-3p	0	0	0	13	0	0	0	0	0	0	0	0	0	0	0	0	0	0	0	0	0	9.3	0	0	0	0	0	0	0	0	0	0	0	0	0	0	0	-1.7127	0.3638	1				0	1
hsa-miR-6511a-3p	110	208	63	45	147	62	0	125	13	0	54	50	132	71	71	147	110	141	111.9	139.7	34.1	32.2	115.7	67	0	129.9	15.4	0	27.4	57.4	86.3	86.6	172.2	151.7	111.9	125	81.3	0.6416	0.3725	1	1.2749	0.1865	0.9694	0.8423	0.2655	0.9982
hsa-miR-205-5p	1	90	27	16	0	0	0	17	0	0	9	5	26	0	0	0	0	0	1	60.4	14.6	11.4	0	0	0	17.7	0	0	4.6	5.7	17	0	0	0	0	0	7.4	-1.4451	0.3725	1	-0.5449	0.7599	0.9694	-1.2714	0.3805	0.9982
hsa-miR-3120-3p	19	37	0	11	0	0	0	81	0	0	2	0	15	0	0	0	0	0	19.3	24.8	0	7.9	0	0	0	84.2	0	0	1	0	9.8	0	0	0	0	0	8.2	-1.5956	0.374	1	-2.5149			-2.1947	0.1742	0.9982
hsa-miR-4503	0	0	0	0	0	0	0	0	0	0	0	0	9	0	0	0	0	0	0	0	0	0	0	0	0	0	0	0	0	0	5.9	0	0	0	0	0	0.3	1.6794	0.3744	1	1.3697	0.4707	0.9694	1.5187	0.3955	0.9982
hsa-miR-16-2-3p	1973	1899	3027	4766	2629	1792	2145	1538	3366	490	3878	2819	4511	1432	882	3788	2330	1857	2007.3	1275	1637.5	3406.3	2069	1935.4	2353.4	1598.6	3994.1	778.8	1965.2	3233.9	2947.5	1747.5	2139.4	3909.8	2370.8	1645.7	2278.6	0.3001	0.381	1	0.2956	0.6228	0.9694	0.2942	0.3793	0.9982
hsa-miR-548ar-3p	0	13	0	0	0	0	0	30	0	0	0	0	0	0	0	0	0	0	0	8.7	0	0	0	0	0	31.2	0	0	0	0	0	0	0	0	0	0	0.5	-1.6516	0.3813	1	-3.4005			-1.1739	0.5112	0.9982
hsa-miR-6796-3p	0	13	0	0	0	0	0	0	0	0	0	0	0	0	0	0	0	0	0	8.7	0	0	0	0	0	0	0	0	0	0	0	0	0	0	0	0	0	-1.6516	0.3813	1				0	1
hsa-miR-4779	0	0	27	0	0	0	0	0	0	0	0	0	0	8	34	0	0	0	0	0	14.6	0	0	0	0	0	0	0	0	0	0	9.8	82.5	0	0	0	5.9	1.6284	0.3827	1	3.3622	0.0745	0.9694	1.9807	0.2645	0.9982
hsa-miR-6821-5p	0	0	0	0	0	0	0	0	0	0	0	0	0	5	0	0	0	0	0	0	0	0	0	0	0	0	0	0	0	0	0	6.1	0	0	0	0	0.3	1.6481	0.3834	1	1.3746	0.4691	0.9694	1.5106	0.398	0.9982
hsa-miR-4753-3p	0	0	0	0	0	0	0	37	0	0	1	0	0	5	0	0	0	0	0	0	0	0	0	0	0	38.5	0	0	0.5	0	0	6.1	0	0	0	0	0.4	1.6481	0.3834	1	-2.2136			1.3471	0.451	0.9982
hsa-miR-7110-3p	0	0	0	0	0	0	0	0	0	0	12	0	0	5	0	0	63	0	0	0	0	0	0	0	0	0	0	0	6.1	0	0	6.1	0	0	64.1	0	0.7	1.6481	0.3834	1	-0.5135	0.7854	0.9694	0.3736	0.8342	0.9982
hsa-miR-3150a-5p	0	0	0	12	0	0	0	0	0	0	0	0	0	0	0	0	0	0	0	0	0	8.6	0	0	0	0	0	0	0	0	0	0	0	0	0	0	0	-1.6369	0.3855	1				0	1
hsa-miR-4672	0	0	0	12	0	0	0	0	0	0	0	0	0	0	0	0	0	0	0	0	0	8.6	0	0	0	0	0	0	0	0	0	0	0	0	0	0	0	-1.6369	0.3855	1				0	1
hsa-miR-514a-5p	0	0	0	12	0	0	0	0	0	0	0	0	0	0	0	0	0	0	0	0	0	8.6	0	0	0	0	0	0	0	0	0	0	0	0	0	0	0	-1.6369	0.3855	1				0	1
hsa-miR-7850-5p	0	0	0	12	0	0	0	0	0	0	0	0	0	0	0	0	0	0	0	0	0	8.6	0	0	0	0	0	0	0	0	0	0	0	0	0	0	0	-1.6369	0.3855	1				0	1
hsa-miR-204-3p	0	0	0	0	0	36	0	0	53	0	0	5	0	0	0	0	0	0	0	0	0	0	0	38.9	0	0	62.9	0	0	5.7	0	0	0	0	0	0	2.5	1.6303	0.3887	1	-2.6218			-1.1871	0.5046	0.9982
hsa-miR-582-5p	0	0	0	0	0	0	0	0	0	0	6	5	0	0	0	0	0	0	0	0	0	0	0	0	0	0	0	0	3	5.7	0	0	0	0	0	0	0.5	1.6303	0.3887	1	0.05	0.9789	0.9977	0.7491	0.6749	0.9982
hsa-miR-26b-3p	1	22	91	39	44	0	1	66	0	0	30	2	22	17	34	0	108	46	1	14.8	49.2	27.9	34.6	0	1.1	68.6	0	0	15.2	2.3	14.4	20.7	82.5	0	109.9	40.8	26.8	0.9435	0.3909	1	0.7361	0.6043	0.9694	0.8981	0.4021	0.9982
hsa-miR-3179	0	13	23	4	0	0	0	0	0	0	11	3	0	0	1	0	2	0	0	8.7	12.4	2.9	0	0	0	0	0	0	5.6	3.4	0	0	2.4	0	2	0	2.1	-1.3298	0.3931	1	-0.293	0.8712	0.9708	-1.0557	0.4676	0.9982
hsa-miR-450a-5p	0	0	53	18	0	0	149	25	0	0	71	3	18	0	0	0	0	45	0	0	28.7	12.9	0	0	163.5	26	0	0	36	3.4	11.8	0	0	0	0	39.9	17.9	-1.427	0.3961	1	-0.7376	0.6655	0.9694	-1.2404	0.4131	0.9982
hsa-miR-17-3p	0	0	15	32	0	0	109	0	0	0	7	0	0	24	0	0	0	0	0	0	8.1	22.9	0	0	119.6	0	0	0	3.5	0	0	29.3	0	0	0	0	1.9	-1.561	0.3972	1	-1.3962	0.4618	0.9694	-2.3246	0.1926	0.9982
hsa-miR-18a-5p	186	134	336	298	34	0	47	80	155	45	316	41	139	122	0	0	0	0	189.2	90	181.8	213	26.8	0	51.6	83.2	183.9	71.5	160.1	47	90.8	148.9	0	0	0	0	85.4	-1.1654	0.3986	1	-1.2874	0.3992	0.9694	-1.316	0.2345	0.9982
hsa-miR-142-3p	323	659	1206	553	413	280	200	698	217	300	1574	193	1004	363	46	199	66	245	328.6	442.5	652.4	395.2	325	302.4	219.4	725.5	257.5	476.8	797.6	221.4	656	443	111.6	205.4	67.2	217.1	380.3	-0.4449	0.4011	1	-1.0022	0.1746	0.9694	-0.6925	0.1212	0.9982
hsa-miR-1-3p	729	244	1501	264	2516	2191	129	273	148	516	1743	277	1108	1422	141	562	148	149	741.7	163.8	812	188.7	1980.1	2366.3	141.5	283.8	175.6	820.2	883.3	317.8	724	1735.3	342	580.1	150.6	132	696.6	-0.6462	0.4015	1	0.0826	0.9222	0.978	-0.4359	0.5099	0.9982
hsa-miR-654-5p	0	10	33	5	44	0	77	0	1	168	42	0	84	21	0	0	218	101	0	6.7	17.9	3.6	34.6	0	84.5	0	1.2	267	21.3	0	54.9	25.6	0	0	221.8	89.5	46	1.1639	0.4026	1	-0.2046	0.9001	0.9713	0.4235	0.7451	0.9982
hsa-miR-3154	0	12	0	0	0	0	0	0	0	0	0	0	0	0	0	0	0	0	0	8.1	0	0	0	0	0	0	0	0	0	0	0	0	0	0	0	0	0	-1.5762	0.4035	1				0	1
hsa-miR-656-3p	0	0	0	0	0	0	0	0	0	39	0	0	8	0	0	0	0	0	0	0	0	0	0	0	0	0	0	62	0	0	5.2	0	0	0	0	0	0.3	1.5794	0.4037	1	-2.6543			1.4256	0.4252	0.9982
hsa-miR-6862-5p	0	27	0	0	0	0	0	0	0	0	5	0	8	0	0	0	0	0	0	18.1	0	0	0	0	0	0	0	0	2.5	0	5.2	0	0	0	0	0	0.4	1.5794	0.4037	1	0.129	0.9457	0.9906	0.7927	0.6573	0.9982
hsa-miR-542-3p	154	0	15	9	0	0	56	41	0	0	66	6	0	31	0	106	342	170	156.7	0	8.1	6.4	0	0	61.4	42.6	0	0	33.4	6.9	0	37.8	0	109.4	348	150.7	53.4	1.213	0.4055	1	1.7879	0.2541	0.9694	1.4509	0.2802	0.9982
hsa-let-7i-3p	41	6	26	6	2	0	0	0	0	0	15	17	0	0	127	0	0	0	41.7	4	14.1	4.3	1.6	0	0	0	0	0	7.6	19.5	0	0	308.1	0	0	0	5.3	-1.2553	0.4084	1	0.3171	0.8659	0.9694	-0.8735	0.5467	0.9982
hsa-miR-6509-5p	0	0	0	4	0	0	0	0	0	0	7	0	0	13	0	0	0	0	0	0	0	2.9	0	0	0	0	0	0	3.5	0	0	15.9	0	0	0	0	0.4	1.5354	0.4141	1	0.7578	0.6874	0.9694	-0.942	0.5983	0.9982
hsa-miR-374b-5p	214	170	514	484	257	268	291	143	68	37	654	216	264	298	105	97	64	177	217.7	114.1	278.1	345.9	202.3	289.4	319.3	148.6	80.7	58.8	331.4	247.8	172.5	363.7	254.7	100.1	65.1	156.9	208.2	-0.367	0.4197	1	0.3023	0.6787	0.9694	-0.159	0.718	0.9982
hsa-miR-361-3p	138	265	359	267	123	252	236	209	283	141	278	180	248	154	103	76	54	107	140.4	177.9	194.2	190.8	96.8	272.2	258.9	217.2	335.8	224.1	140.9	206.5	162	187.9	249.8	78.4	54.9	94.8	182.4	-0.3546	0.4209	1	-0.6007	0.3313	0.9694	-0.4679	0.1899	0.9982
hsa-miR-6513-3p	0	1	12	0	0	0	0	0	0	9	30	0	0	17	0	0	0	0	0	0.7	6.5	0	0	0	0	0	0	14.3	15.2	0	0	20.7	0	0	0	0	3.2	-1.5147	0.4222	1	-0.8002	0.6694	0.9694	-0.1152	0.9457	0.9982
hsa-miR-148a-5p	0	9	0	8	0	0	0	0	0	0	14	0	24	28	0	0	0	0	0	6	0	5.7	0	0	0	0	0	0	7.1	0	15.7	34.2	0	0	0	0	3.8	1.4485	0.4224	1	1.1564	0.5375	0.9694	1.4375	0.3865	0.9982
hsa-miR-1976	38	7	53	20	70	1	0	0	0	0	21	6	23	0	0	0	0	44	38.7	4.7	28.7	14.3	55.1	1.1	0	0	0	0	10.6	6.9	15	0	0	0	0	39	11.9	-1.0428	0.4258	1	1.1119	0.5342	0.9694	-0.566	0.6657	0.9982
hsa-miR-4698	0	0	13	0	0	0	0	0	0	0	0	0	0	0	0	0	0	0	0	0	7	0	0	0	0	0	0	0	0	0	0	0	0	0	0	0	0	-1.5024	0.426	1				0	1
hsa-miR-126-5p	985	1217	2428	1598	1464	825	393	1290	182	793	1961	790	2434	552	121	760	321	637	1002.1	817.1	1313.5	1142.1	1152.2	891	431.2	1340.8	216	1260.5	993.7	906.3	1590.4	673.6	293.5	784.4	326.6	564.5	872.2	-0.3676	0.4263	1	-0.3533	0.6197	0.9694	-0.3808	0.3612	0.9982
hsa-miR-24-2-5p	24	1	23	11	47	0	0	117	0	0	57	5	71	26	0	0	0	127	24.4	0.7	12.4	7.9	37	0	0	121.6	0	0	28.9	5.7	46.4	31.7	0	0	0	112.5	23.8	1.0831	0.4274	1	-0.3278	0.8436	0.9694	0.3461	0.7912	0.9982
hsa-let-7c-3p	0	11	0	0	0	0	0	0	0	0	0	0	0	0	0	0	0	0	0	7.4	0	0	0	0	0	0	0	0	0	0	0	0	0	0	0	0	0.4	-1.4945	0.4285	1				-1.0406	0.5604	0.9982
hsa-miR-6743-3p	0	11	0	0	0	0	0	0	0	0	0	0	0	0	0	0	0	0	0	7.4	0	0	0	0	0	0	0	0	0	0	0	0	0	0	0	0	0.4	-1.4945	0.4285	1				-1.0406	0.5604	0.9982
hsa-miR-378c	0	0	8	4	0	1	0	28	0	0	1	0	0	0	0	0	1	0	0	0	4.3	2.9	0	1.1	0	29.1	0	0	0.5	0	0	0	0	0	1	0	0.5	-1.4472	0.4294	1	-3.2279			-1.1417	0.488	0.9982
hsa-miR-12136	64	496	93	142	206	167	156	435	2	207	114	17	260	132	133	203	20	781	65.1	333	50.3	101.5	162.1	180.4	171.2	452.1	2.4	329	57.8	19.5	169.9	161.1	322.6	209.5	20.4	692.1	194.4	0.5745	0.4304	1	0.12	0.9133	0.9767	0.3794	0.605	0.9982
hsa-miR-320c	409	337	375	245	288	243	160	203	507	272	201	336	345	113	303	180	284	227	416.1	226.3	202.9	175.1	226.7	262.4	175.5	211	601.6	432.3	101.9	385.5	225.4	137.9	735	185.8	289	201.2	288.4	0.3484	0.4329	1	-0.0924	0.8969	0.9713	0.1584	0.7095	0.9982
hsa-miR-6741-5p	0	0	0	0	25	0	0	0	0	0	32	0	16	0	0	0	0	97	0	0	0	0	19.7	0	0	0	0	0	16.2	0	10.5	0	0	0	0	86	7.4	1.4592	0.4339	1	-0.8569	0.6481	0.9694	1.2828	0.4672	0.9982
hsa-miR-25-5p	0	58	7	85	0	0	174	144	95	9	48	70	0	7	1	0	0	0	0	38.9	3.8	60.8	0	0	190.9	149.7	112.7	14.3	24.3	80.3	0	8.5	2.4	0	0	0	38.1	-1.2741	0.436	1	-1.995	0.1992	0.9694	-1.7077	0.2021	0.9982
hsa-miR-98-5p	5681	3982	5695	3095	6129	1792	1747	2749	2806	9498	4935	1463	4880	2807	1853	3194	4253	9260	5779.8	2673.6	3080.8	2212	4823.6	1935.4	1916.7	2857.3	3329.6	15096.9	2500.8	1678.3	3188.6	3425.5	4494.8	3296.7	4327.5	8206.4	4156.9	0.3448	0.4367	1	-0.472	0.5077	0.9694	-0.0383	0.9354	0.9982
hsa-miR-513c-5p	0	0	0	10	0	0	0	0	0	0	0	0	0	0	0	0	0	0	0	0	0	7.1	0	0	0	0	0	0	0	0	0	0	0	0	0	0	0.4	-1.4651	0.4376	1				-1.0127	0.571	0.9982
hsa-miR-23a-5p	1	110	0	19	0	0	0	89	42	0	49	11	93	31	0	142	0	0	1	73.9	0	13.6	0	0	0	92.5	49.8	0	24.8	12.6	60.8	37.8	0	146.6	0	0	28.5	1.2423	0.4396	1	-0.1816	0.9053	0.9719	0.5439	0.6978	0.9982
hsa-miR-3188	7	0	0	0	0	338	0	0	0	0	7	0	0	0	0	0	0	0	7.1	0	0	0	0	365	0	0	0	0	3.5	0	0	0	0	0	0	0	0.6	-1.4582	0.4398	1	-1.3962	0.4618	0.9694	-1.3273	0.4575	0.9982
hsa-miR-4433b-3p	0	0	0	63	0	0	0	0	0	2725	183	0	71	42	1	6	0	40	0	0	0	45	0	0	0	0	0	4331.3	92.7	0	46.4	51.3	2.4	6.2	0	35.4	16.1	1.2851	0.4409	1	-4.331			0.4432	0.7732	0.9982
hsa-miR-5010-3p	0	0	11	26	0	0	0	0	52	0	29	4	0	0	0	0	0	0	0	0	6	18.6	0	0	0	0	61.7	0	14.7	4.6	0	0	0	0	0	0	5.9	-1.4431	0.4414	1	-3.2364	0.0753	0.9694	-2.503	0.1329	0.9982
hsa-miR-3173-5p	69	111	172	166	205	183	620	68	205	110	87	63	168	62	116	57	250	180	70.2	74.5	93	118.6	161.3	197.6	680.2	70.7	243.3	174.8	44.1	72.3	109.8	75.7	281.4	58.8	254.4	159.5	163.4	-0.4792	0.449	1	0.1485	0.8405	0.9694	-0.273	0.6215	0.9982
hsa-miR-873-5p	2	0	98	13	0	0	92	46	0	0	1	36	33	0	0	112	284	0	2	0	53	9.3	0	0	100.9	47.8	0	0	0.5	41.3	21.6	0	0	115.6	289	0	37.8	1.1657	0.4493	1	1.7793	0.2958	0.9694	1.4403	0.3152	0.9982
hsa-let-7f-2-3p	0	0	12	0	0	0	0	0	0	0	0	0	0	0	0	0	0	0	0	0	6.5	0	0	0	0	0	0	0	0	0	0	0	0	0	0	0	0	-1.4279	0.4494	1				0	1
hsa-miR-548b-5p	0	0	0	0	0	0	0	0	0	0	0	0	0	0	0	0	0	5	0	0	0	0	0	0	0	0	0	0	0	0	0	0	0	0	0	4.4	0.2	1.4251	0.4515	1	1.1625	0.5407	0.9694	1.2915	0.4701	0.9982
hsa-miR-136-3p	70	0	59	27	29	0	0	70	0	18	58	6	143	26	0	154	0	42	71.2	0	31.9	19.3	22.8	0	0	72.8	0	28.6	29.4	6.9	93.4	31.7	0	159	0	37.2	33.6	1.0167	0.4532	1	0.4143	0.766	0.9694	0.7949	0.5016	0.9982
hsa-miR-27a-3p	1679	3738	7892	5358	3673	4334	2652	3068	2156	686	6270	2564	3544	3034	925	3574	2610	1334	1708.2	2509.7	4269.3	3829.4	2890.7	4680.8	2909.7	3188.9	2558.3	1090.4	3177.3	2941.4	2315.7	3702.5	2243.7	3688.9	2655.7	1182.2	2863.5	-0.2748	0.4532	1	0.0911	0.8724	0.9708	-0.1557	0.6319	0.9982
hsa-miR-126-3p	8793	11744	20574	11304	10208	7139	5599	6979	4371	5427	20117	4760	11507	9522	6647	8474	8819	10612	8945.9	7885.1	11129.7	8079.1	8033.8	7710.2	6143	7253.9	5186.7	8626.1	10194.2	5460.6	7518.8	11620.2	16123.4	8746.4	8973.5	9404.6	8724.2	0.2227	0.4548	1	0.3135	0.532	0.9694	0.2561	0.2957	0.9982
hsa-miR-326	82	109	31	7	4	0	0	0	0	21	80	2	25	43	0	0	0	0	83.4	73.2	16.8	5	3.1	0	0	0	0	33.4	40.5	2.3	16.3	52.5	0	0	0	0	18.1	-1.0968	0.4559	1	-0.6041	0.7277	0.9694	-0.987	0.4664	0.9982
hsa-miR-2115-3p	0	10	0	0	0	0	0	0	0	0	0	0	0	0	0	0	0	0	0	6.7	0	0	0	0	0	0	0	0	0	0	0	0	0	0	0	0	0.4	-1.4052	0.4567	1				-0.9692	0.5877	0.9982
hsa-miR-320b	698	991	458	427	490	455	263	403	786	470	338	587	487	247	576	416	360	506	710.1	665.4	247.8	305.2	385.6	491.4	288.6	418.9	932.7	747.1	171.3	673.4	318.2	301.4	1397.2	429.4	366.3	448.4	516.6	0.3431	0.4624	1	0.013	0.9852	1	0.2006	0.6399	0.9982
hsa-miR-301a-3p	0	8	19	7	17	0	0	11	0	0	29	0	6	23	0	53	0	0	0	5.4	10.3	5	13.4	0	0	11.4	0	0	14.7	0	3.9	28.1	0	54.7	0	0	8.2	1.0985	0.4628	1	0.6198	0.7171	0.9694	0.9819	0.4631	0.9982
hsa-miR-125a-3p	0	40	0	8	0	0	0	0	49	0	31	1	16	0	0	70	11	0	0	26.9	0	5.7	0	0	0	0	58.1	0	15.7	1.1	10.5	0	0	72.3	11.2	0	11.2	1.2072	0.4643	1	-0.3676	0.8233	0.9694	0.3822	0.8	0.9982
hsa-miR-381-3p	0	0	40	0	0	0	0	0	0	18	10	0	176	5	0	0	0	0	0	0	21.6	0	0	0	0	0	0	28.6	5.1	0	115	6.1	0	0	0	0	3.4	1.3812	0.465	1	-2.0822	0.2338	0.9694	-1.5818	0.3463	0.9982
hsa-miR-324-5p	0	13	66	34	0	0	0	0	0	19	66	29	65	31	0	60	0	0	0	8.7	35.7	24.3	0	0	0	0	0	30.2	33.4	33.3	42.5	37.8	0	61.9	0	0	17.1	1.1094	0.4665	1	0.5083	0.7517	0.9694	0.8692	0.5324	0.9982
hsa-miR-4433b-5p	7803	7146	2810	1617	1142	1447	887	971	3238	11764	3885	103	7654	3692	1372	2449	1598	12131	7938.7	4797.9	1520.1	1155.7	898.8	1562.8	973.2	1009.2	3842.2	18698.7	1968.7	118.2	5001.2	4505.5	3328	2527.7	1626	10750.7	4012.4	0.5541	0.467	1	-0.5793	0.5604	0.9694	-0.0184	0.9797	0.9982
hsa-miR-548a-3p	0	0	5	0	0	0	0	0	0	0	11	11	0	0	0	0	0	0	0	0	2.7	0	0	0	0	0	0	0	5.6	12.6	0	0	0	0	0	0	1.2	1.3632	0.4687	1	0.1993	0.9157	0.977	0.7291	0.6822	0.9982
hsa-miR-514a-3p	0	0	0	9	0	0	0	0	0	0	0	0	0	0	0	0	0	0	0	0	0	6.4	0	0	0	0	0	0	0	0	0	0	0	0	0	0	0.4	-1.3662	0.4694	1				-0.937	0.6002	0.9982
hsa-miR-548at-5p	0	0	0	9	0	0	0	0	0	0	0	0	0	0	0	0	0	0	0	0	0	6.4	0	0	0	0	0	0	0	0	0	0	0	0	0	0	0.4	-1.3662	0.4694	1				-0.937	0.6002	0.9982
hsa-miR-150-3p	0	371	141	88	62	0	342	219	128	81	75	109	21	16	48	103	0	0	0	249.1	76.3	62.9	48.8	0	375.2	227.6	151.9	128.7	38	125	13.7	19.5	116.4	106.3	0	0	96.6	-0.9507	0.4702	1	-1.1626	0.357	0.9694	-1.0682	0.3188	0.9982
hsa-miR-6813-3p	0	0	0	0	0	0	0	0	0	0	0	0	6	0	0	0	0	0	0	0	0	0	0	0	0	0	0	0	0	0	3.9	0	0	0	0	0	0.2	1.3647	0.4709	1	1.0916	0.5658	0.9694	1.2301	0.4915	0.9982
hsa-miR-3157-3p	0	0	0	29	0	0	0	0	0	0	0	0	6	0	0	0	0	0	0	0	0	20.7	0	0	0	0	0	0	0	0	3.9	0	0	0	0	0	0.2	1.3647	0.4709	1	1.0916	0.5658	0.9694	1.2301	0.4915	0.9982
hsa-miR-409-3p	685	580	906	195	263	57	0	330	109	2378	308	113	2083	196	92	553	0	1193	696.9	389.4	490.1	139.4	207	61.6	0	343	129.3	3779.8	156.1	129.6	1361.1	239.2	223.2	570.8	0	1057.3	554.1	0.7929	0.4714	1	-0.9293	0.4563	0.9694	-0.1677	0.8678	0.9982
hsa-miR-6820-5p	0	0	0	0	0	0	0	0	0	0	0	4	0	0	0	0	0	0	0	0	0	0	0	0	0	0	0	0	0	4.6	0	0	0	0	0	0	0.3	1.355	0.4741	1	1.1767	0.5358	0.9694	1.18	0.5093	0.9982
hsa-miR-211-5p	0	0	38	0	0	0	0	0	0	0	18	0	0	4	0	0	0	88	0	0	20.6	0	0	0	0	0	0	0	9.1	0	0	4.9	0	0	0	78	0.8	1.355	0.4741	1	-1.0543	0.5758	0.9694	-0.1189	0.9468	0.9982
hsa-miR-548o-3p	0	36	19	6	0	0	1	0	45	5	13	42	1	0	0	53	0	0	0	24.2	10.3	4.3	0	0	1.1	0	53.4	7.9	6.6	48.2	0.7	0	0	54.7	0	0	11.7	1.1256	0.4745	1	-0.1444	0.931	0.9814	0.4951	0.7171	0.9982
hsa-miR-548bc	0	0	11	0	0	0	0	15	0	0	6	0	0	0	0	0	0	0	0	0	6	0	0	0	0	15.6	0	0	3	0	0	0	0	0	0	0	1.4	-1.3472	0.4756	1	-2.909	0.1232	0.9694	-2.033	0.2546	0.9982
hsa-miR-1296-5p	0	0	11	0	0	0	0	0	0	0	0	0	0	0	0	0	0	0	0	0	6	0	0	0	0	0	0	0	0	0	0	0	0	0	0	0	0.3	-1.3472	0.4756	1				-0.8982	0.6154	0.9982
hsa-miR-7151-3p	0	0	11	0	0	0	0	0	0	0	0	0	0	0	0	0	0	0	0	0	6	0	0	0	0	0	0	0	0	0	0	0	0	0	0	0	0.3	-1.3472	0.4756	1				-0.8982	0.6154	0.9982
hsa-miR-20a-5p	358	326	228	580	370	0	304	205	267	106	398	142	494	280	30	29	75	124	364.2	218.9	123.3	414.5	291.2	0	333.5	213.1	316.8	168.5	201.7	162.9	322.8	341.7	72.8	29.9	76.3	109.9	209	-0.6	0.477	1	-0.4594	0.5433	0.9694	-0.5706	0.3958	0.9982
hsa-miR-199a-5p	414	576	574	297	511	1161	47	453	10	188	804	52	1014	501	1	139	59	419	421.2	386.7	310.5	212.3	402.2	1253.9	51.6	470.8	11.9	298.8	407.4	59.7	662.6	611.4	2.4	143.5	60	371.3	341	-0.6068	0.4774	1	-0.1108	0.9203	0.978	-0.4694	0.5384	0.9982
hsa-miR-18b-5p	6	2	14	14	0	0	0	2	1	0	20	7	2	0	0	0	0	0	6.1	1.3	7.6	10	0	0	0	2.1	1.2	0	10.1	8	1.3	0	0	0	0	0	2.7	-1.0952	0.4781	1	-1.0224	0.5389	0.9694	-1.1931	0.3437	0.9982
hsa-miR-130b-3p	0	154	168	95	147	0	65	71	52	10	143	129	262	100	2	109	72	127	0	103.4	90.9	67.9	115.7	0	71.3	73.8	61.7	15.9	72.5	148	171.2	122	4.9	112.5	73.3	112.5	78.7	0.6926	0.4784	1	0.8783	0.2823	0.9694	0.7577	0.3374	0.9982
hsa-miR-532-3p	0	0	85	41	0	0	0	0	0	0	51	5	21	0	0	0	0	0	0	0	46	29.3	0	0	0	0	0	0	25.8	5.7	13.7	0	0	0	0	0	6.7	-1.2821	0.4817	1	-0.7907	0.6731	0.9694	-1.1345	0.5037	0.9982
hsa-miR-200b-5p	0	6	0	3	0	0	0	0	0	0	0	0	0	0	0	0	0	0	0	4	0	2.1	0	0	0	0	0	0	0	0	0	0	0	0	0	0	0.3	-1.327	0.4823	1				-0.9117	0.6101	0.9982
hsa-miR-769-5p	0	12	28	9	0	1	0	0	1	85	16	0	26	43	0	1	0	1	0	8.1	15.1	6.4	0	1.1	0	0	1.2	135.1	8.1	0	17	52.5	0	1	0	0.9	6.4	1.0158	0.4834	1	-1.3481	0.4035	0.9694	1.1811	0.3378	0.9982
hsa-miR-450b-5p	0	14	136	118	82	1	166	64	0	25	86	40	34	30	0	0	0	109	0	9.4	73.6	84.3	64.5	1.1	182.1	66.5	0	39.7	43.6	45.9	22.2	36.6	0	0	0	96.6	42.6	-0.9053	0.4834	1	-0.2939	0.844	0.9694	-0.7408	0.5136	0.9982
hsa-miR-125b-5p	358	762	2095	917	2373	2590	202	771	981	83	1589	512	136	602	152	2764	190	275	364.2	511.6	1133.3	655.4	1867.6	2797.2	221.6	801.4	1164.1	131.9	805.2	587.4	88.9	734.7	368.7	2852.8	193.3	243.7	862.4	-0.541	0.4841	1	-0.0327	0.9723	0.9977	-0.3782	0.5697	0.9982
hsa-miR-497-5p	0	25	26	10	1	3	1	0	54	0	6	16	42	29	0	0	0	1	0	16.8	14.1	7.1	0.8	3.2	1.1	0	64.1	0	3	18.4	27.4	35.4	0	0	0	0.9	10.7	0.8498	0.492	1	-0.3703	0.8222	0.9694	0.2038	0.866	0.9982
hsa-miR-181b-5p	143	275	270	211	114	400	183	579	239	286	337	485	348	68	1	527	86	473	145.5	184.6	146.1	150.8	89.7	432	200.8	601.8	283.6	454.6	170.8	556.4	227.4	83	2.4	543.9	87.5	419.2	265.6	0.5189	0.4921	1	-0.4148	0.6713	0.9694	0.0762	0.9051	0.9982
hsa-miR-6810-3p	0	18	0	0	0	0	0	0	0	0	0	0	60	6	0	0	0	0	0	12.1	0	0	0	0	0	0	0	0	0	0	39.2	7.3	0	0	0	0	3.3	1.2775	0.4938	1	2.9986	0.1126	0.9694	1.5607	0.3796	0.9982
hsa-miR-7976	47	126	106	88	90	0	0	37	0	0	50	25	0	34	80	84	62	183	47.8	84.6	57.3	62.9	70.8	0	0	38.5	0	0	25.3	28.7	0	41.5	194.1	86.7	63.1	162.2	53.5	0.7527	0.495	1	1.9829	0.1446	0.9694	1.0998	0.311	0.9982
hsa-miR-539-3p	83	78	85	16	0	0	0	79	0	40	12	12	87	4	0	0	0	0	84.4	52.4	46	11.4	0	0	0	82.1	0	63.6	6.1	13.8	56.8	4.9	0	0	0	0	23.4	-1.0525	0.4994	1	-1.3842	0.3945	0.9694	-1.2733	0.3452	0.9982
hsa-miR-15b-3p	60	59	237	424	200	201	175	249	39	40	362	133	325	75	87	274	281	173	61	39.6	128.2	303	157.4	217.1	192	258.8	46.3	63.6	183.4	152.6	212.4	91.5	211	282.8	285.9	153.3	168.9	0.3352	0.5006	1	0.4954	0.4609	0.9694	0.3964	0.3851	0.9982
hsa-miR-7-5p	697	772	1569	2627	2318	868	1542	845	1133	394	1507	1188	1070	563	1174	1453	1519	2152	709.1	518.3	848.8	1877.5	1824.3	937.4	1691.8	878.3	1344.4	626.3	763.7	1362.9	699.1	687.1	2847.7	1499.7	1545.6	1907.1	1253.8	0.3149	0.5013	1	0.7288	0.2201	0.9694	0.4579	0.2335	0.9982
hsa-miR-376c-3p	29	2	126	27	0	333	0	66	0	18	46	1	119	59	0	50	0	0	29.5	1.3	68.2	19.3	0	359.6	0	68.6	0	28.6	23.3	1.1	77.8	72	0	51.6	0	0	44.5	-0.9927	0.5014	1	-0.0542	0.9721	0.9977	-0.7701	0.5518	0.9982
hsa-miR-519a-5p	0	0	10	0	0	0	0	0	0	0	3	0	0	0	0	0	0	0	0	0	5.4	0	0	0	0	0	0	0	1.5	0	0	0	0	0	0	0	0.4	-1.2592	0.5051	1	-0.8241	0.6645	0.9694	-1.0022	0.5751	0.9982
hsa-miR-181d-5p	41	37	83	0	1	0	0	180	0	55	23	32	95	31	37	1	0	2	41.7	24.8	44.9	0	0.8	0	0	187.1	0	87.4	11.7	36.7	62.1	37.8	89.7	1	0	1.8	34.9	0.8845	0.5051	1	-0.9525	0.4888	0.9694	-0.1284	0.9165	0.9982
hsa-miR-24-3p	12759	17617	34603	11759	13457	20112	10161	10780	5767	3067	22592	8103	18910	16150	7726	15124	17434	19677	12980.9	11828.3	18718.9	8404.3	10590.8	21721.1	11148.3	11204.6	6843.2	4874.9	11448.4	9295.7	12356	19708.6	18740.7	15610.1	17739.4	17438.1	13369.6	0.2148	0.5055	1	0.8663	0.0871	0.9694	0.4221	0.1751	0.9982
hsa-miR-6511b-3p	55	105	50	48	0	0	124	1	57	0	36	23	38	58	65	0	92	237	56	70.5	27	34.3	0	0	136	1	67.6	0	18.2	26.4	24.8	70.8	157.7	0	93.6	210	55.2	0.7538	0.5059	1	1.6875	0.1958	0.9694	1.0474	0.324	0.9982
hsa-miR-1275	0	0	0	8	0	0	0	0	53	0	0	0	0	0	0	0	0	0	0	0	0	5.7	0	0	0	0	62.9	0	0	0	0	0	0	0	0	0	0.3	-1.2561	0.5061	1	-4.065			-0.8629	0.6293	0.9982
hsa-miR-1914-5p	0	0	0	8	0	0	0	0	0	0	0	0	0	0	0	0	0	0	0	0	0	5.7	0	0	0	0	0	0	0	0	0	0	0	0	0	0	0.3	-1.2561	0.5061	1				-0.8629	0.6293	0.9982
hsa-miR-219a-1-3p	0	0	0	8	0	0	0	0	0	0	0	0	0	0	0	0	0	0	0	0	0	5.7	0	0	0	0	0	0	0	0	0	0	0	0	0	0	0.3	-1.2561	0.5061	1				-0.8629	0.6293	0.9982
hsa-miR-6750-5p	0	0	0	8	0	0	0	0	0	0	0	0	0	0	0	0	0	0	0	0	0	5.7	0	0	0	0	0	0	0	0	0	0	0	0	0	0	0.3	-1.2561	0.5061	1				-0.8629	0.6293	0.9982
hsa-miR-93-3p	0	2	1	26	0	0	0	0	9	0	45	0	0	6	0	155	1	0	0	1.3	0.5	18.6	0	0	0	0	10.7	0	22.8	0	0	7.3	0	160	1	0	3.5	1.1483	0.5065	1	-1.9336	0.2399	0.9694	-1.5022	0.2959	0.9982
hsa-miR-532-5p	420	100	126	280	136	178	0	39	73	54	144	36	194	17	36	65	140	244	427.3	67.1	68.2	200.1	107	192.2	0	40.5	86.6	85.8	73	41.3	126.8	20.7	87.3	67.1	142.5	216.2	113.9	-0.5569	0.5072	1	0.4918	0.4945	0.9694	-0.2768	0.692	0.9982
hsa-miR-339-3p	0	84	139	145	70	2	56	58	1	72	135	65	233	114	0	47	214	0	0	56.4	75.2	103.6	55.1	2.2	61.4	60.3	1.2	114.4	68.4	74.6	152.2	139.1	0	48.5	217.7	0	68.4	0.7567	0.5099	1	0.5245	0.6897	0.9694	0.6741	0.4937	0.9982
hsa-miR-6721-5p	23	33	0	0	36	0	0	17	0	171	16	0	30	13	0	0	0	187	23.4	22.2	0	0	28.3	0	0	17.7	0	271.8	8.1	0	19.6	15.9	0	0	0	165.7	8.4	1.1035	0.5108	1	-2.7526			-0.5139	0.7024	0.9982
hsa-miR-194-5p	240	526	1585	550	409	229	408	234	70	42	666	418	198	277	181	517	214	20	244.2	353.2	857.4	393.1	321.9	247.3	447.6	243.2	83.1	66.8	337.5	479.5	129.4	338	439	533.6	217.7	17.7	319.5	-0.4045	0.5109	1	0.6956	0.4194	0.9694	-0.0859	0.8792	0.9982
hsa-miR-4659a-3p	0	0	0	2	0	0	0	0	0	0	17	0	0	6	0	0	0	0	0	0	0	1.4	0	0	0	0	0	0	8.6	0	0	7.3	0	0	0	0	0.5	1.2413	0.511	1	-0.6781	0.7187	0.9694	1.3116	0.4627	0.9982
hsa-miR-379-3p	0	0	10	0	0	0	0	0	0	0	0	6	0	12	0	0	0	0	0	0	5.4	0	0	0	0	0	0	0	0	6.9	0	14.6	0	0	0	0	1.5	1.2307	0.5112	1	2.3936	0.206	0.9694	1.5424	0.3862	0.9982
hsa-miR-330-3p	0	29	56	11	0	0	0	109	0	64	61	0	118	82	0	0	0	0	0	19.5	30.3	7.9	0	0	0	113.3	0	101.7	30.9	0	77.1	100.1	0	0	0	0	26.7	1.1585	0.5114	1	-0.8874	0.6146	0.9694	-0.0928	0.9521	0.9982
hsa-miR-150-5p	1058	4017	6078	2826	1678	1471	2305	2500	864	166	3552	1981	977	775	1478	1460	2059	601	1076.4	2697.1	3288	2019.8	1320.6	1588.7	2529	2598.5	1025.2	263.9	1800	2272.6	638.4	945.8	3585.1	1506.9	2095.1	532.6	1765.7	-0.3288	0.5145	1	0.2012	0.7992	0.9694	-0.1494	0.7574	0.9982
hsa-miR-200b-3p	0	0	15	29	46	0	0	0	0	23	25	0	0	13	3	0	0	0	0	0	8.1	20.7	36.2	0	0	0	0	36.6	12.7	0	0	15.9	7.3	0	0	0	7.6	-1.1135	0.518	1	-1.2777	0.4767	0.9694	-1.2639	0.4101	0.9982
hsa-miR-30a-3p	112	161	518	181	470	542	116	48	96	20	189	115	121	149	189	58	222	211	113.9	108.1	280.2	129.4	369.9	585.4	127.3	49.9	113.9	31.8	95.8	131.9	79.1	181.8	458.5	59.9	225.9	187	185	-0.3752	0.5183	1	1.3253	0.0687	0.9694	0.0479	0.9327	0.9982
hsa-miR-337-3p	77	29	137	46	21	0	0	62	60	31	31	8	125	0	0	0	0	0	78.3	19.5	74.1	32.9	16.5	0	0	64.4	71.2	49.3	15.7	9.2	81.7	0	0	0	0	0	28.5	-0.999	0.5201	1	-1.5163	0.3456	0.9694	-1.3376	0.28	0.9982
hsa-miR-103a-2-5p	4	0	0	2	55	0	0	0	0	0	8	0	0	0	0	0	0	0	4.1	0	0	1.4	43.3	0	0	0	0	0	4.1	0	0	0	0	0	0	0	0.5	-1.2128	0.521	1	-1.5071	0.4268	0.9694	-1.2422	0.4869	0.9982
hsa-miR-1237-3p	0	8	0	0	0	51	0	0	0	0	2	0	0	22	0	0	0	0	0	5.4	0	0	0	55.1	0	0	0	0	1	0	0	26.8	0	0	0	0	0.4	-1.1974	0.5263	1	-0.6115	0.7477	0.9694	-0.9366	0.6003	0.9982
hsa-miR-525-5p	0	8	0	0	0	0	0	0	0	0	0	0	0	0	0	0	0	0	0	5.4	0	0	0	0	0	0	0	0	0	0	0	0	0	0	0	0	0.3	-1.1974	0.5263	1				-0.828	0.6433	0.9982
hsa-miR-500a-3p	93	282	172	228	121	299	149	116	156	44	245	156	228	29	10	182	202	90	94.6	189.3	93	163	95.2	322.9	163.5	120.6	185.1	69.9	124.2	179	149	35.4	24.3	187.9	205.5	79.8	137.9	-0.3519	0.5269	1	-0.0123	0.9867	1	-0.2527	0.5783	0.9982
hsa-miR-95-3p	1	52	30	51	27	0	69	32	84	10	82	90	48	30	53	0	27	0	1	34.9	16.2	36.5	21.2	0	75.7	33.3	99.7	15.9	41.6	103.2	31.4	36.6	128.6	0	27.5	0	39.1	0.7291	0.5276	1	-0.0142	0.9909	1	0.4136	0.6622	0.9982
hsa-miR-10b-5p	1070	2552	6587	4181	5298	5797	4314	2785	2104	1116	3636	5083	1729	1156	1079	4118	2606	1534	1088.6	1713.4	3563.3	2988.2	4169.6	6260.8	4733.2	2894.7	2496.6	1773.9	1842.5	5831.1	1129.7	1410.7	2617.3	4250.4	2651.7	1359.5	2932	-0.334	0.5312	1	0.2924	0.6503	0.9694	-0.1461	0.7369	0.9982
hsa-miR-27b-5p	0	17	2	11	271	1	0	0	0	30	25	0	12	0	0	0	0	28	0	11.4	1.1	7.9	213.3	1.1	0	0	0	47.7	12.7	0	7.8	0	0	0	0	24.8	5.3	-0.8929	0.5314	1	-1.1221	0.5317	0.9694	-1.9048	0.1521	0.9982
hsa-miR-6777-3p	0	0	0	6	0	0	0	0	0	0	8	13	0	0	0	0	0	0	0	0	0	4.3	0	0	0	0	0	0	4.1	14.9	0	0	0	0	0	0	0.5	1.1717	0.5324	1	0.6099	0.746	0.9694	-1.1413	0.5231	0.9982
hsa-miR-556-5p	0	0	19	0	0	0	0	0	0	0	24	0	45	6	0	0	0	0	0	0	10.3	0	0	0	0	0	0	0	12.2	0	29.4	7.3	0	0	0	0	3.3	1.1604	0.5345	1	0.4395	0.8146	0.9694	0.8586	0.6236	0.9982
hsa-miR-6726-3p	0	0	15	0	0	0	0	0	0	0	0	0	35	5	0	0	0	0	0	0	8.1	0	0	0	0	0	0	0	0	0	22.9	6.1	0	0	0	0	2.1	1.1557	0.5365	1	2.6259	0.1651	0.9694	1.4808	0.4049	0.9982
hsa-miR-146a-5p	2526	3086	5508	2849	1078	1038	1018	3194	1257	3080	4071	1377	5068	2195	730	1409	964	4057	2569.9	2072	2979.6	2036.2	848.4	1121	1116.9	3319.8	1491.6	4895.6	2063	1579.7	3311.5	2678.7	1770.7	1454.3	980.9	3595.4	2215.8	0.2779	0.5377	1	-0.3861	0.5258	0.9694	-0.0208	0.959	0.9982
hsa-miR-425-5p	1049	2302	2286	1981	821	688	893	1398	1086	466	3573	1519	3211	1092	749	576	306	1518	1067.2	1545.6	1236.6	1415.8	646.1	743	979.8	1453.1	1288.7	740.7	1810.6	1742.6	2098.1	1332.6	1816.8	594.5	311.4	1345.3	1231.6	0.2871	0.5378	1	-0.0048	0.9942	1	0.1656	0.661	0.9982
hsa-miR-616-3p	0	0	9	0	0	0	0	0	0	51	5	0	0	0	0	0	0	82	0	0	4.9	0	0	0	0	0	0	81.1	2.5	0	0	0	0	0	0	72.7	0.4	-1.1623	0.5386	1	-4.3014			-1.052	0.5562	0.9982
hsa-miR-3136-5p	0	0	9	0	0	0	0	0	0	0	2	0	0	0	0	0	0	0	0	0	4.9	0	0	0	0	0	0	0	1	0	0	0	0	0	0	0	0.3	-1.1623	0.5386	1	-0.6115	0.7477	0.9694	-0.8916	0.618	0.9982
hsa-miR-10399-5p	0	0	9	0	0	0	0	0	0	0	0	0	0	0	0	0	0	0	0	0	4.9	0	0	0	0	0	0	0	0	0	0	0	0	0	0	0	0.3	-1.1623	0.5386	1				-0.7785	0.6633	0.9982
hsa-miR-6501-5p	0	0	9	0	0	0	0	0	0	0	0	0	0	0	0	0	0	0	0	0	4.9	0	0	0	0	0	0	0	0	0	0	0	0	0	0	0	0.3	-1.1623	0.5386	1				-0.7785	0.6633	0.9982
hsa-miR-1294	78	80	240	131	140	52	198	185	212	102	50	26	102	23	6	71	128	251	79.4	53.7	129.8	93.6	110.2	56.2	217.2	192.3	251.6	162.1	25.3	29.8	66.6	28.1	14.6	73.3	130.2	222.4	107.6	-0.3818	0.54	1	-0.883	0.3111	0.9694	-0.6047	0.2771	0.9982
hsa-miR-103a-3p	4127	6998	5186	4936	3786	2676	2296	3312	1683	4989	8202	2477	8299	3427	954	3753	3235	5272	4198.8	4698.5	2805.4	3527.8	2979.6	2890.1	2519.1	3442.5	1997.1	7929.9	4156.3	2841.6	5422.6	4182.1	2314.1	3873.6	3291.7	4672.1	3763.5	0.1833	0.5401	1	-0.1751	0.7506	0.9694	0.0228	0.9404	0.9982
hsa-miR-106a-5p	0	27	118	28	0	136	132	17	0	13	64	23	151	6	0	0	0	70	0	18.1	63.8	20	0	146.9	144.8	17.7	0	20.7	32.4	26.4	98.7	7.3	0	0	0	62	36.6	-0.843	0.5426	1	0.5277	0.7254	0.9694	-0.5214	0.6676	0.9982
hsa-miR-629-5p	474	489	366	461	480	228	816	270	225	124	358	287	573	178	113	482	374	368	482.2	328.3	198	329.5	377.8	246.2	895.3	280.6	267	197.1	181.4	329.2	374.4	217.2	274.1	497.5	380.6	326.1	343.5	-0.2508	0.5442	1	0.5675	0.2065	0.9694	-0.0038	0.9914	0.9997
hsa-miR-1301-3p	278	657	226	129	118	248	0	300	29	365	283	71	642	164	132	326	80	441	282.8	441.1	122.3	92.2	92.9	267.8	0	311.8	34.4	580.2	143.4	81.5	419.5	200.1	320.2	336.5	81.4	390.8	233.3	0.4924	0.5468	1	-0.0076	0.9925	1	0.2688	0.7078	0.9982
hsa-miR-423-3p	3856	6615	3968	1880	1687	1673	1485	2951	1576	2525	4315	702	4927	3162	732	2097	2420	6969	3923	4441.4	2146.5	1343.7	1327.7	1806.9	1629.3	3067.2	1870.1	4013.4	2186.6	805.3	3219.3	3858.7	1775.6	2164.4	2462.4	6176.1	2678.8	0.3053	0.5476	1	0.0909	0.8885	0.9713	0.2096	0.61	0.9982
hsa-miR-3613-3p	0	0	5	3	0	0	0	0	0	0	1	0	0	0	0	0	0	0	0	0	2.7	2.1	0	0	0	0	0	0	0.5	0	0	0	0	0	0	0	0.3	-1.1345	0.5484	1	-0.3184	0.867	0.9694	-0.8305	0.6423	0.9982
hsa-miR-6515-5p	0	0	0	7	0	0	0	0	0	0	1	0	0	0	0	0	0	0	0	0	0	5	0	0	0	0	0	0	0.5	0	0	0	0	0	0	0	0.3	-1.1318	0.5493	1	-0.3184	0.867	0.9694	-0.8417	0.6378	0.9982
hsa-miR-653-3p	0	0	0	7	0	0	0	0	0	0	0	0	0	0	0	0	0	0	0	0	0	5	0	0	0	0	0	0	0	0	0	0	0	0	0	0	0.3	-1.1318	0.5493	1				-0.7827	0.6615	0.9982
hsa-miR-3613-5p	785	1421	5814	4463	5323	2905	2255	1547	2089	439	3514	2025	1550	959	938	3369	2961	1491	798.6	954.1	3145.1	3189.8	4189.2	3137.4	2474.1	1607.9	2478.8	697.8	1780.7	2323.1	1012.8	1170.3	2275.3	3477.3	3012.9	1321.4	2169.3	-0.2931	0.5514	1	0.3363	0.5869	0.9694	-0.0915	0.8306	0.9982
hsa-miR-502-5p	0	0	0	0	0	0	0	0	0	0	3	0	4	0	0	0	0	0	0	0	0	0	0	0	0	0	0	0	1.5	0	2.6	0	0	0	0	0	0.2	1.1251	0.5524	1	-0.0198	0.9917	1	0.5458	0.7602	0.9982
hsa-miR-363-5p	0	0	0	23	0	0	0	0	0	0	8	0	4	0	0	0	0	0	0	0	0	16.4	0	0	0	0	0	0	4.1	0	2.6	0	0	0	0	0	0.4	1.1251	0.5524	1	-0.7483	0.6927	0.9694	0.0816	0.9636	0.9982
hsa-miR-197-3p	1689	2322	1059	948	525	588	724	939	278	472	1211	307	657	790	512	258	937	1097	1718.4	1559	572.9	677.5	413.2	635	794.3	976	329.9	750.2	613.7	352.2	429.3	964.1	1241.9	266.3	953.4	972.2	790	-0.2953	0.5539	1	0.163	0.803	0.9694	-0.1502	0.7227	0.9982
hsa-miR-32-5p	59	365	1194	709	397	333	372	82	282	0	819	376	372	276	0	259	325	243	60	245.1	645.9	506.7	312.4	359.6	408.1	85.2	334.6	0	415	431.3	243.1	336.8	0	267.3	330.7	215.4	288.7	-0.4464	0.5562	1	0.2785	0.8236	0.9694	-0.2219	0.782	0.9982
hsa-miR-331-3p	175	11	59	35	122	1	0	10	0	0	100	0	15	17	0	0	0	155	178	7.4	31.9	25	96	1.1	0	10.4	0	0	50.7	0	9.8	20.7	0	0	0	137.4	31.6	-0.8406	0.5572	1	0.4341	0.805	0.9694	-0.5012	0.7076	0.9982
hsa-miR-1303	18	0	0	0	0	80	122	0	0	0	9	3	24	1	0	78	0	0	18.3	0	0	0	0	86.4	133.9	0	0	0	4.6	3.4	15.7	1.2	0	80.5	0	0	7.6	-0.9567	0.5593	1	2.4736	0.1471	0.9694	-1.2289	0.4133	0.9982
hsa-miR-191-5p	5688	8711	6880	6522	5927	2959	2861	4522	3255	4960	12405	2954	6573	4472	1950	5145	4514	7570	5786.9	5848.7	3721.8	4661.4	4664.6	3195.7	3139	4700.1	3862.4	7883.8	6286.2	3388.8	4294.9	5457.4	4730	5310.4	4593.1	6708.7	4901.9	0.1584	0.562	1	-0.186	0.6753	0.9694	0.0117	0.9618	0.9982
hsa-miR-132-3p	1	30	33	101	28	0	254	19	95	0	90	27	64	40	1	106	0	0	1	20.1	17.9	72.2	22	0	278.7	19.7	112.7	0	45.6	31	41.8	48.8	2.4	109.4	0	0	45.7	-0.7283	0.5635	1	-0.37	0.795	0.9694	-0.6095	0.5859	0.9982
hsa-miR-3615	251	498	405	408	141	534	507	235	106	49	545	346	431	420	42	318	132	138	255.4	334.4	219.1	291.6	111	576.7	556.3	244.3	125.8	77.9	276.2	396.9	281.6	512.5	101.9	328.2	134.3	122.3	274.8	-0.2965	0.5734	1	0.5426	0.44	0.9694	-0.0547	0.9072	0.9982
hsa-miR-487a-5p	0	0	8	0	0	0	0	24	0	25	0	0	0	0	0	107	0	0	0	0	4.3	0	0	0	0	24.9	0	39.7	0	0	0	0	0	110.4	0	0	3.8	-1.0592	0.5754	1	-0.0317	0.9865	1	-2.8431	0.1107	0.9982
hsa-miR-3196	0	0	8	0	0	0	0	0	0	0	0	0	0	0	0	0	0	0	0	0	4.3	0	0	0	0	0	0	0	0	0	0	0	0	0	0	0	0.2	-1.0592	0.5754	1				-0.7103	0.6912	0.9982
hsa-miR-371a-5p	0	0	8	0	0	0	0	0	0	0	0	0	0	0	0	0	0	0	0	0	4.3	0	0	0	0	0	0	0	0	0	0	0	0	0	0	0	0.2	-1.0592	0.5754	1				-0.7103	0.6912	0.9982
hsa-miR-214-3p	0	7	17	114	0	1	0	0	0	0	149	30	23	37	0	92	0	0	0	4.7	9.2	81.5	0	1.1	0	0	0	0	75.5	34.4	15	45.2	0	95	0	0	20.1	0.8311	0.5781	1	0.32	0.8549	0.9694	0.6285	0.6675	0.9982
hsa-miR-26a-2-3p	0	0	0	24	31	0	0	0	0	0	17	0	16	17	0	0	75	0	0	0	0	17.2	24.4	0	0	0	0	0	8.6	0	10.5	20.7	0	0	76.3	0	8.8	0.9704	0.5783	1	1.8318	0.3084	0.9694	1.2673	0.4355	0.9982
hsa-miR-3074-3p	0	0	0	0	0	0	0	0	0	0	0	0	0	3	0	0	0	0	0	0	0	0	0	0	0	0	0	0	0	0	0	3.7	0	0	0	0	0.2	1.0491	0.5796	1	0.8478	0.6557	0.9694	0.9127	0.6098	0.9982
hsa-miR-1224-5p	76	0	0	0	0	0	0	0	0	0	0	3	0	0	19	0	0	0	77.3	0	0	0	0	0	0	0	0	0	0	3.4	0	0	46.1	0	0	0	0.2	1.0491	0.5796	1	0.8478	0.6557	0.9694	0.9127	0.6098	0.9982
hsa-miR-301a-5p	0	0	0	7	0	0	0	0	0	0	0	13	0	0	0	0	0	0	0	0	0	5	0	0	0	0	0	0	0	14.9	0	0	0	0	0	0	0.3	1.0373	0.5803	1	2.0962	0.2684	0.9694	-0.7827	0.6615	0.9982
hsa-miR-382-3p	49	0	57	0	0	0	0	0	1	145	60	0	175	50	0	0	0	40	49.9	0	30.8	0	0	0	0	0	1.2	230.5	30.4	0	114.3	61	0	0	0	35.4	30.8	0.9809	0.5805	1	-0.779	0.6477	0.9694	-0.0338	0.9829	0.9982
hsa-miR-660-5p	0	156	132	195	13	203	44	63	121	0	108	150	131	40	54	246	0	215	0	104.7	71.4	139.4	10.2	219.2	48.3	65.5	143.6	0	54.7	172.1	85.6	48.8	131	253.9	0	190.5	96.6	0.5585	0.5809	1	0.8133	0.5062	0.9694	0.6439	0.4888	0.9982
hsa-let-7g-5p	40441	38272	56816	68437	87440	22663	56126	32282	41861	27678	67390	28032	35085	20374	20730	30378	52112	52811	41144.2	25696.3	30735.2	48912.8	68815.9	24476.2	61579.5	33553.6	49672.5	43993.7	34149.6	32157.9	22924.9	24863.4	50284	31354.5	53024.9	46802.1	40230.1	-0.2116	0.5818	1	-0.0881	0.8563	0.9694	-0.1706	0.5638	0.9982
hsa-miR-454-5p	17	43	26	81	0	0	0	32	45	0	80	5	0	21	0	45	0	166	17.3	28.9	14.1	57.9	0	0	0	33.3	53.4	0	40.5	5.7	0	25.6	0	46.4	0	147.1	26.1	0.7961	0.5887	1	0.0016	0.9992	1	0.4522	0.7218	0.9982
hsa-miR-539-5p	0	11	0	11	0	0	0	0	0	46	23	0	66	0	0	0	0	0	0	7.4	0	7.9	0	0	0	0	0	73.1	11.7	0	43.1	0	0	0	0	0	1.5	1.0018	0.5915	1	-1.0928	0.5592	0.9694	-2.1292	0.2172	0.9982
hsa-miR-6883-3p	0	0	0	6	0	0	0	0	0	0	6	0	0	0	0	0	0	0	0	0	0	4.3	0	0	0	0	0	0	3	0	0	0	0	0	0	0	0.4	-1.0022	0.5962	1	-1.2721	0.5028	0.9694	-1.0378	0.5615	0.9982
hsa-miR-4795-3p	0	0	0	6	0	0	0	0	0	0	0	0	0	0	0	0	0	0	0	0	0	4.3	0	0	0	0	0	0	0	0	0	0	0	0	0	0	0.2	-1.0022	0.5962	1				-0.6927	0.6985	0.9982
hsa-miR-665	0	0	0	6	0	0	0	0	0	0	0	0	0	0	0	0	0	0	0	0	0	4.3	0	0	0	0	0	0	0	0	0	0	0	0	0	0	0.2	-1.0022	0.5962	1				-0.6927	0.6985	0.9982
hsa-let-7d-3p	3329	6726	5602	4674	3903	2494	2159	3233	3204	2923	5216	2561	5506	2296	1694	5621	2987	2831	3386.9	4515.9	3030.5	3340.6	3071.7	2693.5	2368.8	3360.4	3801.9	4646.1	2643.2	2937.9	3597.7	2801.9	4109.1	5801.7	3039.3	2508.9	3425.3	0.1517	0.5966	1	-0.0148	0.9737	0.9977	0.0798	0.7301	0.9982
hsa-miR-4326	20	71	43	10	0	87	0	0	0	0	13	37	0	5	0	48	0	0	20.3	47.7	23.3	7.1	0	94	0	0	0	0	6.6	42.4	0	6.1	0	49.5	0	0	16.5	-0.767	0.5978	1	1.9589	0.2752	0.9694	-0.2963	0.8354	0.9982
hsa-miR-556-3p	0	0	22	3	0	0	0	0	0	6	25	0	10	0	0	0	0	0	0	0	11.9	2.1	0	0	0	0	0	9.5	12.7	0	6.5	0	0	0	0	0	2.4	0.9796	0.6037	1	-1.642	0.3759	0.9694	-1.2221	0.4601	0.9982
hsa-miR-369-5p	33	42	63	7	0	0	0	0	0	0	40	12	0	27	0	0	0	0	33.6	28.2	34.1	5	0	0	0	0	0	0	20.3	13.8	0	32.9	0	0	0	0	9.3	-0.8433	0.605	1	0.2287	0.9028	0.9713	-0.5478	0.7239	0.9982
hsa-miR-16-5p	30387	65938	137358	150935	63229	42225	57093	39774	36510	3407	129749	66079	75863	46126	39966	61080	81150	54600	30915.4	44271.6	74305.3	107875	49761.7	45603.3	62640.5	41340.8	43323	5415.4	65749.7	75804.9	49569.6	56289.8	96944.2	63043.4	82571.5	48387.6	57989.6	0.1852	0.6051	1	0.7585	0.2678	0.9694	0.3736	0.372	0.9982
hsa-miR-6511b-5p	0	4	0	2	0	0	0	0	0	0	0	0	0	0	0	0	0	0	0	2.7	0	1.4	0	0	0	0	0	0	0	0	0	0	0	0	0	0	0.2	-0.9724	0.6072	1				-0.6711	0.7075	0.9982
hsa-miR-92a-3p	86011	214050	138268	200711	131039	103273	111588	101839	117825	26704	155515	135472	151245	67183	61142	156430	116588	114142	87506.5	143716	74797.5	143451	103129	111536	122431	105851	139812	42445.6	78806.5	155412	98824.9	81986.7	148310	161458	118630	101155	112181	0.1464	0.6075	1	0.4263	0.4179	0.9694	0.2367	0.3949	0.9982
hsa-miR-410-3p	0	0	17	35	0	0	0	0	0	42	15	0	42	4	0	0	0	51	0	0	9.2	25	0	0	0	0	0	66.8	7.6	0	27.4	4.9	0	0	0	45.2	10.3	0.8831	0.6103	1	-0.4839	0.7801	0.9694	0.1315	0.9334	0.9982
hsa-miR-9985	0	1	4	1	7	6	0	2	0	2	2	0	13	2	1	2	6	1	0	0.7	2.2	0.7	5.5	6.5	0	2.1	0	3.2	1	0	8.5	2.4	2.4	2.1	6.1	0.9	2.5	0.5262	0.6117	1	1.0149	0.3964	0.9694	0.6987	0.4244	0.9982
hsa-miR-4686	0	0	7	0	0	0	0	0	0	0	0	0	0	0	0	0	0	0	0	0	3.8	0	0	0	0	0	0	0	0	0	0	0	0	0	0	0	0.2	-0.9575	0.6127	1				-0.6357	0.7222	0.9982
hsa-miR-6855-5p	0	0	7	0	0	0	0	0	0	0	0	0	0	0	0	0	0	0	0	0	3.8	0	0	0	0	0	0	0	0	0	0	0	0	0	0	0	0.2	-0.9575	0.6127	1				-0.6357	0.7222	0.9982
hsa-miR-93-5p	3425	5793	5833	9300	7127	2140	5199	4957	4536	1618	8307	4348	6771	3516	3192	2511	4378	7438	3484.6	3889.5	3155.4	6646.8	5609	2311.2	5704.2	5152.3	5382.4	2571.8	4209.5	4988	4424.2	4290.7	7742.7	2591.7	4454.7	6591.7	4622.2	0.1868	0.6143	1	0.2158	0.6787	0.9694	0.1948	0.5124	0.9982
hsa-miR-548e-3p	0	20	24	2	0	0	0	0	0	19	20	0	0	9	0	0	0	0	0	13.4	13	1.4	0	0	0	0	0	30.2	10.1	0	0	11	0	0	0	0	4.4	-0.9131	0.6145	1	-1.674	0.3686	0.9694	-1.4441	0.363	0.9982
hsa-miR-210-3p	0	80	33	101	0	0	0	26	0	0	40	29	24	13	0	0	0	0	0	53.7	17.9	72.2	0	0	0	27	0	0	20.3	33.3	15.7	15.9	0	0	0	0	14.2	-0.8294	0.6146	1	-0.2635	0.8765	0.9713	-0.7113	0.631	0.9982
hsa-miR-1249-3p	216	783	469	193	319	292	48	327	189	127	161	64	235	290	0	89	81	596	219.8	525.7	253.7	137.9	251.1	315.4	52.7	339.9	224.3	201.9	81.6	73.4	153.6	353.9	0	91.9	82.4	528.2	216	-0.4086	0.6176	1	-0.1689	0.8719	0.9708	-0.3541	0.5956	0.9982
hsa-miR-200c-3p	2	179	17	25	62	0	0	31	0	74	77	19	133	21	6	0	53	112	2	120.2	9.2	17.9	48.8	0	0	32.2	0	117.6	39	21.8	86.9	25.6	14.6	0	53.9	99.3	38.3	0.5764	0.6194	1	-0.0671	0.9562	0.9945	0.2708	0.7964	0.9982
hsa-miR-548ay-5p	0	2	5	13	0	0	0	0	0	8	25	0	2	0	0	0	0	5	0	1.3	2.7	9.3	0	0	0	0	0	12.7	12.7	0	1.3	0	0	0	0	4.4	2.5	-0.8327	0.6201	1	-2.0844	0.2283	0.9694	-1.5952	0.2708	0.9982
hsa-miR-486-5p	225747	534343	220937	399320	330772	239948	377647	171948	311447	49931	282661	223816	286736	144546	183353	383447	465581	305982	229672	358764	119518	285399	260320	259146	414341	178721	369565	79364.5	143237	256759	187356	176397	444753	395772	473737	271167	272444	0.1899	0.6204	1	0.6977	0.2608	0.9694	0.3576	0.3387	0.9982
hsa-let-7d-5p	11039	11151	3672	5744	7142	2843	5851	4121	5777	14132	8915	3850	9800	4921	3108	5680	6719	10124	11230.9	7486.9	1986.4	4105.3	5620.8	3070.5	6419.5	4283.3	6855	22462.6	4517.6	4416.7	6403.4	6005.3	7539	5862.6	6836.7	8972.1	6893	0.2054	0.6223	1	-0.4753	0.4405	0.9694	-0.1077	0.8047	0.9982
hsa-miR-204-5p	0	0	77	56	21	230	0	68	99	0	52	46	8	14	0	0	74	49	0	0	41.7	40	16.5	248.4	0	70.7	117.5	0	26.4	52.8	5.2	17.1	0	0	75.3	43.4	41.9	-0.687	0.6225	1	-0.7826	0.5673	0.9694	-0.7628	0.5323	0.9982
hsa-miR-885-3p	0	148	57	9	48	0	0	24	21	0	19	21	0	16	19	0	0	0	0	99.4	30.8	6.4	37.8	0	0	24.9	24.9	0	9.6	24.1	0	19.5	46.1	0	0	0	18	-0.7656	0.6248	1	-0.1751	0.9132	0.9767	-0.6235	0.6402	0.9982
hsa-miR-339-5p	0	51	37	54	49	168	57	0	0	13	86	32	160	60	0	0	0	0	0	34.2	20	38.6	38.6	181.4	62.5	0	0	20.7	43.6	36.7	104.5	73.2	0	0	0	0	36.3	-0.6586	0.6272	1	0.6542	0.7089	0.9694	-0.3243	0.8005	0.9982
hsa-miR-1228-3p	109	272	93	35	45	0	0	66	0	0	17	53	18	47	132	55	1	113	110.9	182.6	50.3	25	35.4	0	0	68.6	0	0	8.6	60.8	11.8	57.4	320.2	56.8	1	100.1	60.5	0.5337	0.6292	1	1.8368	0.1687	0.9694	0.8833	0.4222	0.9982
hsa-miR-5189-5p	0	0	0	7	0	0	0	0	25	0	11	0	0	11	0	0	0	0	0	0	0	5	0	0	0	0	29.7	0	5.6	0	0	13.4	0	0	0	0	3	0.9052	0.6296	1	-1.3746	0.4623	0.9694	-0.5676	0.7466	0.9982
hsa-miR-338-3p	0	32	29	56	0	0	0	94	1	0	46	1	43	6	0	0	0	0	0	21.5	15.7	40	0	0	0	97.7	1.2	0	23.3	1.1	28.1	7.3	0	0	0	0	13.1	-0.7871	0.6299	1	-1.983	0.2238	0.9694	-1.4309	0.3148	0.9982
hsa-miR-411-5p	58	57	177	29	0	0	0	0	7	100	133	0	10	66	0	0	25	8	59	38.3	95.8	20.7	0	0	0	0	8.3	158.9	67.4	0	6.5	80.5	0	0	25.4	7.1	31.6	-0.703	0.63	1	-1.3765	0.3705	0.9694	-1.0617	0.4116	0.9982
hsa-miR-598-3p	0	9	49	55	26	0	0	0	0	28	54	24	56	33	0	0	0	60	0	6	26.5	39.3	20.5	0	0	0	0	44.5	27.4	27.5	36.6	40.3	0	0	0	53.2	17.9	0.6748	0.6305	1	0.2895	0.8568	0.9694	0.5047	0.6982	0.9982
hsa-miR-3120-5p	0	0	15	16	0	0	0	0	0	16	11	0	0	6	0	0	0	0	0	0	8.1	11.4	0	0	0	0	0	25.4	5.6	0	0	7.3	0	0	0	0	3.2	-0.8973	0.6319	1	-1.8109	0.3294	0.9694	-1.4536	0.3817	0.9982
hsa-miR-26b-5p	10327	9689	14711	10799	10564	6186	4604	7017	7504	13401	17950	4424	10010	7326	2852	4026	3903	12712	10506.6	6505.3	7958.1	7718.2	8313.9	6680.9	5051.4	7293.4	8904.3	21300.7	9096.1	5075.2	6540.6	8940.3	6918	4155.4	3971.4	11265.6	8122	-0.162	0.6379	1	-0.7477	0.1902	0.9694	-0.4278	0.1998	0.9982
hsa-miR-19b-3p	5	244	423	231	155	121	1	55	178	68	272	115	265	82	34	0	419	262	5.1	163.8	228.8	165.1	122	130.7	1.1	57.2	211.2	108.1	137.8	131.9	173.2	100.1	82.5	0	426.3	232.2	137.6	0.4599	0.6403	1	0.352	0.7363	0.9694	0.4138	0.6078	0.9982
hsa-miR-6735-5p	26	25	0	11	0	0	0	0	0	0	15	11	0	0	43	0	0	0	26.5	16.8	0	7.9	0	0	0	0	0	0	7.6	12.6	0	0	104.3	0	0	0	9.8	0.8263	0.6407	1	1.7596	0.3476	0.9694	1.1621	0.4807	0.9982
hsa-miR-6885-5p	0	0	0	5	0	0	55	0	0	0	2	0	0	0	0	0	0	0	0	0	0	3.6	0	0	60.3	0	0	0	1	0	0	0	0	0	0	0	0.3	-0.8703	0.6455	1	-0.6115	0.7477	0.9694	-0.7349	0.6811	0.9982
hsa-miR-21-3p	57	9	54	60	26	77	26	94	34	0	40	26	39	52	92	0	0	45	58	6	29.2	42.9	20.5	83.2	28.5	97.7	40.3	0	20.3	29.8	25.5	63.5	223.2	0	0	39.9	44.9	0.4569	0.6478	1	0.3739	0.7915	0.9694	0.4504	0.6237	0.9982
hsa-miR-371b-5p	0	0	0	3	0	0	0	0	0	0	0	5	0	0	0	0	0	0	0	0	0	2.1	0	0	0	0	0	0	0	5.7	0	0	0	0	0	0	0.4	0.8463	0.654	1	1.3419	0.4798	0.9694	0.9264	0.6041	0.9982
hsa-miR-3912-3p	0	0	6	0	0	0	0	0	0	0	5	0	15	0	0	0	0	0	0	0	3.2	0	0	0	0	0	0	0	2.5	0	9.8	0	0	0	0	0	0.3	-0.8481	0.654	1	0.618	0.7436	0.9694	-0.8815	0.622	0.9982
hsa-miR-3940-3p	0	84	14	5	0	0	0	0	0	0	7	0	0	23	0	0	0	0	0	56.4	7.6	3.6	0	0	0	0	0	0	3.5	0	0	28.1	0	0	0	0	0.8	0.8193	0.6544	1	-1.3962	0.4618	0.9694	-1.6118	0.3667	0.9982
hsa-miR-4429	4	9	2	3	1	4	4	0	3	0	0	1	10	1	3	2	4	7	4.1	6	1.1	2.1	0.8	4.3	4.4	0	3.6	0	0	1.1	6.5	1.2	7.3	2.1	4.1	6.2	3.1	0.3275	0.6557	1	1.9824	0.1204	0.9694	0.7212	0.3498	0.9982
hsa-miR-106b-5p	480	718	866	1121	748	157	218	326	468	41	1200	700	922	440	104	521	819	197	488.3	482.1	468.5	801.2	588.7	169.6	239.2	338.8	555.3	65.2	608.1	803	602.4	537	252.3	537.7	833.3	174.6	474.7	0.2163	0.6558	1	0.4297	0.564	0.9694	0.2858	0.5338	0.9982
hsa-miR-1229-3p	29	240	26	35	0	0	155	27	1	129	50	0	28	25	28	96	0	483	29.5	161.1	14.1	25	0	0	170.1	28.1	1.2	205	25.3	0	18.3	30.5	67.9	99.1	0	428	72.4	0.5974	0.6569	1	0.4684	0.7409	0.9694	0.548	0.6355	0.9982
hsa-miR-151a-3p	2696	2699	2612	1385	1848	1379	967	811	1263	3833	2551	727	2800	2010	603	1910	1422	2502	2742.9	1812.1	1413	989.9	1454.4	1489.3	1061	842.9	1498.7	6092.5	1292.7	834	1829.5	2452.9	1462.7	1971.4	1446.9	2217.3	1828	0.1598	0.6577	1	-0.4184	0.5352	0.9694	-0.1063	0.8	0.9982
hsa-miR-503-5p	132	55	128	107	411	97	132	0	27	57	177	50	134	114	63	9	255	23	134.3	36.9	69.2	76.5	323.5	104.8	144.8	0	32	90.6	89.7	57.4	87.6	139.1	152.8	9.3	259.5	20.4	101.6	-0.3068	0.6585	1	0.9122	0.4062	0.9694	0.046	0.95	0.9982
hsa-miR-320a-3p	18046	46098	3738	10290	8652	11323	14311	12693	13644	14433	7972	15221	15624	7015	12472	12016	13946	19510	18359.8	30950.8	2022.1	7354.4	6809.2	12228.9	15701.5	13193	16190	22941	4039.8	17461.3	10208.9	8560.8	30252.9	12402.2	14190.3	17290.1	14453.2	0.2436	0.659	1	0.1913	0.762	0.9694	0.2076	0.6649	0.9982
hsa-miR-374c-5p	0	0	0	4	0	0	0	0	0	0	8	6	0	0	0	0	0	0	0	0	0	2.9	0	0	0	0	0	0	4.1	6.9	0	0	0	0	0	0	0.8	0.8265	0.6612	1	-0.0492	0.9792	0.9977	0.3774	0.8324	0.9982
hsa-miR-6766-3p	0	5	0	0	0	0	0	0	0	0	0	0	0	0	0	0	0	0	0	3.4	0	0	0	0	0	0	0	0	0	0	0	0	0	0	0	0	0.2	-0.8269	0.6621	1				-0.5634	0.7528	0.9982
hsa-miR-548ad-5p	0	2	5	15	0	0	1	0	123	0	3	0	30	0	0	0	252	5	0	1.3	2.7	10.7	0	0	1.1	0	146	0	1.5	0	19.6	0	0	0	256.4	4.4	2.4	0.6399	0.6637	1	-2.3678			0.9292	0.4734	0.9982
hsa-miR-4324	0	0	1	1	2	3	0	0	0	0	1	1	0	0	0	1	0	1	0	0	0.5	0.7	1.6	3.2	0	0	0	0	0.5	1.1	0	0	0	1	0	0.9	0.5	-0.6317	0.6667	1	0.47	0.8044	0.9694	-0.2579	0.8459	0.9982
hsa-miR-146b-5p	480	1013	1016	493	535	125	282	936	333	1252	1116	212	925	277	344	174	476	806	488.3	680.1	549.6	352.4	421	135	309.4	972.9	395.1	1990	565.5	243.2	604.4	338	834.4	179.6	484.3	714.3	569.9	0.2053	0.6671	1	-0.9463	0.1689	0.9694	-0.3545	0.469	0.9982
hsa-miR-1843	61	12	6	95	76	0	0	59	0	16	15	13	75	80	0	59	0	87	62.1	8.1	3.2	67.9	59.8	0	0	61.3	0	25.4	7.6	14.9	49	97.6	0	60.9	0	77.1	33.1	0.5271	0.6712	1	0.7418	0.5856	0.9694	0.6049	0.5825	0.9982
hsa-let-7b-3p	67	225	559	168	59	76	0	226	126	0	226	118	99	72	0	0	0	233	68.2	151.1	302.4	120.1	46.4	82.1	0	234.9	149.5	0	114.5	135.4	64.7	87.9	0	0	0	206.5	98	-0.5361	0.6714	1	-0.6491	0.6763	0.9694	-0.6301	0.5752	0.9982
hsa-miR-1323	0	69	62	0	0	59	0	5	0	0	1	0	0	0	0	0	332	0	0	46.3	33.5	0	0	63.7	0	5.2	0	0	0.5	0	0	0	0	0	337.8	0	8.5	0.7799	0.6754	1	-1.7628	0.352	0.9694	-3.3758	0.0343	0.9982
hsa-miR-424-5p	45	73	141	66	0	1	115	79	0	31	114	74	119	48	33	94	0	84	45.8	49	76.3	47.2	0	1.1	126.2	82.1	0	49.3	57.8	84.9	77.8	58.6	80	97	0	74.4	56	0.4182	0.6794	1	0.4562	0.6949	0.9694	0.441	0.6317	0.9982
hsa-miR-27a-5p	0	41	1	26	0	1	0	48	0	0	3	0	0	19	0	0	0	0	0	27.5	0.5	18.6	0	1.1	0	49.9	0	0	1.5	0	0	23.2	0	0	0	0	6.8	-0.7219	0.6806	1	-3.8882			-1.0693	0.497	0.9982
hsa-miR-181b-2-3p	0	0	0	0	0	0	0	0	0	0	0	0	0	2	0	0	0	0	0	0	0	0	0	0	0	0	0	0	0	0	0	2.4	0	0	0	0	0.1	0.7783	0.6811	1	0.5794	0.7606	0.9694	0.6643	0.7104	0.9982
hsa-miR-4510	0	0	0	0	0	0	0	0	0	1	0	0	0	1	1	0	0	0	0	0	0	0	0	0	0	0	0	1.6	0	0	0	1.2	2.4	0	0	0	0.3	0.7783	0.6811	1	0.1269	0.9468	0.9906	0.5139	0.7739	0.9982
hsa-miR-135b-5p	0	0	0	0	0	0	0	0	0	2	0	0	0	1	1	0	0	0	0	0	0	0	0	0	0	0	0	3.2	0	0	0	1.2	2.4	0	0	0	0.4	0.7783	0.6811	1	-0.3663	0.8471	0.9694	0.3635	0.839	0.9982
hsa-miR-22-5p	52	66	109	203	33	0	0	238	0	61	225	88	306	43	0	0	0	169	52.9	44.3	59	145.1	26	0	0	247.4	0	97	114	101	199.9	52.5	0	0	0	149.8	71.6	0.5651	0.6819	1	-0.5307	0.734	0.9694	0.0092	0.994	0.9997
hsa-miR-330-5p	0	0	21	7	0	0	0	0	109	22	10	0	0	8	0	0	0	28	0	0	11.4	5	0	0	0	0	129.3	35	5.1	0	0	9.8	0	0	0	24.8	5.2	0.7274	0.689	1	-2.2705	0.1822	0.9694	-0.0741	0.9615	0.9982
hsa-miR-200a-3p	0	45	71	28	0	0	0	32	46	1	33	0	0	33	2	0	0	0	0	30.2	38.4	20	0	0	0	33.3	54.6	1.6	16.7	0	0	40.3	4.9	0	0	0	13.3	-0.6986	0.6902	1	-1.5724	0.333	0.9694	-1.1824	0.4031	0.9982
hsa-miR-32-3p	0	0	21	33	0	0	0	0	0	6	10	0	23	0	0	0	0	0	0	0	11.4	23.6	0	0	0	0	0	9.5	5.1	0	15	0	0	0	0	0	3.6	-0.7394	0.6922	1	-0.4471	0.8117	0.9694	-0.713	0.6706	0.9982
hsa-miR-654-3p	358	74	51	54	0	229	0	65	68	313	92	0	452	92	2	0	0	23	364.2	49.7	27.6	38.6	0	247.3	0	67.6	80.7	497.5	46.6	0	295.3	112.3	4.9	0	0	20.4	102.9	-0.5864	0.6925	1	-1.1719	0.4361	0.9694	-0.9154	0.4577	0.9982
hsa-miR-29b-2-5p	0	22	25	3	1	0	0	0	0	0	9	17	25	8	0	0	0	2	0	14.8	13.5	2.1	0.8	0	0	0	0	0	4.6	19.5	16.3	9.8	0	0	0	1.8	4.6	0.543	0.694	1	1.8449	0.2616	0.9694	0.8794	0.5023	0.9982
hsa-miR-331-5p	29	0	41	24	0	0	0	0	0	0	5	9	6	20	0	0	0	0	29.5	0	22.2	17.2	0	0	0	0	0	0	2.5	10.3	3.9	24.4	0	0	0	0	6.1	-0.6347	0.6943	1	2.0319	0.2495	0.9694	-0.1798	0.9066	0.9982
hsa-miR-766-3p	62	30	9	4	0	0	0	14	25	24	43	0	29	30	0	96	0	0	63.1	20.1	4.9	2.9	0	0	0	14.6	29.7	38.1	21.8	0	18.9	36.6	0	99.1	0	0	19.4	0.6181	0.6952	1	-0.2033	0.8912	0.9713	0.276	0.8269	0.9982
hsa-miR-320e	17	15	15	18	0	0	0	0	0	2	11	12	10	8	0	0	1	1	17.3	10.1	8.1	12.9	0	0	0	0	0	3.2	5.6	13.8	6.5	9.8	0	0	1	0.9	4.9	-0.4861	0.6956	1	0.8827	0.5375	0.9694	-0.1632	0.8862	0.9982
hsa-miR-92b-3p	606	1052	289	689	365	79	511	623	750	312	481	618	519	197	233	321	981	234	616.5	706.3	156.3	492.4	287.3	85.3	560.7	647.5	890	495.9	243.7	709	339.1	240.4	565.2	331.3	998.2	207.4	476.3	0.2196	0.696	1	-0.1955	0.772	0.9694	0.0394	0.934	0.9982
hsa-miR-362-5p	0	0	0	6	0	0	0	0	0	0	6	1	21	0	0	0	0	0	0	0	0	4.3	0	0	0	0	0	0	3	1.1	13.7	0	0	0	0	0	0.5	-0.7334	0.6982	1	-1.0032	0.5971	0.9694	-0.7836	0.6611	0.9982
hsa-miR-4286	0	21	8	8	0	300	0	0	0	12	14	8	23	16	0	0	0	0	0	14.1	4.3	5.7	0	324	0	0	0	19.1	7.1	9.2	15	19.5	0	0	0	0	5.5	0.5572	0.7003	1	0.0038	0.9982	1	0.2907	0.8237	0.9982
hsa-miR-301b-3p	0	0	5	0	0	0	0	0	0	0	0	0	0	0	0	0	0	0	0	0	2.7	0	0	0	0	0	0	0	0	0	0	0	0	0	0	0	0.2	-0.7227	0.7026	1				-0.4706	0.7925	0.9982
hsa-miR-4746-5p	0	0	0	4	0	0	0	0	0	0	6	0	0	0	0	45	0	0	0	0	0	2.9	0	0	0	0	0	0	3	0	0	0	0	46.4	0	0	0.3	-0.7151	0.7056	1	-1.2721	0.5028	0.9694	-0.8888	0.6191	0.9982
hsa-miR-450a-1-3p	0	0	32	4	0	0	0	0	0	0	0	0	0	0	0	0	0	97	0	0	17.3	2.9	0	0	0	0	0	0	0	0	0	0	0	0	0	86	0.2	-0.7151	0.7056	1	0	1		-0.436	0.8074	0.9982
hsa-miR-3134	0	0	0	4	0	0	0	0	0	0	0	0	0	0	0	0	0	0	0	0	0	2.9	0	0	0	0	0	0	0	0	0	0	0	0	0	0	0.2	-0.7151	0.7056	1				-0.436	0.8074	0.9982
hsa-miR-548h-5p	0	0	0	4	0	0	0	0	0	0	0	0	0	0	0	0	0	0	0	0	0	2.9	0	0	0	0	0	0	0	0	0	0	0	0	0	0	0.2	-0.7151	0.7056	1				-0.436	0.8074	0.9982
hsa-miR-6812-5p	0	0	0	4	0	0	0	0	0	0	0	0	0	0	0	0	0	0	0	0	0	2.9	0	0	0	0	0	0	0	0	0	0	0	0	0	0	0.2	-0.7151	0.7056	1				-0.436	0.8074	0.9982
hsa-miR-933	0	0	0	4	0	0	0	0	0	0	0	0	0	0	0	0	0	0	0	0	0	2.9	0	0	0	0	0	0	0	0	0	0	0	0	0	0	0.2	-0.7151	0.7056	1				-0.436	0.8074	0.9982
hsa-miR-1180-3p	262	130	208	235	231	0	178	18	0	0	130	168	255	103	47	150	21	38	266.6	87.3	112.5	168	181.8	0	195.3	18.7	0	0	65.9	192.7	166.6	125.7	114	154.8	21.4	33.7	105.8	-0.3003	0.7085	1	2.1467	0.0662	0.9694	0.1977	0.8339	0.9982
hsa-miR-92b-5p	0	5	0	25	0	86	0	70	80	36	13	0	42	0	82	0	0	0	0	3.4	0	17.9	0	92.9	0	72.8	94.9	57.2	6.6	0	27.4	0	198.9	0	0	0	31.8	0.6708	0.711	1	-0.628	0.71	0.9694	0.0287	0.9848	0.9988
hsa-miR-493-5p	752	277	330	159	107	253	1	204	161	2128	297	46	1015	183	1	597	2	614	765.1	186	178.5	113.6	84.2	273.2	1.1	212	191	3382.4	150.5	52.8	663.2	223.3	2.4	616.2	2	544.1	424.5	0.3843	0.7133	1	-1.4695	0.2364	0.9694	-0.6845	0.481	0.9982
hsa-miR-511-5p	0	23	88	27	0	0	0	61	0	0	50	15	41	0	0	0	0	0	0	15.4	47.6	19.3	0	0	0	63.4	0	0	25.3	17.2	26.8	0	0	0	0	0	11.9	-0.6263	0.7177	1	-1.258	0.4851	0.9694	-0.9765	0.5296	0.9982
hsa-let-7e-5p	2104	2215	1162	704	2532	1201	574	1024	804	3638	1481	365	1966	767	189	2248	971	1302	2140.6	1487.2	628.6	503.2	1992.7	1297.1	629.8	1064.3	954	5782.5	750.5	418.7	1284.6	936	458.5	2320.3	988	1153.9	1377.2	-0.1883	0.718	1	-0.905	0.2396	0.9694	-0.5243	0.3173	0.9982
hsa-miR-3164	0	4	0	0	0	0	0	0	0	0	0	0	0	0	0	0	0	0	0	2.7	0	0	0	0	0	0	0	0	0	0	0	0	0	0	0	0	0.1	-0.6768	0.7207	1				-0.436	0.8074	0.9982
hsa-miR-24-1-5p	0	0	7	19	0	0	0	0	0	0	12	7	0	0	0	0	0	0	0	0	3.8	13.6	0	0	0	0	0	0	6.1	8	0	0	0	0	0	0	1.7	-0.6619	0.7238	1	-0.2753	0.8838	0.9713	-0.5665	0.7452	0.9982
hsa-let-7c-5p	1334	1475	2029	1024	3540	1169	2335	1512	2134	1397	3409	808	844	1188	623	2134	1317	1962	1357.2	990.3	1097.6	731.9	2786	1262.5	2561.9	1571.6	2532.2	2220.5	1727.5	926.9	551.5	1449.8	1511.2	2202.6	1340.1	1738.8	1586.7	-0.1584	0.7243	1	-0.5119	0.3344	0.9694	-0.2995	0.4007	0.9982
hsa-miR-134-5p	190	192	19	71	0	231	0	0	94	520	52	0	274	40	45	0	0	87	193.3	128.9	10.3	50.7	0	249.5	0	0	111.5	826.5	26.4	0	179	48.8	109.2	0	0	77.1	111.7	-0.4903	0.731	1	-1.5362	0.3398	0.9694	-1.0918	0.4035	0.9982
hsa-miR-424-3p	26	41	104	75	101	0	0	63	28	0	104	83	47	54	28	72	0	0	26.5	27.5	56.3	53.6	79.5	0	0	65.5	33.2	0	52.7	95.2	30.7	65.9	67.9	74.3	0	0	40.5	0.4138	0.7325	1	0.2664	0.8446	0.9694	0.3689	0.7282	0.9982
hsa-miR-139-3p	121	8	24	53	43	0	42	5	0	71	46	0	1	67	0	133	0	171	123.1	5.4	13	37.9	33.8	0	46.1	5.2	0	112.9	23.3	0	0.7	81.8	0	137.3	0	151.5	42.9	0.4497	0.7355	1	0.4858	0.7641	0.9694	0.4779	0.6883	0.9982
hsa-miR-642b-3p	0	0	1	4	2	0	0	2	0	0	4	2	0	0	0	0	0	0	0	0	0.5	2.9	1.6	0	0	2.1	0	0	2	2.3	0	0	0	0	0	0	0.6	-0.6232	0.7362	1	-0.9224	0.6264	0.9694	-0.9364	0.5319	0.9982
hsa-miR-338-5p	106	0	59	25	34	0	0	0	39	20	39	17	47	27	0	0	0	44	107.8	0	31.9	17.9	26.8	0	0	0	46.3	31.8	19.8	19.5	30.7	32.9	0	0	0	39	22.5	-0.4801	0.7379	1	-0.3704	0.798	0.9694	-0.4766	0.6988	0.9982
hsa-miR-186-5p	1953	1545	2748	2501	1253	1227	905	1154	2117	528	2365	1573	2930	1041	469	800	1069	823	1987	1037.3	1486.6	1787.5	986.1	1325.2	992.9	1199.5	2512	839.2	1198.5	1804.5	1914.5	1270.4	1137.6	825.7	1087.7	729.4	1340.1	-0.1165	0.742	1	-0.1806	0.7495	0.9694	-0.1544	0.6132	0.9982
hsa-miR-1306-5p	235	284	163	167	196	228	223	258	0	111	273	34	356	182	129	194	123	337	239.1	190.7	88.2	119.4	154.3	246.2	244.7	268.2	0	176.4	138.3	39	232.6	222.1	312.9	200.2	125.2	298.7	183.1	0.1551	0.7444	1	0.4537	0.6567	0.9694	0.261	0.6701	0.9982
hsa-miR-548d-5p	0	5	9	26	0	0	0	0	0	17	32	0	4	24	0	0	0	11	0	3.4	4.9	18.6	0	0	0	0	0	27	16.2	0	2.6	29.3	0	0	0	9.7	6.2	0.5169	0.7461	1	-0.5972	0.7246	0.9694	-0.0745	0.9587	0.9982
hsa-miR-28-3p	540	602	667	268	465	360	0	583	386	1284	718	207	866	287	2	334	178	125	549.4	404.2	360.8	191.5	366	388.8	0	606	458	2040.9	363.8	237.5	565.9	350.2	4.9	344.7	181.1	110.8	418	-0.2922	0.7475	1	-1.6124	0.0807	0.9694	-0.9693	0.2205	0.9982
hsa-miR-221-3p	2064	3178	1079	1084	1541	764	517	1981	976	3203	2445	883	4641	1069	221	1402	121	2055	2099.9	2133.7	583.7	774.7	1212.8	825.1	567.2	2059	1158.1	5091.1	1239	1013	3032.5	1304.6	536.1	1447.1	123.1	1821.2	1501.2	0.199	0.748	1	-0.781	0.3388	0.9694	-0.276	0.6215	0.9982
hsa-miR-99a-5p	429	661	2648	1002	841	240	3	697	378	66	1336	972	541	491	286	148	253	5	436.5	443.8	1432.5	716.1	661.9	259.2	3.3	724.5	448.5	104.9	677	1115.1	353.5	599.2	693.7	152.8	257.4	4.4	504.7	-0.2888	0.7484	1	-0.0969	0.9222	0.978	-0.2329	0.758	0.9982
hsa-miR-148a-3p	2817	3742	12047	4559	4159	4125	3848	3882	3854	2631	5908	3262	6863	3579	803	3297	3201	4340	2866	2512.4	6517	3258.4	3273.2	4455	4221.9	4034.9	4573.2	4181.9	2993.8	3742.1	4484.3	4367.6	1947.8	3403	3257.1	3846.2	3774.2	-0.1079	0.7493	1	-0.1198	0.7864	0.9694	-0.1229	0.6203	0.9982
hsa-miR-5010-5p	56	22	5	64	0	0	169	0	110	89	21	11	30	26	0	54	0	353	57	14.8	2.7	45.7	0	0	185.4	0	130.5	141.5	10.6	12.6	19.6	31.7	0	55.7	0	312.8	56.7	0.4292	0.7498	1	-0.1184	0.9361	0.9838	0.1847	0.8785	0.9982
hsa-miR-21-5p	42816	50817	103888	58091	35040	38525	18140	59270	27934	47211	80350	49953	101155	31839	11225	43420	24054	29196	43560.5	34119.1	56199.3	41518.4	27576.7	41607.3	19902.6	61604.7	33146.6	75041.1	40717	57305.4	66095.6	38854.7	27228.1	44815.7	24475.4	25874.1	42202.4	0.1213	0.7516	1	-0.3451	0.525	0.9694	-0.0859	0.7911	0.9982
hsa-miR-1228-5p	0	130	0	26	0	0	0	0	0	0	28	13	0	23	0	61	0	68	0	87.3	0	18.6	0	0	0	0	0	0	14.2	14.9	0	28.1	0	63	0	60.3	15.9	0.5264	0.7541	1	1.9192	0.2578	0.9694	0.8312	0.6007	0.9982
hsa-miR-505-5p	0	0	0	29	0	0	0	31	0	2	17	12	11	12	0	0	0	0	0	0	0	20.7	0	0	0	32.2	0	3.2	8.6	13.8	7.2	14.6	0	0	0	0	5.6	0.5662	0.756	1	-0.8785	0.5716	0.9694	-0.1592	0.9173	0.9982
hsa-miR-370-3p	361	165	150	47	0	0	1	26	120	99	100	15	442	167	0	24	213	60	367.3	110.8	81.1	33.6	0	0	1.1	27	142.4	157.4	50.7	17.2	288.8	203.8	0	24.8	216.7	53.2	98.7	0.3924	0.7567	1	0.3017	0.7849	0.9694	0.347	0.7396	0.9982
hsa-miR-675-3p	0	0	4	0	0	0	0	0	0	0	1	0	0	0	0	0	0	0	0	0	2.2	0	0	0	0	0	0	0	0.5	0	0	0	0	0	0	0	0.1	-0.5851	0.7573	1	-0.3184	0.867	0.9694	-0.4655	0.7947	0.9982
hsa-miR-5589-3p	0	0	4	0	0	0	0	0	0	0	0	0	0	0	0	0	0	0	0	0	2.2	0	0	0	0	0	0	0	0	0	0	0	0	0	0	0	0.1	-0.5851	0.7573	1				-0.3768	0.8331	0.9982
hsa-miR-484	543	2318	911	1419	542	328	854	698	674	268	2284	1027	1142	731	137	612	114	853	552.4	1556.3	492.8	1014.2	426.6	354.2	937	725.5	799.8	426	1157.4	1178.2	746.2	892.1	332.3	631.7	116	755.9	727.5	-0.1669	0.7598	1	-0.2173	0.755	0.9694	-0.2043	0.6421	0.9982
hsa-miR-129-5p	0	21	54	6	0	61	0	0	0	0	0	0	13	0	0	60	0	0	0	14.1	29.2	4.3	0	65.9	0	0	0	0	0	0	8.5	0	0	61.9	0	0	6.9	-0.5053	0.7608	1	3.2332	0.0868	0.9694	-1.9476	0.2266	0.9982
hsa-miR-199b-5p	0	62	33	32	21	422	0	0	44	0	115	11	27	0	0	46	0	3	0	41.6	17.9	22.9	16.5	455.8	0	0	52.2	0	58.3	12.6	17.6	0	0	47.5	0	2.7	41.4	-0.3851	0.761	1	-1.026	0.5237	0.9694	-2.0019	0.129	0.9982
hsa-miR-328-3p	400	942	243	101	17	0	33	206	71	95	496	55	250	184	150	0	53	143	407	632.5	131.5	72.2	13.4	0	36.2	214.1	84.2	151	251.3	63.1	163.4	224.5	363.8	0	53.9	126.7	166	-0.3357	0.7611	1	-0.2774	0.7907	0.9694	-0.3281	0.7161	0.9982
hsa-miR-4466	0	1	0	1	0	0	0	0	49	0	12	2	0	0	1	65	0	0	0	0.7	0	0.7	0	0	0	0	58.1	0	6.1	2.3	0	0	2.4	67.1	0	0	0.7	0.5685	0.7611	1	-3.3963			-0.2743	0.869	0.9982
hsa-miR-4755-5p	0	0	0	9	0	69	0	0	0	0	6	2	23	0	0	0	0	0	0	0	0	6.4	0	74.5	0	0	0	0	3	2.3	15	0	0	0	0	0	0.7	-0.5678	0.7633	1	-0.7081	0.7089	0.9694	-0.698	0.6959	0.9982
hsa-miR-651-5p	0	2	71	115	116	0	60	81	88	51	36	22	20	27	75	133	0	0	0	1.3	38.4	82.2	91.3	0	65.8	84.2	104.4	81.1	18.2	25.2	13.1	32.9	181.9	137.3	0	0	53.2	0.3955	0.7641	1	-0.3287	0.7973	0.9694	0.0995	0.9266	0.9982
hsa-miR-128-3p	1168	677	986	1124	1064	942	547	604	887	839	1032	604	1225	515	270	576	468	1320	1188.3	454.5	533.4	803.3	837.4	1017.4	600.1	627.8	1052.5	1333.6	523	692.9	800.4	628.5	654.9	594.5	476.2	1169.8	777.1	-0.1029	0.7666	1	-0.2681	0.5984	0.9694	-0.1839	0.5359	0.9982
hsa-miR-155-5p	143	635	393	308	248	467	318	432	189	627	548	178	410	172	130	1	585	190	145.5	426.3	212.6	220.1	195.2	504.4	348.9	449	224.3	996.6	277.7	204.2	267.9	209.9	315.3	1	595.2	168.4	320.1	-0.2135	0.7688	1	-0.8358	0.3934	0.9694	-0.5144	0.4087	0.9982
hsa-miR-99b-3p	0	46	6	9	36	0	0	0	0	28	16	5	0	0	0	0	0	43	0	30.9	3.2	6.4	28.3	0	0	0	0	44.5	8.1	5.7	0	0	0	0	0	38.1	9.2	-0.4743	0.7712	1	-0.6634	0.715	0.9694	-0.6376	0.6646	0.9982
hsa-miR-505-3p	263	528	461	279	181	196	49	291	136	110	449	183	288	157	64	331	0	176	267.6	354.5	249.4	199.4	142.4	211.7	53.8	302.5	161.4	174.8	227.5	209.9	188.2	191.6	155.2	341.6	0	156	199.3	-0.2206	0.7727	1	-0.2736	0.7809	0.9694	-0.2568	0.6699	0.9982
hsa-miR-374a-3p	106	11	54	59	15	25	0	33	94	73	115	23	21	73	18	0	1	0	107.8	7.4	29.2	42.2	11.8	27	0	34.3	111.5	116	58.3	26.4	13.7	89.1	43.7	0	1	0	40	-0.3351	0.7738	1	-1.4517	0.2532	0.9694	-0.9252	0.3363	0.9982
hsa-miR-182-5p	1193	735	3289	5566	7610	1320	4797	1665	4122	445	3946	2446	1872	1252	1384	2006	4913	2358	1213.7	493.5	1779.2	3978.1	5989.1	1425.6	5263.1	1730.6	4891.2	707.3	1999.6	2806	1223.2	1527.9	3357.1	2070.5	4999.1	2089.7	2641.4	-0.1681	0.7746	1	0.1561	0.8223	0.9694	-0.0523	0.919	0.9982
hsa-miR-135a-5p	0	25	0	26	0	0	70	25	0	0	4	0	16	0	25	0	0	0	0	16.8	0	18.6	0	0	76.8	26	0	0	2	0	10.5	0	60.6	0	0	0	11.7	-0.5071	0.7747	1	0.3194	0.8614	0.9694	-0.2506	0.8749	0.9982
hsa-miR-487b-5p	0	4	0	0	0	0	0	0	0	0	0	0	7	0	0	0	0	0	0	2.7	0	0	0	0	0	0	0	0	0	0	4.6	0	0	0	0	0	0.4	0.5375	0.776	1	1.1904	0.531	0.9694	0.6683	0.7084	0.9982
hsa-miR-30d-5p	8481	12719	10543	8764	10017	10570	5479	7506	7130	12049	13677	5093	14567	6457	2447	7094	6472	9308	8628.5	8539.7	5703.3	6263.7	7883.4	11415.7	6011.4	7801.7	8460.5	19151.7	6930.8	5842.6	9518.2	7879.8	5935.6	7322	6585.4	8248.9	8229.1	-0.0736	0.779	1	-0.4897	0.3109	0.9694	-0.2612	0.3447	0.9982
hsa-miR-486-3p	1100	1882	954	1795	1678	759	2300	856	1294	1100	1408	1381	1099	716	745	1803	1563	1349	1119.1	1263.6	516.1	1282.9	1320.6	819.7	2523.5	889.7	1535.5	1748.4	713.5	1584.3	718.1	873.8	1807.1	1861	1590.4	1195.5	1297.9	0.1169	0.7802	1	0.1947	0.7158	0.9694	0.1388	0.6876	0.9982
hsa-miR-190a-5p	0	0	0	28	0	0	0	0	42	15	7	1	0	0	0	0	0	0	0	0	0	20	0	0	0	0	49.8	23.8	3.5	1.1	0	0	0	0	0	0	5.5	0.5252	0.7815	1	-4.8032	0.003	0.9155	-3.3911	0.0406	0.9982
hsa-miR-4714-5p	0	0	0	0	0	0	0	0	0	0	0	1	0	0	0	0	0	0	0	0	0	0	0	0	0	0	0	0	0	1.1	0	0	0	0	0	0	0.1	0.5252	0.7815	1	0.3371	0.8593	0.9694	0.4279	0.8109	0.9982
hsa-miR-378b	0	0	0	0	0	0	0	0	0	0	0	0	0	1	0	0	0	0	0	0	0	0	0	0	0	0	0	0	0	0	0	1.2	0	0	0	0	0.1	0.5252	0.7815	1	0.3371	0.8593	0.9694	0.4279	0.8109	0.9982
hsa-miR-3960	0	0	0	0	0	0	0	0	0	0	0	0	0	1	0	0	0	0	0	0	0	0	0	0	0	0	0	0	0	0	0	1.2	0	0	0	0	0.1	0.5252	0.7815	1	0.3371	0.8593	0.9694	0.4279	0.8109	0.9982
hsa-miR-203b-3p	0	0	0	0	0	0	0	0	0	0	0	0	0	0	1	0	0	0	0	0	0	0	0	0	0	0	0	0	0	0	0	0	2.4	0	0	0	0.1	0.5252	0.7815	1	0.3371	0.8593	0.9694	0.4279	0.8109	0.9982
hsa-miR-6884-5p	0	0	0	0	0	0	0	1	0	0	0	1	38	0	0	0	0	0	0	0	0	0	0	0	0	1	0	0	0	1.1	24.8	0	0	0	0	0	0.1	0.5252	0.7815	1	-0.1077	0.9548	0.9945	0.2775	0.8767	0.9982
hsa-miR-642a-3p	0	12	28	40	96	0	0	32	0	0	18	50	17	18	0	0	0	95	0	8.1	15.1	28.6	75.6	0	0	33.3	0	0	9.1	57.4	11.1	22	0	0	0	84.2	19.1	0.4003	0.7825	1	0.9508	0.5557	0.9694	0.5825	0.6606	0.9982
hsa-miR-380-3p	0	12	37	0	0	0	0	0	0	0	2	0	24	0	0	0	0	0	0	8.1	20	0	0	0	0	0	0	0	1	0	15.7	0	0	0	0	0	0.5	-0.5149	0.7828	1	-0.6115	0.7477	0.9694	-1.2062	0.4997	0.9982
hsa-miR-369-3p	211	197	270	92	141	0	0	117	1	553	107	18	955	38	1	181	0	1	214.7	132.3	146.1	65.8	111	0	0	121.6	1.2	879	54.2	20.6	624	46.4	2.4	186.8	0	0.9	144.8	0.3644	0.784	1	-0.8544	0.5585	0.9694	-0.2768	0.8157	0.9982
hsa-miR-25-3p	13174	20064	22277	26825	21333	13884	24182	13126	23669	2902	23514	20369	23833	10076	6328	18948	22186	16197	13403.1	13471.2	12051	19172.2	16789.2	14994.8	26531.7	13643.1	28085.8	4612.7	11915.6	23367	15572.7	12296.2	15349.6	19557.1	22574.6	14354.1	16541.2	0.0824	0.7864	1	0.273	0.6499	0.9694	0.1457	0.6568	0.9982
hsa-miR-130b-5p	435	393	409	106	181	65	57	124	1	668	362	39	466	171	110	197	85	356	442.6	263.9	221.3	75.8	142.4	70.2	62.5	128.9	1.2	1061.8	183.4	44.7	304.5	208.7	266.8	203.3	86.5	315.5	226.9	0.1611	0.7871	1	-0.646	0.5365	0.9694	-0.2292	0.7496	0.9982
hsa-miR-345-5p	200	102	364	186	152	0	0	22	258	33	259	106	146	90	0	123	95	0	203.5	68.5	196.9	132.9	119.6	0	0	22.9	306.1	52.5	131.2	121.6	95.4	109.8	0	127	96.7	0	99.1	-0.3358	0.7878	1	-0.6134	0.6189	0.9694	-0.4664	0.6496	0.9982
hsa-miR-144-5p	130	187	1549	1868	1318	724	652	542	641	170	1716	546	750	431	226	662	777	914	132.3	125.6	837.9	1335.1	1037.3	781.9	715.4	563.4	760.6	270.2	869.6	626.4	490.1	526	548.2	683.3	790.6	810	661.3	-0.1454	0.7879	1	0.0526	0.9193	0.978	-0.0783	0.8608	0.9982
hsa-miR-125a-5p	2637	5477	3741	2620	2426	2370	1434	2436	1409	931	4978	1543	1933	2500	2039	2292	2256	2029	2682.9	3677.3	2023.7	1872.5	1909.3	2559.6	1573.3	2532	1671.9	1479.8	2522.6	1770.1	1263	3050.9	4945.9	2365.7	2295.5	1798.1	2333	0.1004	0.7884	1	0.2795	0.6192	0.9694	0.1635	0.5938	0.9982
hsa-miR-616-5p	0	0	0	3	0	0	0	0	0	0	4	0	19	0	0	0	0	0	0	0	0	2.1	0	0	0	0	0	0	2	0	12.4	0	0	0	0	0	0.2	-0.505	0.7897	1	-0.9918	0.6016	0.9694	-0.6841	0.702	0.9982
hsa-miR-6813-5p	0	0	0	3	0	0	0	26	0	0	0	0	25	0	0	0	0	0	0	0	0	2.1	0	0	0	27	0	0	0	0	16.3	0	0	0	0	0	0.1	-0.505	0.7897	1	-3.2617			-0.2629	0.8831	0.9982
hsa-miR-6871-5p	3	0	0	0	0	0	0	0	0	0	0	0	0	0	0	0	0	0	3.1	0	0	0	0	0	0	0	0	0	0	0	0	0	0	0	0	0	0.2	-0.505	0.7897	1				-0.2629	0.8831	0.9982
hsa-miR-3680-5p	0	3	0	0	0	0	0	0	0	0	0	0	0	0	0	0	0	0	0	2	0	0	0	0	0	0	0	0	0	0	0	0	0	0	0	0	0.1	-0.505	0.7897	1				-0.2629	0.8831	0.9982
hsa-miR-6826-3p	0	0	0	3	0	0	0	0	0	0	0	0	0	0	0	0	0	0	0	0	0	2.1	0	0	0	0	0	0	0	0	0	0	0	0	0	0	0.1	-0.505	0.7897	1				-0.2629	0.8831	0.9982
hsa-miR-221-5p	76	43	44	35	0	57	0	0	84	185	77	17	128	67	2	35	0	42	77.3	28.9	23.8	25	0	61.6	0	0	99.7	294.1	39	19.5	83.6	81.8	4.9	36.1	0	37.2	50.7	0.2874	0.7944	1	-1.2864	0.3159	0.9694	-0.5839	0.5827	0.9982
hsa-miR-143-5p	0	0	0	16	0	465	0	1	0	0	1	1	2	0	0	0	2	3	0	0	0	11.4	0	502.2	0	1	0	0	0.5	1.1	1.3	0	0	0	2	2.7	1.1	-0.4471	0.7948	1	0.9772	0.539	0.9694	-0.142	0.9233	0.9982
hsa-miR-671-3p	0	26	14	8	0	0	0	0	0	84	29	0	25	24	0	0	0	0	0	17.5	7.6	5.7	0	0	0	0	0	133.5	14.7	0	16.3	29.3	0	0	0	0	12.5	0.442	0.7964	1	-1.6447	0.3654	0.9694	-0.9648	0.5423	0.9982
hsa-miR-4685-3p	0	83	45	72	69	0	152	0	0	0	35	22	60	47	41	60	1	0	0	55.7	24.3	51.5	54.3	0	166.8	0	0	0	17.7	25.2	39.2	57.4	99.5	61.9	1	0	36.4	-0.3	0.7975	1	2.5099	0.0904	0.9694	0.2313	0.8506	0.9982
hsa-miR-5003-3p	0	0	9	0	0	0	0	0	0	16	0	0	0	7	0	0	0	0	0	0	4.9	0	0	0	0	0	0	25.4	0	0	0	8.5	0	0	0	0	0.7	0.4723	0.8016	1	-1.4153	0.451	0.9694	0.8149	0.6478	0.9982
hsa-miR-181a-2-3p	71	86	189	37	44	0	0	90	0	248	122	100	104	22	0	0	0	0	72.2	57.7	102.2	26.4	34.6	0	0	93.5	0	394.2	61.8	114.7	68	26.8	0	0	0	0	58.5	-0.3681	0.8022	1	-1.6085	0.3357	0.9694	-1.1384	0.3862	0.9982
hsa-miR-3163	0	0	0	12	0	0	0	0	0	0	4	4	0	0	0	0	0	0	0	0	0	8.6	0	0	0	0	0	0	2	4.6	0	0	0	0	0	0	0.8	-0.4702	0.8025	1	0.1739	0.9269	0.9786	-0.2781	0.8761	0.9982
hsa-miR-548l	0	24	0	27	64	131	152	0	0	27	5	22	0	0	92	41	0	0	0	16.1	0	19.3	50.4	141.5	166.8	0	0	42.9	2.5	25.2	0	0	223.2	42.3	0	0	40.6	-0.3833	0.804	1	1.2946	0.4687	0.9694	0.0416	0.977	0.9982
hsa-miR-576-5p	13	91	223	86	24	68	0	19	0	0	107	61	97	68	0	0	0	60	13.2	61.1	120.6	61.5	18.9	73.4	0	19.7	0	0	54.2	70	63.4	83	0	0	0	53.2	38.5	-0.3003	0.8045	1	0.7904	0.627	0.9694	0.0023	0.9984	0.9997
hsa-miR-877-5p	169	173	152	131	0	199	0	159	114	197	100	107	244	40	122	103	101	0	171.9	116.2	82.2	93.6	0	214.9	0	165.3	135.3	313.1	50.7	122.7	159.4	48.8	295.9	106.3	102.8	0	121.1	0.2817	0.805	1	-0.4111	0.6923	0.9694	-0.0304	0.9741	0.9982
hsa-miR-1343-3p	0	45	14	0	0	0	0	0	0	0	10	0	0	4	62	0	0	0	0	30.2	7.6	0	0	0	0	0	0	0	5.1	0	0	4.9	150.4	0	0	0	1	-0.4617	0.806	1	-0.5306	0.7787	0.9694	-0.4706	0.7876	0.9982
hsa-miR-145-3p	0	0	186	93	165	1	0	37	30	13	68	58	58	0	0	0	0	116	0	0	100.6	66.5	129.9	1.1	0	38.5	35.6	20.7	34.5	66.5	37.9	0	0	0	0	102.8	35.2	-0.3881	0.8117	1	-0.0874	0.9534	0.9945	-0.3289	0.8022	0.9982
hsa-miR-671-5p	0	94	3	6	0	0	0	5	12	7	0	0	0	8	0	0	0	93	0	63.1	1.6	4.3	0	0	0	5.2	14.2	11.1	0	0	0	9.8	0	0	0	82.4	2.8	0.4051	0.8122	1	-1.4901	0.3632	0.9694	-0.7851	0.5697	0.9982
hsa-miR-133b	0	0	0	4	0	0	0	0	0	0	0	0	1	0	0	0	0	0	0	0	0	2.9	0	0	0	0	0	0	0	0	0.7	0	0	0	0	0	0.2	-0.4461	0.8137	1	0.3371	0.8593	0.9694	-0.2073	0.9077	0.9982
hsa-miR-183-5p	517	523	1488	2254	3857	430	2588	345	3025	62	1499	759	828	608	1142	294	4321	1632	526	351.1	804.9	1611	3035.5	464.4	2839.5	358.6	3589.5	98.5	759.6	870.7	541	742	2770.1	303.5	4396.7	1446.3	1417.2	0.1637	0.8161	1	0.3916	0.6906	0.9694	0.2589	0.7019	0.9982
hsa-miR-203a-3p	30	1	32	37	47	283	147	35	640	2	123	93	7	129	2	129	215	62	30.5	0.7	17.3	26.4	37	305.6	161.3	36.4	759.4	3.2	62.3	106.7	4.6	157.4	4.9	133.1	218.8	54.9	117.8	0.2218	0.8178	1	-1.0026	0.3957	0.9694	-0.3977	0.6679	0.9982
hsa-miR-874-3p	0	0	3	0	0	0	62	25	0	0	6	0	0	0	0	0	0	0	0	0	1.6	0	0	0	68	26	0	0	3	0	0	0	0	0	0	0	1.7	-0.4361	0.8179	1	-3.3346	0.077	0.9694	-2.2169	0.214	0.9982
hsa-miR-208b-3p	0	0	3	0	0	0	0	0	0	0	0	0	0	0	0	0	0	0	0	0	1.6	0	0	0	0	0	0	0	0	0	0	0	0	0	0	0	0.1	-0.4361	0.8179	1				-0.2629	0.8831	0.9982
hsa-miR-513a-3p	0	0	3	0	0	0	0	0	0	0	0	0	0	0	0	0	0	0	0	0	1.6	0	0	0	0	0	0	0	0	0	0	0	0	0	0	0	0.1	-0.4361	0.8179	1				-0.2629	0.8831	0.9982
hsa-miR-23a-3p	8082	11894	17300	9515	8476	9260	3402	7116	3269	6720	18452	4012	12888	9767	2450	6730	3930	8647	8222.5	7985.8	9358.6	6800.5	6670.7	10000.9	3732.6	7396.3	3879	10681.3	9350.5	4602.5	8421.1	11919.2	5942.9	6946.3	3998.8	7663.1	7420.7	-0.0814	0.8197	1	-0.1297	0.8122	0.9694	-0.1116	0.7122	0.9982
hsa-miR-628-5p	0	0	19	27	0	0	0	0	0	0	31	0	62	3	0	0	0	0	0	0	10.3	19.3	0	0	0	0	0	0	15.7	0	40.5	3.7	0	0	0	0	5	0.4146	0.8211	1	-1.7691			0.4178	0.8054	0.9982
hsa-miR-96-5p	74	92	139	390	313	92	225	226	32	1	213	216	240	73	21	129	451	67	75.3	61.8	75.2	278.7	246.3	99.4	246.9	234.9	38	1.6	107.9	247.8	156.8	89.1	50.9	133.1	458.9	59.4	147.9	0.138	0.8217	1	0.7798	0.4324	0.9694	0.3471	0.5928	0.9982
hsa-miR-6734-5p	108	43	0	33	94	0	0	47	74	0	11	12	71	0	16	17	69	0	109.9	28.9	0	23.6	74	0	0	48.9	87.8	0	5.6	13.8	46.4	0	38.8	17.5	70.2	0	31.4	-0.3002	0.8248	1	-0.3429	0.8038	0.9694	-0.3214	0.7884	0.9982
hsa-let-7f-5p	63152	53054	65846	45566	99386	48214	51267	31873	43166	135144	78430	26594	54920	32684	22213	63129	52828	110231	64250.1	35621.1	35620.1	32566.6	78217.5	52071.5	56248.4	33128.5	51221	214809	39744	30508.3	35885.2	39885.9	53881.3	65158.2	53753.4	97688.9	59458.8	0.0842	0.8249	1	-0.5866	0.3961	0.9694	-0.2248	0.6048	0.9982
hsa-miR-421	137	71	135	100	84	1	56	135	215	44	142	15	139	34	27	156	95	49	139.4	47.7	73	71.5	66.1	1.1	61.4	140.3	255.1	69.9	72	17.2	90.8	41.5	65.5	161	96.7	43.4	84.1	0.1532	0.8256	1	-0.8344	0.2542	0.9694	-0.2877	0.6343	0.9982
hsa-miR-590-3p	0	27	53	41	71	0	0	0	0	58	61	0	126	10	1	0	0	0	0	18.1	28.7	29.3	55.9	0	0	0	0	92.2	30.9	0	82.3	12.2	2.4	0	0	0	19.6	-0.33	0.8342	1	-0.7843	0.6577	0.9694	-0.5876	0.6848	0.9982
hsa-miR-760	0	75	0	5	0	82	0	29	0	47	29	29	23	15	35	0	0	33	0	50.4	0	3.6	0	88.6	0	30.1	0	74.7	14.7	33.3	15	18.3	84.9	0	0	29.2	24.6	0.3046	0.8375	1	-0.1467	0.914	0.9767	0.096	0.9406	0.9982
hsa-miR-548ax	0	0	0	29	42	0	0	0	0	17	3	11	0	19	0	0	0	0	0	0	0	20.7	33.1	0	0	0	0	27	1.5	12.6	0	23.2	0	0	0	0	6.6	-0.3757	0.8379	1	-0.2437	0.8932	0.9713	-0.3883	0.8126	0.9982
hsa-miR-4511	0	9	0	5	0	0	0	0	0	11	6	12	0	0	0	0	0	0	0	6	0	3.6	0	0	0	0	0	17.5	3	13.8	0	0	0	0	0	0	2.4	0.3816	0.8385	1	-0.7905	0.6735	0.9694	-0.3188	0.849	0.9982
hsa-miR-1307-3p	62	169	7	52	0	0	0	12	0	107	64	7	179	35	0	0	0	118	63.1	113.5	3.8	37.2	0	0	0	12.5	0	170.1	32.4	8	117	42.7	0	0	0	104.6	39.2	0.3041	0.8401	1	-0.3231	0.8363	0.9694	-0.01	0.994	0.9997
hsa-miR-342-3p	345	1621	1591	833	524	520	561	901	218	277	1203	611	517	357	465	326	987	929	351	1088.4	860.7	595.4	412.4	561.6	615.5	936.5	258.7	440.3	609.6	700.9	337.8	435.7	1127.9	336.5	1004.3	823.3	638.7	0.0851	0.8423	1	0.2815	0.6606	0.9694	0.1512	0.6853	0.9982
hsa-miR-411-3p	0	21	56	0	0	0	0	22	0	23	62	0	35	6	0	0	0	0	0	14.1	30.3	0	0	0	0	22.9	0	36.6	31.4	0	22.9	7.3	0	0	0	0	9.2	-0.3593	0.8442	1	-1.815	0.2727	0.9694	-1.1342	0.4606	0.9982
hsa-miR-493-3p	211	0	38	0	0	0	0	0	0	43	20	0	59	0	0	0	0	135	214.7	0	20.6	0	0	0	0	0	0	68.3	10.1	0	38.6	0	0	0	0	119.6	26.2	-0.3576	0.8477	1	0.1763	0.9239	0.9781	-0.2221	0.8962	0.9982
hsa-miR-548ae-5p	0	2	5	4	0	0	0	0	0	0	4	0	0	0	0	0	0	5	0	1.3	2.7	2.9	0	0	0	0	0	0	2	0	0	0	0	0	0	4.4	0.7	-0.3464	0.8496	1	0.1533	0.9356	0.9838	-0.195	0.9048	0.9982
hsa-miR-942-5p	96	139	338	134	90	0	0	31	0	41	135	47	214	88	0	49	0	328	97.7	93.3	182.8	95.8	70.8	0	0	32.2	0	65.2	68.4	53.9	139.8	107.4	0	50.6	0	290.7	74.9	0.2366	0.8511	1	0.9774	0.4836	0.9694	0.4609	0.6799	0.9982
hsa-miR-1226-3p	0	124	16	6	4	0	0	0	0	0	49	45	0	4	0	8	0	0	0	83.3	8.7	4.3	3.1	0	0	0	0	0	24.8	51.6	0	4.9	0	8.3	0	0	3.2	-0.2483	0.86	1	0.3622			-0.6891	0.619	0.9982
hsa-miR-15a-5p	531	972	2414	2685	1559	611	685	1107	784	127	2687	1911	1773	922	163	1157	1198	209	540.2	652.6	1305.9	1919	1226.9	659.9	751.6	1150.6	930.3	201.9	1361.6	2192.3	1158.5	1125.2	395.4	1194.2	1219	185.2	1009.5	0.0961	0.8613	1	0.2171	0.7824	0.9694	0.1311	0.7851	0.9982
hsa-miR-425-3p	70	105	55	51	22	106	0	150	0	0	146	79	277	48	1	50	0	0	71.2	70.5	29.8	36.5	17.3	114.5	0	155.9	0	0	74	90.6	181	58.6	2.4	51.6	0	0	53	0.2043	0.8614	1	-0.0727	0.9637	0.9963	0.076	0.9473	0.9982
hsa-miR-584-5p	896	474	277	364	227	34	30	379	144	2855	644	142	1071	265	19	364	128	343	911.6	318.2	149.8	260.2	178.7	36.7	32.9	393.9	170.9	4538	326.3	162.9	699.8	323.4	46.1	375.7	130.2	304	282.2	0.1299	0.8621	1	-2.0175			0.0787	0.8967	0.9982
hsa-miR-144-3p	870	1402	4825	6703	2459	1285	1469	1016	1964	11	5465	2681	1995	1769	1111	1121	2064	876	885.1	941.3	2610.1	4790.7	1935.2	1387.8	1611.7	1056	2330.5	17.5	2769.4	3075.6	1303.6	2158.8	2694.9	1157	2100.2	776.3	1866.8	-0.0866	0.8624	1	0.2739	0.7674	0.9694	0.0346	0.9539	0.9982
hsa-miR-185-5p	1413	1660	1241	2730	1616	535	2041	1269	1566	653	2104	1368	2392	870	420	1095	858	1762	1437.6	1114.5	671.3	1951.2	1271.8	577.8	2239.3	1319	1858.2	1037.9	1066.2	1569.4	1563	1061.7	1018.8	1130.2	873	1561.5	1295.7	-0.0683	0.8641	1	-0.0606	0.8942	0.9713	-0.0756	0.8062	0.9982
hsa-miR-106b-3p	1127	1410	1061	1775	1063	620	794	1085	2233	492	1466	648	1496	801	243	934	1248	1103	1146.6	946.7	574	1268.6	836.6	669.6	871.1	1127.7	2649.7	782	742.9	743.4	977.5	977.5	589.4	964	1269.9	977.5	1006.4	0.0492	0.8665	1	-0.4856	0.3905	0.9694	-0.1833	0.5745	0.9982
hsa-miR-130a-3p	163	88	200	170	214	445	58	5	0	30	208	104	128	75	51	156	321	207	165.8	59.1	108.2	121.5	168.4	480.6	63.6	5.2	0	47.7	105.4	119.3	83.6	91.5	123.7	161	326.6	183.4	134.2	-0.0911	0.8682	1	1.8211	0.0759	0.9694	0.3532	0.6296	0.9982
hsa-miR-374a-5p	200	509	868	661	1050	742	619	243	387	163	1047	279	291	450	564	3	764	347	203.5	341.7	469.6	472.4	826.4	801.4	679.1	252.6	459.2	259.1	530.6	320.1	190.1	549.2	1368.1	3.1	777.4	307.5	489.5	-0.1241	0.8696	1	0.4017	0.6824	0.9694	0.0578	0.9262	0.9982
hsa-miR-494-3p	401	71	145	37	53	81	0	20	50	262	100	43	500	31	0	124	0	276	408	47.7	78.4	26.4	41.7	87.5	0	20.8	59.3	416.4	50.7	49.3	326.7	37.8	0	128	0	244.6	112.4	0.1927	0.8716	1	-0.2042	0.877	0.9713	0.0015	0.9988	0.9997
hsa-miR-487b-3p	233	190	340	90	61	331	0	181	1	794	255	38	914	107	20	75	75	152	237.1	127.6	183.9	64.3	48	357.5	0	188.1	1.2	1262	129.2	43.6	597.2	130.6	48.5	77.4	76.3	134.7	206	0.1436	0.872	1	-1.1487	0.3065	0.9694	-0.5368	0.5511	0.9982
hsa-miR-543	57	224	219	42	144	141	0	104	141	381	94	7	297	92	65	50	0	194	58	150.4	118.5	30	113.3	152.3	0	108.1	167.3	605.6	47.6	8	194.1	112.3	157.7	51.6	0	171.9	124.8	0.1606	0.8739	1	-1.0691	0.3438	0.9694	-0.472	0.5918	0.9982
hsa-miR-127-3p	95	177	106	50	71	325	0	82	0	654	37	2	433	53	1	177	0	80	96.7	118.8	57.3	35.7	55.9	351	0	85.2	0	1039.5	18.7	2.3	282.9	64.7	2.4	182.7	0	70.9	136.9	-0.1818	0.8743	1	-1.3824	0.3493	0.9694	-0.8573	0.4462	0.9982
hsa-miR-377-3p	0	22	0	3	0	0	0	0	0	0	5	0	4	0	0	0	0	0	0	14.8	0	2.1	0	0	0	0	0	0	2.5	0	2.6	0	0	0	0	0	0.4	0.2971	0.8752	1	-0.3543	0.8519	0.9694	0.002	0.9991	0.9997
hsa-miR-190b-5p	0	18	0	8	0	0	0	0	0	17	11	0	35	0	0	0	0	0	0	12.1	0	5.7	0	0	0	0	0	27	5.6	0	22.9	0	0	0	0	0	4.1	0.2813	0.8803	1	-0.7893	0.6735	0.9694	-0.3142	0.8524	0.9982
hsa-miR-28-5p	167	406	542	233	484	423	35	121	114	490	405	124	589	221	79	62	445	187	169.9	272.6	293.2	166.5	380.9	456.8	38.4	125.8	135.3	778.8	205.2	142.3	384.9	269.7	191.6	64	452.8	165.7	260.8	-0.082	0.8859	1	-0.311	0.6858	0.9694	-0.1976	0.7062	0.9982
hsa-miR-1260b	0	28	2	26	0	1	0	31	0	36	43	3	20	11	1	0	0	0	0	18.8	1.1	18.6	0	1.1	0	32.2	0	57.2	21.8	3.4	13.1	13.4	2.4	0	0	0	10.2	-0.202	0.8867	1	-2.1423	0.1315	0.9694	-1.3376	0.2838	0.9982
hsa-miR-26a-5p	32312	35744	34426	18613	22891	21549	7315	16746	10886	27188	45244	6490	36352	23782	6892	15412	12380	29390	32873.8	23999	18623.1	13302.9	18015.4	23273.1	8025.8	17405.7	12917.4	43214.9	22927.2	7445.2	23752.7	29022.4	16717.7	15907.4	12596.9	26046	20337	-0.0609	0.8867	1	-0.3259	0.5881	0.9694	-0.1811	0.6273	0.9982
hsa-miR-29c-5p	0	0	7	13	0	0	0	0	0	0	4	0	0	8	0	0	0	0	0	0	3.8	9.3	0	0	0	0	0	0	2	0	0	9.8	0	0	0	0	1.4	-0.266	0.8871	1	0.7791	0.6804	0.9694	0.0007	0.9997	0.9997
hsa-miR-3679-5p	0	0	0	3	0	0	0	6	0	62	2	0	17	1	0	0	0	0	0	0	0	2.1	0	0	0	6.2	0	98.5	1	0	11.1	1.2	0	0	0	0	0.6	-0.2663	0.8882	1	-2.858			-1.0465	0.549	0.9982
hsa-miR-92a-1-5p	0	0	46	11	0	0	0	42	0	1	3	21	0	0	0	0	0	0	0	0	24.9	7.9	0	0	0	43.7	0	1.6	1.5	24.1	0	0	0	0	0	0	4.4	-0.2603	0.8891	1	-4.1921			-3.6708	0.0255	0.9982
hsa-miR-4440	33	0	0	0	0	0	0	0	0	0	0	13	0	8	0	0	0	0	33.6	0	0	0	0	0	0	0	0	0	0	14.9	0	9.8	0	0	0	0	3.2	-0.2603	0.8891	1	2.5108	0.1845	0.9694	0.1255	0.9437	0.9982
hsa-let-7f-1-3p	0	0	6	12	0	0	0	0	133	0	10	0	13	0	0	0	0	0	0	0	3.2	8.6	0	0	0	0	157.8	0	5.1	0	8.5	0	0	0	0	0	1	-0.2564	0.8912	1	-3.2762			-1.6711	0.3339	0.9982
hsa-miR-4446-3p	162	776	60	59	40	0	0	158	116	686	89	13	246	146	0	139	0	190	164.8	521	32.5	42.2	31.5	0	0	164.2	137.6	1090.4	45.1	14.9	160.7	178.2	0	143.5	0	168.4	160.8	-0.1821	0.8914	1	-1.6227	0.214	0.9694	-0.9662	0.398	0.9982
hsa-miR-361-5p	332	592	596	351	176	82	52	275	155	80	463	227	458	181	8	65	565	273	337.8	397.5	322.4	250.9	138.5	88.6	57.1	285.8	183.9	127.2	234.6	260.4	299.3	220.9	19.4	67.1	574.9	241.9	228.2	0.0885	0.8939	1	0.2217	0.7864	0.9694	0.1246	0.8164	0.9982
hsa-let-7a-5p	130221	109315	92739	81246	194083	96241	102201	61524	101036	220567	122822	48343	96973	59889	51151	115446	119474	174055	132485	73395.4	50168.1	58067.5	152745	103941	112132	63947.5	119890	350588	62239.4	55458.4	63363	73085.5	124075	119157	121567	154251	110586	0.0522	0.8956	1	-0.4928	0.4592	0.9694	-0.1931	0.648	0.9982
hsa-miR-142-5p	396	458	842	836	601	780	505	493	473	2	915	480	665	515	236	805	581	171	402.9	307.5	455.5	597.5	473	842.4	554.1	512.4	561.3	3.2	463.7	550.6	434.5	628.5	572.5	830.9	591.2	151.5	496.3	0.0522	0.8975	1	0.4395	0.6333	0.9694	0.1866	0.7377	0.9982
hsa-miR-323b-3p	223	155	56	35	27	0	0	61	0	306	12	5	373	23	1	0	67	0	226.9	104.1	30.3	25	21.2	0	0	63.4	0	486.4	6.1	5.7	243.7	28.1	2.4	0	68.2	0	72.9	-0.1725	0.8995	1	-1.1251	0.4723	0.9694	-0.6964	0.5811	0.9982
hsa-miR-222-3p	1752	2787	1439	866	958	705	820	854	734	5010	2199	443	2536	1285	316	669	260	1812	1782.5	1871.2	778.4	618.9	754	761.4	899.7	887.6	871	7963.3	1114.3	508.2	1657	1568.1	766.5	690.5	264.6	1605.8	1409.1	-0.0644	0.8999	1	-1.3033	0.1177	0.9694	-0.7027	0.2227	0.9982
hsa-miR-335-3p	144	330	315	48	0	0	145	79	70	350	406	4	341	200	0	58	74	48	146.5	221.6	170.4	34.3	0	0	159.1	82.1	83.1	556.3	205.7	4.6	222.8	244.1	0	59.9	75.3	42.5	128.2	-0.1495	0.9002	1	-1.1582	0.3047	0.9694	-0.6412	0.5208	0.9982
hsa-miR-3619-3p	0	0	0	2	0	0	0	0	0	0	8	0	0	0	0	0	0	0	0	0	0	1.4	0	0	0	0	0	0	4.1	0	0	0	0	0	0	0	0.3	-0.2341	0.9016	1	-1.5071	0.4268	0.9694	-0.8477	0.6354	0.9982
hsa-miR-6833-3p	0	0	0	2	21	0	0	0	0	0	6	0	0	0	0	0	0	0	0	0	0	1.4	16.5	0	0	0	0	0	3	0	0	0	0	0	0	0	0.2	-0.2341	0.9016	1	-1.2721	0.5028	0.9694	-0.7266	0.6845	0.9982
hsa-miR-3135a	0	1	1	17	0	0	0	0	1	0	0	0	77	0	0	0	0	0	0	0.7	0.5	12.2	0	0	0	0	1.2	0	0	0	50.3	0	0	0	0	0	0.1	-0.2341	0.9016	1	-0.332	0.8614	0.9694	-0.2629	0.8831	0.9982
hsa-miR-5683	0	0	2	0	0	0	0	0	0	0	1	0	0	0	0	0	0	0	0	0	1.1	0	0	0	0	0	0	0	0.5	0	0	0	0	0	0	0	0.1	-0.2341	0.9016	1	-0.3184	0.867	0.9694	-0.2569	0.8858	0.9982
hsa-miR-455-5p	0	0	2	0	0	319	0	0	0	0	0	0	0	0	0	0	0	0	0	0	1.1	0	0	344.5	0	0	0	0	0	0	0	0	0	0	0	0	0.1	-0.2341	0.9016	1				-0.1092	0.9513	0.9982
hsa-miR-1298-3p	0	0	0	2	0	0	0	0	0	0	0	0	0	0	0	0	0	0	0	0	0	1.4	0	0	0	0	0	0	0	0	0	0	0	0	0	0	0.1	-0.2341	0.9016	1				-0.1092	0.9513	0.9982
hsa-miR-215-3p	0	0	0	2	0	0	0	0	0	0	0	0	0	0	0	0	0	0	0	0	0	1.4	0	0	0	0	0	0	0	0	0	0	0	0	0	0	0.1	-0.2341	0.9016	1				-0.1092	0.9513	0.9982
hsa-miR-3685	0	0	0	2	0	0	0	0	0	0	0	0	0	0	0	0	0	0	0	0	0	1.4	0	0	0	0	0	0	0	0	0	0	0	0	0	0	0.1	-0.2341	0.9016	1				-0.1092	0.9513	0.9982
hsa-miR-382-5p	954	419	672	160	46	218	0	329	256	2663	274	38	1585	80	43	271	206	437	970.6	281.3	363.5	114.4	36.2	235.4	0	342	303.8	4232.8	138.8	43.6	1035.7	97.6	104.3	279.7	209.6	387.3	287.8	0.1187	0.9019	1	-1.8182			0.1586	0.8395	0.9982
hsa-miR-433-3p	179	125	52	43	0	0	0	0	28	283	34	23	276	12	0	49	0	0	182.1	83.9	28.1	30.7	0	0	0	0	33.2	449.8	17.2	26.4	180.3	14.6	0	50.6	0	0	61	-0.1774	0.9067	1	-2.3557			-0.7816	0.5665	0.9982
hsa-miR-29c-3p	162	479	893	646	394	607	437	282	219	36	545	427	411	108	9	405	1571	142	164.8	321.6	483.1	461.7	310.1	655.6	479.5	293.1	259.9	57.2	276.2	489.8	268.6	131.8	21.8	418	1598.5	125.8	378.7	0.0782	0.9126	1	0.9268	0.3379	0.9694	0.3411	0.5808	0.9982
hsa-miR-340-3p	413	229	562	142	88	148	0	103	365	287	521	44	276	225	38	183	103	268	420.2	153.8	304	101.5	69.3	159.8	0	107.1	433.1	456.2	264	50.5	180.3	274.6	92.2	188.9	104.8	237.5	199.9	-0.0871	0.914	1	-0.9115	0.177	0.9694	-0.4585	0.4976	0.9982
hsa-miR-6803-3p	530	948	506	296	305	603	419	118	148	53	242	207	153	319	298	285	920	530	539.2	636.5	273.7	211.6	240	651.2	459.7	122.6	175.6	84.2	122.6	237.5	100	389.3	722.8	294.2	936.1	469.7	370.4	0.0553	0.9153	1	1.7864	0.0105	0.9694	0.4815	0.3537	0.9982
hsa-miR-323a-3p	274	44	78	9	0	156	79	32	0	365	59	31	549	15	0	118	0	0	278.8	29.5	42.2	6.4	0	168.5	86.7	33.3	0	580.2	29.9	35.6	358.7	18.3	0	121.8	0	0	99.4	-0.1433	0.9156	1	-0.7916	0.628	0.9694	-0.4984	0.6878	0.9982
hsa-miR-148b-5p	0	23	7	49	54	0	0	0	90	0	47	0	18	0	0	0	101	0	0	15.4	3.8	35	42.5	0	0	0	106.8	0	23.8	0	11.8	0	0	0	102.8	0	19	0.1664	0.9206	1	-0.6169	0.7382	0.9694	-0.2569	0.8663	0.9982
hsa-miR-193b-5p	0	108	90	6	0	0	244	0	0	1	15	30	0	10	0	0	383	36	0	72.5	48.7	4.3	0	0	267.7	0	0	1.6	7.6	34.4	0	12.2	0	0	389.7	31.9	13.1	0.1573	0.9208	1	1.8589	0.2367	0.9694	-0.0412	0.9756	0.9982
hsa-let-7b-5p	141014	111085	77997	101343	217539	74409	219945	102430	209466	75343	92312	67724	102960	45691	91575	90580	134154	172950	143466	74583.8	42193.3	72431.1	171205	80362.3	241316	106465	248554	119756	46778.7	77692.1	67275	55759	222130	93491.6	136504	153272	119624	-0.0494	0.9215	1	-0.1524	0.8177	0.9694	-0.0874	0.842	0.9982
hsa-miR-378a-3p	71	325	372	262	89	89	71	120	98	13	180	186	243	127	33	247	1	103	72.2	218.2	201.2	187.3	70	96.1	77.9	124.7	116.3	20.7	91.2	213.4	158.8	155	80	254.9	1	91.3	123.9	0.0696	0.9219	1	0.5744	0.5462	0.9694	0.2259	0.7078	0.9982
hsa-miR-329-3p	238	149	347	48	99	184	0	133	1	205	103	0	596	42	0	124	0	203	242.1	100	187.7	34.3	77.9	198.7	0	138.2	1.2	325.8	52.2	0	389.4	51.3	0	128	0	179.9	117	-0.1236	0.924	1	-0.2016	0.8943	0.9713	-0.1835	0.8695	0.9982
hsa-miR-664a-5p	25	22	85	12	0	108	51	12	54	133	67	21	76	40	72	0	0	0	25.4	14.8	46	8.6	0	116.6	56	12.5	64.1	211.4	34	24.1	49.7	48.8	174.6	0	0	0	49.2	0.1191	0.9255	1	-0.7368	0.6078	0.9694	-0.3074	0.7733	0.9982
hsa-miR-9-3p	0	0	5	0	0	0	65	0	0	0	8	0	0	0	1	0	1	0	0	0	2.7	0	0	0	71.3	0	0	0	4.1	0	0	0	2.4	0	1	0	0.6	-0.1702	0.9283	1	-0.9436	0.6185	0.9694	-0.5111	0.7698	0.9982
hsa-miR-517a-3p	0	14	0	0	16	0	0	0	0	0	2	0	0	0	8	0	0	0	0	9.4	0	0	12.6	0	0	0	0	0	1	0	0	0	19.4	0	0	0	2.4	-0.168	0.9283	1	1.6986	0.369	0.9694	0.2213	0.8998	0.9982
hsa-miR-517b-3p	0	14	0	0	16	0	0	0	0	0	2	0	0	0	8	0	0	0	0	9.4	0	0	12.6	0	0	0	0	0	1	0	0	0	19.4	0	0	0	2.4	-0.168	0.9283	1	1.6986	0.369	0.9694	0.2213	0.8998	0.9982
hsa-miR-502-3p	49	144	136	218	134	79	84	0	92	6	163	152	115	41	36	90	202	0	49.9	96.7	73.6	155.8	105.5	85.3	92.2	0	109.2	9.5	82.6	174.4	75.1	50	87.3	92.9	205.5	0	85.9	0.0601	0.935	1	0.8479	0.5019	0.9694	0.307	0.6966	0.9982
hsa-miR-487a-3p	0	43	10	5	0	0	1	0	0	0	13	0	35	16	0	0	0	0	0	28.9	5.4	3.6	0	0	1.1	0	0	0	6.6	0	22.9	19.5	0	0	0	0	4.9	0.1308	0.936	1	1.0812	0.564	0.9694	0.4204	0.7829	0.9982
hsa-let-7a-3p	0	72	66	63	0	91	0	30	0	49	88	17	72	13	0	47	0	81	0	48.3	35.7	45	0	98.3	0	31.2	0	77.9	44.6	19.5	47	15.9	0	48.5	0	71.8	32.4	-0.1042	0.9373	1	-0.3355	0.8	0.9694	-0.2246	0.846	0.9982
hsa-miR-199a-3p	2149	1743	1975	1409	2076	2093	435	2521	1325	2669	3926	1087	5341	1715	221	849	173	1748	2186.4	1170.3	1068.4	1007	1633.8	2260.5	477.3	2620.3	1572.3	4242.3	1989.5	1247	3489.9	2092.9	536.1	876.3	176	1549.1	1677.5	0.0476	0.9375	1	-0.8133	0.2978	0.9694	-0.3608	0.487	0.9982
hsa-miR-6798-3p	12	34	0	0	0	0	0	0	0	0	0	0	8	0	0	0	0	27	12.2	22.8	0	0	0	0	0	0	0	0	0	0	5.2	0	0	0	0	23.9	3.6	-0.1433	0.9375	1	2.6387	0.1631	0.9694	0.2415	0.8909	0.9982
hsa-miR-199b-3p	1074	871	987	705	1038	1047	218	1261	662	1335	1963	543	2671	857	110	424	87	874	1092.7	584.8	533.9	503.9	816.9	1130.8	239.2	1310.7	785.5	2122	994.7	622.9	1745.3	1045.8	266.8	437.6	88.5	774.6	838.7	0.0472	0.938	1	-0.8138	0.2976	0.9694	-0.361	0.4866	0.9982
hsa-miR-379-5p	760	437	595	46	214	615	0	173	156	1751	334	0	1408	197	117	436	0	568	773.2	293.4	321.9	32.9	168.4	664.2	0	179.8	185.1	2783.2	169.3	0	920	240.4	283.8	450	0	503.4	442.7	0.096	0.9383	1	-1.0446	0.4498	0.9694	-0.508	0.6377	0.9982
hsa-miR-26a-1-3p	0	0	13	12	0	0	0	0	0	0	13	0	0	11	0	0	0	0	0	0	7	8.6	0	0	0	0	0	0	6.6	0	0	13.4	0	0	0	0	2	-0.1424	0.9393	1	0.0976	0.9586	0.9947	-0.0567	0.9741	0.9982
hsa-miR-1185-1-3p	40	0	0	0	0	0	0	0	0	25	7	0	12	22	0	0	0	0	40.7	0	0	0	0	0	0	0	0	39.7	3.5	0	7.8	26.8	0	0	0	0	6.6	-0.1402	0.9401	1	-0.7012	0.6981	0.9694	-0.4033	0.8141	0.9982
hsa-miR-4662a-5p	0	0	15	12	0	0	0	42	0	0	6	0	0	16	0	0	0	0	0	0	8.1	8.6	0	0	0	43.7	0	0	3	0	0	19.5	0	0	0	0	4.6	0.1403	0.9402	1	-1.2944			-0.6991	0.6801	0.9982
hsa-miR-432-5p	2204	1645	447	403	119	53	0	792	413	6231	289	47	2889	148	116	471	0	935	2242.3	1104.5	241.8	288	93.7	57.2	0	823.2	490.1	9904.1	146.4	53.9	1887.7	180.6	281.4	486.1	0	828.6	534.6	-0.0779	0.9482	1	-2.065			-0.0137	0.989	0.9997
hsa-miR-625-3p	63	423	192	52	103	118	264	0	0	223	254	56	183	119	130	251	128	0	64.1	284	103.9	37.2	81.1	127.4	289.7	0	0	354.5	128.7	64.2	119.6	145.2	315.3	259.1	130.2	0	139.1	0.0509	0.9507	1	0.2699	0.8527	0.9694	0.1321	0.8904	0.9982
hsa-miR-99b-5p	210	795	483	211	463	402	210	271	277	196	570	104	336	156	91	148	292	1042	213.7	533.8	261.3	150.8	364.4	434.2	230.4	281.7	328.7	311.5	288.8	119.3	219.5	190.4	220.7	152.8	297.1	923.4	306.8	-0.0318	0.9527	1	0.0216	0.9753	0.9977	-0.0252	0.9522	0.9982
hsa-miR-6772-3p	14	0	0	0	0	0	0	0	0	7	19	0	17	0	0	110	0	0	14.2	0	0	0	0	0	0	0	0	11.1	9.6	0	11.1	0	0	113.5	0	0	2.6	-0.1072	0.9543	1	-1.0092	0.5687	0.9694	-0.5713	0.7339	0.9982
hsa-miR-1908-5p	22	144	28	54	0	0	58	18	0	112	39	16	1	44	0	0	0	198	22.4	96.7	15.1	38.6	0	0	63.6	18.7	0	178	19.8	18.4	0.7	53.7	0	0	0	175.5	39	0.0799	0.9552	1	-0.4104	0.7996	0.9694	-0.1821	0.8855	0.9982
hsa-miR-342-5p	249	275	53	32	257	0	67	95	25	81	136	118	83	12	37	101	282	63	253.3	184.6	28.7	22.9	202.3	0	73.5	98.7	29.7	128.7	68.9	135.4	54.2	14.6	89.7	104.2	286.9	55.8	101.8	-0.0497	0.9552	1	0.396	0.6242	0.9694	0.0899	0.902	0.9982
hsa-miR-6881-3p	0	37	0	9	40	0	0	0	0	0	5	0	0	0	24	0	0	0	0	24.8	0	6.4	31.5	0	0	0	0	0	2.5	0	0	0	58.2	0	0	0	3.6	-0.1033	0.9555	1	-1.1361	0.5497	0.9694	-3.2302	0.0595	0.9982
hsa-miR-499a-5p	204	74	105	58	91	0	0	26	0	0	70	48	17	26	106	0	0	115	207.5	49.7	56.8	41.5	71.6	0	0	27	0	0	35.5	55.1	11.1	31.7	257.1	0	0	101.9	52.6	0.0713	0.9561	1	1.6037	0.2984	0.9694	0.4751	0.7001	0.9982
hsa-miR-6769b-3p	0	17	0	6	0	0	0	0	0	0	0	0	0	14	0	0	0	0	0	11.4	0	4.3	0	0	0	0	0	0	0	0	0	17.1	0	0	0	0	0.9	0.0972	0.9585	1	2.1967	0.246	0.9694	-1.6624	0.3518	0.9982
hsa-miR-1270	0	0	2	6	27	0	142	0	0	19	21	10	0	0	15	122	0	0	0	0	1.1	4.3	21.2	0	155.8	0	0	30.2	10.6	11.5	0	0	36.4	125.9	0	0	22.1	-0.0855	0.9588	1	0.8944	0.611	0.9694	0.2269	0.8798	0.9982
hsa-miR-30b-3p	46	0	10	19	0	0	0	0	72	19	20	0	38	0	0	0	0	51	46.8	0	5.4	13.6	0	0	0	0	85.4	30.2	10.1	0	24.8	0	0	0	0	45.2	14.5	0.0867	0.9605	1	-1.1891	0.4889	0.9694	-0.6136	0.6829	0.9982
hsa-miR-146a-3p	0	0	9	12	0	0	0	0	0	0	32	0	0	10	0	0	0	0	0	0	4.9	8.6	0	0	0	0	0	0	16.2	0	0	12.2	0	0	0	0	2.3	-0.0898	0.9617	1	-0.784			-0.4005	0.8188	0.9982
hsa-miR-431-5p	556	423	325	96	69	0	0	121	2	172	156	30	651	197	0	292	0	213	565.7	284	175.8	68.6	54.3	0	0	125.8	2.4	273.4	79.1	34.4	425.4	240.4	0	301.4	0	188.8	156.6	0.0635	0.9622	1	0.4454	0.7429	0.9694	0.1781	0.8755	0.9982
hsa-miR-6852-3p	0	0	12	0	0	0	0	0	0	1	0	0	0	6	0	0	0	0	0	0	6.5	0	0	0	0	0	0	1.6	0	0	0	7.3	0	0	0	0	0.9	0.0837	0.9645	1	0.9936	0.6002	0.9694	0.308	0.8628	0.9982
hsa-miR-30e-3p	648	504	782	405	667	141	422	478	258	988	789	191	677	401	227	304	620	215	659.3	338.4	423	289.5	524.9	152.3	463	496.8	306.1	1570.4	399.8	219.1	442.4	489.4	550.6	313.8	630.9	190.5	470	-0.0192	0.9646	1	-0.707	0.2886	0.9694	-0.33	0.4497	0.9982
hsa-miR-9-5p	2	39	9	52	0	235	0	0	0	72	18	2	168	4	0	0	0	240	2	26.2	4.9	37.2	0	253.8	0	0	0	114.4	9.1	2.3	109.8	4.9	0	0	0	212.7	43.2	0.0647	0.9658	1	0.4912	0.776	0.9694	0.1743	0.9013	0.9982
hsa-miR-19a-3p	0	15	277	73	0	0	0	19	1	28	89	54	51	23	1	0	0	108	0	10.1	149.8	52.2	0	0	0	19.7	1.2	44.5	45.1	61.9	33.3	28.1	2.4	0	0	95.7	30.2	0.0631	0.9669	1	0.1943	0.8832	0.9713	0.0941	0.9403	0.9982
hsa-miR-18a-3p	41	87	79	173	9	76	81	0	101	0	148	40	88	18	11	291	0	0	41.7	58.4	42.7	123.6	7.1	82.1	88.9	0	119.8	0	75	45.9	57.5	22	26.7	300.4	0	0	60.7	0.0389	0.9702	1	0.2814	0.8587	0.9694	0.1391	0.895	0.9982
hsa-miR-574-5p	163	203	276	111	303	676	244	110	160	337	226	148	251	158	0	726	415	24	165.8	136.3	149.3	79.3	238.5	730.1	267.7	114.3	189.9	535.7	114.5	169.8	164	192.8	0	749.3	422.3	21.3	246.7	-0.0315	0.9714	1	0.0685	0.951	0.9935	-0.0084	0.9909	0.9997
hsa-miR-148b-3p	2495	1782	1878	1252	1142	1033	694	910	976	2247	2687	948	2824	1329	118	1504	649	1548	2538.4	1196.5	1015.9	894.8	898.8	1115.6	761.4	945.8	1158.1	3571.6	1361.6	1087.5	1845.2	1621.8	286.2	1552.3	660.4	1371.9	1326.9	0.017	0.9718	1	-0.4985	0.4626	0.9694	-0.2195	0.6078	0.9982
hsa-miR-485-5p	261	115	140	34	0	0	0	16	1	863	90	4	146	37	0	61	0	238	265.5	77.2	75.7	24.3	0	0	0	16.6	1.2	1371.7	45.6	4.6	95.4	45.2	0	63	0	210.9	53.4	-0.05	0.9721	1	-2.081			0.245	0.8385	0.9982
hsa-miR-151b	36	232	343	376	104	72	162	68	29	58	342	236	121	118	14	386	4	64	36.6	155.8	185.5	268.7	81.8	77.8	177.7	70.7	34.4	92.2	173.3	270.7	79.1	144	34	398.4	4.1	56.7	130.1	0.0242	0.9745	1	0.5516	0.5683	0.9694	0.1888	0.7673	0.9982
hsa-miR-10a-5p	1321	1387	4050	2243	3068	2651	2425	2024	1079	1292	2194	2380	1790	997	952	2493	2326	1736	1344	931.2	2190.9	1603.1	2414.5	2863.1	2660.6	2103.7	1280.3	2053.6	1111.8	2730.3	1169.6	1216.7	2309.2	2573.1	2366.7	1538.5	1914.5	-0.0119	0.9752	1	0.2946	0.5666	0.9694	0.0872	0.7794	0.9982
hsa-miR-1468-5p	0	30	26	30	36	0	0	23	0	0	16	20	16	43	0	0	0	0	0	20.1	14.1	21.4	28.3	0	0	23.9	0	0	8.1	22.9	10.5	52.5	0	0	0	0	11.2	0.0466	0.9754	1	0.4506	0.7922	0.9694	0.1786	0.8957	0.9982
hsa-miR-223-5p	222	165	430	326	96	241	147	239	73	136	339	80	179	133	89	240	43	484	225.9	110.8	232.6	233	75.6	260.3	161.3	248.4	86.6	216.2	171.8	91.8	117	162.3	215.9	247.7	43.8	428.9	185	0.0158	0.976	1	0.0506	0.9431	0.9897	0.0223	0.9587	0.9982
hsa-miR-4508	0	16	0	17	0	77	0	21	0	0	50	23	1	0	9	0	51	0	0	10.7	0	12.2	0	83.2	0	21.8	0	0	25.3	26.4	0.7	0	21.8	0	51.9	0	14.1	-0.0441	0.978	1	0.2161	0.8953	0.9713	0.0361	0.9801	0.9982
hsa-miR-320d	153	147	118	96	101	16	221	36	193	43	84	133	89	25	39	3	342	42	155.7	98.7	63.8	68.6	79.5	17.3	242.5	37.4	229	68.3	42.6	152.6	58.2	30.5	94.6	3.1	348	37.2	101.5	-0.0214	0.9782	1	0.1695	0.8658	0.9694	0.0437	0.9479	0.9982
hsa-miR-193b-3p	1	0	0	12	13	0	0	0	0	0	11	15	0	0	0	1	0	0	1	0	0	8.6	10.2	0	0	0	0	0	5.6	17.2	0	0	0	1	0	0	2.4	-0.047	0.9784	1	0.5174	0.7831	0.9694	0.1202	0.9399	0.9982
hsa-miR-10b-3p	0	0	17	33	77	0	0	24	0	0	7	2	0	0	0	0	0	107	0	0	9.2	23.6	60.6	0	0	24.9	0	0	3.5	2.3	0	0	0	0	0	94.8	12.2	0.048	0.9786	1	-2.8459	0.1169	0.9694	0.2398	0.8807	0.9982
hsa-miR-376a-3p	0	0	50	8	0	0	0	0	0	0	7	0	23	16	0	0	0	0	0	0	27	5.7	0	0	0	0	0	0	3.5	0	15	19.5	0	0	0	0	3.9	0.0472	0.9794	1	1.423	0.4463	0.9694	0.3926	0.8158	0.9982
hsa-miR-550a-3-5p	0	7	0	28	20	0	0	0	22	5	26	10	13	8	0	0	0	12	0	4.7	0	20	15.7	0	0	0	26.1	7.9	13.2	11.5	8.5	9.8	0	0	0	10.6	7.1	0.0343	0.9812	1	-0.8513	0.5329	0.9694	-0.3957	0.7466	0.9982
hsa-miR-625-5p	0	27	16	14	0	0	0	0	0	0	0	25	8	0	0	0	0	0	0	18.1	8.7	10	0	0	0	0	0	0	0	28.7	5.2	0	0	0	0	0	3.9	-0.0341	0.9841	1	2.776	0.1422	0.9694	0.3618	0.8299	0.9982
hsa-miR-574-3p	231	1035	681	449	81	66	0	436	142	49	969	201	474	366	59	136	281	172	235	694.9	368.4	320.9	63.7	71.3	0	453.2	168.5	77.9	491	230.6	309.7	446.6	143.1	140.4	285.9	152.4	258.5	-0.0164	0.9845	1	-0.2809	0.6894	0.9694	-0.1282	0.8558	0.9982
hsa-miR-20b-5p	11	31	72	107	0	64	0	0	0	8	51	47	61	31	32	0	0	0	11.2	20.8	38.9	76.5	0	69.1	0	0	0	12.7	25.8	53.9	39.9	37.8	77.6	0	0	0	25.8	-0.0245	0.9855	1	1.2411	0.4436	0.9694	0.3095	0.8065	0.9982
hsa-miR-6741-3p	0	21	8	0	0	0	0	0	29	0	19	0	26	0	0	0	0	0	0	14.1	4.3	0	0	0	0	0	34.4	0	9.6	0	17	0	0	0	0	0	4.4	-0.0322	0.9863	1	-1.3873	0.4576	0.9694	-0.8127	0.6294	0.9982
hsa-miR-12125	8	0	0	0	0	0	0	0	0	0	0	7	0	0	0	0	0	0	8.1	0	0	0	0	0	0	0	0	0	0	8	0	0	0	0	0	0	0.9	0.0321	0.9864	1	1.5984	0.3995	0.9694	0.393	0.8255	0.9982
hsa-miR-495-3p	66	69	616	91	43	68	0	106	0	112	143	6	472	159	0	83	1	31	67.1	46.3	333.2	65	33.8	73.4	0	110.2	0	178	72.5	6.9	308.4	194	0	85.7	1	27.5	89.1	0.019	0.9868	1	0	1	1	0.0015	0.9988	0.9997
hsa-miR-483-5p	178	828	633	254	322	167	284	741	375	144	193	319	209	75	437	244	1	105	181.1	555.9	342.4	181.5	253.4	180.4	311.6	770.2	445	228.9	97.8	366	136.6	91.5	1060	251.8	1	93.1	308.2	-0.0127	0.9876	1	-0.3972	0.714	0.9694	-0.1708	0.8063	0.9982
hsa-miR-181c-5p	0	0	56	37	0	0	0	0	0	98	31	1	0	43	0	0	0	2	0	0	30.3	26.4	0	0	0	0	0	155.8	15.7	1.1	0	52.5	0	0	0	1.8	15.8	-0.0258	0.9884	1	-4.385	0.0073	0.9694	-0.9897	0.542	0.9982
hsa-miR-664b-5p	1	10	0	0	0	0	0	41	0	0	0	0	0	6	0	0	0	0	1	6.7	0	0	0	0	0	42.6	0	0	0	0	0	7.3	0	0	0	0	0.8	-0.0258	0.989	1	-2.091			0.3416	0.848	0.9982
hsa-miR-485-3p	332	368	401	106	66	0	0	179	0	933	111	28	1002	102	0	47	0	70	337.8	247.1	216.9	75.8	51.9	0	0	186.1	0	1483	56.2	32.1	654.7	124.5	0	48.5	0	62	198.7	0.0164	0.9903	1	-1.3354	0.3855	0.9694	-0.7485	0.552	0.9982
hsa-miR-151a-5p	5081	5304	3603	2916	2294	1384	968	2369	1652	3925	7172	1214	6241	3082	554	1942	788	3915	5169.3	3561.2	1949.1	2084.1	1805.4	1494.7	1062.1	2462.3	1960.3	6238.7	3634.4	1392.7	4077.9	3761.1	1343.8	2004.4	801.8	3469.5	2681.8	-0.0058	0.991	1	-0.5303	0.425	0.9694	-0.2428	0.5828	0.9982
hsa-miR-139-5p	579	501	948	732	107	407	48	416	82	249	1198	343	419	482	189	170	59	618	589.1	336.4	512.8	523.2	84.2	439.6	52.7	432.4	97.3	395.8	607.1	393.5	273.8	588.2	458.5	175.5	60	547.7	364.9	-0.0066	0.9917	1	-0.0933	0.9021	0.9713	-0.0525	0.9226	0.9982
hsa-miR-337-5p	48	0	1	0	0	0	0	0	0	0	14	0	0	0	0	0	0	0	48.8	0	0.5	0	0	0	0	0	0	0	7.1	0	0	0	0	0	0	0	0.4	0.019	0.992	1	-2.0265	0.2841	0.9694	-1.0776	0.5466	0.9982
hsa-let-7e-3p	0	0	0	0	0	1	0	0	0	0	4	0	18	0	0	0	0	0	0	0	0	0	0	1.1	0	0	0	0	2	0	11.8	0	0	0	0	0	0.2	0.019	0.992	1	-0.9918	0.6016	0.9694	-0.4665	0.7942	0.9982
hsa-miR-20a-3p	0	1	0	0	0	0	0	0	0	0	4	0	0	0	0	0	0	0	0	0.7	0	0	0	0	0	0	0	0	2	0	0	0	0	0	0	0	0.1	0.019	0.992	1	-0.9918	0.6016	0.9694	-0.4665	0.7942	0.9982
hsa-miR-6749-3p	0	24	0	1	0	0	0	0	0	0	4	0	0	0	0	0	0	0	0	16.1	0	0.7	0	0	0	0	0	0	2	0	0	0	0	0	0	0	0.2	0.019	0.992	1	-0.9918	0.6016	0.9694	-0.4665	0.7942	0.9982
hsa-miR-217-5p	0	0	34	1	0	0	0	0	0	0	4	0	0	0	0	0	0	0	0	0	18.4	0.7	0	0	0	0	0	0	2	0	0	0	0	0	0	0	0.2	0.019	0.992	1	-0.9918	0.6016	0.9694	-0.4665	0.7942	0.9982
hsa-miR-5690	0	0	0	1	0	0	0	0	0	0	3	0	0	0	0	0	0	0	0	0	0	0.7	0	0	0	0	0	0	1.5	0	0	0	0	0	0	0	0.1	0.019	0.992	1	-0.8241	0.6645	0.9694	-0.3677	0.8371	0.9982
hsa-miR-378d	0	0	0	0	0	2	0	28	0	0	4	0	0	0	0	0	168	1	0	0	0	0	0	2.2	0	29.1	0	0	2	0	0	0	0	0	170.9	0.9	0.3	0.019	0.992	1	-3.3576			-0.3499	0.8449	0.9982
hsa-miR-4677-3p	62	0	0	0	0	0	1	0	0	0	2	0	0	0	0	0	0	0	63.1	0	0	0	0	0	1.1	0	0	0	1	0	0	0	0	0	0	0	0.1	0.019	0.992	1	-0.6115	0.7477	0.9694	-0.2522	0.8879	0.9982
hsa-miR-4516	0	0	0	2	0	0	0	0	0	0	0	0	0	1	0	0	0	0	0	0	0	1.4	0	0	0	0	0	0	0	0	0	1.2	0	0	0	0	0.1	0.019	0.992	1	0.3371	0.8593	0.9694	0.1271	0.9433	0.9982
hsa-miR-92a-2-5p	0	1	44	0	0	0	0	0	0	0	1	0	0	0	0	0	0	0	0	0.7	23.8	0	0	0	0	0	0	0	0.5	0	0	0	0	0	0	0	0.1	0.019	0.992	1	-0.3184	0.867	0.9694	-0.1092	0.9513	0.9982
hsa-miR-6767-5p	0	0	0	1	0	0	0	18	0	0	0	0	0	0	0	0	0	0	0	0	0	0.7	0	0	0	18.7	0	0	0	0	0	0	0	0	0	0	0	0.019	0.992	1	-2.9064	0.1235	0.9694	0.0412	0.9816	0.9982
hsa-miR-4473	0	0	0	1	0	0	0	0	0	0	0	0	0	0	0	0	125	0	0	0	0	0.7	0	0	0	0	0	0	0	0	0	0	0	0	127.2	0	0	0.019	0.992	1	0	1		0.0412	0.9816	0.9982
hsa-miR-641	0	0	0	1	0	0	0	0	0	0	25	0	0	0	0	0	0	0	0	0	0	0.7	0	0	0	0	0	0	12.7	0	0	0	0	0	0	0	0	0.019	0.992	1	-2.5772			0.0412	0.9816	0.9982
hsa-miR-3191-5p	0	0	0	1	0	0	0	0	0	0	0	0	0	0	0	0	0	0	0	0	0	0.7	0	0	0	0	0	0	0	0	0	0	0	0	0	0	0	0.019	0.992	1				0.0412	0.9816	0.9982
hsa-miR-378g	0	0	1	0	0	0	0	0	0	0	0	0	0	0	0	0	0	0	0	0	0.5	0	0	0	0	0	0	0	0	0	0	0	0	0	0	0	0	0.019	0.992	1				0.0412	0.9816	0.9982
hsa-miR-513c-3p	0	0	1	0	0	0	0	0	0	0	0	0	0	0	0	0	0	0	0	0	0.5	0	0	0	0	0	0	0	0	0	0	0	0	0	0	0	0	0.019	0.992	1				0.0412	0.9816	0.9982
hsa-miR-6864-5p	0	0	0	1	0	0	0	0	0	0	0	0	0	0	0	0	0	0	0	0	0	0.7	0	0	0	0	0	0	0	0	0	0	0	0	0	0	0	0.019	0.992	1				0.0412	0.9816	0.9982
hsa-miR-877-3p	38	30	15	19	0	0	0	0	2	0	28	0	66	30	0	0	0	0	38.7	20.1	8.1	13.6	0	0	0	0	2.4	0	14.2	0	43.1	36.6	0	0	0	0	9.8	0.0153	0.9926	1	0.9281	0.6092	0.9694	0.2934	0.8419	0.9982
hsa-miR-409-5p	58	10	80	11	0	0	0	0	0	33	31	0	41	8	0	79	0	0	59	6.7	43.3	7.9	0	0	0	0	0	52.5	15.7	0	26.8	9.8	0	81.5	0	0	16.8	0.0139	0.9929	1	-0.0035	0.9984	1	0.0067	0.9963	0.9997
hsa-miR-30e-5p	3548	7336	14433	11413	6488	3281	3951	4948	3209	1732	11339	3316	11194	5227	1847	6060	3582	6062	3609.7	4925.5	7807.7	8157	5106.1	3543.5	4334.9	5142.9	3807.8	2753	5746	3804.1	7314.3	6378.8	4480.2	6254.8	3644.7	5372.3	5121.3	-0.0021	0.995	1	0.2779	0.5623	0.9694	0.091	0.7427	0.9982
hsa-miR-141-3p	0	0	52	25	0	0	0	0	0	8	21	3	13	28	0	0	0	0	0	0	28.1	17.9	0	0	0	0	0	12.7	10.6	3.4	8.5	34.2	0	0	0	0	6.4	0.0036	0.9983	1	0.1595	0.9251	0.9781	0.0465	0.9759	0.9982
hsa-miR-501-3p	155	141	209	251	111	243	0	141	156	121	202	92	221	74	63	41	1	388	157.7	94.7	113.1	179.4	87.4	262.4	0	146.6	185.1	192.3	102.4	105.5	144.4	90.3	152.8	42.3	1	343.9	133.4	0.0018	0.9985	1	-0.2761	0.77	0.9694	-0.1304	0.8609	0.9982
hsa-miR-3200-5p	0	0	14	36	0	0	113	0	0	0	34	68	0	23	22	0	0	0	0	0	7.6	25.7	0	0	124	0	0	0	17.2	78	0	28.1	53.4	0	0	0	18.6	0.0024	0.9989	1	1.5074	0.4087	0.9694	0.3777	0.8151	0.9982
hsa-miR-628-3p	171	192	23	76	0	72	0	150	88	220	132	18	160	97	0	116	0	83	174	128.9	12.4	54.3	0	77.8	0	155.9	104.4	349.7	66.9	20.6	104.5	118.4	0	119.7	0	73.6	86.7	0.0001	1	1	-1.2606	0.2925	0.9694	-0.6432	0.5387	0.9982
hsa-miR-6842-3p	0	0	0	0	0	0	0	49	0	22	32	0	0	0	0	120	0	0	0	0	0	0	0	0	0	50.9	0	35	16.2	0	0	0	0	123.9	0	0	5.7	0	1		-0.375	0.8389	0.9694	-3.0441	0.0796	0.9982
hsa-miR-452-5p	0	0	0	0	0	0	0	0	23	21	9	0	33	0	0	0	0	0	0	0	0	0	0	0	0	0	27.3	33.4	4.6	0	21.6	0	0	0	0	0	3.6	0	1		-1.6588	0.3502	0.9694	-2.8044	0.1157	0.9982
hsa-miR-1292-5p	0	34	0	0	0	0	0	0	0	20	14	0	33	0	0	0	0	0	0	22.8	0	0	0	0	0	0	0	31.8	7.1	0	21.6	0	0	0	0	0	3.4	0	1		-1.006	0.5913	0.9694	-2.7687	0.1205	0.9982
hsa-miR-214-5p	0	0	0	0	29	0	0	26	0	0	8	0	0	0	0	0	0	0	0	0	0	0	22.8	0	0	27	0	0	4.1	0	0	0	0	0	0	0	3	0	1		-3.4018	0.0712	0.9694	-2.678	0.1332	0.9982
hsa-miR-33a-5p	0	22	0	0	0	0	0	0	0	14	0	0	0	0	0	0	0	0	0	14.8	0	0	0	0	0	0	0	22.3	0	0	0	0	0	0	0	0	2.1	0	1		-2.998	0.1121	0.9694	-2.3704	0.1839	0.9982
hsa-miR-4436b-3p	43	0	0	0	0	0	0	0	0	14	0	0	0	0	0	0	0	0	43.7	0	0	0	0	0	0	0	0	22.3	0	0	0	0	0	0	0	0	1.2	0	1		-2.998	0.1121	0.9694	-1.9262	0.2805	0.9982
hsa-miR-6832-5p	32	0	0	0	0	0	0	0	0	13	0	0	0	0	0	0	0	0	32.6	0	0	0	0	0	0	0	0	20.7	0	0	0	0	0	0	0	0	1.1	0	1		-2.9256	0.1211	0.9694	-1.8622	0.2968	0.9982
hsa-miR-3127-5p	0	0	0	17	0	0	0	0	0	0	14	0	0	0	0	0	87	0	0	0	0	12.2	0	0	0	0	0	0	7.1	0	0	0	0	0	88.5	0	1.1	0	1		-2.0265	0.2841	0.9694	-1.8339	0.3042	0.9982
hsa-miR-154-3p	0	0	22	0	0	0	0	0	0	37	12	0	0	0	0	0	0	0	0	0	11.9	0	0	0	0	0	0	58.8	6.1	0	0	0	0	0	0	0	1	0	1		-4.0913	0.0294	0.9694	-1.7812	0.3184	0.9982
hsa-miR-6815-5p	0	0	0	23	0	0	0	0	53	0	1	25	0	0	0	0	0	0	0	0	0	16.4	0	0	0	0	62.9	0	0.5	28.7	0	0	0	0	0	0	0.9	0	1		-4.0733			-1.725	0.3339	0.9982
hsa-miR-4467	0	16	0	0	0	0	0	0	0	0	9	0	0	0	0	0	0	0	0	10.7	0	0	0	0	0	0	0	0	4.6	0	0	0	0	0	0	0	0.9	0	1		-1.6151	0.3942	0.9694	-1.6435	0.3573	0.9982
hsa-miR-4443	0	0	0	0	0	0	0	0	0	7	5	0	14	0	0	0	0	0	0	0	0	0	0	0	0	0	0	11.1	2.5	0	9.1	0	0	0	0	0	0.8	0	1		-0.807	0.6673	0.9694	-1.5142	0.3965	0.9982
hsa-miR-618	0	0	0	18	0	0	0	0	0	0	35	0	0	0	0	0	0	0	0	0	0	12.9	0	0	0	0	0	0	17.7	0	0	0	0	0	0	0	0.7	0	1		-2.8951			-1.4951	0.4025	0.9982
hsa-miR-6516-5p	29	0	0	0	0	0	0	0	0	0	23	0	0	0	0	0	0	0	29.5	0	0	0	0	0	0	0	0	0	11.7	0	0	0	0	0	0	0	0.6	0	1		-2.4987			-1.421	0.4263	0.9982
hsa-miR-1273h-3p	0	0	0	0	0	0	0	89	0	0	22	0	0	0	0	137	0	0	0	0	0	0	0	0	0	92.5	0	0	11.1	0	0	0	0	141.4	0	0	0.6	0	1		-4.6977			-1.3831	0.4388	0.9982
hsa-miR-183-3p	0	0	40	0	0	0	0	0	0	0	19	0	0	0	0	0	0	0	0	0	21.6	0	0	0	0	0	0	0	9.6	0	0	0	0	0	0	0	0.5	0	1		-2.3159	0.2205	0.9694	-1.2631	0.4796	0.9982
hsa-miR-6780a-5p	0	0	0	0	0	0	0	0	144	0	18	0	15	0	0	0	0	0	0	0	0	0	0	0	0	0	170.9	0	9.1	0	9.8	0	0	0	0	0	0.5	0	1		-3.2342			-1.2197	0.4949	0.9982
hsa-miR-197-5p	81	0	0	0	0	0	0	0	1	1	11	0	0	0	0	0	0	0	82.4	0	0	0	0	0	0	0	1.2	1.6	5.6	0	0	0	0	0	0	0	0.5	0	1		-2.1484	0.2557	0.9694	-1.1009	0.5379	0.9982
hsa-miR-636	0	72	0	0	0	0	0	0	0	0	14	0	0	0	0	0	0	0	0	48.3	0	0	0	0	0	0	0	0	7.1	0	0	0	0	0	0	0	0.4	0	1		-2.0265	0.2841	0.9694	-1.0216	0.5676	0.9982
hsa-miR-758-3p	0	22	0	0	0	0	0	0	0	0	10	0	0	0	0	0	0	0	0	14.8	0	0	0	0	0	0	0	0	5.1	0	0	0	0	0	0	0	0.3	0	1		-1.7123	0.3661	0.9694	-0.8043	0.6528	0.9982
hsa-miR-195-3p	0	0	0	0	0	0	90	0	0	0	10	0	0	0	0	0	0	0	0	0	0	0	0	0	98.7	0	0	0	5.1	0	0	0	0	0	0	0	0.3	0	1		-1.7123	0.3661	0.9694	-0.8043	0.6528	0.9982
hsa-miR-6850-5p	0	0	0	0	0	0	0	0	0	0	9	0	0	14	0	0	0	0	0	0	0	0	0	0	0	0	0	0	4.6	0	0	17.1	0	0	0	0	0.3	0	1		0.6177	0.7427	0.9694	-0.7428	0.6778	0.9982
hsa-miR-548n	0	0	0	0	0	0	0	0	0	0	8	0	17	0	0	0	0	0	0	0	0	0	0	0	0	0	0	0	4.1	0	11.1	0	0	0	0	0	0.2	0	1		-1.5071	0.4268	0.9694	-0.6756	0.7056	0.9982
hsa-miR-8072	0	29	0	0	0	0	0	0	0	0	8	14	0	0	0	0	0	0	0	19.5	0	0	0	0	0	0	0	0	4.1	16.1	0	0	0	0	0	0	0.2	0	1		0.6734	0.7206	0.9694	-0.6756	0.7056	0.9982
hsa-miR-3157-5p	0	0	0	0	33	0	0	0	0	0	7	0	0	0	0	0	0	0	0	0	0	0	26	0	0	0	0	0	3.5	0	0	0	0	0	0	0	0.2	0	1		-1.3962	0.4618	0.9694	-0.6038	0.7356	0.9982
hsa-miR-450a-2-3p	0	0	0	0	0	0	0	0	0	0	6	0	0	23	0	0	0	0	0	0	0	0	0	0	0	0	0	0	3	0	0	28.1	0	0	0	0	0.2	0	1		-1.2721	0.5028	0.9694	-0.5266	0.7684	0.9982
hsa-miR-149-5p	0	0	0	0	0	0	0	0	0	0	6	0	37	0	0	0	0	0	0	0	0	0	0	0	0	0	0	0	3	0	24.2	0	0	0	0	0	0.2	0	1		-1.2721	0.5028	0.9694	-0.5266	0.7684	0.9982
hsa-miR-6855-3p	0	0	0	0	0	0	168	0	0	0	6	0	30	0	0	0	0	0	0	0	0	0	0	0	184.3	0	0	0	3	0	19.6	0	0	0	0	0	0.2	0	1		-1.2721	0.5028	0.9694	-0.5266	0.7684	0.9982
hsa-miR-1277-3p	0	0	0	0	0	0	0	27	0	0	6	0	23	0	0	0	0	0	0	0	0	0	0	0	0	28.1	0	0	3	0	15	0	0	0	0	0	0.2	0	1		-3.4014			-0.5266	0.7684	0.9982
hsa-miR-34a-3p	0	0	20	0	0	0	0	0	0	0	4	0	0	0	0	0	0	0	0	0	10.8	0	0	0	0	0	0	0	2	0	0	0	0	0	0	0	0.1	0	1		-0.9918	0.6016	0.9694	-0.3532	0.8435	0.9982
hsa-miR-1271-5p	59	0	0	0	0	0	0	0	0	0	4	0	0	0	0	0	0	0	60	0	0	0	0	0	0	0	0	0	2	0	0	0	0	0	0	0	0.1	0	1		-0.9918	0.6016	0.9694	-0.3532	0.8435	0.9982
hsa-miR-7856-5p	0	0	0	0	0	0	0	0	0	0	3	0	0	0	0	68	0	0	0	0	0	0	0	0	0	0	0	0	1.5	0	0	0	0	70.2	0	0	0.1	0	1		-0.8241	0.6645	0.9694	-0.2484	0.8896	0.9982
hsa-miR-605-5p	0	0	0	0	0	0	0	0	0	0	3	0	0	26	0	0	0	0	0	0	0	0	0	0	0	0	0	0	1.5	0	0	31.7	0	0	0	0	0.1	0	1		-0.8241	0.6645	0.9694	-0.2484	0.8896	0.9982
hsa-miR-4435	0	0	20	0	0	0	0	0	0	0	3	0	0	0	0	0	0	0	0	0	10.8	0	0	0	0	0	0	0	1.5	0	0	0	0	0	0	0	0.1	0	1		-0.8241	0.6645	0.9694	-0.2484	0.8896	0.9982
hsa-miR-6789-3p	0	0	0	20	0	0	0	0	0	0	3	0	0	0	0	0	0	0	0	0	0	14.3	0	0	0	0	0	0	1.5	0	0	0	0	0	0	0	0.1	0	1		-0.8241	0.6645	0.9694	-0.2484	0.8896	0.9982
hsa-miR-491-3p	25	0	0	0	0	0	0	0	0	0	3	0	0	0	0	0	0	0	25.4	0	0	0	0	0	0	0	0	0	1.5	0	0	0	0	0	0	0	0.1	0	1		-0.8241	0.6645	0.9694	-0.2484	0.8896	0.9982
hsa-miR-6780b-3p	0	0	0	0	0	0	0	0	0	0	2	0	20	0	0	0	0	0	0	0	0	0	0	0	0	0	0	0	1	0	13.1	0	0	0	0	0	0.1	0	1		-0.6115	0.7477	0.9694	-0.1092	0.9513	0.9982
hsa-miR-7113-5p	0	0	0	20	0	0	0	0	0	0	2	0	0	0	0	0	0	0	0	0	0	14.3	0	0	0	0	0	0	1	0	0	0	0	0	0	0	0.1	0	1		-0.6115	0.7477	0.9694	-0.1092	0.9513	0.9982
hsa-miR-181b-3p	0	0	0	0	40	0	0	0	0	0	2	0	0	0	0	0	0	0	0	0	0	0	31.5	0	0	0	0	0	1	0	0	0	0	0	0	0	0.1	0	1		-0.6115	0.7477	0.9694	-0.1092	0.9513	0.9982
hsa-miR-4485-3p	77	0	0	0	0	0	0	0	1	0	0	0	0	0	0	0	0	0	78.3	0	0	0	0	0	0	0	1.2	0	0	0	0	0	0	0	0	0	0.1	0	1		-0.332	0.8614	0.9694	0.0412	0.9816	0.9982
hsa-miR-20b-3p	0	0	0	0	59	0	0	0	0	0	1	0	0	0	0	209	0	0	0	0	0	0	46.4	0	0	0	0	0	0.5	0	0	0	0	215.7	0	0	0	0	1		-0.3184	0.867	0.9694	0.0412	0.9816	0.9982
hsa-miR-6879-3p	0	74	0	0	0	0	0	0	0	0	0	0	0	16	0	0	0	0	0	49.7	0	0	0	0	0	0	0	0	0	0	0	19.5	0	0	0	0	0	0	1		2.3082	0.2227	0.9694	0	1
hsa-miR-5695	0	19	0	0	0	0	0	0	0	0	0	15	0	0	0	0	0	0	0	12.8	0	0	0	0	0	0	0	0	0	17.2	0	0	0	0	0	0	0	0	1		2.2154	0.242	0.9694	0	1
hsa-miR-629-3p	0	0	0	0	0	0	0	0	0	0	13	0	0	0	0	0	0	59	0	0	0	0	0	0	0	0	0	0	6.6	0	0	0	0	0	0	52.3	0	0	1		-1.9569	0.3011	0.9694	0	1
hsa-miR-377-5p	0	0	0	0	0	0	0	0	0	0	0	0	15	0	0	0	0	0	0	0	0	0	0	0	0	0	0	0	0	0	9.8	0	0	0	0	0	0	0	1		1.7461	0.3571	0.9694	0	1
hsa-miR-3619-5p	0	0	0	0	0	0	0	0	0	0	0	0	0	0	0	17	0	0	0	0	0	0	0	0	0	0	0	0	0	0	0	0	0	17.5	0	0	0	0	1		0	1		0	1
hsa-miR-6858-3p	0	0	0	0	0	0	0	0	0	0	0	0	19	0	0	0	0	0	0	0	0	0	0	0	0	0	0	0	0	0	12.4	0	0	0	0	0	0	0	1		0	1		0	1
hsa-miR-4525	0	0	0	0	0	0	0	0	0	0	0	17	0	0	0	0	0	0	0	0	0	0	0	0	0	0	0	0	0	19.5	0	0	0	0	0	0	0	0	1		0	1		0	1
hsa-miR-4695-3p	0	0	0	0	0	0	0	0	0	0	0	18	0	0	0	0	0	0	0	0	0	0	0	0	0	0	0	0	0	20.6	0	0	0	0	0	0	0	0	1		0	1		0	1
hsa-miR-5009-5p	0	0	0	0	0	0	0	0	0	0	0	0	22	0	0	0	0	0	0	0	0	0	0	0	0	0	0	0	0	0	14.4	0	0	0	0	0	0	0	1		0	1		0	1
hsa-miR-6805-5p	0	0	0	0	0	0	0	0	0	0	0	0	24	0	0	0	0	0	0	0	0	0	0	0	0	0	0	0	0	0	15.7	0	0	0	0	0	0	0	1		0	1		0	1
hsa-miR-154-5p	0	0	0	0	0	0	0	0	0	0	0	0	26	0	0	0	0	0	0	0	0	0	0	0	0	0	0	0	0	0	17	0	0	0	0	0	0	0	1		0	1		0	1
hsa-miR-124-3p	0	0	0	0	0	0	0	0	0	0	0	0	31	0	0	0	0	0	0	0	0	0	0	0	0	0	0	0	0	0	20.3	0	0	0	0	0	0	0	1		0	1		0	1
hsa-miR-4668-3p	0	0	0	0	0	0	0	0	0	0	0	0	0	0	0	31	0	0	0	0	0	0	0	0	0	0	0	0	0	0	0	0	0	32	0	0	0	0	1		0	1		0	1
hsa-miR-6884-3p	0	0	0	0	0	0	0	0	0	0	0	0	0	0	17	0	0	0	0	0	0	0	0	0	0	0	0	0	0	0	0	0	41.2	0	0	0	0	0	1		0	1		0	1
hsa-miR-3150a-3p	0	0	0	0	0	0	0	0	0	0	0	0	0	0	0	0	0	42	0	0	0	0	0	0	0	0	0	0	0	0	0	0	0	0	0	37.2	0	0	1		0	1		0	1
hsa-miR-33b-5p	0	0	0	0	0	0	0	0	0	0	0	0	44	0	0	0	0	0	0	0	0	0	0	0	0	0	0	0	0	0	28.8	0	0	0	0	0	0	0	1		0	1		0	1
hsa-miR-4707-5p	0	0	0	0	0	0	0	0	0	0	0	0	50	0	0	0	0	0	0	0	0	0	0	0	0	0	0	0	0	0	32.7	0	0	0	0	0	0	0	1		0	1		0	1
hsa-miR-544b	0	0	0	0	0	0	0	0	0	0	0	0	0	26	0	0	0	0	0	0	0	0	0	0	0	0	0	0	0	0	0	31.7	0	0	0	0	0	0	1		0	1		0	1
hsa-miR-3939	0	0	0	0	0	0	0	0	0	0	0	0	0	0	24	0	0	0	0	0	0	0	0	0	0	0	0	0	0	0	0	0	58.2	0	0	0	0	0	1		0	1		0	1
hsa-miR-4716-3p	0	0	0	0	0	0	0	0	0	0	0	0	0	0	24	0	0	0	0	0	0	0	0	0	0	0	0	0	0	0	0	0	58.2	0	0	0	0	0	1		0	1		0	1
hsa-miR-491-5p	0	0	0	0	0	0	0	0	0	0	0	0	0	0	0	0	0	75	0	0	0	0	0	0	0	0	0	0	0	0	0	0	0	0	0	66.5	0	0	1		0	1		0	1
hsa-miR-4667-5p	0	0	0	0	0	0	0	0	0	0	0	0	0	0	0	0	85	0	0	0	0	0	0	0	0	0	0	0	0	0	0	0	0	0	86.5	0	0	0	1		0	1		0	1
hsa-miR-513a-5p	0	29	0	0	0	0	0	0	0	0	0	0	0	0	68	0	0	0	0	19.5	0	0	0	0	0	0	0	0	0	0	0	0	164.9	0	0	0	0	0	1		0	1		0	1
hsa-miR-6866-5p	0	0	33	0	0	0	0	0	0	0	0	22	0	0	0	0	0	0	0	0	17.9	0	0	0	0	0	0	0	0	25.2	0	0	0	0	0	0	0	0	1		0	1		0	1
hsa-miR-370-5p	54	0	0	0	0	0	0	0	0	0	0	0	32	0	0	0	0	0	54.9	0	0	0	0	0	0	0	0	0	0	0	20.9	0	0	0	0	0	0	0	1		0	1		0	1
hsa-miR-128-1-5p	93	0	0	0	0	0	0	0	0	0	0	0	0	0	0	0	0	0	94.6	0	0	0	0	0	0	0	0	0	0	0	0	0	0	0	0	0	0	0	1					0	1
hsa-miR-6785-5p	0	0	0	0	121	0	0	0	0	0	0	0	0	0	0	0	0	0	0	0	0	0	95.2	0	0	0	0	0	0	0	0	0	0	0	0	0	0	0	1					0	1
hsa-miR-6736-5p	66	0	0	0	0	0	0	0	0	0	0	0	0	0	0	0	0	0	67.1	0	0	0	0	0	0	0	0	0	0	0	0	0	0	0	0	0	0	0	1					0	1
hsa-miR-6716-3p	0	0	0	0	0	0	61	0	0	0	0	0	0	0	0	0	0	0	0	0	0	0	0	0	66.9	0	0	0	0	0	0	0	0	0	0	0	0	0	1					0	1
hsa-miR-548w	39	0	0	0	0	0	0	0	0	0	0	0	0	0	0	0	0	0	39.7	0	0	0	0	0	0	0	0	0	0	0	0	0	0	0	0	0	0	0	1					0	1
hsa-miR-3686	0	0	0	0	43	0	0	0	0	0	0	0	0	0	0	0	0	0	0	0	0	0	33.8	0	0	0	0	0	0	0	0	0	0	0	0	0	0	0	1					0	1
hsa-miR-4689	0	29	0	0	0	0	0	0	0	0	0	0	0	0	0	0	0	0	0	19.5	0	0	0	0	0	0	0	0	0	0	0	0	0	0	0	0	0	0	1					0	1
hsa-miR-4762-3p	0	0	33	0	0	0	0	0	0	0	0	0	0	0	0	0	0	0	0	0	17.9	0	0	0	0	0	0	0	0	0	0	0	0	0	0	0	0	0	1					0	1
hsa-miR-6842-5p	0	0	0	0	30	0	0	0	0	0	0	0	0	0	0	0	0	0	0	0	0	0	23.6	0	0	0	0	0	0	0	0	0	0	0	0	0	0	0	1					0	1
hsa-miR-4688	0	24	0	0	0	0	0	0	0	0	0	0	0	0	0	0	0	0	0	16.1	0	0	0	0	0	0	0	0	0	0	0	0	0	0	0	0	0	0	1					0	1
hsa-miR-4423-5p	0	23	0	0	0	0	0	0	0	0	0	0	0	0	0	0	0	0	0	15.4	0	0	0	0	0	0	0	0	0	0	0	0	0	0	0	0	0	0	1					0	1
hsa-miR-6740-5p	0	23	0	0	0	0	0	0	0	0	0	0	0	0	0	0	0	0	0	15.4	0	0	0	0	0	0	0	0	0	0	0	0	0	0	0	0	0	0	1					0	1
hsa-miR-5090	0	0	0	25	0	0	0	0	0	0	0	0	0	0	0	0	0	0	0	0	0	17.9	0	0	0	0	0	0	0	0	0	0	0	0	0	0	0	0	1					0	1
hsa-miR-3691-3p	0	0	0	0	25	0	0	0	0	0	0	0	0	0	0	0	0	0	0	0	0	0	19.7	0	0	0	0	0	0	0	0	0	0	0	0	0	0	0	1					0	1
hsa-miR-6818-3p	0	0	26	0	0	0	0	0	0	0	0	0	0	0	0	0	0	0	0	0	14.1	0	0	0	0	0	0	0	0	0	0	0	0	0	0	0	0	0	1					0	1
hsa-miR-6873-5p	0	22	0	0	0	0	0	0	0	0	0	0	0	0	0	0	0	0	0	14.8	0	0	0	0	0	0	0	0	0	0	0	0	0	0	0	0	0	0	1					0	1
hsa-miR-660-3p	0	0	0	23	0	0	0	0	0	0	0	0	0	0	0	0	0	0	0	0	0	16.4	0	0	0	0	0	0	0	0	0	0	0	0	0	0	0	0	1					0	1
hsa-miR-1278	0	0	0	22	0	0	0	0	0	0	0	0	0	0	0	0	0	0	0	0	0	15.7	0	0	0	0	0	0	0	0	0	0	0	0	0	0	0	0	1					0	1
hsa-miR-6851-5p	0	0	0	22	0	0	0	0	0	0	0	0	0	0	0	0	0	0	0	0	0	15.7	0	0	0	0	0	0	0	0	0	0	0	0	0	0	0	0	1					0	1
hsa-miR-552-5p	0	20	0	0	0	0	0	0	0	0	0	0	0	0	0	0	0	0	0	13.4	0	0	0	0	0	0	0	0	0	0	0	0	0	0	0	0	0	0	1					0	1
hsa-miR-664b-3p	0	0	0	0	22	0	0	0	0	0	0	0	0	0	0	0	0	0	0	0	0	0	17.3	0	0	0	0	0	0	0	0	0	0	0	0	0	0	0	1					0	1
hsa-miR-3691-5p	0	0	0	0	21	0	0	0	0	0	0	0	0	0	0	0	0	0	0	0	0	0	16.5	0	0	0	0	0	0	0	0	0	0	0	0	0	0	0	1					0	1
hsa-miR-324-3p	0	0	0	19	0	0	0	0	0	0	0	0	0	0	0	0	0	0	0	0	0	13.6	0	0	0	0	0	0	0	0	0	0	0	0	0	0	0	0	1					0	1
hsa-miR-4477b	0	0	0	18	0	0	0	0	0	0	0	0	0	0	0	0	0	0	0	0	0	12.9	0	0	0	0	0	0	0	0	0	0	0	0	0	0	0	0	1					0	1
hsa-miR-4766-3p	0	0	0	18	0	0	0	0	0	0	0	0	0	0	0	0	0	0	0	0	0	12.9	0	0	0	0	0	0	0	0	0	0	0	0	0	0	0	0	1					0	1
hsa-miR-548s	0	0	0	18	0	0	0	0	0	0	0	0	0	0	0	0	0	0	0	0	0	12.9	0	0	0	0	0	0	0	0	0	0	0	0	0	0	0	0	1					0	1
hsa-miR-296-3p	0	16	0	0	0	0	0	0	0	0	0	0	0	0	0	0	0	0	0	10.7	0	0	0	0	0	0	0	0	0	0	0	0	0	0	0	0	0	0	1					0	1
hsa-miR-550b-2-5p	0	16	0	0	0	0	0	0	0	0	0	0	0	0	0	0	0	0	0	10.7	0	0	0	0	0	0	0	0	0	0	0	0	0	0	0	0	0	0	1					0	1
hsa-miR-202-5p	0	0	0	17	0	0	0	0	0	0	0	0	0	0	0	0	0	0	0	0	0	12.2	0	0	0	0	0	0	0	0	0	0	0	0	0	0	0	0	1					0	1
hsa-miR-4750-5p	0	0	0	17	0	0	0	0	0	0	0	0	0	0	0	0	0	0	0	0	0	12.2	0	0	0	0	0	0	0	0	0	0	0	0	0	0	0	0	1					0	1
hsa-miR-548a-5p	0	0	0	17	0	0	0	0	0	0	0	0	0	0	0	0	0	0	0	0	0	12.2	0	0	0	0	0	0	0	0	0	0	0	0	0	0	0	0	1					0	1
hsa-miR-4753-5p	0	0	16	0	0	0	0	0	0	0	0	0	0	0	0	0	0	0	0	0	8.7	0	0	0	0	0	0	0	0	0	0	0	0	0	0	0	0	0	1					0	1
hsa-miR-561-5p	0	0	0	15	0	0	0	0	0	0	0	0	0	0	0	0	0	0	0	0	0	10.7	0	0	0	0	0	0	0	0	0	0	0	0	0	0	0	0	1					0	1
hsa-miR-3942-3p	0	0	15	0	0	0	0	0	0	0	0	0	0	0	0	0	0	0	0	0	8.1	0	0	0	0	0	0	0	0	0	0	0	0	0	0	0	0	0	1					0	1
hsa-miR-5001-3p	0	0	0	14	0	0	0	0	0	0	0	0	0	0	0	0	0	0	0	0	0	10	0	0	0	0	0	0	0	0	0	0	0	0	0	0	0	0	1					0	1
hsa-miR-5589-5p	0	0	0	14	0	0	0	0	0	0	0	0	0	0	0	0	0	0	0	0	0	10	0	0	0	0	0	0	0	0	0	0	0	0	0	0	0	0	1					0	1
hsa-miR-6764-5p	0	0	0	0	0	0	0	0	0	10	0	0	0	0	0	0	0	0	0	0	0	0	0	0	0	0	0	15.9	0	0	0	0	0	0	0	0	0.9				-2.6697	0.1574	0.9694	-1.6355	0.3597	0.9982
hsa-miR-7849-3p	0	0	0	0	0	0	0	0	0	9	0	0	0	0	0	0	0	0	0	0	0	0	0	0	0	0	0	14.3	0	0	0	0	0	0	0	0	0.8				-2.567	0.1741	0.9694	-1.5443	0.3872	0.9982
hsa-miR-4676-3p	0	0	0	0	0	0	0	0	0	7	0	0	0	0	0	0	0	0	0	0	0	0	0	0	0	0	0	11.1	0	0	0	0	0	0	0	0	0.6				-2.3179	0.2201	0.9694	-1.23	0.4912	0.9982
hsa-miR-3617-5p	0	0	0	0	0	0	0	6	0	0	5	0	0	0	0	0	0	0	0	0	0	0	0	0	0	6.2	0	0	2.5	0	0	0	0	0	0	0	0.5				-2.1892	0.247	0.9694	-1.1644	0.5147	0.9982
hsa-miR-3682-3p	0	0	0	0	0	0	0	0	0	0	11	0	0	0	0	0	0	0	0	0	0	0	0	0	0	0	0	0	5.6	0	0	0	0	0	0	0	0.3				-1.8008	0.3417	0.9694	-0.861	0.6301	0.9982
hsa-miR-138-5p	0	0	0	0	0	0	0	0	0	0	10	0	0	0	0	0	0	0	0	0	0	0	0	0	0	0	0	0	5.1	0	0	0	0	0	0	0	0.3				-1.7123	0.3661	0.9694	-0.8043	0.6528	0.9982
hsa-miR-642a-5p	0	0	0	0	0	0	0	0	0	0	10	0	0	0	0	0	0	0	0	0	0	0	0	0	0	0	0	0	5.1	0	0	0	0	0	0	0	0.3				-1.7123	0.3661	0.9694	-0.8043	0.6528	0.9982
hsa-miR-329-5p	0	0	0	0	0	0	0	0	0	81	10	0	0	0	0	0	0	0	0	0	0	0	0	0	0	0	0	128.7	5.1	0	0	0	0	0	0	0	0.3				-5.2194			-0.8043	0.6528	0.9982
hsa-miR-4433a-3p	0	0	0	0	0	0	0	0	0	2	6	0	0	0	0	0	0	0	0	0	0	0	0	0	0	0	0	3.2	3	0	0	0	0	0	0	0	0.3				-1.8255	0.335	0.9694	-0.7637	0.6693	0.9982
hsa-miR-193a-3p	0	0	0	0	0	0	0	0	0	0	9	0	0	0	0	0	0	0	0	0	0	0	0	0	0	0	0	0	4.6	0	0	0	0	0	0	0	0.3				-1.6151	0.3942	0.9694	-0.7428	0.6778	0.9982
hsa-miR-3130-3p	0	0	0	0	0	0	0	0	0	0	9	0	0	0	0	0	0	0	0	0	0	0	0	0	0	0	0	0	4.6	0	0	0	0	0	0	0	0.3				-1.6151	0.3942	0.9694	-0.7428	0.6778	0.9982
hsa-miR-3140-3p	0	0	0	0	0	0	0	0	0	0	9	0	0	0	0	0	0	0	0	0	0	0	0	0	0	0	0	0	4.6	0	0	0	0	0	0	0	0.3				-1.6151	0.3942	0.9694	-0.7428	0.6778	0.9982
hsa-miR-3150b-3p	0	0	0	0	0	0	0	0	0	0	9	0	0	0	0	0	0	0	0	0	0	0	0	0	0	0	0	0	4.6	0	0	0	0	0	0	0	0.3				-1.6151	0.3942	0.9694	-0.7428	0.6778	0.9982
hsa-miR-627-5p	0	0	0	0	0	0	0	0	0	0	9	0	0	0	0	0	0	0	0	0	0	0	0	0	0	0	0	0	4.6	0	0	0	0	0	0	0	0.3				-1.6151	0.3942	0.9694	-0.7428	0.6778	0.9982
hsa-miR-6509-3p	0	0	0	0	0	0	0	0	0	0	9	0	0	0	0	0	0	0	0	0	0	0	0	0	0	0	0	0	4.6	0	0	0	0	0	0	0	0.3				-1.6151	0.3942	0.9694	-0.7428	0.6778	0.9982
hsa-miR-6857-3p	0	0	0	0	0	0	0	0	0	0	9	0	0	0	0	0	0	0	0	0	0	0	0	0	0	0	0	0	4.6	0	0	0	0	0	0	0	0.3				-1.6151	0.3942	0.9694	-0.7428	0.6778	0.9982
hsa-miR-11401	0	0	0	0	0	0	0	0	0	0	8	0	0	0	0	0	0	0	0	0	0	0	0	0	0	0	0	0	4.1	0	0	0	0	0	0	0	0.2				-1.5071	0.4268	0.9694	-0.6756	0.7056	0.9982
hsa-miR-3125	0	0	0	0	0	0	0	0	0	0	8	0	0	0	0	0	0	0	0	0	0	0	0	0	0	0	0	0	4.1	0	0	0	0	0	0	0	0.2				-1.5071	0.4268	0.9694	-0.6756	0.7056	0.9982
hsa-miR-517c-3p	0	0	0	0	0	0	0	0	0	0	8	0	0	0	0	0	0	0	0	0	0	0	0	0	0	0	0	0	4.1	0	0	0	0	0	0	0	0.2				-1.5071	0.4268	0.9694	-0.6756	0.7056	0.9982
hsa-miR-548ab	0	0	0	0	0	0	0	0	0	0	8	0	0	0	0	0	0	0	0	0	0	0	0	0	0	0	0	0	4.1	0	0	0	0	0	0	0	0.2				-1.5071	0.4268	0.9694	-0.6756	0.7056	0.9982
hsa-miR-5193	0	0	0	0	0	0	0	24	0	0	7	0	0	0	0	0	0	0	0	0	0	0	0	0	0	24.9	0	0	3.5	0	0	0	0	0	0	0	0.2				-3.3174	0.0785	0.9694	-0.6038	0.7356	0.9982
hsa-miR-1225-5p	0	0	0	0	0	0	0	0	0	0	7	0	0	0	0	0	0	0	0	0	0	0	0	0	0	0	0	0	3.5	0	0	0	0	0	0	0	0.2				-1.3962	0.4618	0.9694	-0.6038	0.7356	0.9982
hsa-miR-1910-5p	0	0	0	0	0	0	0	0	0	0	7	0	0	0	0	0	0	0	0	0	0	0	0	0	0	0	0	0	3.5	0	0	0	0	0	0	0	0.2				-1.3962	0.4618	0.9694	-0.6038	0.7356	0.9982
hsa-miR-548ay-3p	0	0	0	0	0	0	0	0	0	0	7	0	0	0	0	0	0	0	0	0	0	0	0	0	0	0	0	0	3.5	0	0	0	0	0	0	0	0.2				-1.3962	0.4618	0.9694	-0.6038	0.7356	0.9982
hsa-miR-708-3p	0	0	0	0	0	0	0	0	0	0	7	0	0	0	0	0	0	0	0	0	0	0	0	0	0	0	0	0	3.5	0	0	0	0	0	0	0	0.2				-1.3962	0.4618	0.9694	-0.6038	0.7356	0.9982
hsa-miR-7106-3p	0	0	0	0	0	0	0	0	0	0	7	0	0	0	0	0	0	0	0	0	0	0	0	0	0	0	0	0	3.5	0	0	0	0	0	0	0	0.2				-1.3962	0.4618	0.9694	-0.6038	0.7356	0.9982
hsa-miR-412-5p	0	0	0	0	0	0	0	0	0	34	7	0	0	0	0	0	0	0	0	0	0	0	0	0	0	0	0	54	3.5	0	0	0	0	0	0	0	0.2				-3.9384			-0.6038	0.7356	0.9982
hsa-miR-3180-3p	0	0	0	0	0	0	0	0	0	0	6	0	0	0	0	0	0	0	0	0	0	0	0	0	0	0	0	0	3	0	0	0	0	0	0	0	0.2				-1.2721	0.5028	0.9694	-0.5266	0.7684	0.9982
hsa-miR-4769-3p	0	0	0	0	0	0	0	0	0	0	6	0	0	0	0	0	0	0	0	0	0	0	0	0	0	0	0	0	3	0	0	0	0	0	0	0	0.2				-1.2721	0.5028	0.9694	-0.5266	0.7684	0.9982
hsa-miR-6732-3p	0	0	0	0	0	0	0	0	0	0	6	0	0	0	0	0	0	0	0	0	0	0	0	0	0	0	0	0	3	0	0	0	0	0	0	0	0.2				-1.2721	0.5028	0.9694	-0.5266	0.7684	0.9982
hsa-miR-6747-3p	0	0	0	0	0	0	0	0	0	0	6	0	0	0	0	0	0	0	0	0	0	0	0	0	0	0	0	0	3	0	0	0	0	0	0	0	0.2				-1.2721	0.5028	0.9694	-0.5266	0.7684	0.9982
hsa-miR-6783-3p	0	0	0	0	0	0	0	0	0	0	6	0	0	0	0	0	0	0	0	0	0	0	0	0	0	0	0	0	3	0	0	0	0	0	0	0	0.2				-1.2721	0.5028	0.9694	-0.5266	0.7684	0.9982
hsa-miR-1292-3p	0	0	0	0	0	0	0	0	0	0	5	0	0	0	0	0	0	0	0	0	0	0	0	0	0	0	0	0	2.5	0	0	0	0	0	0	0	0.1				-1.1361	0.5497	0.9694	-0.4447	0.8036	0.9982
hsa-miR-5004-3p	0	0	0	0	0	0	0	0	0	0	5	0	0	0	0	0	0	0	0	0	0	0	0	0	0	0	0	0	2.5	0	0	0	0	0	0	0	0.1				-1.1361	0.5497	0.9694	-0.4447	0.8036	0.9982
hsa-miR-522-3p	0	0	0	0	0	0	0	0	0	0	5	0	0	0	0	0	0	0	0	0	0	0	0	0	0	0	0	0	2.5	0	0	0	0	0	0	0	0.1				-1.1361	0.5497	0.9694	-0.4447	0.8036	0.9982
hsa-miR-6807-5p	0	0	0	0	0	0	0	0	0	0	5	0	0	0	0	0	0	0	0	0	0	0	0	0	0	0	0	0	2.5	0	0	0	0	0	0	0	0.1				-1.1361	0.5497	0.9694	-0.4447	0.8036	0.9982
hsa-miR-935	0	0	0	0	0	0	0	0	0	0	5	0	0	0	0	0	0	0	0	0	0	0	0	0	0	0	0	0	2.5	0	0	0	0	0	0	0	0.1				-1.1361	0.5497	0.9694	-0.4447	0.8036	0.9982
hsa-miR-6763-5p	0	0	0	0	0	0	0	0	0	4	0	0	0	0	0	0	0	0	0	0	0	0	0	0	0	0	0	6.4	0	0	0	0	0	0	0	0	0.4				-1.7618	0.3523	0.9694	-0.436	0.8074	0.9982
hsa-miR-378a-5p	0	0	0	0	0	0	0	0	21	0	4	0	0	0	0	0	0	0	0	0	0	0	0	0	0	0	24.9	0	2	0	0	0	0	0	0	0	0.1				-3.2426	0.0856	0.9694	-0.3532	0.8435	0.9982
hsa-miR-3187-3p	0	0	0	0	0	0	0	0	0	16	4	0	0	0	0	0	0	0	0	0	0	0	0	0	0	0	0	25.4	2	0	0	0	0	0	0	0	0.1				-3.212	0.0886	0.9694	-0.3532	0.8435	0.9982
hsa-miR-1285-5p	0	0	0	0	0	0	0	0	0	0	4	0	0	0	0	0	0	0	0	0	0	0	0	0	0	0	0	0	2	0	0	0	0	0	0	0	0.1				-0.9918	0.6016	0.9694	-0.3532	0.8435	0.9982
hsa-miR-3065-3p	0	0	0	0	0	0	0	0	0	0	4	0	0	0	0	0	0	0	0	0	0	0	0	0	0	0	0	0	2	0	0	0	0	0	0	0	0.1				-0.9918	0.6016	0.9694	-0.3532	0.8435	0.9982
hsa-miR-3180	0	0	0	0	0	0	0	0	0	0	4	0	0	0	0	0	0	0	0	0	0	0	0	0	0	0	0	0	2	0	0	0	0	0	0	0	0.1				-0.9918	0.6016	0.9694	-0.3532	0.8435	0.9982
hsa-miR-3194-5p	0	0	0	0	0	0	0	0	0	0	4	0	0	0	0	0	0	0	0	0	0	0	0	0	0	0	0	0	2	0	0	0	0	0	0	0	0.1				-0.9918	0.6016	0.9694	-0.3532	0.8435	0.9982
hsa-miR-34b-3p	0	0	0	0	0	0	0	0	0	0	4	0	0	0	0	0	0	0	0	0	0	0	0	0	0	0	0	0	2	0	0	0	0	0	0	0	0.1				-0.9918	0.6016	0.9694	-0.3532	0.8435	0.9982
hsa-miR-3611	0	0	0	0	0	0	0	0	0	0	4	0	0	0	0	0	0	0	0	0	0	0	0	0	0	0	0	0	2	0	0	0	0	0	0	0	0.1				-0.9918	0.6016	0.9694	-0.3532	0.8435	0.9982
hsa-miR-4787-3p	0	0	0	0	0	0	0	0	0	0	4	0	0	0	0	0	0	0	0	0	0	0	0	0	0	0	0	0	2	0	0	0	0	0	0	0	0.1				-0.9918	0.6016	0.9694	-0.3532	0.8435	0.9982
hsa-miR-4800-3p	0	0	0	0	0	0	0	0	0	0	4	0	0	0	0	0	0	0	0	0	0	0	0	0	0	0	0	0	2	0	0	0	0	0	0	0	0.1				-0.9918	0.6016	0.9694	-0.3532	0.8435	0.9982
hsa-miR-6514-3p	0	0	0	0	0	0	0	0	0	0	4	0	0	0	0	0	0	0	0	0	0	0	0	0	0	0	0	0	2	0	0	0	0	0	0	0	0.1				-0.9918	0.6016	0.9694	-0.3532	0.8435	0.9982
hsa-miR-6789-5p	0	0	0	0	0	0	0	0	0	0	4	0	0	0	0	0	0	0	0	0	0	0	0	0	0	0	0	0	2	0	0	0	0	0	0	0	0.1				-0.9918	0.6016	0.9694	-0.3532	0.8435	0.9982
hsa-miR-6817-3p	0	0	0	0	0	0	0	0	0	0	4	0	0	0	0	0	0	0	0	0	0	0	0	0	0	0	0	0	2	0	0	0	0	0	0	0	0.1				-0.9918	0.6016	0.9694	-0.3532	0.8435	0.9982
hsa-miR-4533	0	0	0	0	0	0	0	43	0	0	4	0	0	0	0	0	0	0	0	0	0	0	0	0	0	44.7	0	0	2	0	0	0	0	0	0	0	0.1				-3.7952			-0.3532	0.8435	0.9982
hsa-miR-2115-5p	0	0	0	0	0	0	0	25	0	0	4	0	0	0	0	0	0	0	0	0	0	0	0	0	0	26	0	0	2	0	0	0	0	0	0	0	0.1				-3.2991			-0.3532	0.8435	0.9982
hsa-miR-137-5p	0	0	0	0	0	0	0	0	0	0	3	0	0	0	0	0	0	0	0	0	0	0	0	0	0	0	0	0	1.5	0	0	0	0	0	0	0	0.1				-0.8241	0.6645	0.9694	-0.2484	0.8896	0.9982
hsa-miR-147b-5p	0	0	0	0	0	0	0	0	0	0	3	0	0	0	0	0	0	0	0	0	0	0	0	0	0	0	0	0	1.5	0	0	0	0	0	0	0	0.1				-0.8241	0.6645	0.9694	-0.2484	0.8896	0.9982
hsa-miR-412-3p	0	0	0	0	0	0	0	0	0	0	3	0	0	0	0	0	0	0	0	0	0	0	0	0	0	0	0	0	1.5	0	0	0	0	0	0	0	0.1				-0.8241	0.6645	0.9694	-0.2484	0.8896	0.9982
hsa-miR-500a-5p	0	0	0	0	0	0	0	0	0	0	3	0	0	0	0	0	0	0	0	0	0	0	0	0	0	0	0	0	1.5	0	0	0	0	0	0	0	0.1				-0.8241	0.6645	0.9694	-0.2484	0.8896	0.9982
hsa-miR-500b-5p	0	0	0	0	0	0	0	0	0	0	3	0	0	0	0	0	0	0	0	0	0	0	0	0	0	0	0	0	1.5	0	0	0	0	0	0	0	0.1				-0.8241	0.6645	0.9694	-0.2484	0.8896	0.9982
hsa-miR-605-3p	0	0	0	0	0	0	0	0	0	0	3	0	0	0	0	0	0	0	0	0	0	0	0	0	0	0	0	0	1.5	0	0	0	0	0	0	0	0.1				-0.8241	0.6645	0.9694	-0.2484	0.8896	0.9982
hsa-miR-6513-5p	0	0	0	0	0	0	0	0	0	0	3	0	0	0	0	0	0	0	0	0	0	0	0	0	0	0	0	0	1.5	0	0	0	0	0	0	0	0.1				-0.8241	0.6645	0.9694	-0.2484	0.8896	0.9982
hsa-miR-6514-5p	0	0	0	0	0	0	0	0	0	0	3	0	0	0	0	0	0	0	0	0	0	0	0	0	0	0	0	0	1.5	0	0	0	0	0	0	0	0.1				-0.8241	0.6645	0.9694	-0.2484	0.8896	0.9982
hsa-miR-6755-5p	0	0	0	0	0	0	0	0	0	0	3	0	0	0	0	0	0	0	0	0	0	0	0	0	0	0	0	0	1.5	0	0	0	0	0	0	0	0.1				-0.8241	0.6645	0.9694	-0.2484	0.8896	0.9982
hsa-miR-6782-3p	0	0	0	0	0	0	0	0	0	0	3	0	0	0	0	0	0	0	0	0	0	0	0	0	0	0	0	0	1.5	0	0	0	0	0	0	0	0.1				-0.8241	0.6645	0.9694	-0.2484	0.8896	0.9982
hsa-miR-940	0	0	0	0	0	0	0	0	0	0	3	0	0	0	0	0	0	0	0	0	0	0	0	0	0	0	0	0	1.5	0	0	0	0	0	0	0	0.1				-0.8241	0.6645	0.9694	-0.2484	0.8896	0.9982
hsa-miR-129-1-3p	0	0	0	0	0	0	0	0	0	0	2	0	0	0	0	0	0	0	0	0	0	0	0	0	0	0	0	0	1	0	0	0	0	0	0	0	0.1				-0.6115	0.7477	0.9694	-0.1092	0.9513	0.9982
hsa-miR-129-2-3p	0	0	0	0	0	0	0	0	0	0	2	0	0	0	0	0	0	0	0	0	0	0	0	0	0	0	0	0	1	0	0	0	0	0	0	0	0.1				-0.6115	0.7477	0.9694	-0.1092	0.9513	0.9982
hsa-miR-3176	0	0	0	0	0	0	0	0	0	0	2	0	0	0	0	0	0	0	0	0	0	0	0	0	0	0	0	0	1	0	0	0	0	0	0	0	0.1				-0.6115	0.7477	0.9694	-0.1092	0.9513	0.9982
hsa-miR-3192-5p	0	0	0	0	0	0	0	0	0	0	2	0	0	0	0	0	0	0	0	0	0	0	0	0	0	0	0	0	1	0	0	0	0	0	0	0	0.1				-0.6115	0.7477	0.9694	-0.1092	0.9513	0.9982
hsa-miR-3692-3p	0	0	0	0	0	0	0	0	0	0	2	0	0	0	0	0	0	0	0	0	0	0	0	0	0	0	0	0	1	0	0	0	0	0	0	0	0.1				-0.6115	0.7477	0.9694	-0.1092	0.9513	0.9982
hsa-miR-4762-5p	0	0	0	0	0	0	0	0	0	0	2	0	0	0	0	0	0	0	0	0	0	0	0	0	0	0	0	0	1	0	0	0	0	0	0	0	0.1				-0.6115	0.7477	0.9694	-0.1092	0.9513	0.9982
hsa-miR-6866-3p	0	0	0	0	0	0	0	0	0	0	2	0	0	0	0	0	0	0	0	0	0	0	0	0	0	0	0	0	1	0	0	0	0	0	0	0	0.1				-0.6115	0.7477	0.9694	-0.1092	0.9513	0.9982
hsa-miR-942-3p	0	0	0	0	0	0	0	0	0	0	2	0	0	0	0	0	0	0	0	0	0	0	0	0	0	0	0	0	1	0	0	0	0	0	0	0	0.1				-0.6115	0.7477	0.9694	-0.1092	0.9513	0.9982
hsa-miR-1255a	0	0	0	0	0	0	0	0	0	1	0	0	0	0	0	0	0	0	0	0	0	0	0	0	0	0	0	1.6	0	0	0	0	0	0	0	0	0.1				-0.332	0.8614	0.9694	0.0412	0.9816	0.9982
hsa-miR-3159	0	0	0	0	0	0	0	0	0	1	0	0	0	0	0	0	0	0	0	0	0	0	0	0	0	0	0	1.6	0	0	0	0	0	0	0	0	0.1				-0.332	0.8614	0.9694	0.0412	0.9816	0.9982
hsa-miR-5698	0	0	0	0	0	0	0	1	0	0	0	0	0	0	0	0	0	0	0	0	0	0	0	0	0	1	0	0	0	0	0	0	0	0	0	0	0.1				-0.332	0.8614	0.9694	0.0412	0.9816	0.9982
hsa-let-7g-3p	0	0	0	0	0	0	0	0	0	0	1	0	0	0	0	0	0	0	0	0	0	0	0	0	0	0	0	0	0.5	0	0	0	0	0	0	0	0				-0.3184	0.867	0.9694	0.0412	0.9816	0.9982
hsa-miR-136-5p	0	0	0	0	0	0	0	0	0	0	1	0	0	0	0	0	0	0	0	0	0	0	0	0	0	0	0	0	0.5	0	0	0	0	0	0	0	0				-0.3184	0.867	0.9694	0.0412	0.9816	0.9982
hsa-miR-222-5p	0	0	0	0	0	0	0	0	0	0	1	0	0	0	0	0	0	0	0	0	0	0	0	0	0	0	0	0	0.5	0	0	0	0	0	0	0	0				-0.3184	0.867	0.9694	0.0412	0.9816	0.9982
hsa-miR-2277-5p	0	0	0	0	0	0	0	0	0	0	1	0	0	0	0	0	0	0	0	0	0	0	0	0	0	0	0	0	0.5	0	0	0	0	0	0	0	0				-0.3184	0.867	0.9694	0.0412	0.9816	0.9982
hsa-miR-299-5p	0	0	0	0	0	0	0	0	0	0	1	0	0	0	0	0	0	0	0	0	0	0	0	0	0	0	0	0	0.5	0	0	0	0	0	0	0	0				-0.3184	0.867	0.9694	0.0412	0.9816	0.9982
hsa-miR-365b-5p	0	0	0	0	0	0	0	0	0	0	1	0	0	0	0	0	0	0	0	0	0	0	0	0	0	0	0	0	0.5	0	0	0	0	0	0	0	0				-0.3184	0.867	0.9694	0.0412	0.9816	0.9982
hsa-miR-4635	0	0	0	0	0	0	0	0	0	0	1	0	0	0	0	0	0	0	0	0	0	0	0	0	0	0	0	0	0.5	0	0	0	0	0	0	0	0				-0.3184	0.867	0.9694	0.0412	0.9816	0.9982
hsa-miR-4796-5p	0	0	0	0	0	0	0	0	0	0	1	0	0	0	0	0	0	0	0	0	0	0	0	0	0	0	0	0	0.5	0	0	0	0	0	0	0	0				-0.3184	0.867	0.9694	0.0412	0.9816	0.9982
hsa-miR-548ah-3p	0	0	0	0	0	0	0	0	0	0	1	0	0	0	0	0	0	0	0	0	0	0	0	0	0	0	0	0	0.5	0	0	0	0	0	0	0	0				-0.3184	0.867	0.9694	0.0412	0.9816	0.9982
hsa-miR-548am-3p	0	0	0	0	0	0	0	0	0	0	1	0	0	0	0	0	0	0	0	0	0	0	0	0	0	0	0	0	0.5	0	0	0	0	0	0	0	0				-0.3184	0.867	0.9694	0.0412	0.9816	0.9982
hsa-miR-548j-3p	0	0	0	0	0	0	0	0	0	0	1	0	0	0	0	0	0	0	0	0	0	0	0	0	0	0	0	0	0.5	0	0	0	0	0	0	0	0				-0.3184	0.867	0.9694	0.0412	0.9816	0.9982
hsa-miR-548q	0	0	0	0	0	0	0	0	0	0	1	0	0	0	0	0	0	0	0	0	0	0	0	0	0	0	0	0	0.5	0	0	0	0	0	0	0	0				-0.3184	0.867	0.9694	0.0412	0.9816	0.9982
hsa-miR-551a	0	0	0	0	0	0	0	0	0	0	1	0	0	0	0	0	0	0	0	0	0	0	0	0	0	0	0	0	0.5	0	0	0	0	0	0	0	0				-0.3184	0.867	0.9694	0.0412	0.9816	0.9982
hsa-miR-659-5p	0	0	0	0	0	0	0	0	0	0	1	0	0	0	0	0	0	0	0	0	0	0	0	0	0	0	0	0	0.5	0	0	0	0	0	0	0	0				-0.3184	0.867	0.9694	0.0412	0.9816	0.9982
hsa-miR-6727-3p	0	0	0	0	0	0	0	0	0	0	1	0	0	0	0	0	0	0	0	0	0	0	0	0	0	0	0	0	0.5	0	0	0	0	0	0	0	0				-0.3184	0.867	0.9694	0.0412	0.9816	0.9982
hsa-miR-6802-3p	0	0	0	0	0	0	0	0	0	0	1	0	0	0	0	0	0	0	0	0	0	0	0	0	0	0	0	0	0.5	0	0	0	0	0	0	0	0				-0.3184	0.867	0.9694	0.0412	0.9816	0.9982
hsa-miR-6810-5p	0	0	0	0	0	0	0	0	0	0	1	0	0	0	0	0	0	0	0	0	0	0	0	0	0	0	0	0	0.5	0	0	0	0	0	0	0	0				-0.3184	0.867	0.9694	0.0412	0.9816	0.9982
hsa-miR-6832-3p	0	0	0	0	0	0	0	0	0	0	1	0	0	0	0	0	0	0	0	0	0	0	0	0	0	0	0	0	0.5	0	0	0	0	0	0	0	0				-0.3184	0.867	0.9694	0.0412	0.9816	0.9982
hsa-miR-3622a-5p	0	0	0	0	0	0	0	0	0	18	0	0	0	0	0	0	0	0	0	0	0	0	0	0	0	0	0	28.6	0	0	0	0	0	0	0	0	0				-3.2435	0.0855	0.9694	0	1
hsa-miR-7848-3p	0	0	0	0	0	0	0	0	0	16	0	0	0	0	0	0	0	0	0	0	0	0	0	0	0	0	0	25.4	0	0	0	0	0	0	0	0	0				-3.1284	0.0972	0.9694	0	1
hsa-miR-509-3p	0	0	0	0	0	0	0	0	0	13	0	0	0	0	0	0	0	0	0	0	0	0	0	0	0	0	0	20.7	0	0	0	0	0	0	0	0	0				-2.9256	0.1211	0.9694	0	1
hsa-miR-581	0	0	0	0	0	0	0	18	0	0	0	0	0	0	0	0	0	0	0	0	0	0	0	0	0	18.7	0	0	0	0	0	0	0	0	0	0	0				-2.9064	0.1235	0.9694	0	1
hsa-miR-3909	0	0	0	0	0	0	0	17	0	0	0	0	0	0	0	0	0	0	0	0	0	0	0	0	0	17.7	0	0	0	0	0	0	0	0	0	0	0				-2.8513	0.1309	0.9694	0	1
hsa-miR-5584-5p	0	0	0	0	0	0	0	0	0	12	0	0	0	0	0	0	0	0	0	0	0	0	0	0	0	0	0	19.1	0	0	0	0	0	0	0	0	0				-2.8475	0.1314	0.9694	0	1
hsa-miR-6809-5p	0	0	0	0	0	0	0	0	0	12	0	0	0	0	0	0	0	0	0	0	0	0	0	0	0	0	0	19.1	0	0	0	0	0	0	0	0	0				-2.8475	0.1314	0.9694	0	1
hsa-miR-6504-5p	0	0	0	0	0	0	0	0	0	0	19	0	0	0	0	0	0	0	0	0	0	0	0	0	0	0	0	0	9.6	0	0	0	0	0	0	0	0				-2.3159	0.2205	0.9694	0	1
hsa-miR-3194-3p	0	0	0	0	0	0	0	0	0	0	16	0	0	0	0	0	0	0	0	0	0	0	0	0	0	0	0	0	8.1	0	0	0	0	0	0	0	0				-2.1526	0.255	0.9694	0	1
hsa-miR-615-3p	0	0	0	0	0	0	0	0	0	0	15	0	0	0	0	0	0	0	0	0	0	0	0	0	0	0	0	0	7.6	0	0	0	0	0	0	0	0				-2.0916	0.2688	0.9694	0	1
hsa-miR-194-3p	0	0	0	0	0	0	0	0	0	0	14	0	0	0	0	0	0	0	0	0	0	0	0	0	0	0	0	0	7.1	0	0	0	0	0	0	0	0				-2.0265	0.2841	0.9694	0	1
hsa-miR-6859-5p	0	0	0	0	0	0	0	0	0	0	12	0	0	0	0	0	0	0	0	0	0	0	0	0	0	0	0	0	6.1	0	0	0	0	0	0	0	0				-1.8819	0.3202	0.9694	0	1
hsa-miR-6779-3p	0	0	0	0	0	0	0	0	132	0	0	0	0	0	0	0	0	0	0	0	0	0	0	0	0	0	156.6	0	0	0	0	0	0	0	0	0	0				-5.2517			0	1
hsa-miR-4707-3p	0	0	0	0	0	0	0	0	122	0	0	0	0	0	0	0	0	0	0	0	0	0	0	0	0	0	144.8	0	0	0	0	0	0	0	0	0	0				-5.2071			0	1
hsa-miR-4669	0	0	0	0	0	0	0	0	83	0	0	0	0	0	0	0	0	0	0	0	0	0	0	0	0	0	98.5	0	0	0	0	0	0	0	0	0	0				-4.9806			0	1
hsa-miR-4749-3p	0	0	0	0	0	0	0	78	0	0	0	0	0	0	0	0	0	0	0	0	0	0	0	0	0	81.1	0	0	0	0	0	0	0	0	0	0	0				-4.326			0	1
hsa-miR-4723-3p	0	0	0	0	0	0	0	0	59	0	0	0	0	0	0	0	0	0	0	0	0	0	0	0	0	0	70	0	0	0	0	0	0	0	0	0	0				-4.1681			0	1
hsa-miR-6858-5p	0	0	0	0	0	0	0	0	0	38	0	0	0	0	0	0	0	0	0	0	0	0	0	0	0	0	0	60.4	0	0	0	0	0	0	0	0	0				-3.9758			0	1
hsa-miR-4659b-5p	0	0	0	0	0	0	0	0	41	0	0	0	0	0	0	0	0	0	0	0	0	0	0	0	0	0	48.7	0	0	0	0	0	0	0	0	0	0				-3.8138			0	1
hsa-miR-1273h-5p	0	0	0	0	0	0	0	0	0	31	0	0	0	0	0	0	0	0	0	0	0	0	0	0	0	0	0	49.3	0	0	0	0	0	0	0	0	0				-3.7759			0	1
hsa-miR-6716-5p	0	0	0	0	0	0	0	0	0	31	0	0	0	0	0	0	0	0	0	0	0	0	0	0	0	0	0	49.3	0	0	0	0	0	0	0	0	0				-3.7759			0	1
hsa-miR-504-5p	0	0	0	0	0	0	0	0	0	23	0	0	0	0	0	0	0	0	0	0	0	0	0	0	0	0	0	36.6	0	0	0	0	0	0	0	0	0				-3.4834			0	1
hsa-miR-328-5p	0	0	0	0	0	0	0	32	0	0	0	0	0	0	0	0	0	0	0	0	0	0	0	0	0	33.3	0	0	0	0	0	0	0	0	0	0	0				-3.4631			0	1
hsa-miR-6758-5p	0	0	0	0	0	0	0	0	0	21	0	0	0	0	0	0	0	0	0	0	0	0	0	0	0	0	0	33.4	0	0	0	0	0	0	0	0	0				-3.3943			0	1
hsa-miR-4637	0	0	0	0	0	0	0	0	26	0	0	0	0	0	0	0	0	0	0	0	0	0	0	0	0	0	30.9	0	0	0	0	0	0	0	0	0	0				-3.3698			0	1
hsa-miR-4701-3p	0	0	0	0	0	0	0	27	0	0	0	0	0	0	0	0	0	0	0	0	0	0	0	0	0	28.1	0	0	0	0	0	0	0	0	0	0	0				-3.2983			0	1
hsa-miR-4489	0	0	0	0	0	0	0	26	0	0	0	0	0	0	0	0	0	0	0	0	0	0	0	0	0	27	0	0	0	0	0	0	0	0	0	0	0				-3.2617			0	1
hsa-miR-19b-1-5p	0	0	0	0	0	0	0	22	0	0	0	0	0	0	0	0	0	0	0	0	0	0	0	0	0	22.9	0	0	0	0	0	0	0	0	0	0	0				-3.1001			0	1
hsa-miR-4772-3p	0	0	0	0	0	0	0	0	0	0	29	0	0	0	0	0	0	0	0	0	0	0	0	0	0	0	0	0	14.7	0	0	0	0	0	0	0	0				-2.7171			0	1
