# Supplementary material for: Tissue-Specific miRNAs Regulate the Development of Thoracic Aortic Aneurysm: The Emerging Role of KLF4 Network
Source: J Clin Med. 2019 Oct 3;8(10):1609. doi: 10.3390/jcm8101609 (PMC6832203; doi:10.3390/jcm8101609)
Supplement: Supplementary file 1 [file jcm-08-01609-s001.zip › Supplement file 3.xls]

## Sheet: Target DataBase
miRNA	Target Gene	Target Score
hsa-miR-1-3p	BDNF	8.37
hsa-miR-1-3p	TAGLN2	8.1806
hsa-miR-1-3p	POGK	8.074
hsa-miR-148a-3p	RPS6KA5	8.0091
hsa-miR-150-5p	MYB	7.9878
hsa-miR-1-3p	PAX3	7.9285
hsa-miR-1-3p	GJA1	7.6805
hsa-miR-155-5p	BACH1	7.5567
hsa-miR-9-3p	ITGB1	7.5492
hsa-miR-148a-3p	ACVR1	7.5417
hsa-miR-146a-5p	TRAF6	7.5292
hsa-miR-148a-3p	S1PR1	7.5118
hsa-miR-146a-5p	IRAK1	7.5075
hsa-miR-1-3p	SPRED1	7.4947
hsa-miR-1-3p	FRS2	7.4869
hsa-miR-150-5p	ZEB1	7.4772
hsa-miR-10b-5p	NCOR2	7.4617
hsa-miR-10a-5p	NCOR2	7.4568
hsa-miR-542-3p	BIRC5	7.4113
hsa-miR-1-3p	ETS1	7.3607
hsa-miR-542-3p	ILK	7.3452
hsa-miR-1-3p	TMSB4X	7.3314
hsa-miR-155-5p	HIVEP2	7.2778
hsa-miR-1-3p	TWF1	7.272
hsa-miR-150-5p	EGR2	7.2662
hsa-miR-155-5p	ARID2	7.2635
hsa-miR-10a-5p	MAP3K7	7.2626
hsa-miR-148a-3p	CCKBR	7.2574
hsa-miR-139-5p	NR5A2	7.2464
hsa-miR-1-3p	HSPD1	7.2455
hsa-miR-148a-3p	TMED7	7.2395
hsa-miR-155-5p	TSHZ3	7.2182
hsa-miR-1-3p	KIF2A	7.2132
hsa-miR-1-3p	CNN3	7.1751
hsa-miR-148a-3p	MAFB	7.1708
hsa-miR-146a-5p	NUMB	7.1559
hsa-miR-1-3p	YWHAZ	7.1488
hsa-miR-1-3p	FN1	7.1311
hsa-miR-99a-5p	FGFR3	7.1138
hsa-miR-10b-5p	SDC1	7.1131
hsa-miR-155-5p	ZIC3	7.1114
hsa-miR-99a-5p	MTOR	7.0803
hsa-miR-1-3p	FOXP1	7.0718
hsa-miR-148a-3p	ITGA5	7.0716
hsa-miR-148a-3p	DNMT1	7.0605
hsa-miR-199b-5p	CCNL1	7.0522
hsa-miR-199b-5p	HIF1A	7.0516
hsa-miR-199b-5p	PODXL	7.0487
hsa-miR-1-3p	PGM2	7.0269
hsa-miR-1-3p	ANXA2	7.0208
hsa-miR-155-5p	JARID2	7.0206
hsa-miR-10b-5p	TFAP2C	7.0076
hsa-miR-139-5p	FOS	6.979
hsa-miR-155-5p	FAM135A	6.9744
hsa-miR-21-5p	YOD1	6.9636
hsa-miR-155-5p	LCORL	6.9552
hsa-miR-1-3p	G6PD	6.952
hsa-miR-148a-3p	WNT10B	6.8922
hsa-miR-1-3p	NETO2	6.8866
hsa-miR-1-3p	SLC8A1	6.874
hsa-miR-155-5p	RNF123	6.8634
hsa-miR-155-5p	ETS1	6.8563
hsa-miR-21-5p	TIAM1	6.8474
hsa-miR-1-3p	EDN1	6.8466
hsa-miR-21-5p	SATB1	6.8054
hsa-miR-155-5p	WEE1	6.7998
hsa-miR-155-5p	SDCBP	6.796
hsa-miR-21-5p	TGFBI	6.762
hsa-miR-155-5p	GABARAPL1	6.7486
hsa-miR-10b-5p	NR4A3	6.7457
hsa-miR-155-5p	PICALM	6.7375
hsa-miR-155-5p	JADE1	6.7323
hsa-miR-148a-3p	PBXIP1	6.7208
hsa-miR-155-5p	RAB11FIP2	6.7143
hsa-miR-148a-3p	TGIF2	6.7084
hsa-miR-155-5p	TAF5L	6.7048
hsa-miR-133a-3p	TAGLN2	6.6853
hsa-miR-148a-3p	ROCK1	6.6839
hsa-miR-1-3p	LASP1	6.6732
hsa-miR-1-3p	TKT	6.6589
hsa-miR-146a-5p	PRKCE	6.6567
hsa-miR-155-5p	CARHSP1	6.6486
hsa-miR-146a-5p	CCL5	6.6448
hsa-miR-21-5p	STAT3	6.6387
hsa-miR-133a-3p	LASP1	6.6249
hsa-miR-150-5p	CBL	6.6209
hsa-miR-155-5p	ZNF652	6.5994
hsa-miR-21-5p	PCBP1	6.5984
hsa-miR-21-5p	FASLG	6.5966
hsa-miR-10a-5p	HOXA1	6.5858
hsa-miR-1-3p	SERP1	6.5642
hsa-miR-21-5p	NFIB	6.5454
hsa-miR-99a-5p	RAVER2	6.5421
hsa-miR-148a-3p	BCL2L11	6.5292
hsa-miR-21-5p	WWP1	6.5268
hsa-miR-1-3p	MET	6.521
hsa-miR-148a-3p	ERRFI1	6.5104
hsa-miR-155-5p	UBQLN1	6.5101
hsa-miR-142-3p	TAB2	6.5094
hsa-miR-155-5p	PALD1	6.4992
hsa-miR-21-5p	NTF3	6.4957
hsa-miR-155-5p	RAPGEF2	6.485
hsa-miR-21-5p	TIMP3	6.4732
hsa-miR-199b-5p	NLK	6.4719
hsa-miR-155-5p	CEBPB	6.4676
hsa-miR-155-5p	LRIF1	6.4676
hsa-miR-99a-5p	SMARCA5	6.4525
hsa-miR-199b-5p	TAF9B	6.4519
hsa-miR-142-3p	ARNTL	6.4393
hsa-miR-199b-5p	DDR1	6.4369
hsa-miR-155-5p	WWC1	6.4338
hsa-miR-155-5p	SMARCA4	6.4312
hsa-miR-139-5p	CXCR4	6.412
hsa-miR-1-3p	ADAR	6.401
hsa-miR-133a-3p	SGMS2	6.3964
hsa-miR-155-5p	KRAS	6.363
hsa-miR-155-5p	TLE4	6.356
hsa-miR-133a-3p	RFFL	6.3354
hsa-miR-155-5p	HBP1	6.3314
hsa-miR-99a-5p	CTDSPL	6.331
hsa-miR-99a-5p	TRIB2	6.3232
hsa-miR-133a-3p	UBA2	6.3129
hsa-miR-133a-3p	VKORC1	6.3116
hsa-miR-155-5p	MPP5	6.3038
hsa-miR-199b-5p	GRB10	6.2874
hsa-miR-21-5p	RECK	6.287
hsa-miR-142-3p	CCNT2	6.2835
hsa-miR-148a-3p	CDK19	6.2757
hsa-miR-155-5p	TP53INP1	6.2299
hsa-miR-21-5p	CDK2AP1	6.2092
hsa-miR-146a-5p	COPS8	6.1673
hsa-miR-155-5p	MASTL	6.1591
hsa-miR-99a-5p	MTMR3	6.1381
hsa-miR-99a-5p	HOXA1	6.1294
hsa-miR-155-5p	MYB	6.1225
hsa-miR-139-5p	JUN	6.1101
hsa-miR-133a-3p	EGFR	6.1044
hsa-miR-148a-3p	SOS2	6.093
hsa-miR-1-3p	API5	6.08
hsa-miR-10b-5p	MAPRE1	6.076
hsa-miR-133a-3p	FTL	6.0724
hsa-miR-155-5p	RBAK	6.0558
hsa-miR-1-3p	E2F5	6.0477
hsa-miR-155-5p	KLHL5	6.0419
hsa-miR-155-5p	CSF1R	6.0348
hsa-miR-155-5p	IKBKE	6.0269
hsa-miR-146a-5p	CDKN3	6.0266
hsa-miR-155-5p	ZNF28	6.0095
hsa-miR-148a-3p	ARL8B	6.0043
hsa-miR-155-5p	PKN2	6.0031
hsa-miR-150-5p	MUC4	5.9979
hsa-miR-150-5p	TP53	5.9956
hsa-miR-126-5p	ADAM9	5.9888
hsa-miR-21-5p	NFIA	5.9641
hsa-miR-1-3p	MYOCD	5.9614
hsa-miR-21-5p	MSH2	5.9577
hsa-miR-146a-5p	CFH	5.9563
hsa-miR-155-5p	TRIP13	5.9455
hsa-miR-21-5p	RASGRP1	5.9417
hsa-miR-155-5p	PDLIM5	5.933
hsa-miR-1-3p	ARCN1	5.9047
hsa-miR-21-5p	SOX5	5.8984
hsa-miR-10b-5p	TIAM1	5.898
hsa-miR-155-5p	RAC1	5.8945
hsa-miR-1-3p	CDK14	5.8897
hsa-miR-21-5p	SMAD7	5.8775
hsa-miR-142-3p	TGFBR1	5.8772
hsa-miR-155-5p	MBNL3	5.8718
hsa-miR-1-3p	HACD3	5.8477
hsa-miR-155-5p	CSNK1A1	5.8442
hsa-miR-155-5p	DHX40	5.8407
hsa-miR-139-5p	TNPO1	5.8219
hsa-miR-1-3p	SLC44A1	5.8092
hsa-miR-142-3p	PTPN23	5.8065
hsa-miR-155-5p	TAB2	5.8051
hsa-miR-155-5p	DET1	5.8045
hsa-miR-1-3p	XPO6	5.7978
hsa-miR-155-5p	PCDH9	5.7832
hsa-miR-21-5p	CCL20	5.7819
hsa-miR-146a-5p	CARD10	5.777
hsa-miR-155-5p	FAR1	5.7727
hsa-miR-21-5p	SPRY2	5.7699
hsa-miR-155-5p	KBTBD2	5.7689
hsa-miR-150-5p	MBD6	5.7611
hsa-miR-126-5p	TRIM8	5.7606
hsa-miR-1-3p	FZD7	5.7577
hsa-miR-10a-5p	CHL1	5.7439
hsa-miR-21-5p	PDCD4	5.7324
hsa-miR-155-5p	NARS	5.7269
hsa-miR-1-3p	ASPH	5.6798
hsa-miR-155-5p	MEIS1	5.6733
hsa-miR-21-5p	JAG1	5.6728
hsa-miR-155-5p	ZNF83	5.6719
hsa-miR-155-5p	HAL	5.6654
hsa-miR-146a-5p	MTA2	5.6617
hsa-miR-21-5p	MEF2C	5.6592
hsa-miR-9-3p	GNAI1	5.6558
hsa-miR-155-5p	ZNF254	5.6521
hsa-miR-139-5p	LCOR	5.6484
hsa-miR-155-5p	TERF1	5.6459
hsa-miR-155-5p	NOVA1	5.6376
hsa-miR-1-3p	ANKRD29	5.6362
hsa-miR-1-3p	UST	5.6275
hsa-miR-155-5p	MCM8	5.6216
hsa-miR-150-5p	HILPDA	5.6124
hsa-miR-155-5p	FAM199X	5.6076
hsa-miR-1-3p	YWHAQ	5.5872
hsa-miR-21-5p	RTN4	5.5807
hsa-miR-21-5p	IL1B	5.5727
hsa-miR-155-5p	CAB39	5.57
hsa-miR-155-5p	SOCS1	5.567
hsa-miR-155-5p	PKIA	5.5588
hsa-miR-155-5p	MAP3K10	5.555
hsa-miR-1-3p	MON2	5.5527
hsa-miR-148a-3p	DDX6	5.5278
hsa-miR-10a-5p	LCA5	5.5242
hsa-miR-150-5p	ADIPOR2	5.5227
hsa-miR-155-5p	TOMM20	5.5193
hsa-miR-155-5p	WBP1L	5.5174
hsa-miR-9-3p	YOD1	5.5148
hsa-miR-155-5p	HERC4	5.5139
hsa-miR-99a-5p	AGO2	5.5067
hsa-miR-146a-5p	RAC1	5.4975
hsa-miR-155-5p	MYO1D	5.4968
hsa-miR-1-3p	CLTC	5.4891
hsa-miR-139-5p	ZBTB34	5.4864
hsa-miR-142-3p	APC	5.4856
hsa-miR-133a-3p	SNX30	5.4823
hsa-miR-1-3p	SMIM14	5.482
hsa-miR-148a-3p	USP4	5.4801
hsa-miR-1-3p	GPD2	5.4647
hsa-miR-1-3p	CLCN3	5.4559
hsa-miR-133a-3p	RGS3	5.4522
hsa-miR-155-5p	JCHAIN	5.4522
hsa-miR-148a-3p	GLRX5	5.4427
hsa-miR-148a-3p	NPTX1	5.4414
hsa-miR-155-5p	FAM91A1	5.4372
hsa-miR-1-3p	DDX5	5.4363
hsa-miR-155-5p	CLUAP1	5.4331
hsa-miR-1-3p	TRIM2	5.431
hsa-miR-155-5p	NKX3-1	5.4301
hsa-miR-155-5p	FOXO3	5.4286
hsa-miR-155-5p	SPI1	5.4251
hsa-miR-1-3p	NXT2	5.4223
hsa-miR-148a-3p	RAB34	5.4194
hsa-miR-99a-5p	FKBP5	5.4175
hsa-miR-155-5p	MYLK	5.4123
hsa-miR-199b-5p	ZNF440	5.4108
hsa-miR-155-5p	ZNF561	5.3998
hsa-miR-155-5p	LRRC59	5.3978
hsa-miR-10a-5p	SRSF1	5.3908
hsa-miR-1-3p	TMCC1	5.3841
hsa-miR-10b-5p	SRSF1	5.3824
hsa-miR-155-5p	CEP83	5.3544
hsa-miR-155-5p	MEF2A	5.351
hsa-miR-139-5p	UHMK1	5.3496
hsa-miR-1-3p	SOX9	5.3494
hsa-miR-10a-5p	TFAP2C	5.348
hsa-miR-126-5p	MACC1	5.323
hsa-miR-148a-3p	TNRC6A	5.3217
hsa-miR-10a-5p	CRLF3	5.3192
hsa-miR-21-5p	HNRNPK	5.3138
hsa-miR-10b-5p	CRLF3	5.3075
hsa-miR-1-3p	MMD	5.3013
hsa-miR-150-5p	SP1	5.3008
hsa-miR-1-3p	HNRNPA3	5.2998
hsa-miR-155-5p	CKAP5	5.2971
hsa-miR-148a-3p	ARRDC3	5.2931
hsa-miR-10a-5p	SON	5.2876
hsa-miR-1-3p	PRKCE	5.2784
hsa-miR-155-5p	ARMC2	5.2776
hsa-miR-155-5p	CCDC82	5.275
hsa-miR-1-3p	SNAI2	5.2747
hsa-miR-1-3p	GCH1	5.2698
hsa-miR-1-3p	PGD	5.2685
hsa-miR-142-3p	RAC1	5.2676
hsa-miR-10b-5p	SON	5.2666
hsa-miR-1-3p	BSCL2	5.2585
hsa-miR-542-3p	ANGPT2	5.2576
hsa-miR-199b-5p	ZNF468	5.2558
hsa-miR-148a-3p	BTBD3	5.2556
hsa-miR-142-3p	ROCK2	5.2554
hsa-miR-1-3p	MATR3	5.2522
hsa-miR-1-3p	LARP4	5.249
hsa-miR-1-3p	FNDC3A	5.2461
hsa-miR-155-5p	MYBL1	5.2441
hsa-miR-1-3p	USP33	5.2438
hsa-miR-10a-5p	RPRD1A	5.243
hsa-miR-139-5p	ROCK2	5.2405
hsa-miR-155-5p	SLC35F2	5.2349
hsa-miR-155-5p	POLE3	5.2315
hsa-miR-155-5p	MITF	5.2281
hsa-miR-1-3p	EIF1AX	5.2037
hsa-miR-139-5p	USP6NL	5.1958
hsa-miR-142-3p	EGR2	5.1949
hsa-miR-1-3p	CAND1	5.1929
hsa-miR-155-5p	MYO10	5.1929
hsa-miR-155-5p	TM6SF1	5.187
hsa-miR-148a-3p	EOGT	5.1863
hsa-miR-1-3p	HNRNPU	5.1806
hsa-miR-133a-3p	PRDM16	5.1784
hsa-miR-148a-3p	KLF6	5.1742
hsa-miR-1-3p	CORO1C	5.1703
hsa-miR-155-5p	KDM3A	5.1669
hsa-miR-155-5p	MORC3	5.1621
hsa-miR-139-5p	NOTCH1	5.1554
hsa-miR-155-5p	AGTR1	5.1519
hsa-miR-1-3p	UNC119B	5.1451
hsa-miR-148a-3p	ITGB8	5.1433
hsa-miR-155-5p	GATM	5.1413
hsa-miR-155-5p	KRCC1	5.1316
hsa-miR-155-5p	FGF7	5.1174
hsa-miR-155-5p	CREBRF	5.1173
hsa-miR-155-5p	GPM6B	5.1166
hsa-miR-155-5p	TBC1D14	5.1136
hsa-miR-1-3p	ASH2L	5.1095
hsa-miR-542-3p	U2SURP	5.1088
hsa-miR-139-5p	APLP2	5.108
hsa-miR-142-3p	HSPA1B	5.1074
hsa-miR-10b-5p	ZMYND11	5.101
hsa-miR-155-5p	ARL6IP5	5.0991
hsa-miR-155-5p	SECISBP2	5.0815
hsa-miR-21-5p	TNFRSF10B	5.0739
hsa-miR-148a-3p	TMEM9B	5.0729
hsa-miR-1-3p	HDAC4	5.0638
hsa-miR-155-5p	PHF14	5.0583
hsa-miR-155-5p	CBR4	5.0513
hsa-miR-155-5p	SAP30L	5.0465
hsa-miR-10a-5p	TRIM2	5.0458
hsa-miR-150-5p	PDE7A	5.0444
hsa-miR-146a-5p	ELAVL1	5.0438
hsa-miR-148a-3p	SYNJ1	5.0416
hsa-miR-21-5p	KRIT1	5.0386
hsa-miR-1-3p	ADPGK	5.038
hsa-miR-148a-3p	FMR1	5.0285
hsa-miR-148a-3p	MPP5	5.0245
hsa-miR-1-3p	EIF4E	5.0236
hsa-miR-1-3p	FBXO33	5.0223
hsa-miR-21-5p	PLEKHA1	5.0184
hsa-miR-155-5p	IL17RB	5.0169
hsa-miR-139-5p	MCL1	5.016
hsa-miR-21-5p	TOPORS	5.0122
hsa-miR-148a-3p	WASL	5.0093
hsa-miR-148a-3p	LBR	5.0057
hsa-miR-150-5p	PDCD4	4.9953
hsa-miR-1-3p	THBS1	4.9951
hsa-miR-148a-3p	IRS1	4.9915
hsa-miR-21-5p	ZNF367	4.9863
hsa-miR-148a-3p	MAP3K4	4.9817
hsa-miR-146a-5p	RHOBTB3	4.979
hsa-miR-155-5p	PSIP1	4.9785
hsa-miR-146a-5p	CD40LG	4.977
hsa-miR-155-5p	CYR61	4.9739
hsa-miR-10a-5p	ELOVL2	4.9731
hsa-miR-148a-3p	CDKN1B	4.9711
hsa-miR-142-3p	BOD1	4.965
hsa-miR-155-5p	ZNF260	4.9529
hsa-miR-21-5p	COL4A1	4.9523
hsa-miR-155-5p	PRKAR1A	4.9443
hsa-miR-148a-3p	NPTN	4.9434
hsa-miR-148a-3p	CCT6A	4.9422
hsa-miR-150-5p	ZBTB4	4.9409
hsa-miR-150-5p	VEGFA	4.9387
hsa-miR-1-3p	HAND2	4.9358
hsa-miR-155-5p	ZNF611	4.9348
hsa-miR-9-3p	PCMTD1	4.9297
hsa-miR-155-5p	APAF1	4.9293
hsa-miR-150-5p	FOPNL	4.9273
hsa-miR-10b-5p	TRIM2	4.9271
hsa-miR-155-5p	SMAD1	4.922
hsa-miR-199b-5p	JAG1	4.918
hsa-miR-1-3p	PDCD10	4.9177
hsa-miR-155-5p	CHD9	4.9172
hsa-miR-150-5p	RNF165	4.9126
hsa-miR-139-5p	TBX1	4.9111
hsa-miR-542-3p	YPEL5	4.9103
hsa-miR-1-3p	SLC25A22	4.902
hsa-miR-99a-5p	KBTBD8	4.9019
hsa-miR-1-3p	PNP	4.9014
hsa-miR-139-5p	RAP1B	4.9001
hsa-miR-148a-3p	MAP3K9	4.8969
hsa-miR-150-5p	VEZF1	4.896
hsa-miR-9-3p	ZNF664	4.8957
hsa-miR-1-3p	CCSAP	4.895
hsa-miR-148a-3p	AGO4	4.8921
hsa-miR-21-5p	BMPR2	4.8918
hsa-miR-146a-5p	ERBB4	4.8829
hsa-miR-1-3p	DGKH	4.8808
hsa-miR-21-5p	ADGRG2	4.8777
hsa-miR-139-5p	MORN4	4.8766
hsa-miR-150-5p	BASP1	4.8759
hsa-miR-21-5p	APAF1	4.8743
hsa-miR-148a-3p	MTMR9	4.8728
hsa-miR-10b-5p	CNOT6	4.8709
hsa-miR-148a-3p	STARD13	4.8702
hsa-miR-1-3p	PTMA	4.8648
hsa-miR-199b-5p	MAP3K11	4.8633
hsa-miR-1-3p	KCNE1	4.8591
hsa-miR-542-3p	BMP7	4.8551
hsa-miR-1-3p	CHSY1	4.8549
hsa-miR-148a-3p	MET	4.8529
hsa-miR-10a-5p	TRA2B	4.8507
hsa-miR-155-5p	RCN2	4.8423
hsa-miR-148a-3p	ROBO1	4.8342
hsa-miR-148a-3p	MIER1	4.8297
hsa-miR-155-5p	VEZF1	4.8187
hsa-miR-1-3p	HSP90B1	4.8122
hsa-miR-1-3p	OSBPL7	4.8094
hsa-miR-1-3p	TNKS2	4.809
hsa-miR-148a-3p	RAB12	4.8078
hsa-miR-133a-3p	GSTP1	4.801
hsa-miR-21-5p	CPEB3	4.7989
hsa-miR-542-3p	UBE2E1	4.7978
hsa-miR-133a-3p	MCL1	4.797
hsa-miR-146a-5p	BRCA1	4.7941
hsa-miR-155-5p	ARL5B	4.7939
hsa-miR-1-3p	ATP6V1A	4.7935
hsa-miR-155-5p	INTS6	4.7924
hsa-miR-1-3p	SDPR	4.7903
hsa-miR-142-3p	WASL	4.7869
hsa-miR-139-5p	MEIS2	4.7838
hsa-miR-155-5p	FMNL2	4.7799
hsa-miR-146a-5p	PTGS2	4.776
hsa-miR-1-3p	GPR137C	4.7734
hsa-miR-155-5p	TCF12	4.7733
hsa-miR-1-3p	GLCCI1	4.7689
hsa-miR-1-3p	TRAPPC3	4.7674
hsa-miR-1-3p	ABCB7	4.7629
hsa-miR-155-5p	HNRNPA3	4.7605
hsa-miR-21-5p	VHL	4.7604
hsa-miR-155-5p	TWF1	4.7459
hsa-miR-150-5p	SRCIN1	4.7455
hsa-miR-10a-5p	ARSK	4.7449
hsa-miR-10b-5p	ARSK	4.7431
hsa-miR-1-3p	SULF1	4.741
hsa-miR-148a-3p	VPS37A	4.7394
hsa-miR-1-3p	RNF138	4.7373
hsa-miR-542-3p	CDC5L	4.7361
hsa-miR-155-5p	GCSAM	4.7361
hsa-miR-10a-5p	HOXA3	4.7357
hsa-miR-139-5p	STAMBP	4.7349
hsa-miR-21-5p	RASA1	4.7294
hsa-miR-9-3p	KITLG	4.7268
hsa-miR-10a-5p	BLOC1S5	4.7256
hsa-miR-148a-3p	ATP6AP2	4.7195
hsa-miR-142-3p	PROM1	4.7169
hsa-miR-126-5p	HOXB6	4.7146
hsa-miR-155-5p	TSPAN14	4.7134
hsa-miR-142-3p	SLC37A3	4.7128
hsa-miR-148a-3p	ZFYVE26	4.7115
hsa-miR-542-3p	ATXN1	4.7089
hsa-miR-1-3p	LRRC8A	4.7013
hsa-miR-1-3p	ARF3	4.6993
hsa-miR-542-3p	PCNA	4.6984
hsa-miR-10b-5p	DAZAP1	4.6938
hsa-miR-542-3p	FHOD3	4.6927
hsa-miR-155-5p	C3ORF18	4.6925
hsa-miR-155-5p	C16ORF62	4.6909
hsa-miR-10b-5p	BCL2L11	4.688
hsa-miR-10a-5p	BTRC	4.6878
hsa-miR-155-5p	TRIM32	4.68
hsa-miR-10a-5p	XRN1	4.6788
hsa-miR-139-5p	FBN2	4.6781
hsa-miR-1-3p	IFT52	4.6692
hsa-miR-139-5p	H2AFV	4.6687
hsa-miR-139-5p	PHF6	4.6667
hsa-miR-21-5p	IL12A	4.6664
hsa-miR-155-5p	DPY19L1	4.666
hsa-miR-148a-3p	SERPINE1	4.6657
hsa-miR-1-3p	MIPOL1	4.6591
hsa-miR-155-5p	CIAPIN1	4.6561
hsa-miR-148a-3p	OSBPL11	4.654
hsa-miR-126-3p	PIK3R2	4.6539
hsa-miR-142-3p	RICTOR	4.6492
hsa-miR-146a-5p	UHRF1	4.642
hsa-miR-150-5p	EP300	4.6413
hsa-miR-155-5p	CEP41	4.6375
hsa-miR-139-5p	LRCH2	4.6363
hsa-miR-148a-3p	B4GALT5	4.6354
hsa-miR-155-5p	INPP5D	4.6347
hsa-miR-21-5p	SERPINI1	4.6341
hsa-miR-1-3p	CCDC170	4.6335
hsa-miR-9-3p	RCOR1	4.6267
hsa-miR-155-5p	MAP3K14	4.6249
hsa-miR-142-3p	LCOR	4.6247
hsa-miR-10b-5p	NRP2	4.6188
hsa-miR-148a-3p	SRSF11	4.6177
hsa-miR-155-5p	UPF2	4.6175
hsa-miR-1-3p	HOOK1	4.6174
hsa-miR-155-5p	PHC2	4.6171
hsa-miR-1-3p	ZMAT3	4.6142
hsa-miR-142-3p	CLTA	4.609
hsa-miR-148a-3p	PAPD4	4.609
hsa-miR-155-5p	TRAM1	4.6038
hsa-miR-142-3p	LRRC32	4.6023
hsa-miR-126-5p	RFX4	4.5989
hsa-miR-155-5p	DCUN1D2	4.5979
hsa-miR-155-5p	MRPS27	4.5959
hsa-miR-9-3p	TPD52	4.5959
hsa-miR-10a-5p	RORA	4.5933
hsa-miR-10a-5p	RAP2A	4.5906
hsa-miR-9-3p	GABRA1	4.5903
hsa-miR-21-5p	PBRM1	4.5897
hsa-miR-126-5p	ESRRG	4.5834
hsa-miR-1-3p	UTRN	4.583
hsa-miR-21-5p	ANKRD46	4.5828
hsa-miR-133a-3p	MSN	4.5819
hsa-miR-155-5p	TYRP1	4.5792
hsa-miR-1-3p	SRSF9	4.5785
hsa-miR-1-3p	SRI	4.5768
hsa-miR-155-5p	ZBTB38	4.5765
hsa-miR-155-5p	SLC33A1	4.5749
hsa-miR-139-5p	DCBLD2	4.571
hsa-miR-1-3p	NOTCH3	4.57
hsa-miR-10b-5p	TRA2B	4.5677
hsa-miR-10a-5p	RNF2	4.5674
hsa-miR-1-3p	DHX15	4.5655
hsa-miR-148a-3p	SZRD1	4.5615
hsa-miR-150-5p	IRAK2	4.5615
hsa-miR-148a-3p	WDR47	4.5605
hsa-miR-1-3p	ARID2	4.5602
hsa-miR-10b-5p	RNF2	4.5599
hsa-miR-1-3p	CDC42SE1	4.5551
hsa-miR-148a-3p	EPS15	4.5539
hsa-miR-10a-5p	GALNT1	4.5536
hsa-miR-155-5p	SYPL1	4.5478
hsa-miR-10b-5p	RORA	4.5459
hsa-miR-148a-3p	USP33	4.5456
hsa-miR-148a-3p	PNPLA6	4.5438
hsa-miR-10a-5p	CNOT6	4.5425
hsa-miR-150-5p	EREG	4.5412
hsa-miR-148a-3p	NRP1	4.5403
hsa-miR-148a-3p	SMAD2	4.5386
hsa-miR-9-3p	TFAP2B	4.5368
hsa-miR-199b-5p	ARHGAP12	4.5365
hsa-miR-155-5p	AGO4	4.5364
hsa-miR-21-5p	STAG2	4.5352
hsa-miR-1-3p	GNPDA2	4.5321
hsa-miR-148a-3p	SLC25A44	4.5306
hsa-miR-21-5p	RHOB	4.5273
hsa-miR-148a-3p	MEOX2	4.5265
hsa-miR-155-5p	ZNF248	4.5259
hsa-miR-150-5p	ENSA	4.5257
hsa-miR-10b-5p	LCA5	4.5244
hsa-miR-148a-3p	PPP6R1	4.5218
hsa-miR-139-5p	TMF1	4.5212
hsa-miR-9-3p	SPOPL	4.5196
hsa-miR-199b-5p	RALGAPA1	4.5183
hsa-miR-1-3p	NRP1	4.5178
hsa-miR-199b-5p	ZNF763	4.5109
hsa-miR-148a-3p	KIAA1468	4.5091
hsa-miR-1-3p	BACH2	4.5064
hsa-miR-142-3p	FAM208B	4.5058
hsa-miR-148a-3p	DENND4C	4.5033
hsa-miR-139-5p	NDRG4	4.5006
hsa-miR-1-3p	KCNIP3	4.5006
hsa-miR-10b-5p	TMEM183A	4.5003
hsa-miR-10a-5p	EPHA4	4.4987
hsa-miR-126-5p	HOXC8	4.4963
hsa-miR-139-5p	ZEB1	4.4945
hsa-miR-148a-3p	SECISBP2L	4.4928
hsa-miR-139-5p	HNRNPF	4.4921
hsa-miR-139-5p	EIF4G2	4.4919
hsa-miR-155-5p	ARPC3	4.4917
hsa-miR-10a-5p	PLA1A	4.4911
hsa-miR-148a-5p	RBM24	4.4856
hsa-miR-155-5p	KIAA0430	4.483
hsa-miR-148a-3p	PIGA	4.4812
hsa-miR-1-3p	RRBP1	4.4805
hsa-miR-139-5p	PAK7	4.4795
hsa-miR-148a-3p	FXR1	4.4784
hsa-miR-155-5p	SSX2IP	4.4784
hsa-miR-1-3p	ANKIB1	4.4778
hsa-miR-146a-5p	STAT1	4.4766
hsa-miR-9-3p	ITPRIPL2	4.475
hsa-miR-10b-5p	FNBP1L	4.4719
hsa-miR-142-3p	USP6NL	4.4698
hsa-miR-148a-3p	ADGRB3	4.4692
hsa-miR-9-3p	TMEM64	4.4682
hsa-miR-148a-3p	UCP3	4.4672
hsa-miR-155-5p	ACTR2	4.4641
hsa-miR-139-5p	SEPT11	4.4612
hsa-miR-148a-3p	MXD1	4.4604
hsa-miR-148a-3p	JARID2	4.4595
hsa-miR-21-5p	MAP2K3	4.4588
hsa-miR-10a-5p	TMEM183A	4.4555
hsa-miR-148a-3p	PRNP	4.453
hsa-miR-1-3p	AP3D1	4.4508
hsa-miR-139-5p	UBE2F	4.4491
hsa-miR-148a-3p	HLA-A	4.4481
hsa-miR-126-5p	CASK	4.4476
hsa-miR-133a-3p	PRRT2	4.4464
hsa-miR-21-5p	ATXN10	4.4461
hsa-miR-139-5p	PDE3A	4.4451
hsa-miR-542-3p	KMT2E	4.4449
hsa-miR-139-5p	IGF1R	4.4437
hsa-miR-139-5p	AEBP2	4.442
hsa-miR-21-5p	MTPN	4.4386
hsa-miR-139-5p	SLC25A3	4.4361
hsa-miR-10a-5p	USF2	4.436
hsa-miR-139-5p	CHFR	4.4355
hsa-miR-155-5p	LIN7C	4.4354
hsa-miR-142-3p	LPP	4.4327
hsa-miR-126-5p	MDH1	4.4314
hsa-miR-199b-5p	SULF1	4.4296
hsa-miR-126-5p	GABRB2	4.4279
hsa-miR-155-5p	SMAD5	4.4255
hsa-miR-1-3p	SCAF11	4.4243
hsa-miR-148a-3p	ATP11A	4.4233
hsa-miR-155-5p	E2F2	4.4204
hsa-miR-199b-5p	KL	4.4181
hsa-miR-1-3p	SH3BGRL3	4.4181
hsa-miR-1-3p	AP1G1	4.4176
hsa-miR-199b-5p	CELSR1	4.4161
hsa-miR-10a-5p	BDNF	4.4158
hsa-miR-9-3p	ACTL6A	4.4135
hsa-miR-10a-5p	DAZAP1	4.4133
hsa-miR-155-5p	ANXA2	4.4116
hsa-miR-199b-5p	RNF11	4.4098
hsa-miR-1-3p	TPM3	4.4096
hsa-miR-1-3p	KCNJ2	4.4065
hsa-miR-9-3p	YAF2	4.4049
hsa-miR-1-3p	PFDN1	4.4031
hsa-miR-148a-3p	ZDHHC17	4.4029
hsa-miR-155-5p	TCF4	4.4016
hsa-miR-1-3p	TMEM68	4.3976
hsa-miR-148a-3p	CDC14A	4.3971
hsa-miR-1-3p	ARHGEF18	4.3969
hsa-miR-1-3p	AKAP12	4.3941
hsa-miR-139-5p	TMEM33	4.3906
hsa-miR-199b-5p	MICAL3	4.3893
hsa-miR-1-3p	RASA1	4.3863
hsa-miR-1-3p	PHAX	4.3855
hsa-miR-142-3p	HMGA1	4.3818
hsa-miR-10a-5p	H3F3B	4.3815
hsa-miR-10b-5p	H3F3B	4.3809
hsa-miR-1-3p	RABGAP1L	4.3806
hsa-miR-148a-3p	AGO1	4.3805
hsa-miR-148a-5p	PDPK1	4.3792
hsa-miR-1-3p	PARVA	4.3767
hsa-miR-542-3p	COLGALT2	4.3742
hsa-miR-10a-5p	PAPD5	4.3737
hsa-miR-10a-5p	BCR	4.3728
hsa-miR-9-3p	DCBLD2	4.3728
hsa-miR-199b-5p	HMCN1	4.3701
hsa-miR-155-5p	GNAS	4.3689
hsa-miR-21-5p	FAM46A	4.3621
hsa-miR-148a-3p	QKI	4.3611
hsa-miR-148a-3p	HLA-C	4.3598
hsa-miR-155-5p	BTBD1	4.3591
hsa-miR-148a-3p	ABCB7	4.3587
hsa-miR-21-5p	CCL1	4.3567
hsa-miR-150-5p	ELK1	4.3539
hsa-miR-1-3p	ZNF280D	4.352
hsa-miR-126-5p	L2HGDH	4.3518
hsa-miR-10a-5p	FNBP1L	4.3505
hsa-miR-148a-3p	ARFIP1	4.3484
hsa-miR-199b-5p	SOS2	4.3481
hsa-miR-126-5p	TSC22D4	4.3478
hsa-miR-148a-3p	INO80	4.3464
hsa-miR-1-3p	CCL2	4.346
hsa-miR-148a-3p	HLA-G	4.3455
hsa-miR-199b-5p	ZNF419	4.3454
hsa-miR-1-3p	NDRG3	4.3438
hsa-miR-146a-5p	WWC2	4.343
hsa-miR-1-3p	CPEB1	4.3414
hsa-miR-1-3p	MMD2	4.3408
hsa-miR-155-5p	CSNK1G2	4.3398
hsa-miR-10a-5p	ITSN1	4.3394
hsa-miR-199b-5p	ETS1	4.3356
hsa-miR-1-3p	CEBPZ	4.3356
hsa-miR-148a-3p	HOXC8	4.3349
hsa-miR-148a-3p	KMT2A	4.3327
hsa-miR-155-5p	RREB1	4.3317
hsa-miR-148a-3p	FAM104A	4.331
hsa-miR-10a-5p	PTEN	4.3304
hsa-miR-148a-3p	GADD45A	4.3284
hsa-miR-146a-5p	ZBTB2	4.3281
hsa-miR-148a-3p	CNTN4	4.3266
hsa-miR-21-5p	LRRC57	4.3261
hsa-miR-1-3p	KTN1	4.3255
hsa-miR-199b-5p	PPP1R2	4.3254
hsa-miR-9-3p	ONECUT2	4.3248
hsa-miR-150-5p	NR2F2	4.3243
hsa-miR-10b-5p	CADM1	4.3238
hsa-miR-148a-3p	NR2C2AP	4.3207
hsa-miR-1-3p	CPED1	4.3202
hsa-miR-199b-5p	SET	4.3185
hsa-miR-139-5p	CCT5	4.3178
hsa-miR-139-5p	TPD52	4.317
hsa-miR-150-5p	MTCH2	4.3137
hsa-miR-9-3p	PAN3	4.3123
hsa-miR-148a-3p	DICER1	4.3102
hsa-miR-155-5p	RGL1	4.3084
hsa-miR-21-5p	FBXO11	4.307
hsa-miR-139-5p	HARS2	4.3063
hsa-miR-199b-5p	LIN7C	4.3045
hsa-miR-9-3p	YIPF5	4.304
hsa-miR-1-3p	MPL	4.3018
hsa-miR-155-5p	CYP2U1	4.3014
hsa-miR-139-5p	CBLL1	4.2994
hsa-miR-148a-3p	CDC25B	4.2994
hsa-miR-21-5p	TPRG1L	4.2972
hsa-miR-148a-3p	MMP15	4.2967
hsa-miR-199b-5p	FAM222B	4.2967
hsa-miR-148a-3p	RSBN1L	4.2965
hsa-miR-142-3p	TWF1	4.2964
hsa-miR-142-3p	CPEB2	4.2955
hsa-miR-148a-3p	NPEPL1	4.294
hsa-miR-148a-3p	HECW2	4.2921
hsa-miR-1-3p	CREM	4.2914
hsa-miR-139-5p	NRK	4.29
hsa-miR-148a-3p	OTUD4	4.2892
hsa-miR-199b-5p	SLC24A3	4.2891
hsa-miR-148a-3p	DYNLL2	4.2878
hsa-miR-139-5p	TGIF1	4.2873
hsa-miR-148a-3p	ITSN2	4.2856
hsa-miR-146a-5p	STRBP	4.2853
hsa-miR-10b-5p	MAP3K7	4.2753
hsa-miR-155-5p	SHANK2	4.2745
hsa-miR-10b-5p	PTEN	4.2744
hsa-miR-146a-5p	SQSTM1	4.2737
hsa-miR-142-3p	TSEN34	4.2723
hsa-miR-9-3p	TPD52L2	4.2708
hsa-miR-199b-5p	ZNF439	4.2695
hsa-miR-146a-5p	HSPA1A	4.2693
hsa-miR-1-3p	FUBP1	4.2691
hsa-miR-9-3p	NXT2	4.2685
hsa-miR-199b-5p	KIT	4.2684
hsa-miR-21-5p	GLCCI1	4.2662
hsa-miR-139-5p	ANK2	4.2661
hsa-miR-199b-5p	CCDC120	4.2654
hsa-miR-1-3p	RARB	4.2624
hsa-miR-199b-5p	ZNF563	4.2604
hsa-miR-10a-5p	ZMYND11	4.2568
hsa-miR-199b-5p	RBPMS	4.2558
hsa-miR-9-3p	RIT1	4.2553
hsa-miR-150-5p	DCAF6	4.2542
hsa-miR-155-5p	SMAD2	4.2529
hsa-miR-21-5p	PIK3R1	4.252
hsa-miR-155-5p	STRN3	4.2495
hsa-miR-1-3p	UHMK1	4.2483
hsa-miR-148a-3p	RHD	4.2472
hsa-miR-139-5p	AP1S2	4.2469
hsa-miR-1-3p	AGO1	4.2461
hsa-miR-139-5p	NANOGNB	4.2444
hsa-miR-542-3p	PFKM	4.2442
hsa-miR-21-5p	PPARA	4.2428
hsa-miR-1-3p	SRXN1	4.2414
hsa-miR-150-5p	MDM4	4.2388
hsa-miR-150-5p	ETF1	4.2378
hsa-miR-155-5p	CARD11	4.2366
hsa-miR-139-5p	KAT6A	4.2354
hsa-miR-9-3p	STC1	4.2354
hsa-miR-10b-5p	HOXD10	4.2348
hsa-miR-1-3p	CERS2	4.2341
hsa-miR-1-3p	RIT2	4.2338
hsa-miR-142-3p	BACH1	4.2325
hsa-miR-142-3p	KAT7	4.2309
hsa-miR-10a-5p	ZNF445	4.2305
hsa-miR-139-5p	PAPD4	4.2296
hsa-miR-155-5p	DUSP14	4.2273
hsa-miR-148a-3p	SNAPIN	4.2272
hsa-miR-148a-3p	MTMR10	4.2195
hsa-miR-10b-5p	ZNF445	4.2188
hsa-miR-148a-3p	CLCN6	4.2188
hsa-miR-9-3p	JAZF1	4.218
hsa-miR-10a-5p	KLF11	4.2165
hsa-miR-155-5p	LNX2	4.2165
hsa-miR-146a-5p	USP3	4.2155
hsa-miR-148a-3p	CEP55	4.2146
hsa-miR-139-5p	NDRG2	4.2137
hsa-miR-9-3p	MPPED2	4.2131
hsa-miR-142-3p	ACSL4	4.2093
hsa-miR-542-3p	DCBLD2	4.2079
hsa-miR-142-3p	FNDC3A	4.2077
hsa-miR-148a-3p	PIK3IP1	4.2066
hsa-miR-148a-3p	STXBP5	4.2051
hsa-miR-542-3p	TRAPPC2	4.205
hsa-miR-155-5p	SH3PXD2A	4.2036
hsa-miR-10b-5p	NCOA6	4.2028
hsa-miR-10a-5p	CADM1	4.2003
hsa-miR-10b-5p	HTATIP2	4.2001
hsa-miR-21-5p	EPM2A	4.1997
hsa-miR-150-5p	P2RX7	4.199
hsa-miR-199b-5p	FAM188A	4.1982
hsa-miR-199b-5p	UBAP1	4.1977
hsa-miR-148a-3p	E2F7	4.1974
hsa-miR-148a-3p	SKP1	4.1973
hsa-miR-199b-5p	ANK3	4.1965
hsa-miR-146a-5p	SRSF6	4.1959
hsa-miR-1-3p	HIGD1A	4.1952
hsa-miR-148a-3p	NR1I2	4.1948
hsa-miR-1-3p	PLPPR4	4.1933
hsa-miR-139-5p	ZRANB2	4.1923
hsa-miR-542-3p	TSC22D1	4.1913
hsa-miR-199b-5p	NSG1	4.1899
hsa-miR-1-3p	HMBOX1	4.1892
hsa-miR-126-5p	HSPB8	4.1868
hsa-miR-146a-5p	NOVA1	4.1848
hsa-miR-199b-5p	CCDC43	4.1843
hsa-miR-155-5p	GABRA1	4.1831
hsa-miR-9-3p	ESRRG	4.1824
hsa-miR-142-3p	TMEM59	4.1817
hsa-miR-142-3p	ASH1L	4.1814
hsa-miR-9-3p	TMEM255A	4.1813
hsa-miR-126-3p	ADAM9	4.1802
hsa-miR-150-5p	COL4A4	4.1798
hsa-miR-542-3p	GRSF1	4.1792
hsa-miR-139-5p	LRFN5	4.1763
hsa-miR-199b-5p	NTNG1	4.1749
hsa-miR-199b-5p	SUN1	4.1736
hsa-miR-148a-3p	GPATCH8	4.1734
hsa-miR-148a-3p	TRIM59	4.1716
hsa-miR-150-5p	NUBPL	4.1716
hsa-miR-148a-3p	RBM24	4.1706
hsa-miR-148a-3p	RTN4	4.1704
hsa-miR-148a-3p	ATP8A1	4.1694
hsa-miR-10b-5p	KLF11	4.1688
hsa-miR-1-3p	IGF1	4.1685
hsa-miR-155-5p	NFATC2IP	4.1682
hsa-miR-139-5p	AZIN1	4.1679
hsa-miR-10a-5p	ZNF502	4.1665
hsa-miR-21-5p	KBTBD6	4.1655
hsa-miR-542-3p	AP3D1	4.1637
hsa-miR-148a-3p	NCOA1	4.1628
hsa-miR-148a-3p	CDK5R1	4.1623
hsa-miR-155-5p	S1PR1	4.1611
hsa-miR-155-5p	ADD3	4.1604
hsa-miR-139-5p	SCAPER	4.1601
hsa-miR-9-3p	KIAA1217	4.159
hsa-miR-542-3p	SERPINB8	4.1585
hsa-miR-148a-3p	MTMR1	4.1583
hsa-miR-199b-5p	MYRF	4.1583
hsa-miR-155-5p	RHEB	4.1574
hsa-miR-148a-3p	ESR1	4.1569
hsa-miR-10a-5p	ZNF367	4.1561
hsa-miR-150-5p	NOTCH3	4.1558
hsa-miR-10b-5p	ZNF502	4.1554
hsa-miR-155-5p	SGK3	4.1542
hsa-miR-155-5p	ZNF431	4.1531
hsa-miR-155-5p	YWHAZ	4.1527
hsa-miR-199b-5p	COMT	4.1516
hsa-miR-148a-3p	BTAF1	4.1511
hsa-miR-155-5p	MMP16	4.1506
hsa-miR-126-5p	MYEF2	4.1488
hsa-miR-142-3p	ZNF217	4.1485
hsa-miR-199b-5p	ARHGAP21	4.1483
hsa-miR-542-3p	ELAVL2	4.1463
hsa-miR-148a-3p	PPP1R10	4.1458
hsa-miR-21-5p	TGFBR3	4.1455
hsa-miR-139-5p	RFX7	4.1451
hsa-miR-148a-3p	DNMT3B	4.1448
hsa-miR-139-5p	PDE4A	4.1422
hsa-miR-1-3p	SLC10A7	4.142
hsa-miR-9-3p	FBXO28	4.1413
hsa-miR-148a-3p	PTEN	4.141
hsa-miR-10b-5p	PLA1A	4.1409
hsa-miR-155-5p	PAXBP1	4.1407
hsa-miR-150-5p	STOX1	4.1395
hsa-miR-542-3p	GPX8	4.1388
hsa-miR-148a-3p	RAB14	4.1371
hsa-miR-142-3p	SMG1	4.1368
hsa-miR-542-3p	MYLIP	4.1363
hsa-miR-146a-5p	ZNF253	4.1361
hsa-miR-148a-3p	ZDHHC7	4.1357
hsa-miR-139-5p	KIF13A	4.1348
hsa-miR-155-5p	TAPT1	4.1347
hsa-miR-142-3p	FBXO3	4.1335
hsa-miR-148a-3p	ARFGEF1	4.1324
hsa-miR-148a-3p	CAND1	4.1318
hsa-miR-21-5p	UBR3	4.1309
hsa-miR-199b-5p	TXLNB	4.129
hsa-miR-1-3p	CAAP1	4.1275
hsa-miR-1-3p	PIM1	4.1272
hsa-miR-10a-5p	HOXB3	4.1267
hsa-miR-150-5p	KMT2A	4.1262
hsa-miR-542-3p	TFEC	4.1256
hsa-miR-21-5p	SLMAP	4.1253
hsa-miR-155-5p	FOS	4.1241
hsa-miR-155-5p	SEPT11	4.1241
hsa-miR-10a-5p	MTF2	4.1234
hsa-miR-139-5p	GPM6A	4.1233
hsa-miR-155-5p	DENND1B	4.1201
hsa-miR-199b-5p	AP1G1	4.1178
hsa-miR-148a-3p	PRKAG2	4.1176
hsa-miR-9-3p	PCDHA1	4.1176
hsa-miR-1-3p	SOX6	4.1167
hsa-miR-10a-5p	E2F7	4.1126
hsa-miR-139-5p	TCF12	4.1078
hsa-miR-146a-5p	EGFR	4.1076
hsa-miR-139-5p	FMR1	4.1069
hsa-miR-99a-5p	IGF1R	4.1061
hsa-miR-142-3p	SUCO	4.1034
hsa-miR-9-3p	LMO3	4.1033
hsa-miR-9-3p	ERMN	4.1031
hsa-miR-10b-5p	TFRC	4.1018
hsa-miR-542-3p	ZNF618	4.1018
hsa-miR-10a-5p	TFRC	4.1009
hsa-miR-139-5p	LRP12	4.1009
hsa-miR-148a-5p	UBR3	4.1006
hsa-miR-148a-3p	MLLT10	4.0979
hsa-miR-1-3p	SUSD1	4.0965
hsa-miR-1-3p	KANK4	4.0957
hsa-miR-155-5p	ARFIP1	4.0947
hsa-miR-1-3p	LIN7C	4.0945
hsa-miR-199b-5p	VPS26A	4.0915
hsa-miR-126-5p	MMRN1	4.0912
hsa-miR-9-3p	PCDHA4	4.0909
hsa-miR-9-3p	PCDHA5	4.0905
hsa-miR-139-5p	ADGRL4	4.0887
hsa-miR-199b-5p	IPO8	4.0884
hsa-miR-199b-5p	MGAT4B	4.0869
hsa-miR-1-3p	WDR48	4.0859
hsa-miR-126-5p	PDE7B	4.0848
hsa-miR-155-5p	GOLT1B	4.0837
hsa-miR-148a-3p	LIPA	4.0834
hsa-miR-155-5p	CD36	4.0829
hsa-miR-139-5p	PIEZO1	4.0828
hsa-miR-10b-5p	FIGN	4.0826
hsa-miR-1-3p	SEPT6	4.081
hsa-miR-148a-3p	LYSMD3	4.0805
hsa-miR-148a-3p	ZFPM2	4.0804
hsa-miR-148a-3p	LDLR	4.0801
hsa-miR-146a-5p	CCK	4.0798
hsa-miR-148a-3p	GOLT1B	4.0797
hsa-miR-139-5p	ELOVL5	4.0796
hsa-miR-10a-5p	KLHL29	4.0794
hsa-miR-1-3p	OAT	4.0791
hsa-miR-150-5p	CALCR	4.0777
hsa-miR-142-3p	SIK1	4.0775
hsa-miR-9-3p	KLHL15	4.0774
hsa-miR-542-3p	CNTD1	4.0763
hsa-miR-21-5p	HPGD	4.076
hsa-miR-10b-5p	BLOC1S5	4.0757
hsa-miR-542-3p	TRNT1	4.0751
hsa-miR-139-5p	GPD1L	4.075
hsa-miR-199b-5p	NR1I3	4.075
hsa-miR-155-5p	TADA2B	4.0745
hsa-miR-150-5p	EIF4B	4.0737
hsa-miR-148a-3p	USP48	4.0731
hsa-miR-133a-3p	FSCN1	4.0731
hsa-miR-126-5p	TMEM182	4.073
hsa-miR-155-5p	CHAF1A	4.0696
hsa-miR-199b-5p	GCNT2	4.0692
hsa-miR-9-3p	PCDHA13	4.0681
hsa-miR-155-5p	RAB5C	4.0656
hsa-miR-1-3p	SRSF1	4.0651
hsa-miR-199b-5p	PLXND1	4.0627
hsa-miR-21-5p	PAN3	4.0612
hsa-miR-9-3p	DR1	4.0608
hsa-miR-542-3p	TMEM65	4.0606
hsa-miR-155-5p	VPS18	4.0602
hsa-miR-148a-5p	AGL	4.0599
hsa-miR-1-3p	H3F3B	4.0586
hsa-miR-133a-3p	SEC61B	4.057
hsa-miR-9-3p	COL4A3BP	4.0553
hsa-miR-10a-5p	FUT1	4.0545
hsa-miR-148a-5p	SIX4	4.0533
hsa-miR-10a-5p	RNF165	4.0522
hsa-miR-146a-5p	KLF7	4.0521
hsa-miR-150-5p	NLRP7	4.0515
hsa-miR-199b-5p	ADD3	4.0514
hsa-miR-10b-5p	ZNF367	4.0509
hsa-miR-148a-3p	AP4E1	4.0509
hsa-miR-148a-3p	VAV2	4.0505
hsa-miR-1-3p	SNX2	4.0498
hsa-miR-148a-3p	MED12L	4.0496
hsa-miR-148a-3p	CCDC85A	4.0464
hsa-miR-148a-3p	RNF38	4.0452
hsa-miR-139-5p	EBF1	4.0445
hsa-miR-148a-5p	PHTF2	4.0435
hsa-miR-199b-5p	CSGALNACT1	4.0426
hsa-miR-148a-5p	RBMXL1	4.042
hsa-miR-146a-5p	BRCA2	4.0413
hsa-miR-146a-5p	DTNA	4.04
hsa-miR-146a-5p	SMAD4	4.0384
hsa-miR-542-3p	SYS1	4.0379
hsa-miR-148a-3p	FBN1	4.0378
hsa-miR-21-5p	MTMR12	4.0378
hsa-miR-155-5p	DOCK1	4.0378
hsa-miR-1-3p	ANXA4	4.0369
hsa-miR-148a-3p	HSP90B1	4.0359
hsa-miR-542-3p	LMAN2L	4.0349
hsa-miR-139-5p	NDUFB5	4.0348
hsa-miR-148a-3p	KANSL1	4.034
hsa-miR-21-5p	TP63	4.0338
hsa-miR-9-3p	ZFHX3	4.0335
hsa-miR-199b-5p	ZFYVE27	4.0329
hsa-miR-148a-3p	MTCL1	4.0319
hsa-miR-1-3p	TBC1D15	4.0316
hsa-miR-148a-3p	RNF219	4.0313
hsa-miR-148a-3p	SIK1	4.0307
hsa-miR-199b-5p	IGFBP1	4.0305
hsa-miR-1-3p	TSPAN4	4.0305
hsa-miR-199b-5p	RANBP2	4.03
hsa-miR-155-5p	ANAPC16	4.0278
hsa-miR-139-5p	SSX2IP	4.0274
hsa-miR-542-3p	ADAMTSL5	4.0267
hsa-miR-9-3p	BNIP3L	4.0261
hsa-miR-148a-3p	TMEM63B	4.0257
hsa-miR-155-5p	TTF1	4.0247
hsa-miR-9-3p	LHFPL3	4.0232
hsa-miR-148a-3p	TGFA	4.023
hsa-miR-199b-5p	AKAP1	4.0216
hsa-miR-142-3p	HECTD1	4.0201
hsa-miR-148a-3p	YWHAB	4.0171
hsa-miR-148a-3p	TXNIP	4.0167
hsa-miR-1-3p	DGKE	4.0159
hsa-miR-542-3p	IL1RAP	4.0151
hsa-miR-21-5p	RNF103	4.014
hsa-miR-10b-5p	KLHL29	4.0124
hsa-miR-142-3p	RGL2	4.0119
hsa-miR-1-3p	EML3	4.011
hsa-miR-155-5p	PBRM1	4.0108
hsa-miR-542-3p	SIDT1	4.0101
hsa-miR-142-3p	EML4	4.0091
hsa-miR-21-5p	SUZ12	4.0091
hsa-miR-155-5p	C17ORF80	4.009
hsa-miR-1-3p	EBPL	4.0089
hsa-miR-199b-5p	APMAP	4.0087
hsa-miR-148a-3p	SNAP91	4.0081
hsa-miR-199b-5p	SORCS3	4.008
hsa-miR-542-3p	MYH9	4.0078
hsa-miR-9-3p	MIER1	4.0073
hsa-miR-126-3p	VCAM1	4.0071
hsa-miR-142-3p	ITGAV	4.0067
hsa-miR-10a-5p	KCNA6	4.0052
hsa-miR-139-5p	BAZ2B	4.0044
hsa-miR-21-5p	SCML2	4.0041
hsa-miR-10b-5p	ITSN1	4.0032
hsa-miR-199b-5p	NAA40	4.0021
hsa-miR-10b-5p	HOXA1	4.0005
